# Supplementary material for: Large-scale placenta DNA methylation integrated analysis reveals fetal sex-specific differentially methylated CpG sites and regions
Source: PubMed Central journal article supplement (PMC9174475; doi:10.1038/s41598-022-13544-z), 2022-06-07

**Supplementary Table 1: Datasets included in this study.** Included Full Term Analysis: Y/N variable indicating if samples from dataset were used in full term analysis. Inclusion Criteria Full Term Analysis: criteria to select samples for full term analysis. Included Early Term Analysis: Y/N variable indicating if samples from dataset were used in any of the trimester specific analyses. Inclusion Criteria Early Term Analysis: criteria to select samples for inclusion in trimester specific cohorts. N\_Term/1stTerm/2ndTerm/3rdTerm: Number of samples (after duplicate removal, pre QC) included from dataset in each analysis subgroup. T = total count, M = male sex, F = female sex.

| GEOID            | Included Full Term Analysis | Inclusion Criteria Full Term Analysis | Included Early Term Analysis | Inclusion Criteria Early Term Analysis | Full Term |     |     | Trimester 3 |    |    | Trimester 2 |    |    | Trimester 1 |    |    |
|------------------|-----------------------------|---------------------------------------|------------------------------|----------------------------------------|-----------|-----|-----|-------------|----|----|-------------|----|----|-------------|----|----|
|                  |                             |                                       |                              |                                        | T         | M   | F   | T           | M  | F  | T           | M  | F  | T           | M  | F  |
| <i>GSE108567</i> | Y                           | Via Gestational Age                   | Y                            | Via Gestational Age                    | 45        | 23  | 22  | 12          | 6  | 6  | 0           | 0  | 0  | 0           | 0  | 0  |
| <i>GSE100197</i> | Y                           | Term control                          | Y                            | Preterm control                        | 7         | 3   | 4   | 21          | 14 | 7  | 2           | 1  | 1  | 0           | 0  | 0  |
| <i>GSE98224</i>  | Y                           | Term control, AGA                     | Y                            | Preterm, control, AGA                  | 9         | 6   | 3   | 5           | 4  | 1  | 0           | 0  | 0  | 0           | 0  | 0  |
| <i>GSE106089</i> | N                           | NA                                    | Y                            | All                                    | 0         | 0   | 0   | 0           | 0  | 0  | 46          | 28 | 18 | 0           | 0  | 0  |
| <i>GSE103413</i> | N                           | NA                                    | Y                            | Chorionic villus                       | 0         | 0   | 0   | 0           | 0  | 0  | 2           | 0  | 2  | 0           | 0  | 0  |
| <i>GSE98938</i>  | Y                           | chorion, trophoblast, villi           | Y                            | chorion, villi, trophoblast            | 6         | 3   | 3   | 0           | 0  | 0  | 4           | 2  | 2  | 0           | 0  | 0  |
| <i>GSE93208</i>  | N                           | NA                                    | Y                            | All                                    | 0         | 0   | 0   | 0           | 0  | 0  | 0           | 0  | 0  | 19          | 10 | 9  |
| <i>GSE71719</i>  | Y                           | Bisulfite converted                   | N                            | NA                                     | 23        | 12  | 11  | 0           | 0  | 0  | 0           | 0  | 0  | 0           | 0  | 0  |
| <i>GSE71678</i>  | Y                           | All                                   | N                            | NA                                     | 322       | 171 | 151 | 0           | 0  | 0  | 0           | 0  | 0  | 0           | 0  | 0  |
| <i>GSE75248</i>  | Y                           | AGA samples                           | N                            | NA                                     | 174       | 90  | 84  | 0           | 0  | 0  | 0           | 0  | 0  | 0           | 0  | 0  |
| <i>GSE75196</i>  | Y                           | Healthy                               | N                            | NA                                     | 16        | 7   | 9   | 0           | 0  | 0  | 0           | 0  | 0  | 0           | 0  | 0  |
| <i>GSE69502</i>  | N                           | NA                                    | Y                            | Chorionic Villi, Controls              | 0         | 0   | 0   | 0           | 0  | 0  | 16          | 0  | 16 | 0           | 0  | 0  |
| <i>GSE74738</i>  | Y                           | Controls                              | N                            | NA                                     | 2         | 1   | 1   | 0           | 0  | 0  | 0           | 0  | 0  | 0           | 0  | 0  |
| <i>GSE66210</i>  | N                           | NA                                    | N                            | Chorionic villus, normal               | 0         | 0   | 0   | 0           | 0  | 0  | 0           | 0  | 0  | 12          | 6  | 6  |
|                  |                             |                                       |                              | <b>SUM</b>                             | 604       | 316 | 288 | 38          | 24 | 14 | 70          | 31 | 39 | 31          | 16 | 15 |

**Supplementary Table 2: Differential gene expression results for genes closest to significant (fwerArea < 0.1) DMRs from full term analysis.** Data from GSE75010. Output is from limma topTable() function. A significance threshold of .05 was applied to Benjamini-Hochberg–corrected p–values.

| gene           | logFC  | p-value | Adjusted p-value |
|----------------|--------|---------|------------------|
| <i>C5orf63</i> | 0.0272 | 0.1562  | 0.4687           |
| <i>CDKN1C</i>  | -0.003 | 0.532   | 0.7557           |
| <i>CROT</i>    | 0.0002 | 0.9918  | 0.9918           |
| <i>ERCC6L2</i> | 0.024  | 0.0955  | 0.408            |
| <i>ERCC6L2</i> | 0.013  | 0.2208  | 0.4839           |
| <i>ERCC6L2</i> | -0.006 | 0.6543  | 0.7557           |
| <i>HOXA4</i>   | 0.0113 | 0.242   | 0.4839           |
| <i>SNCA</i>    | -0.028 | 0.102   | 0.408            |
| <i>ZBED9</i>   | 0.0035 | 0.6927  | 0.7557           |
| <i>ZNF175</i>  | 0.0105 | 0.6515  | 0.7557           |
| <i>ZNF175</i>  | 0.0051 | 0.6811  | 0.7557           |
| <i>ZNF300</i>  | -0.049 | 0.0022  | <b>0.0263</b>    |

## **Supplementary Figures**

**Supplementary Figure 1: PCA plot of full term placenta samples before and after batch effect correction.** Top triangle shows principal components generated from methylation M-values at all autosomal probes passing QC prior to quantile normalization or surrogate variable analysis. Bottom triangle shows residuals of quantile normalized autosomal M-values regressed onto estimated surrogate variables.

**Supplementary Figure 2: PCA plot of 3rd Trimester placenta samples before and after batch effect correction.** Top triangle shows principal components generated from methylation M-values at all autosomal probes passing QC prior to quantile normalization or surrogate variable analysis. Bottom triangle shows residuals of quantile normalized autosomal M-values regressed onto estimated surrogate variables.

**Supplementary Figure 3: PCA plot of 2nd Trimester placenta samples before and after batch effect correction.** Top triangle shows principal components generated from methylation M-values at all autosomal probes passing QC prior to quantile normalization or surrogate variable analysis. Bottom triangle shows residuals of quantile normalized autosomal M-values regressed onto estimated surrogate variables.

**Supplementary Figure 4: PCA plot of 1st Trimester placenta samples before and after batch effect correction.** Top triangle shows principal components generated from methylation M-values at all autosomal probes passing QC prior to quantile normalization or surrogate variable analysis. Bottom triangle shows residuals of quantile normalized autosomal M-values regressed onto estimated surrogate variables.

**Supplementary Figure 5: Exploration of fetal sex differences in placenta DNAm in different genomics regions.** **a** Density plots of % DNAm values in regions defined by proximity to CpG islands **b** Density plots of % DNAm values in regions defined by proximity to annotated regulatory features defined by ENCODE per the Illumina 450K manifest **c** Distribution of probes mapping to regions defined by proximity to CpG islands for all probes analyzed in full term analysis and probes found to be differentially methylated ( $n = 5,212$ ) in same analysis. P-value represents chi-square test evaluating significance of counts for these two groups of probes. **d** Distribution of probes mapping to regions defined by annotated regulatory features for all probes analyzed in full term analysis and probes found to be differentially methylated ( $n = 5,212$ ) in same analysis. P-value represents chi-square test evaluating significance of counts for these two groups of probes.

**Supplementary Figure 6: Additional explorations of mean difference in full term analysis.** **a** Volcano Plot **b-c** Study-specific effects of individual CpG sites showing highest degree of hypermethylation in males (cg01382982; **b**) and females (cg22905511; **c**) in the full dataset, in the full term analysis.

**Supplementary Figure 7: Distribution of absolute value of mean differences in sites that do discriminate placenta cell types (gray,  $n = 1,285$ ) and sites that do not (orange,  $n = 3927$ ), among the genome-wide significant sites from the full term analysis.** Cell type discriminating probes determined by Yuan et al.

**Supplementary Figure 8: Manhattan plots showing single site association results for each early term analysis.** In each plot, top half restricted to sites hypermethylated in males, bottom half restricted to sites hypermethylated in females. Orange line represents threshold of  $1E-8$ , the considered cutoff for genome-wide significance.

**Supplementary Figure 9: Volcano plot for full term DMR analysis.** The x-axis measures the average methylation difference between male and female fetuses, and the y-axis measures the size of the DMR in base pairs. The blue points represent DMRs considered significant ( $fwerArea < 0.1$ )

**Supplementary Figures 10 - 17: Additional plots depicting significant DMRs from full term analysis across all gestational periods.** Remaining DMRs exceeding  $fwerArea$  threshold of 0.1 as seen in Table 4 (excluding top-ranked DMR in ZNF175 promoter, see Figure 4). In each figure, DMRs are plotted as percent methylation as a function of genomic position. Dots indicate samples and solid lines indicate smooth lines through male sample values (blue) and female sample values (gold). Actual identified DMR region indicated via dashed lines. **a** Full Term Samples. **b** 1st Trimester Samples **c** 2nd Trimester Samples **d** 3rd Trimester Samples.

**Supplementary Figures 18 - 21: Exploration of cell type heterogeneity in additional DMRs.** Remaining DMRs containing cell type discriminating probes as determined by Yuan et al (see Table 4). DMRs are plotted as percent methylation as a function of genomic position. Dots indicate samples and solid lines indicate smooth lines through male sample values (blue) and female sample values (gold). Actual identified DMR region indicated via dashed lines. **a** DMR identified in full term analysis, plotted using full term samples from present study. **b - d** The same region, but plotted using samples from different datasets. **b** Term samples and individual placenta cell types from Yuan et al. **c** 1st Trimester samples from present study. **d** 1st trimester samples and individual placenta cell types from Yuan et al. In **b + d**, fractions indicate the proportion of probes in the region that were annotated by Yuan et al. as distinguishing that cell type in full term and 1st trimester samples, respectively. Villi samples were not evaluated in this manner by Yuan et al. as this is the unsorted bulk tissue.

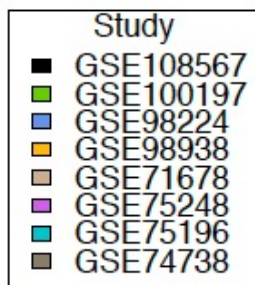

Pre batch correction

Post batch correction

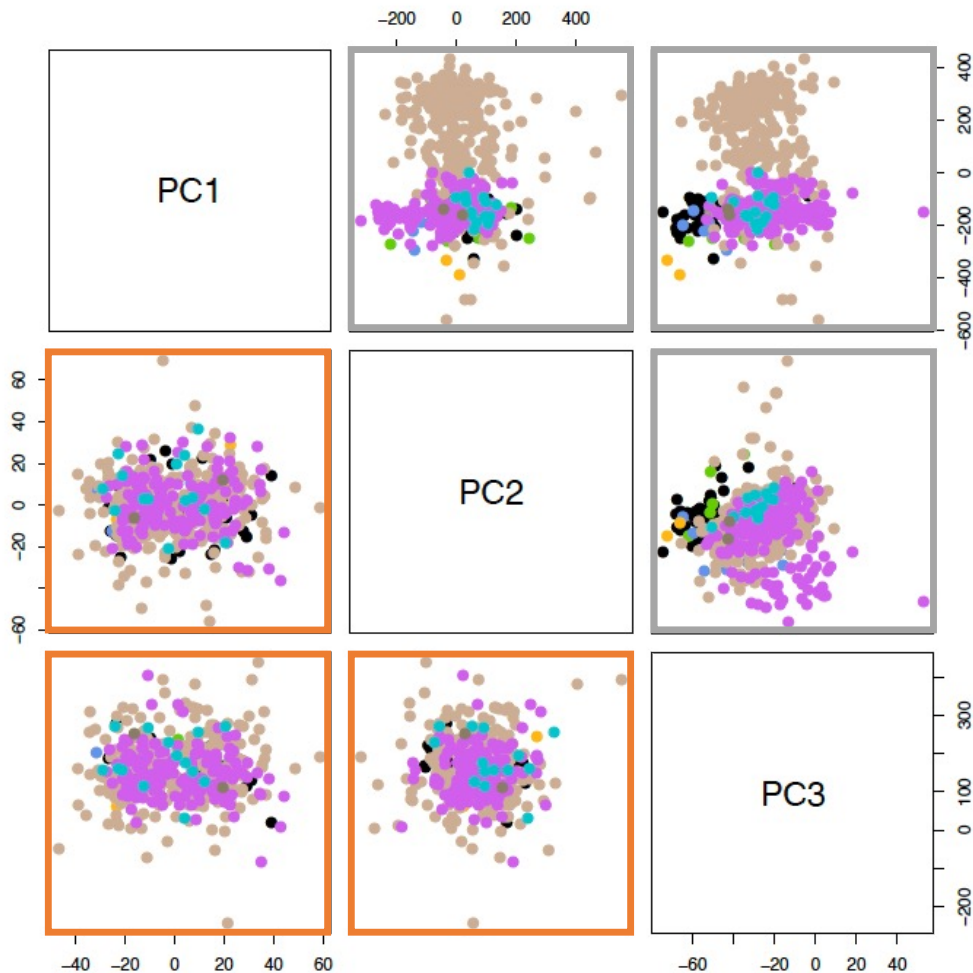

Supplementary Figure 2

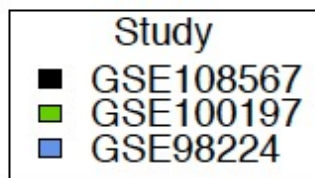

Pre batch correction

Post batch correction

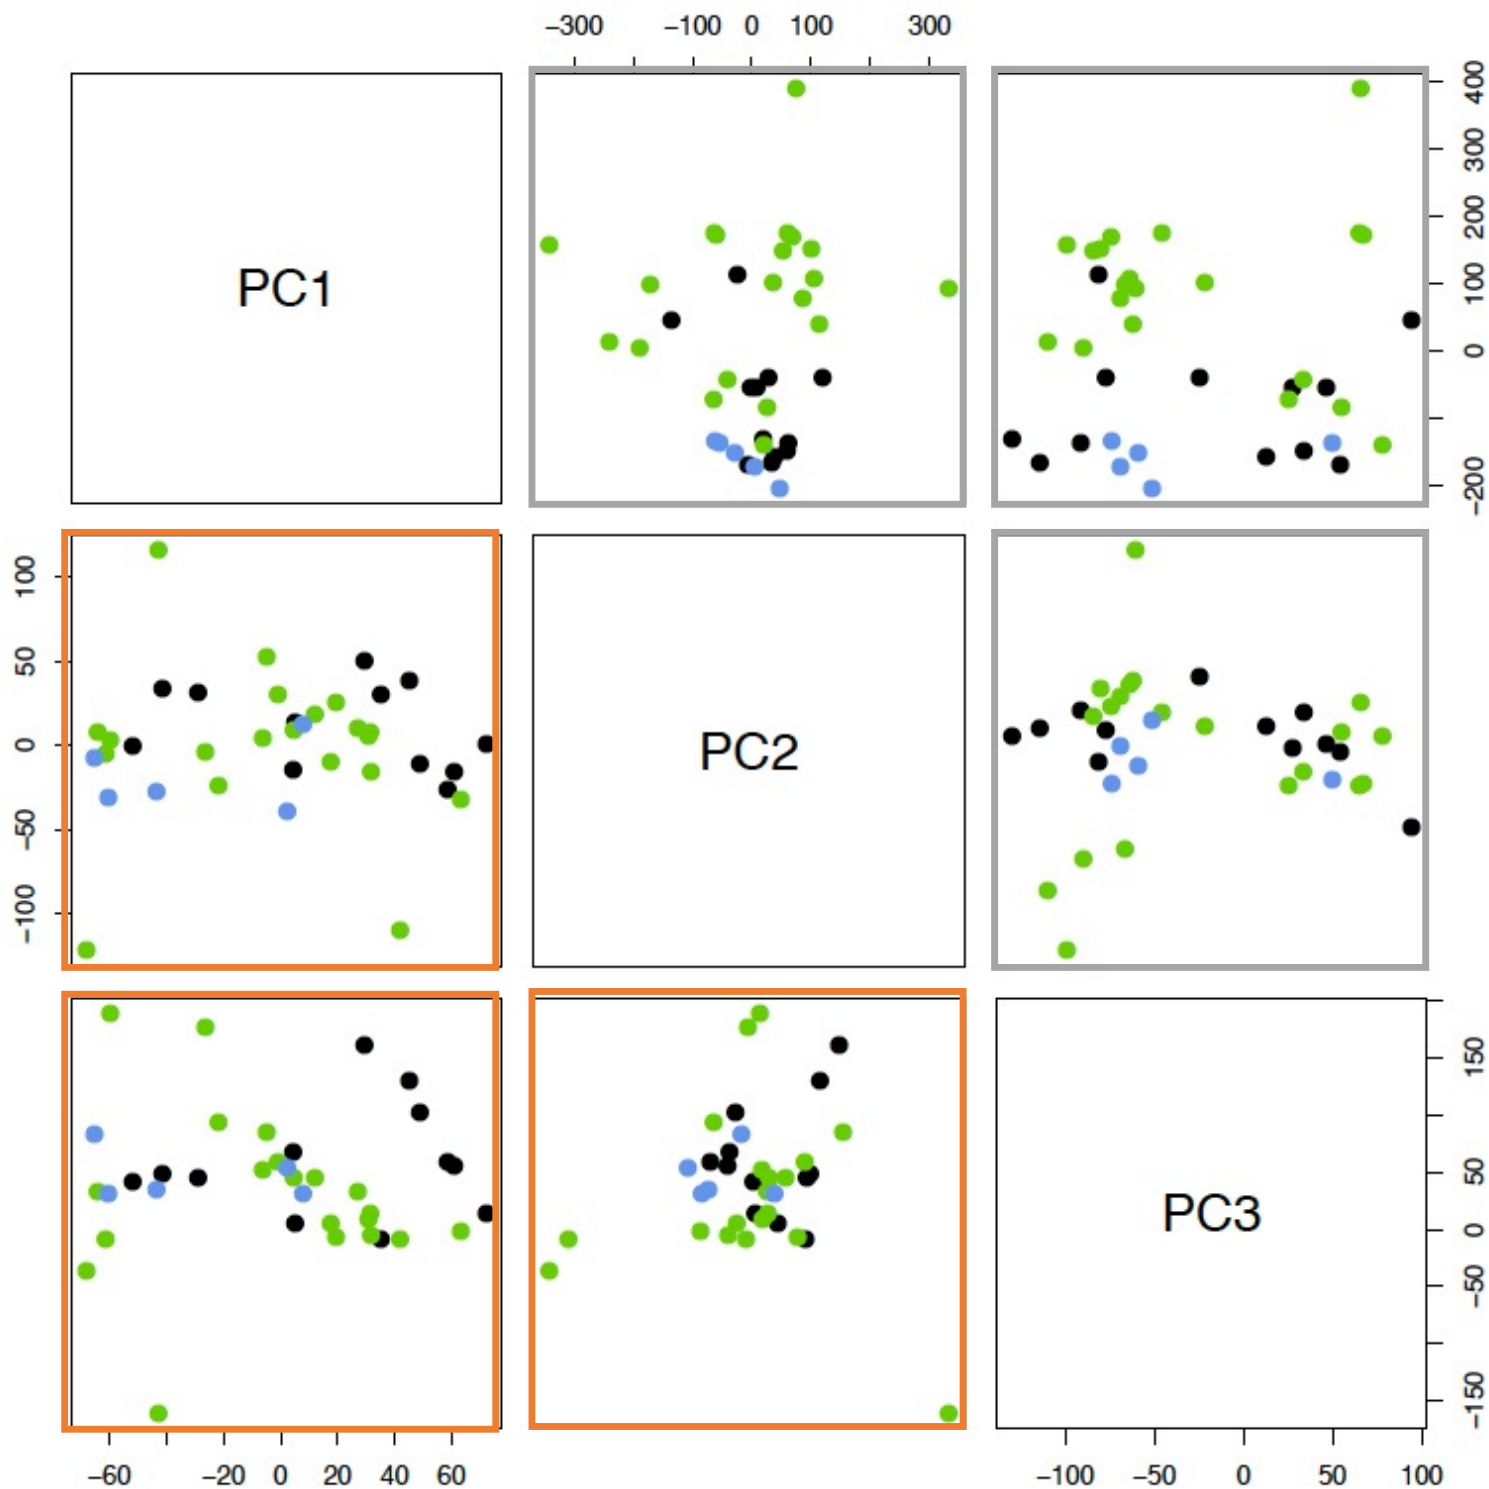

Supplementary Figure 3

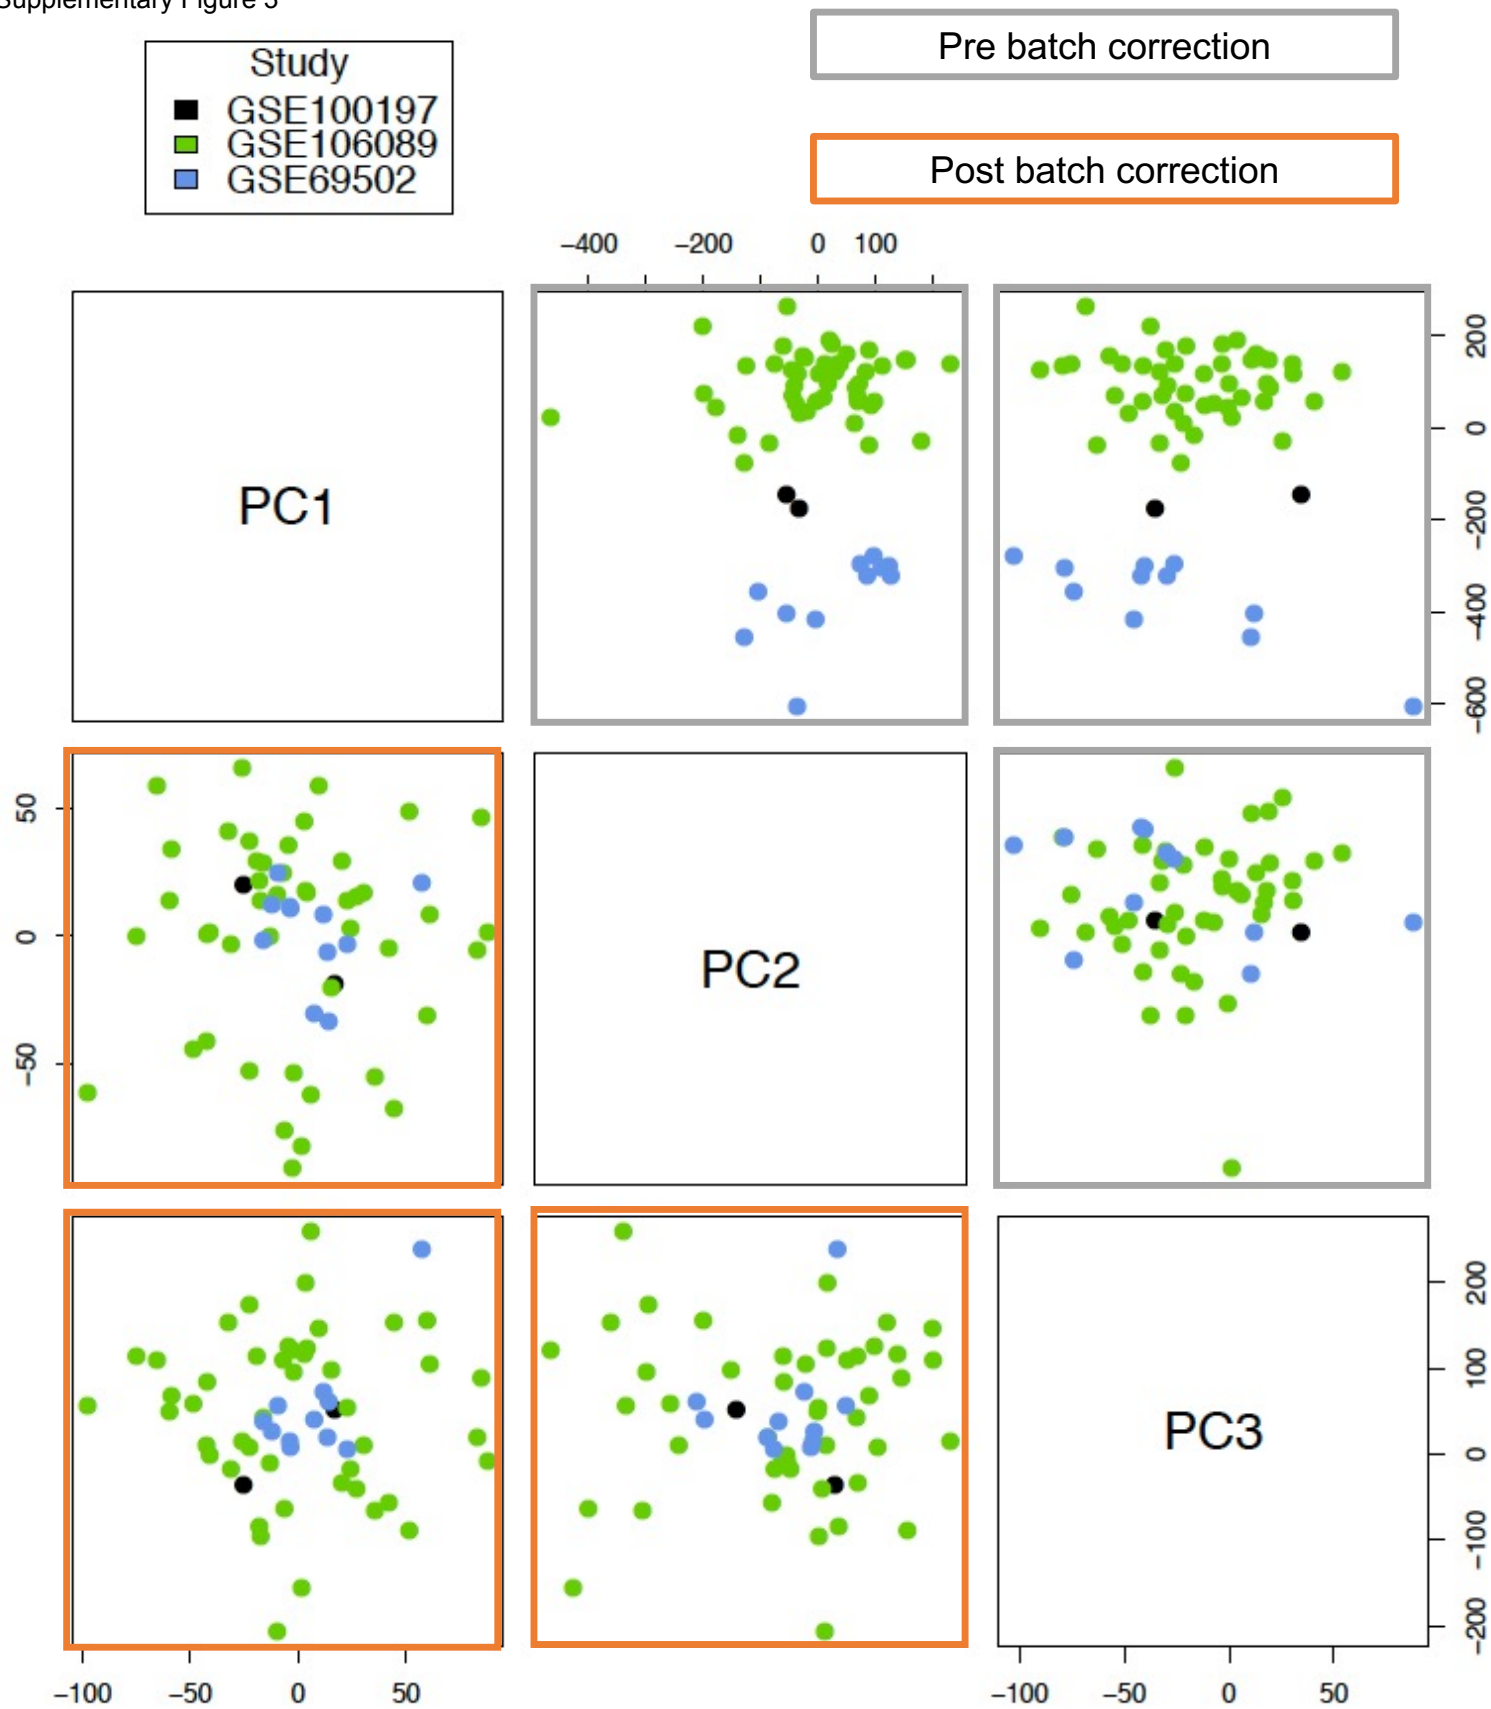

Supplementary Figure 4

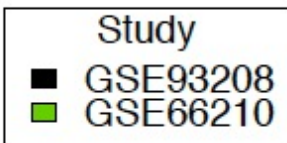

Pre batch correction

Post batch correction

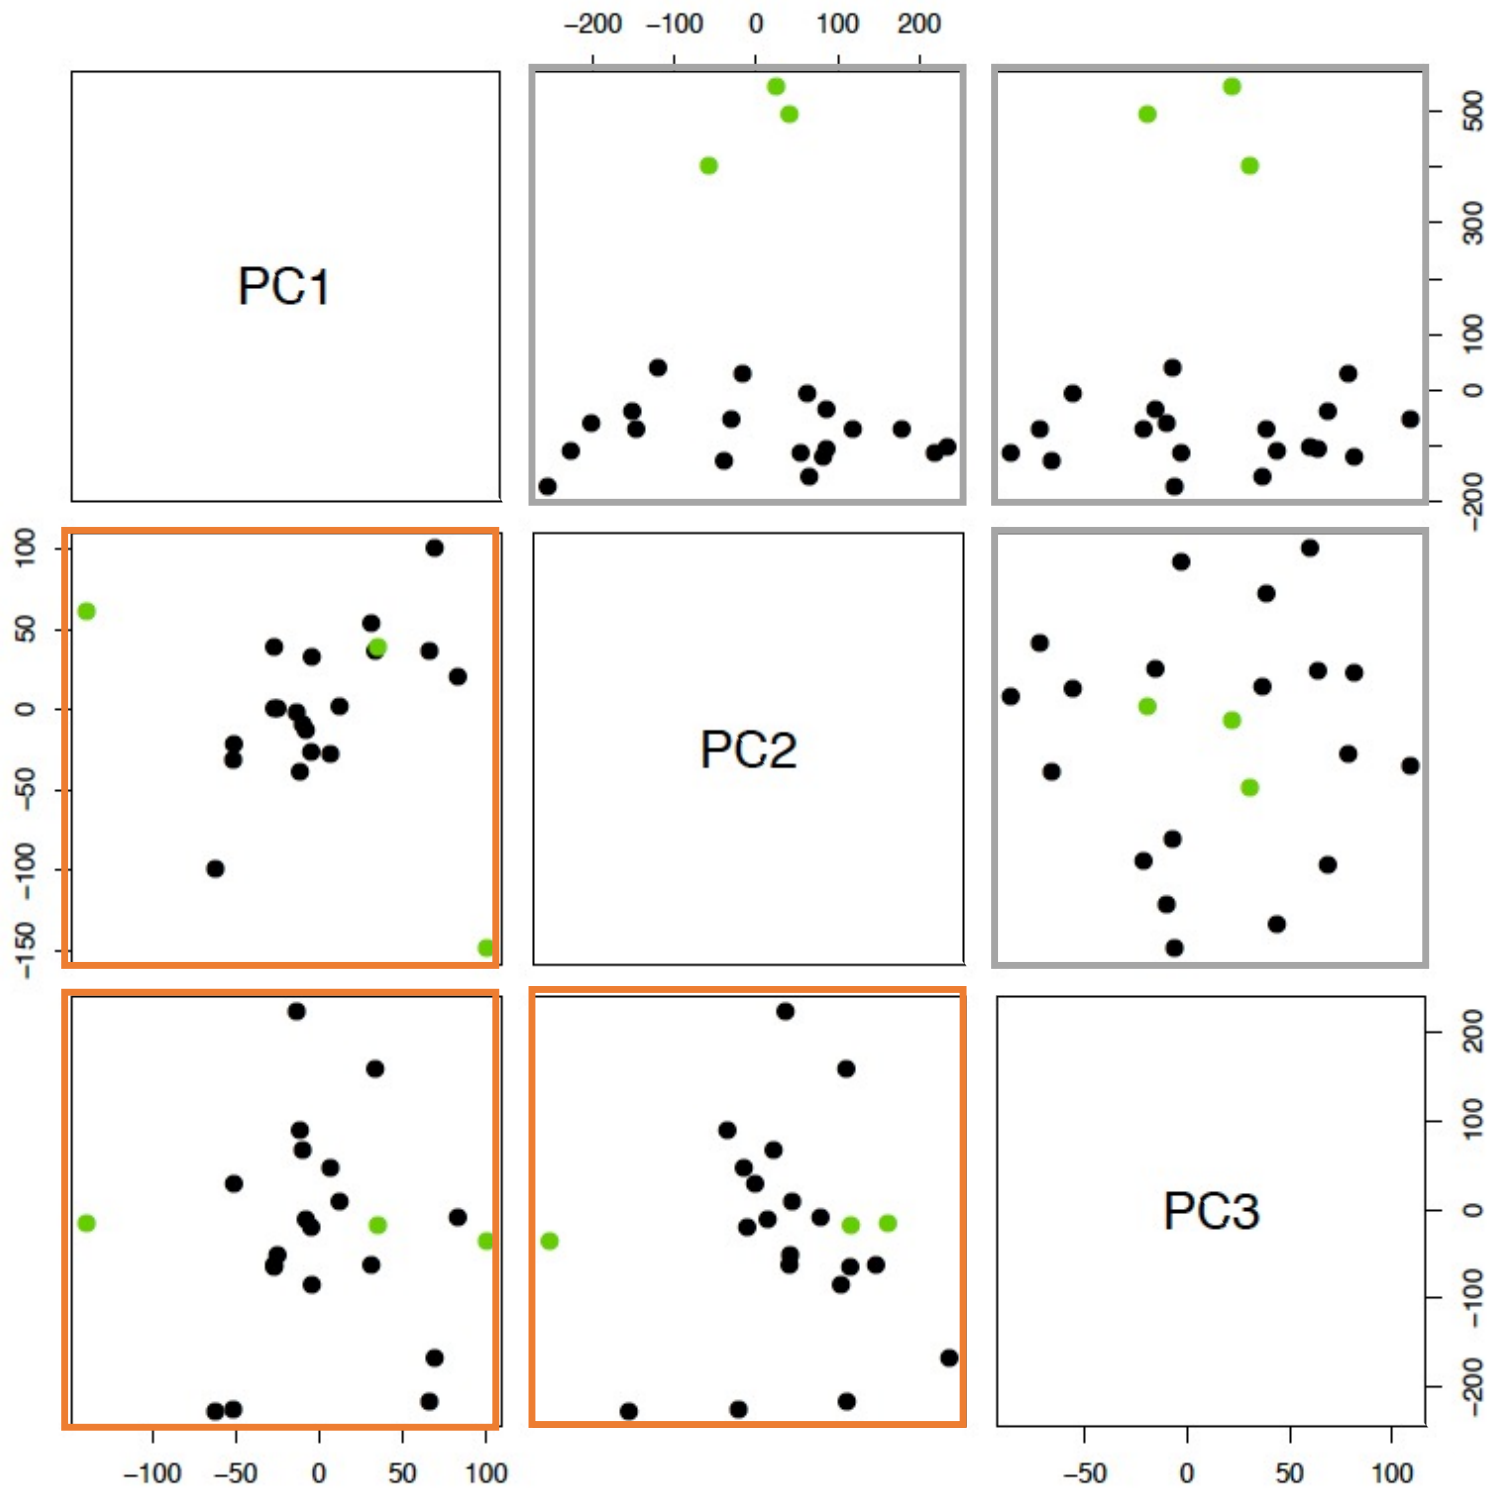



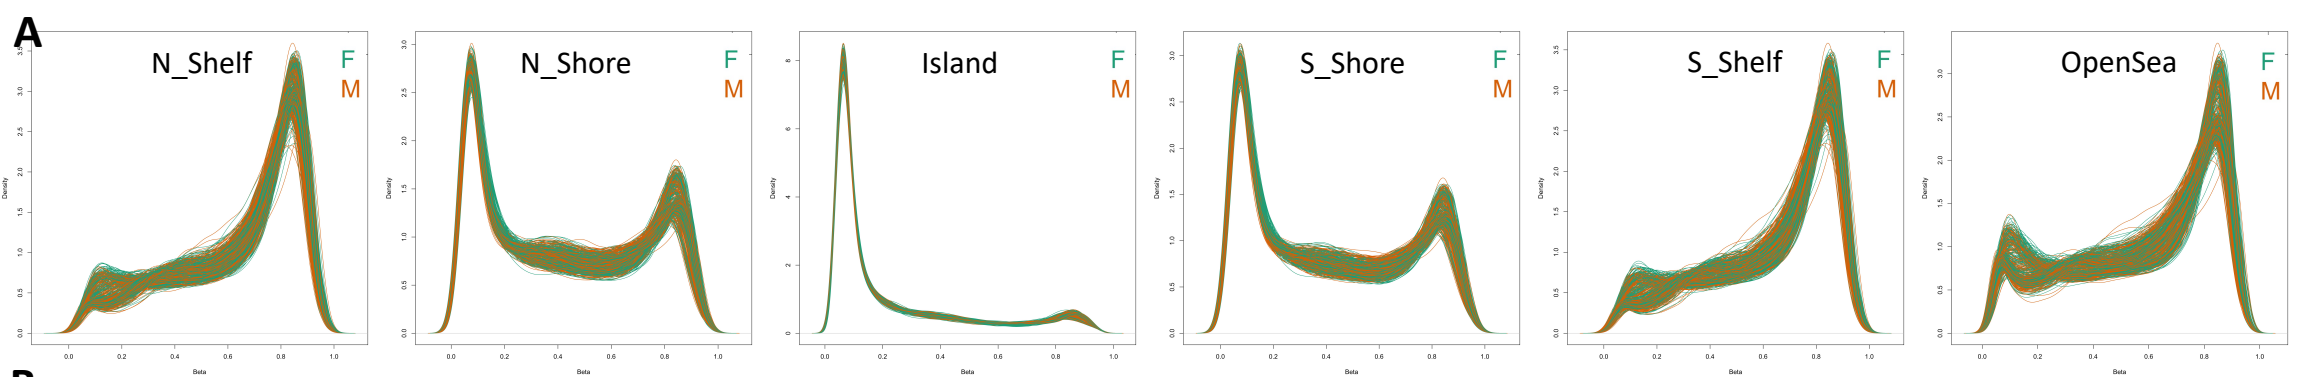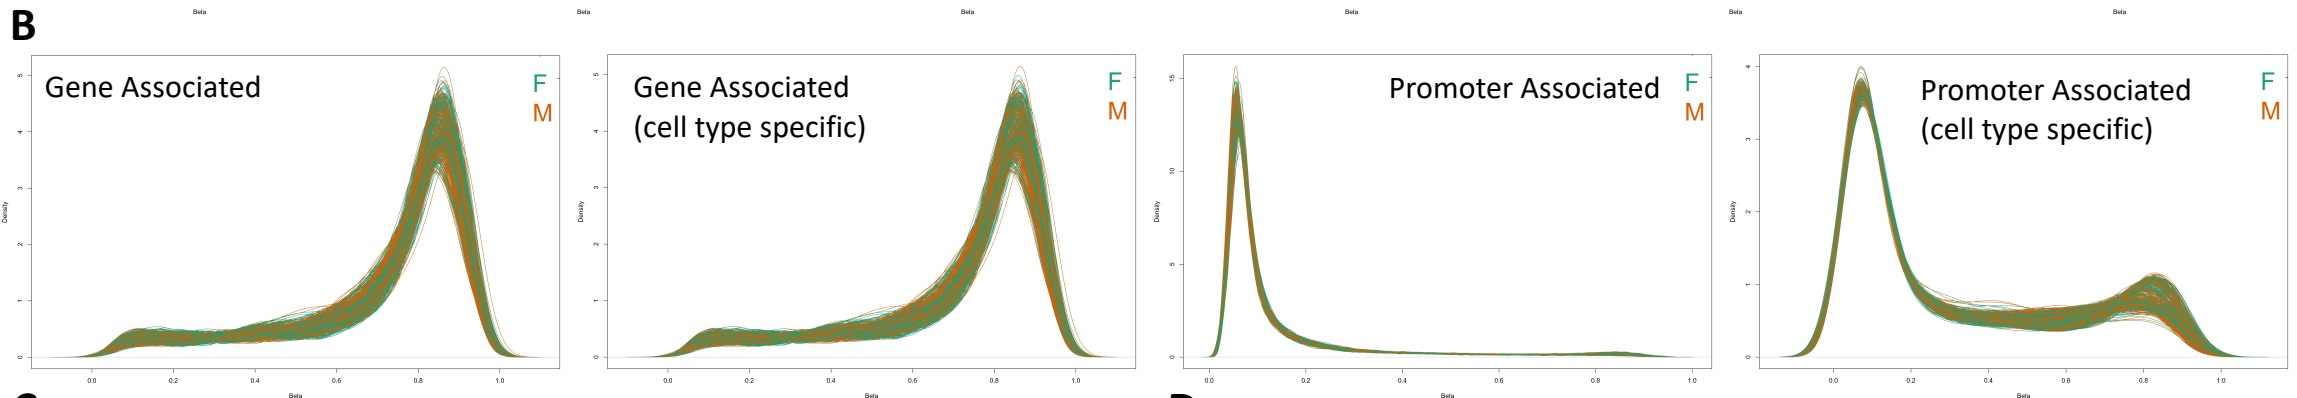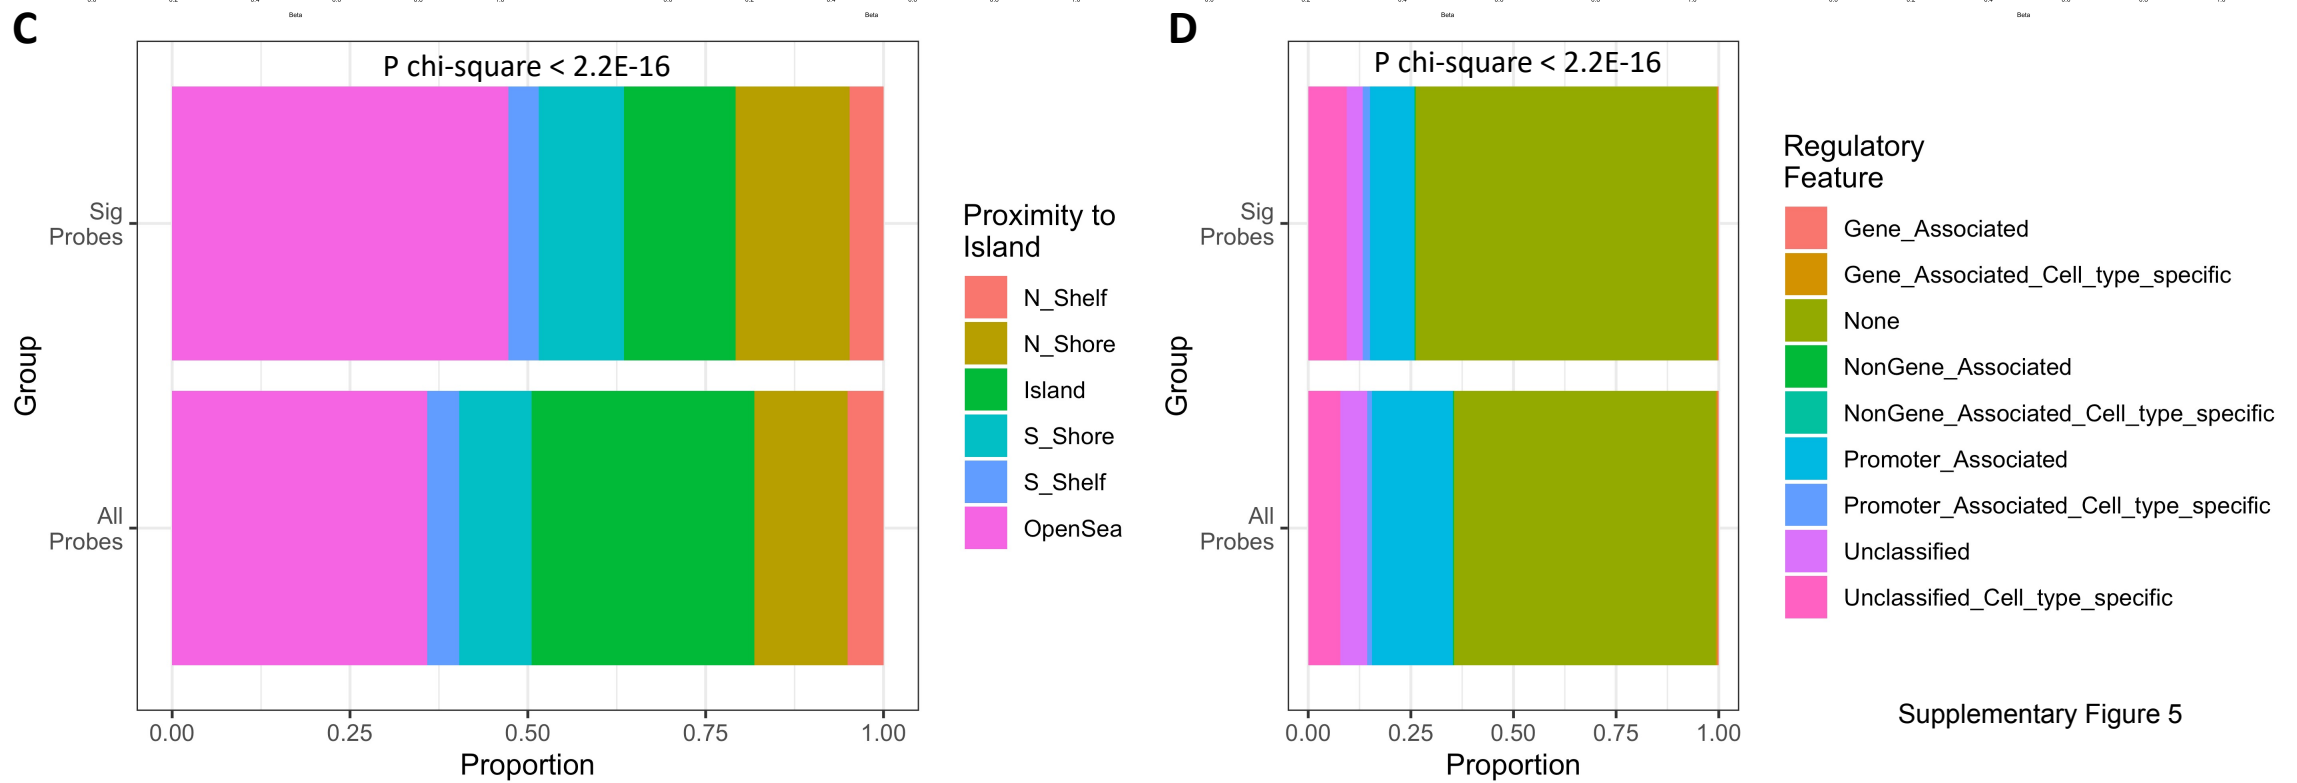

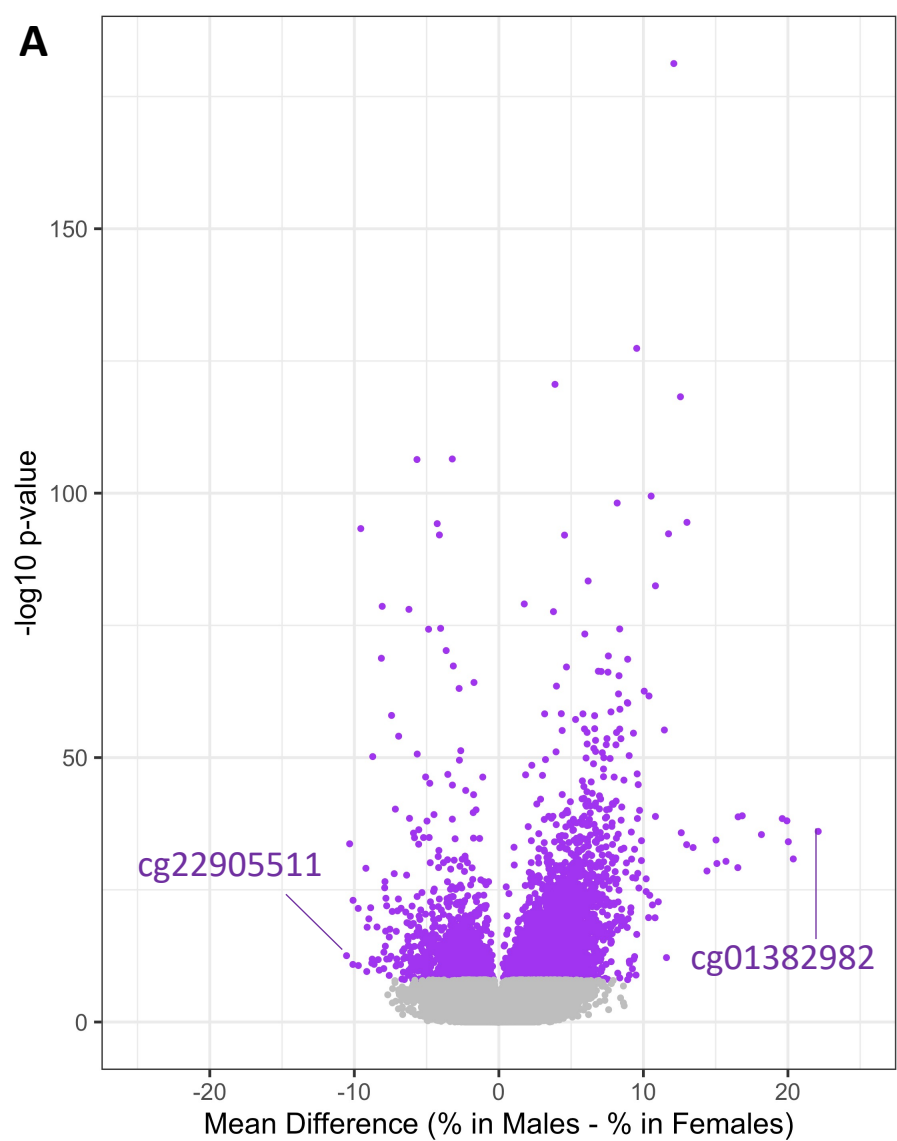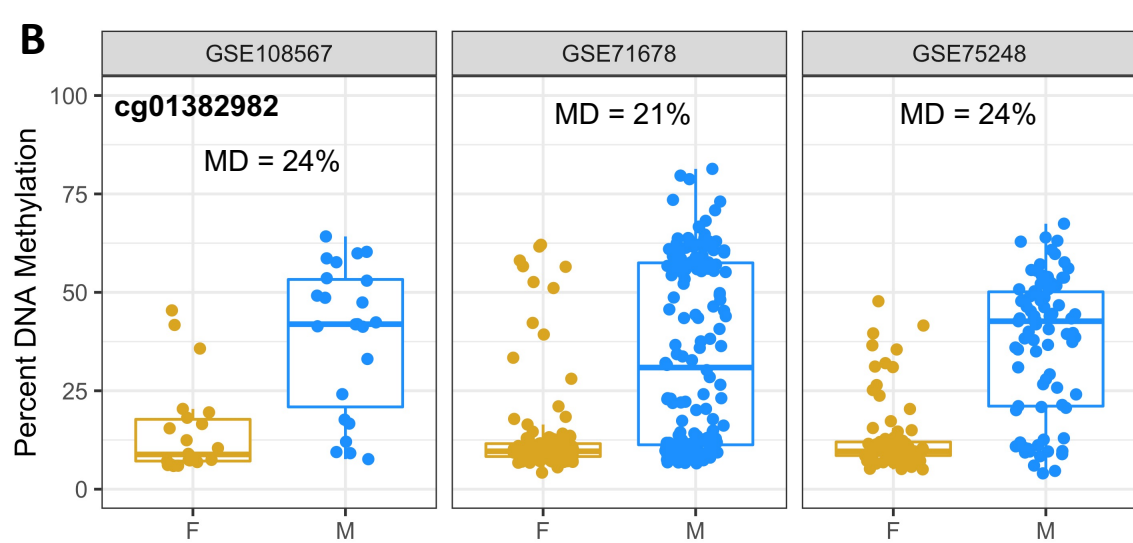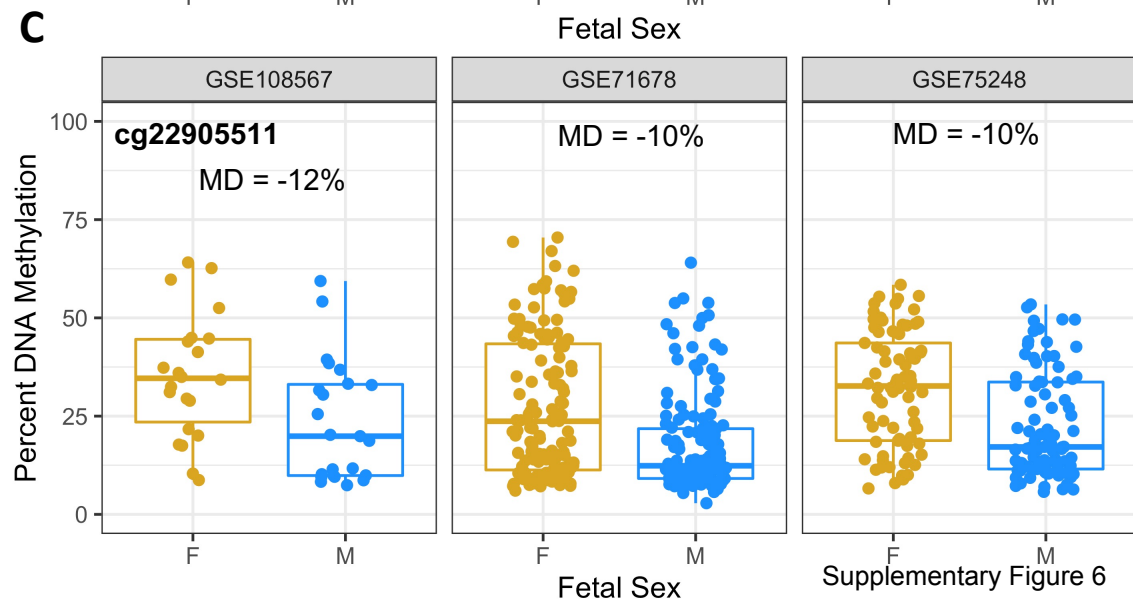

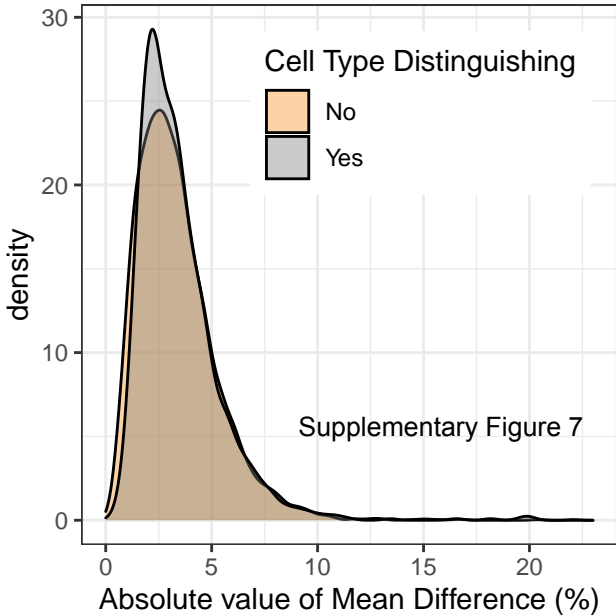

**A****Trimester 1**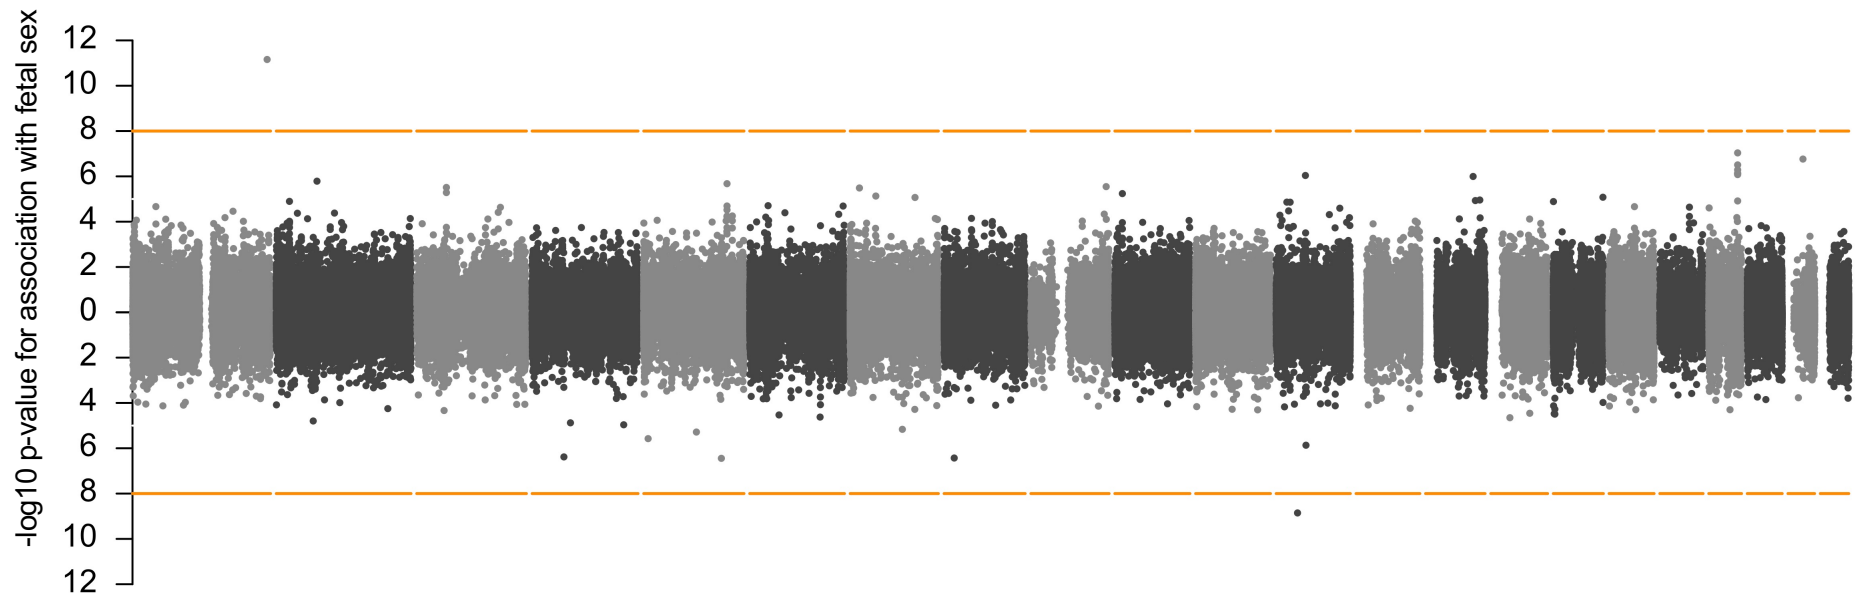**B****Trimester 2**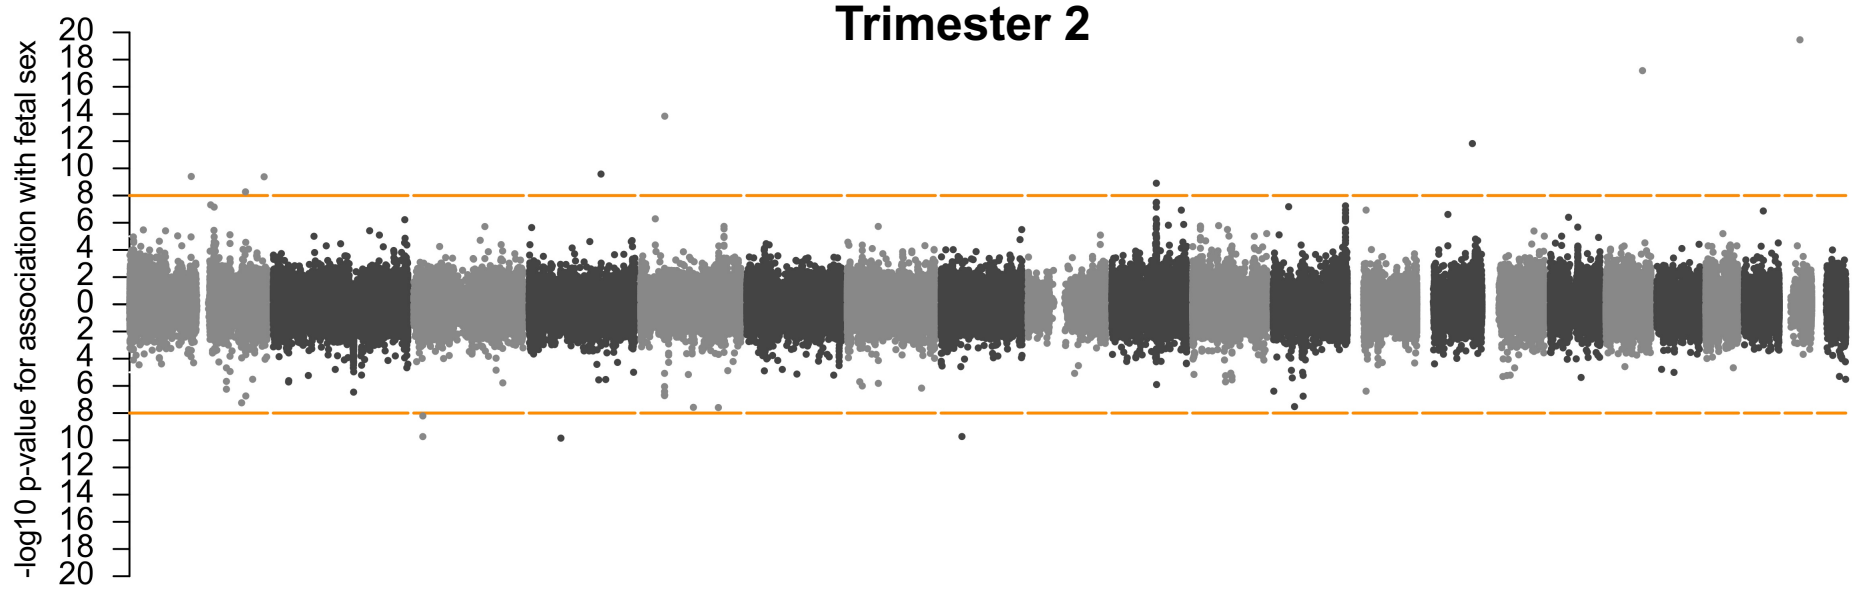**C****Trimester 3**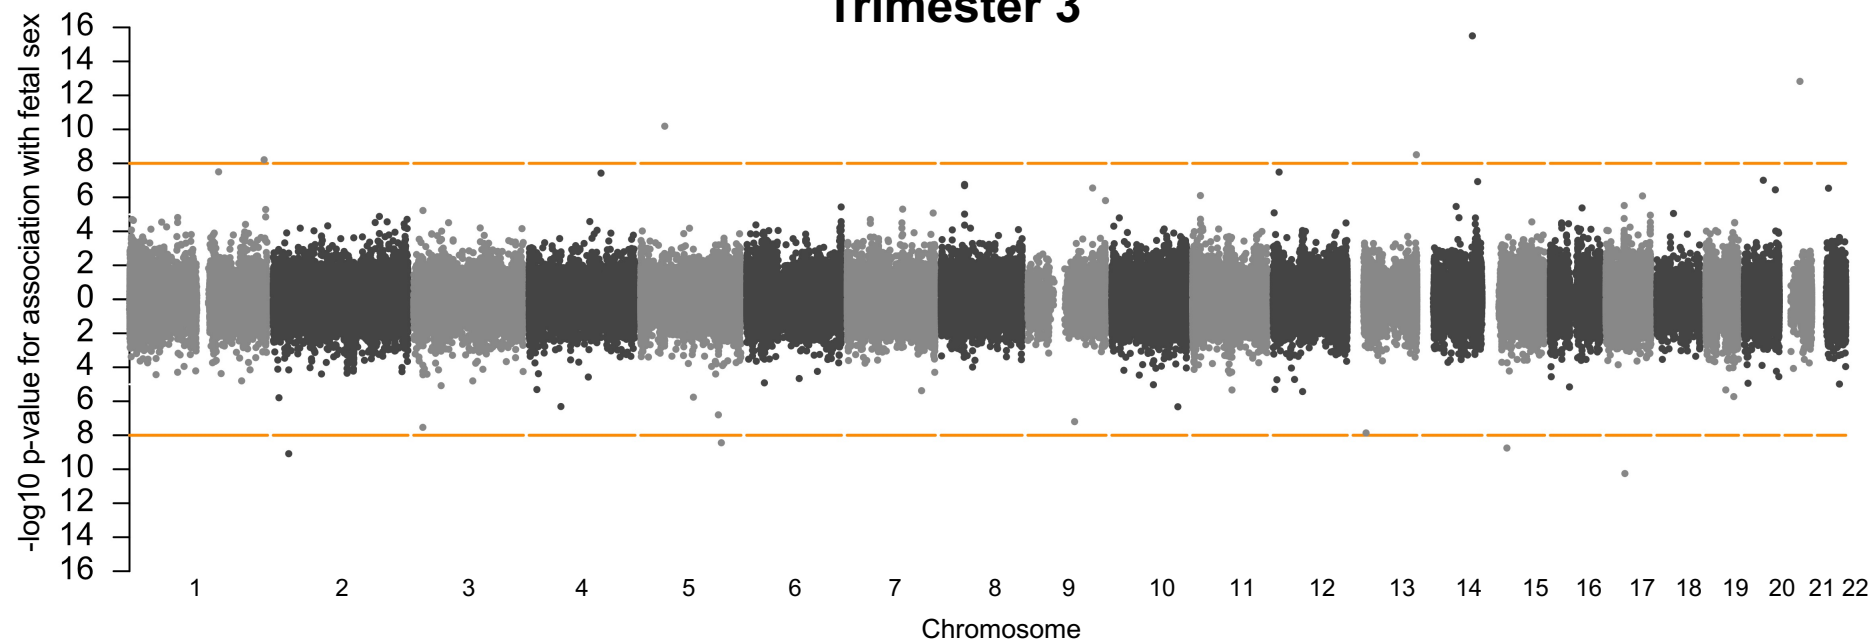

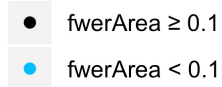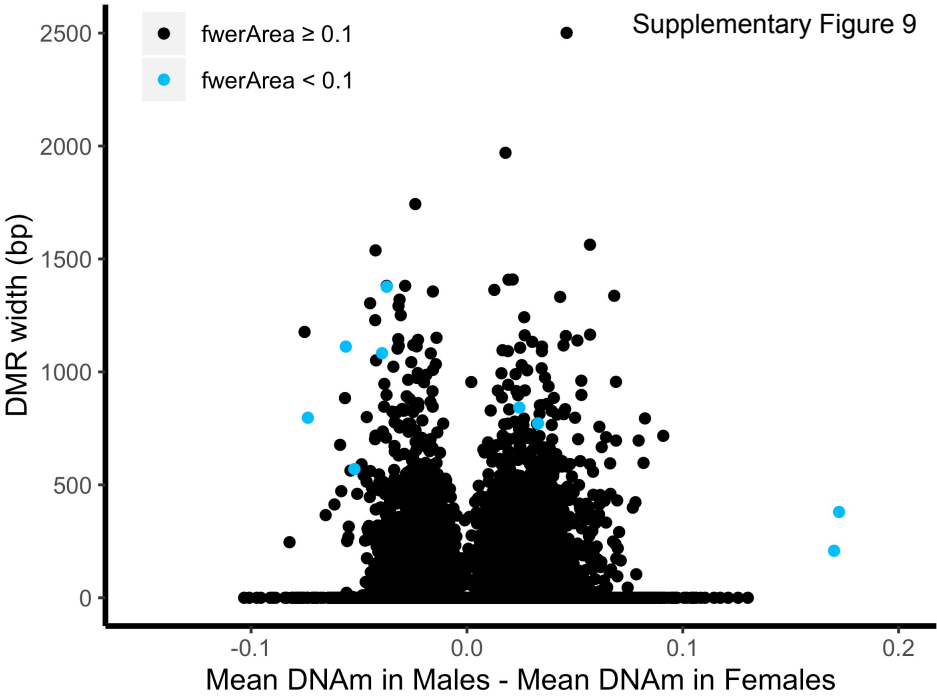

**A** Supplementary Figure 10

Fetal Sex — F — M

Full Term Samples

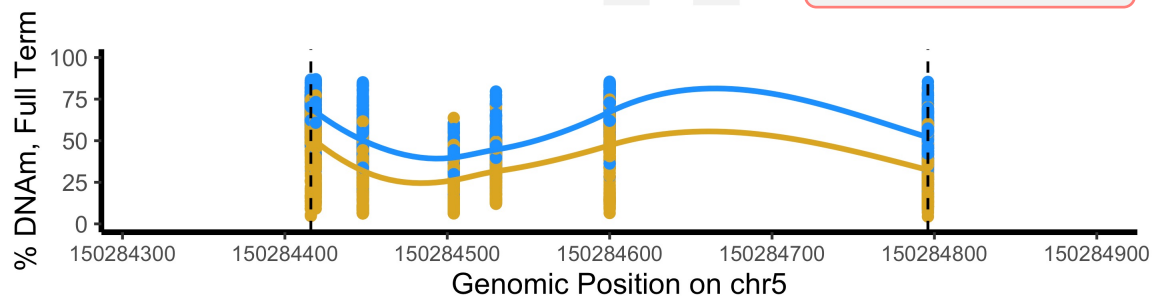**B**3<sup>rd</sup> Trimester Samples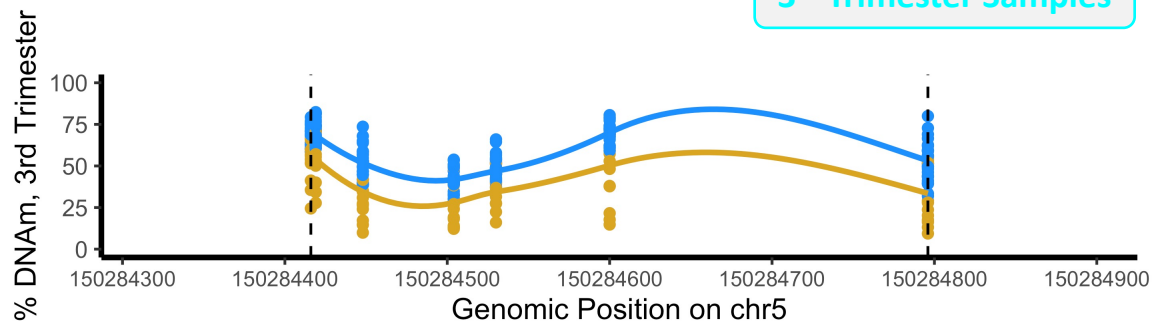**C**2<sup>nd</sup> Trimester Samples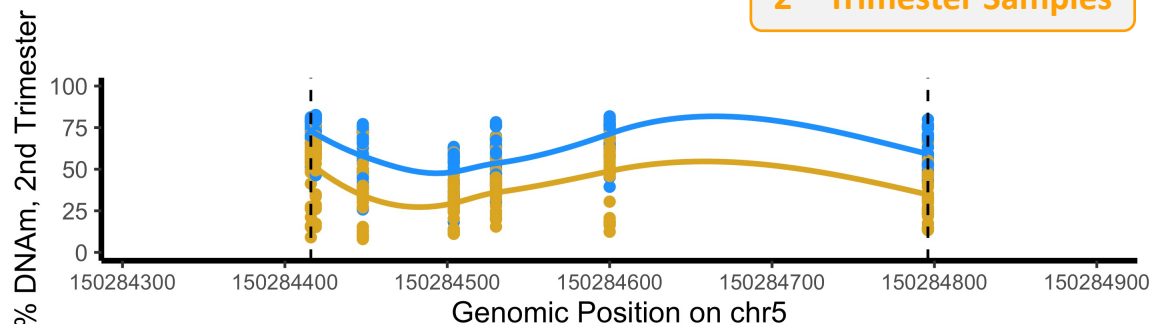**D**1<sup>st</sup> Trimester Samples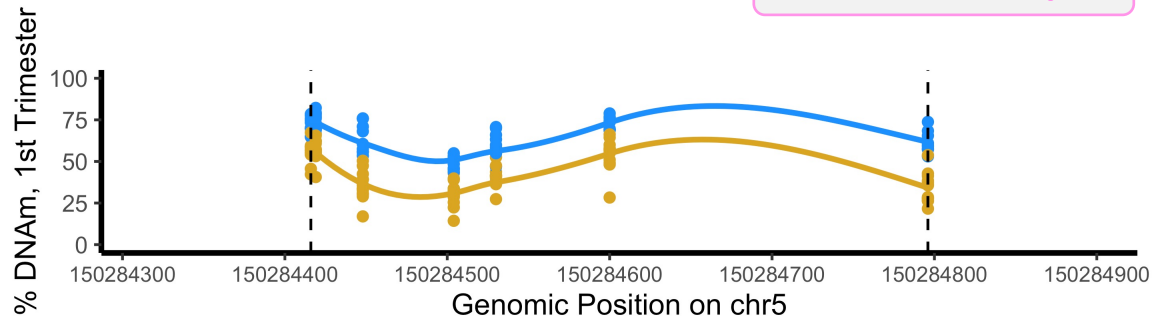 *ZNF300*

chr5

Fetal Sex F M

Full Term Samples

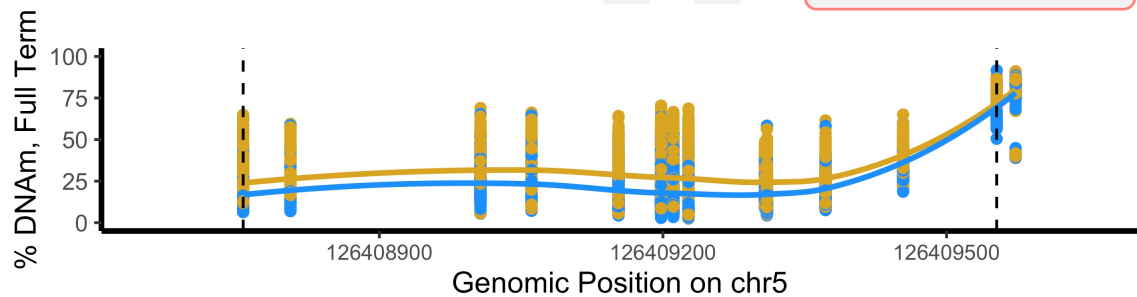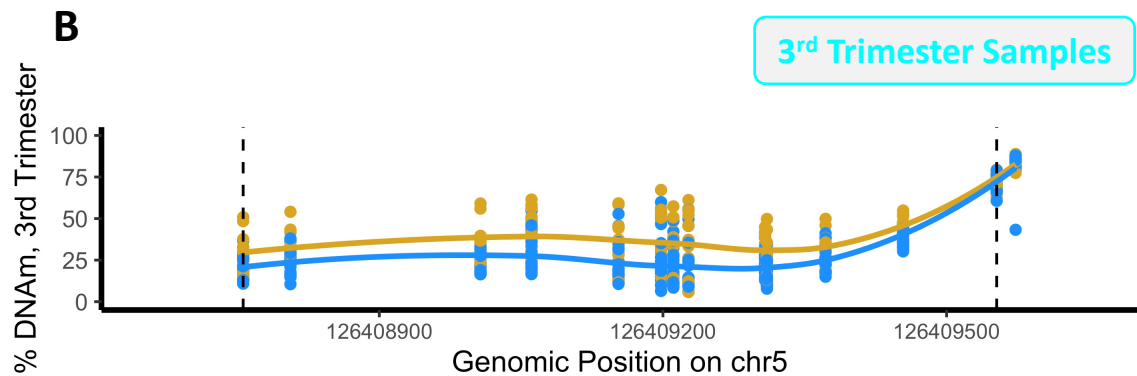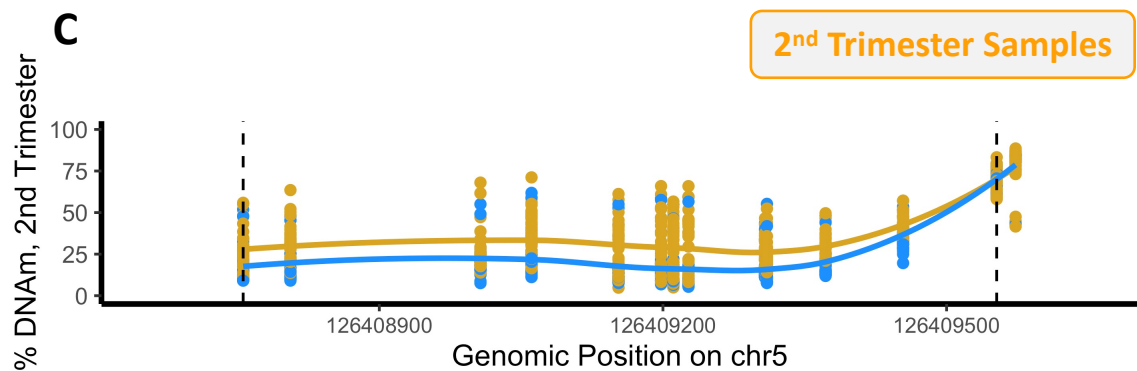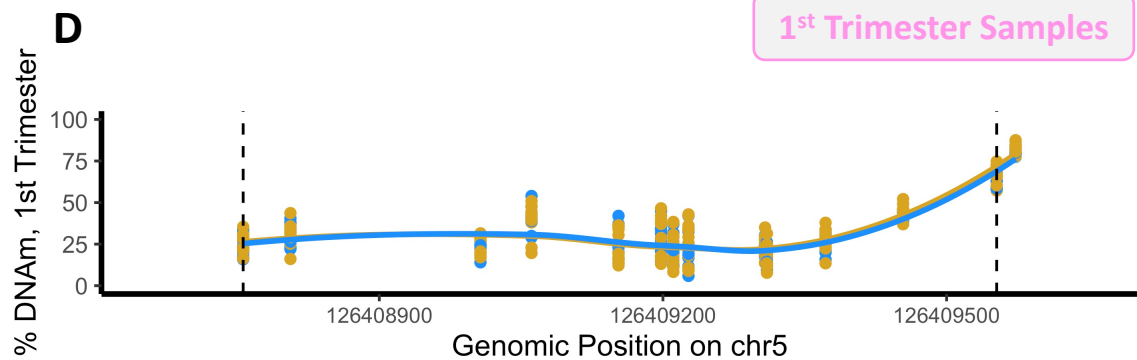

*C5orf63*

chr5

**A** Supplementary Figure 12Fetal Sex ● F ● M

Full Term Samples

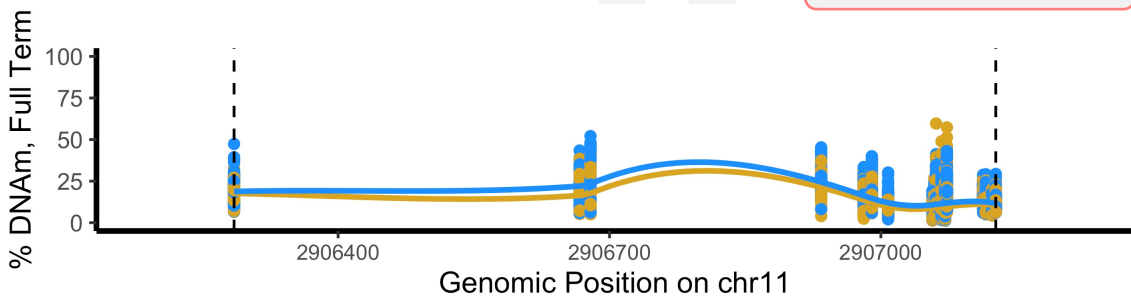**B**3<sup>rd</sup> Trimester Samples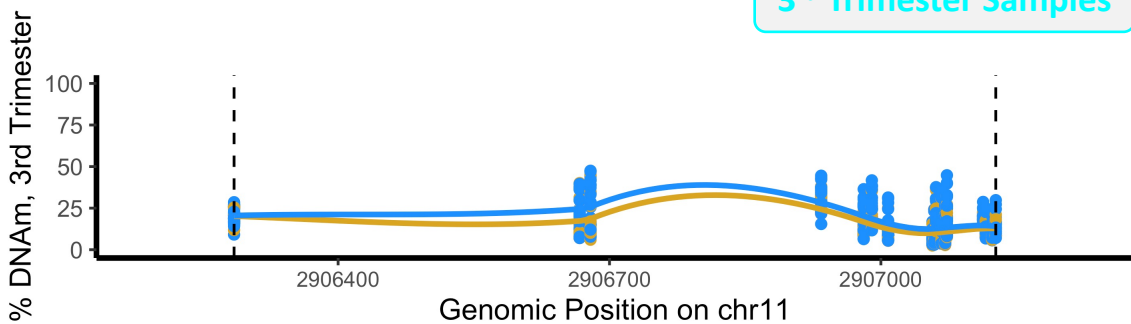**C**2<sup>nd</sup> Trimester Samples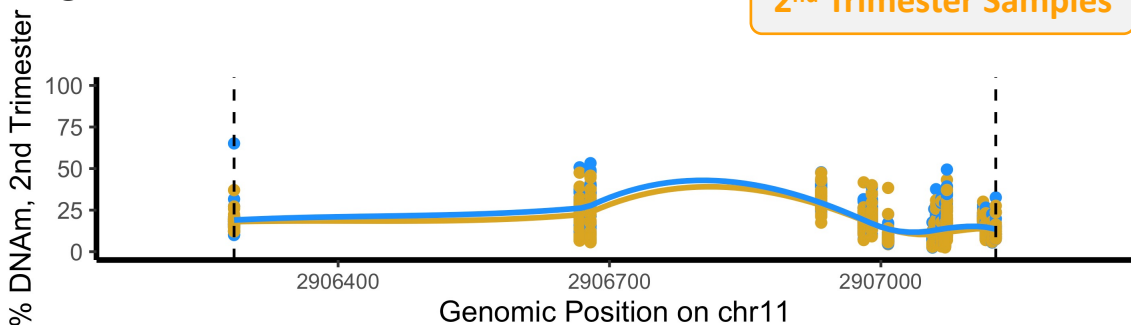**D**1<sup>st</sup> Trimester Samples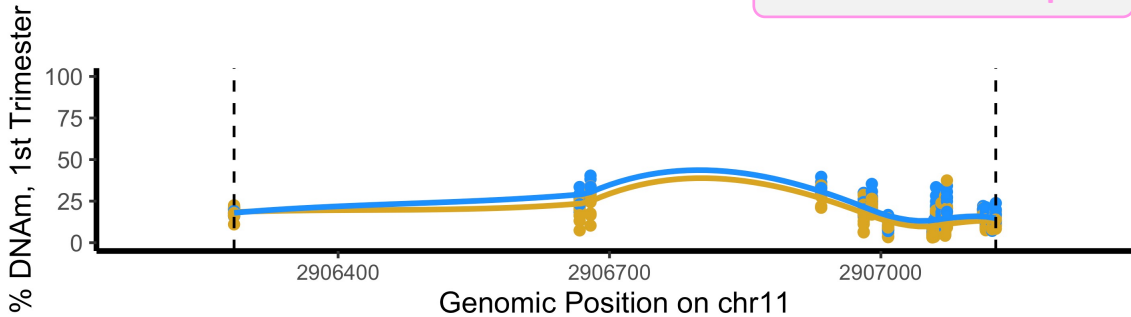

*CDKN1C*

chr11



**A** Supplementary Figure 13

Fetal Sex F M

Full Term Samples

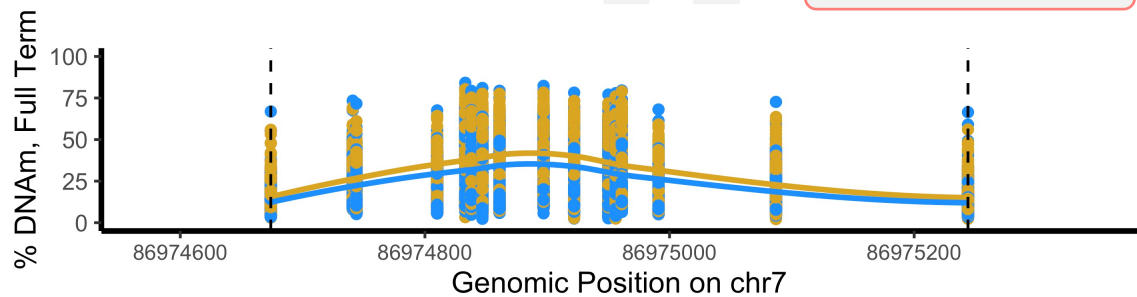**B**3<sup>rd</sup> Trimester Samples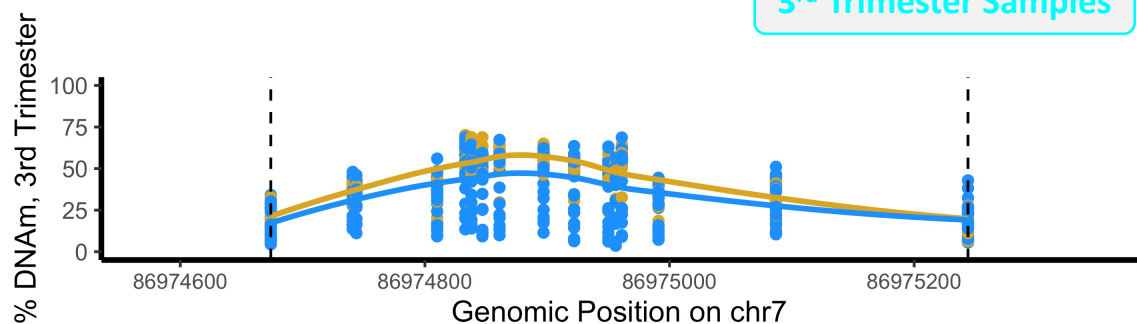**C**2<sup>nd</sup> Trimester Samples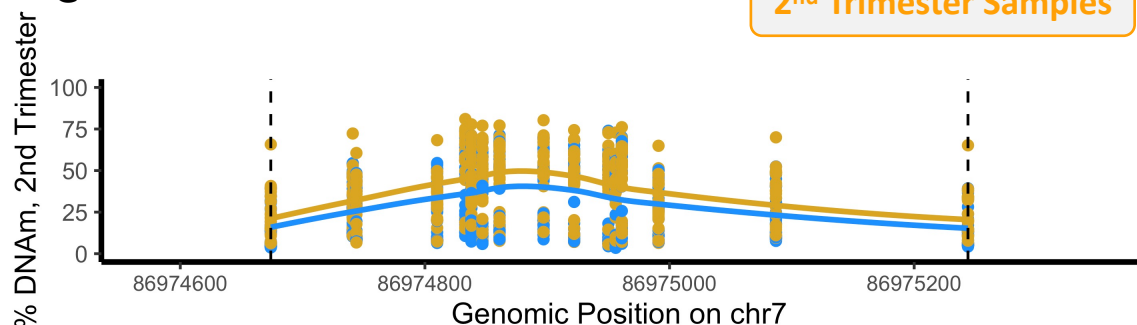**D**1<sup>st</sup> Trimester Samples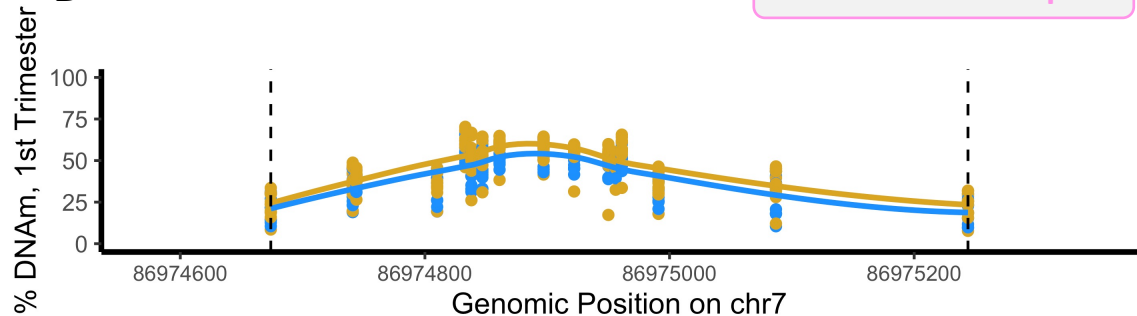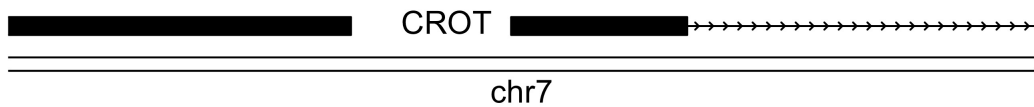

**A** Supplementary Figure 14Fetal Sex ● F ● M

Full Term Samples

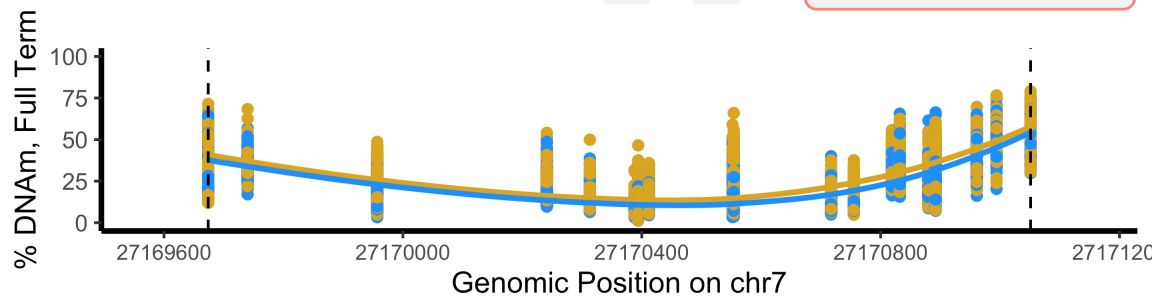**B**3<sup>rd</sup> Trimester Samples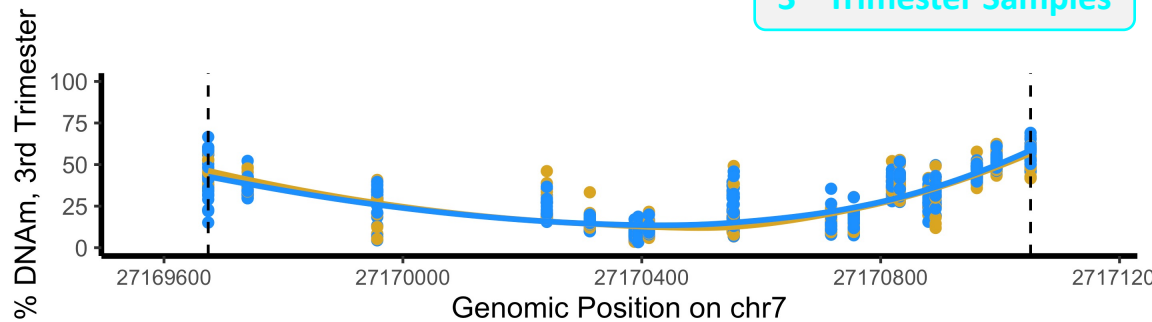**C**2<sup>nd</sup> Trimester Samples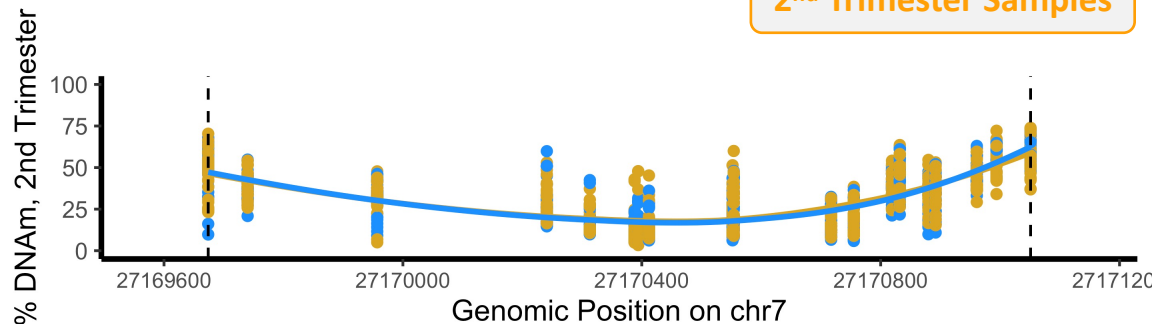**D**1<sup>st</sup> Trimester Samples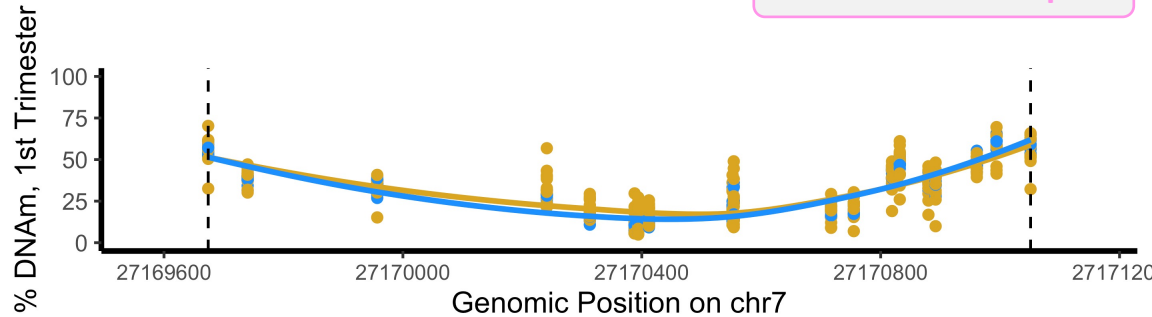

*HOXA4*

chr7

**A** Supplementary Figure 15Fetal Sex ● F ● M

Full Term Samples

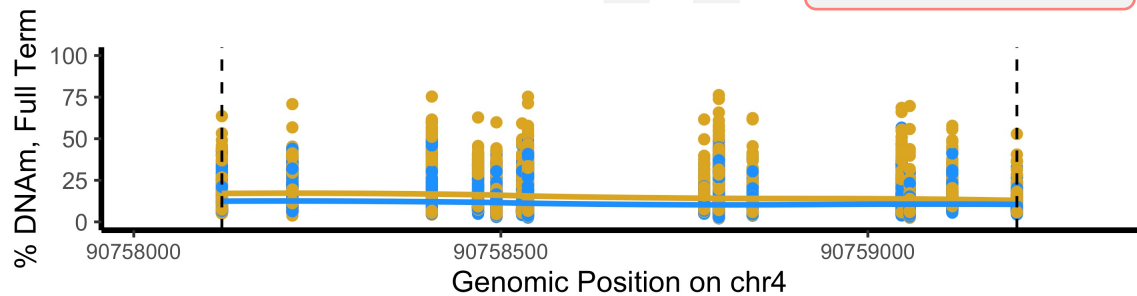**B**3<sup>rd</sup> Trimester Samples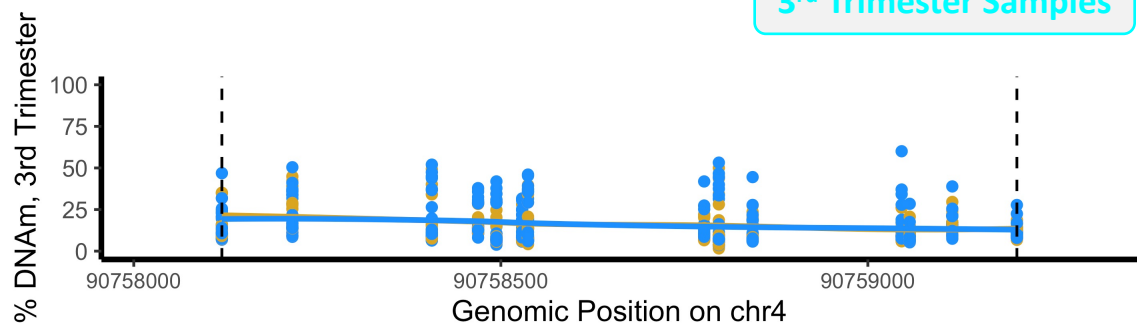**C**2<sup>nd</sup> Trimester Samples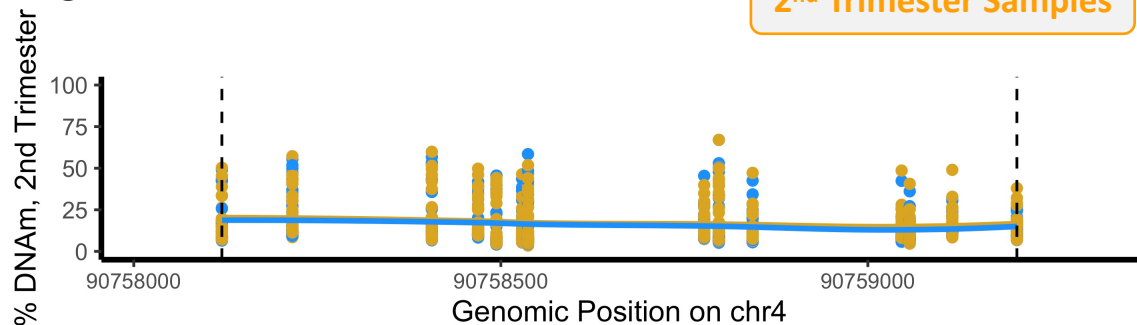**D**1<sup>st</sup> Trimester Samples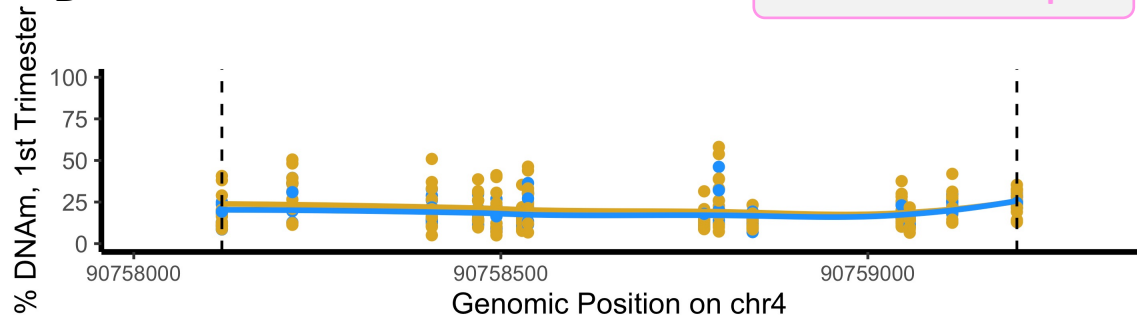

SNCA

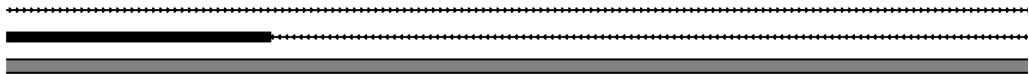

chr4

**A** Supplementary Figure 16Fetal Sex ● F ● M

Full Term Samples

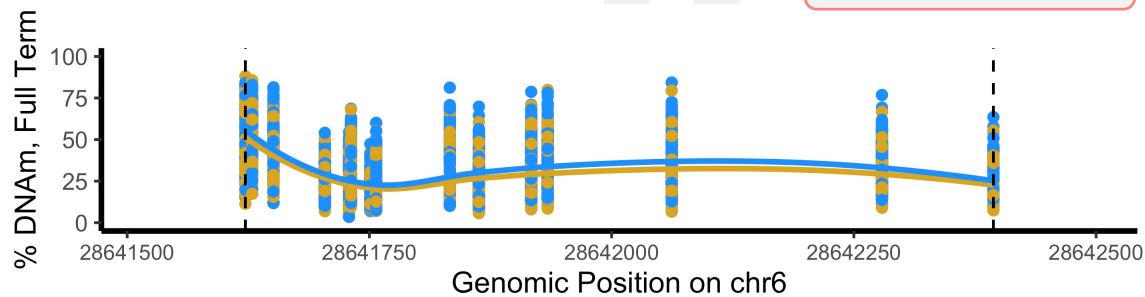**B**3<sup>rd</sup> Trimester Samples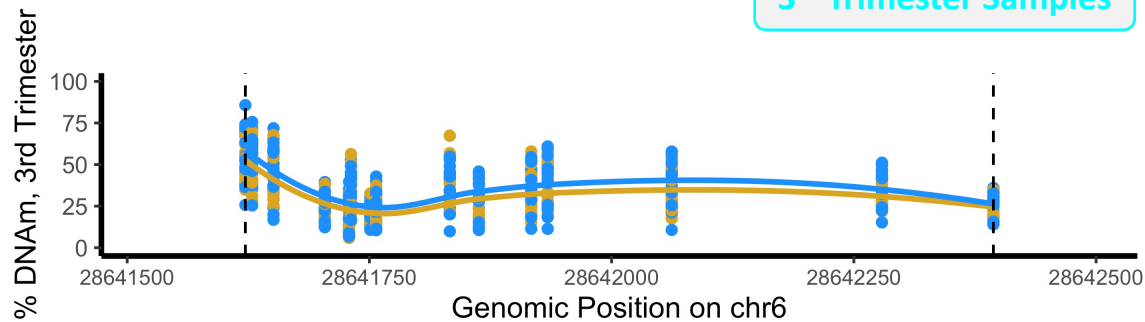**C**2<sup>nd</sup> Trimester Samples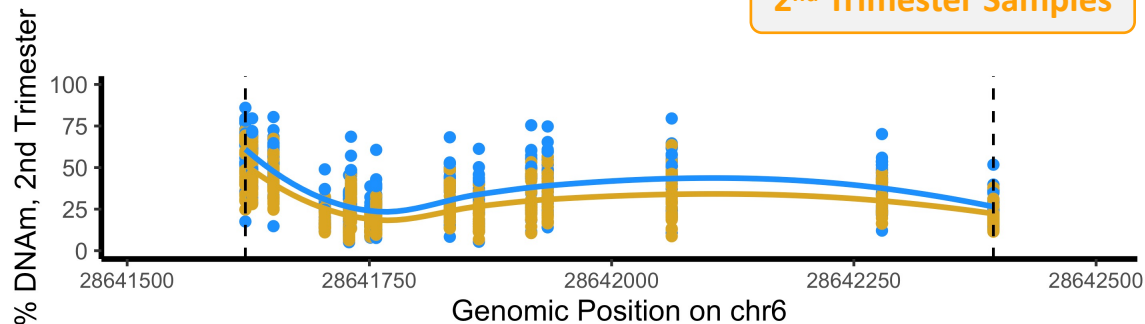**D**1<sup>st</sup> Trimester Samples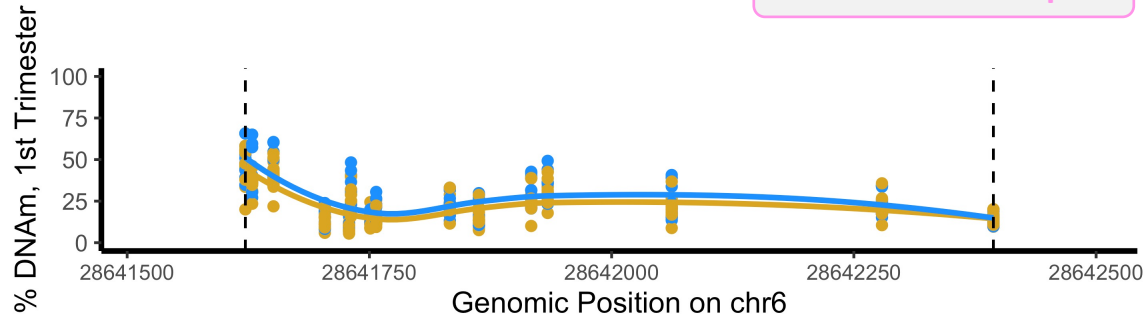

chr6

Fetal Sex F M

Full Term Samples

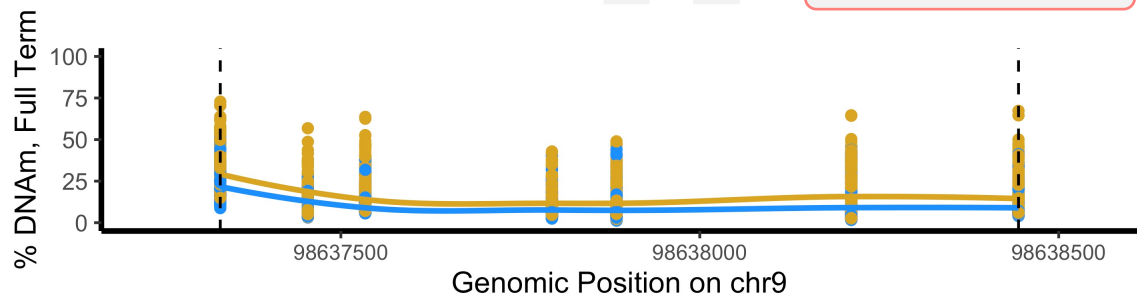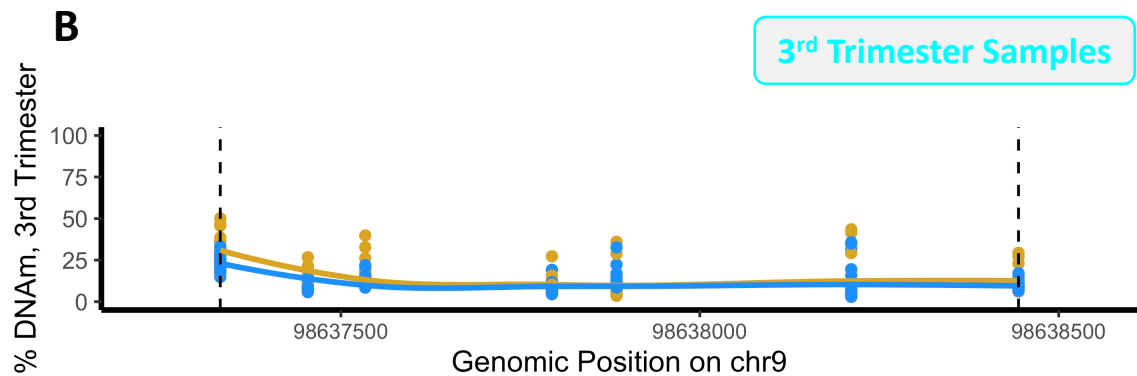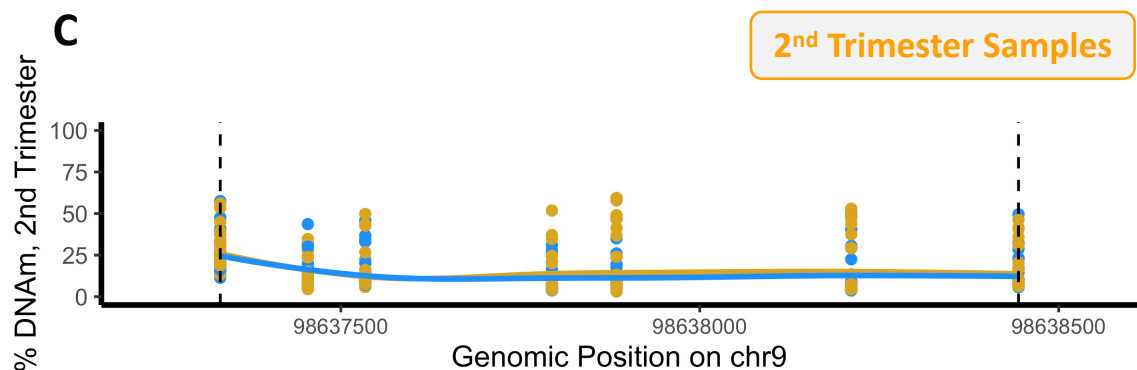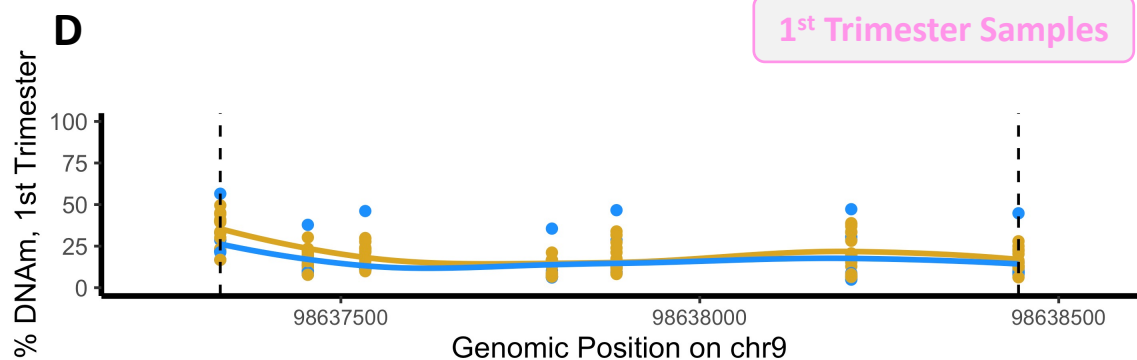

ERCC6L2

chr9

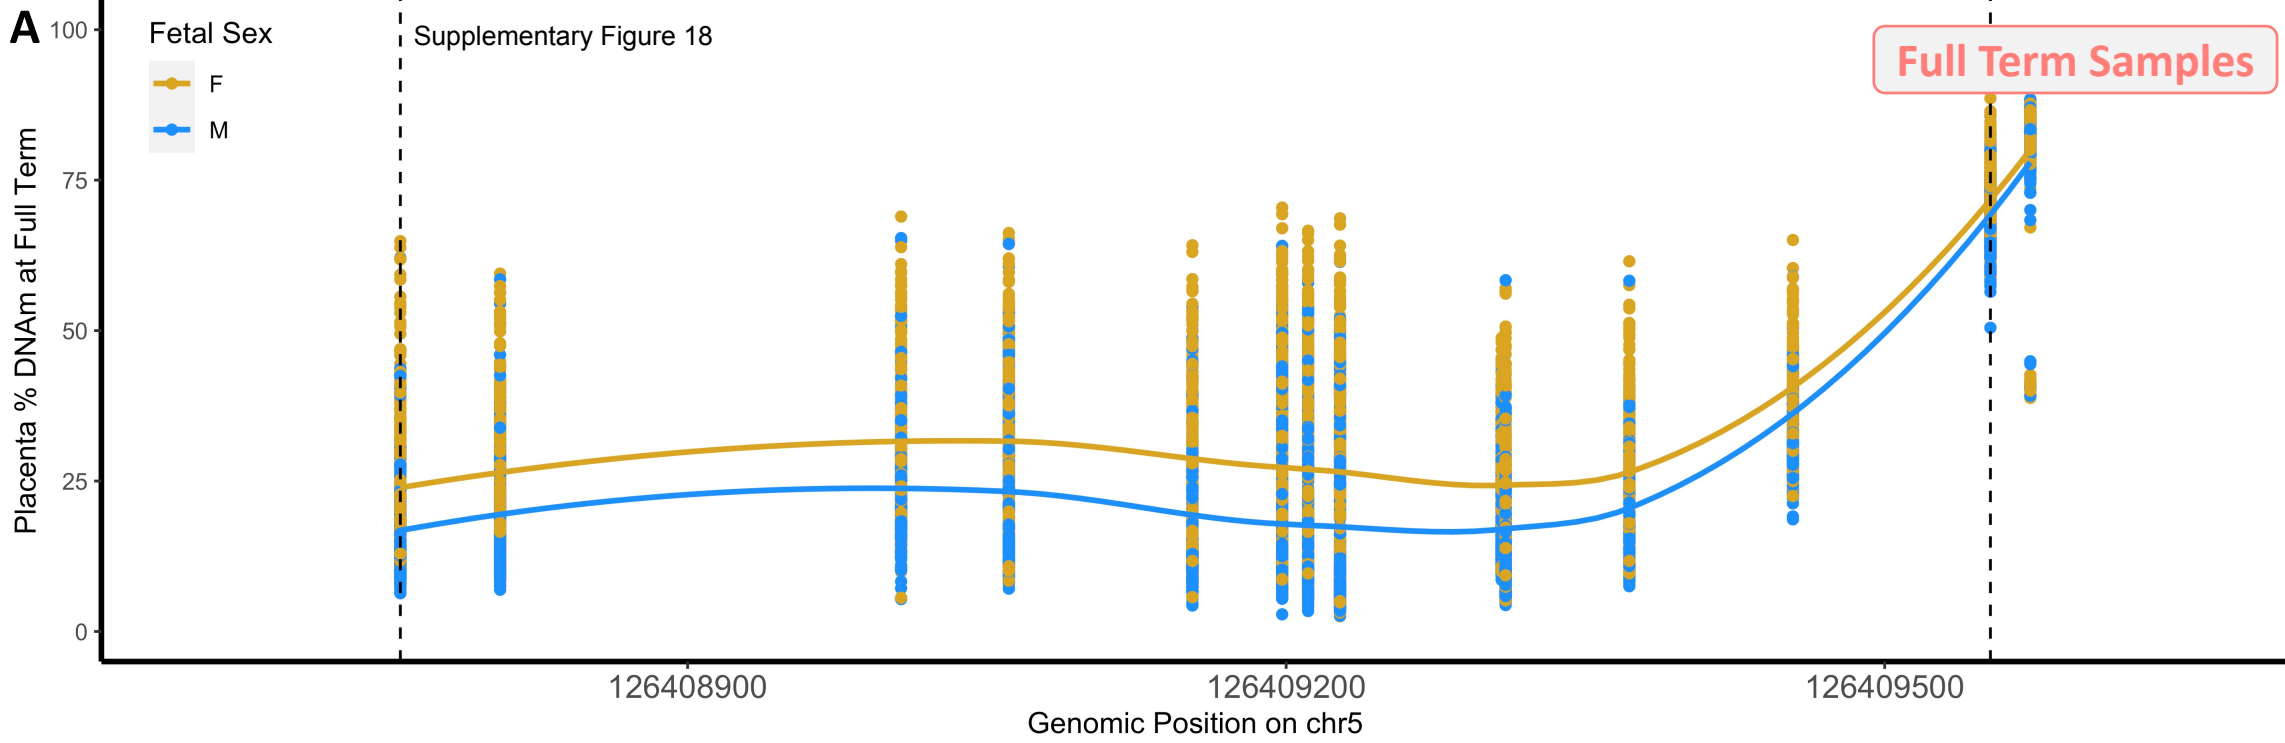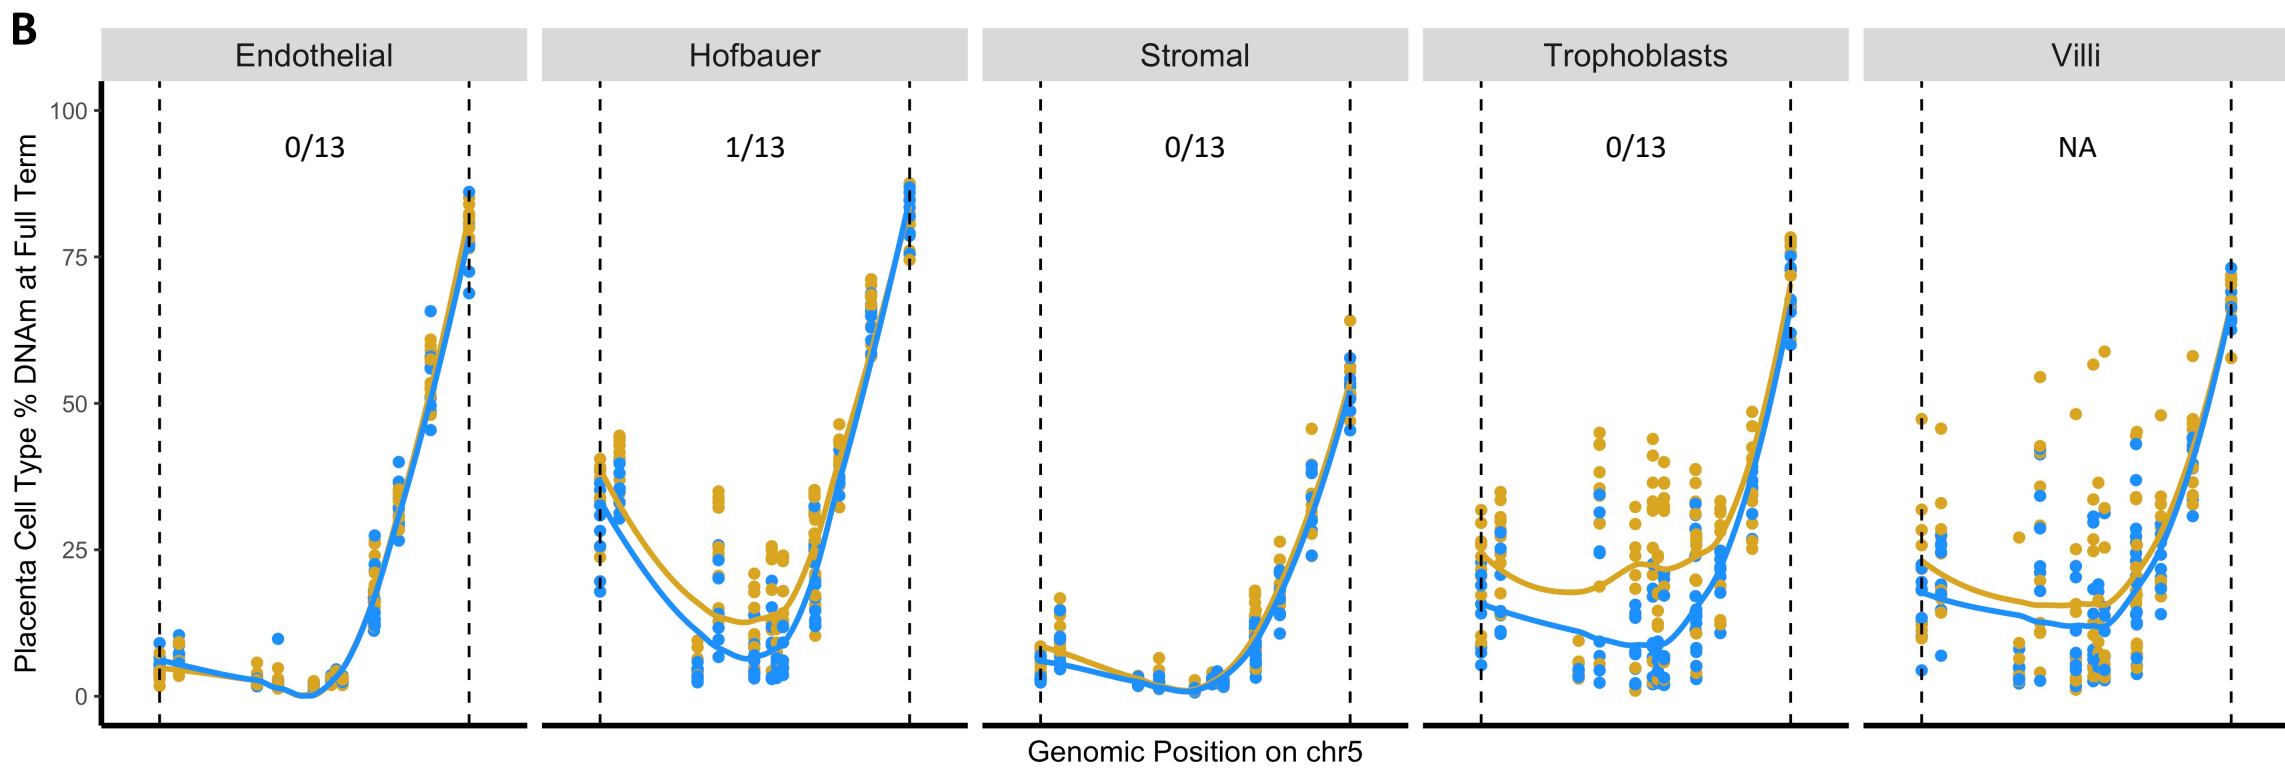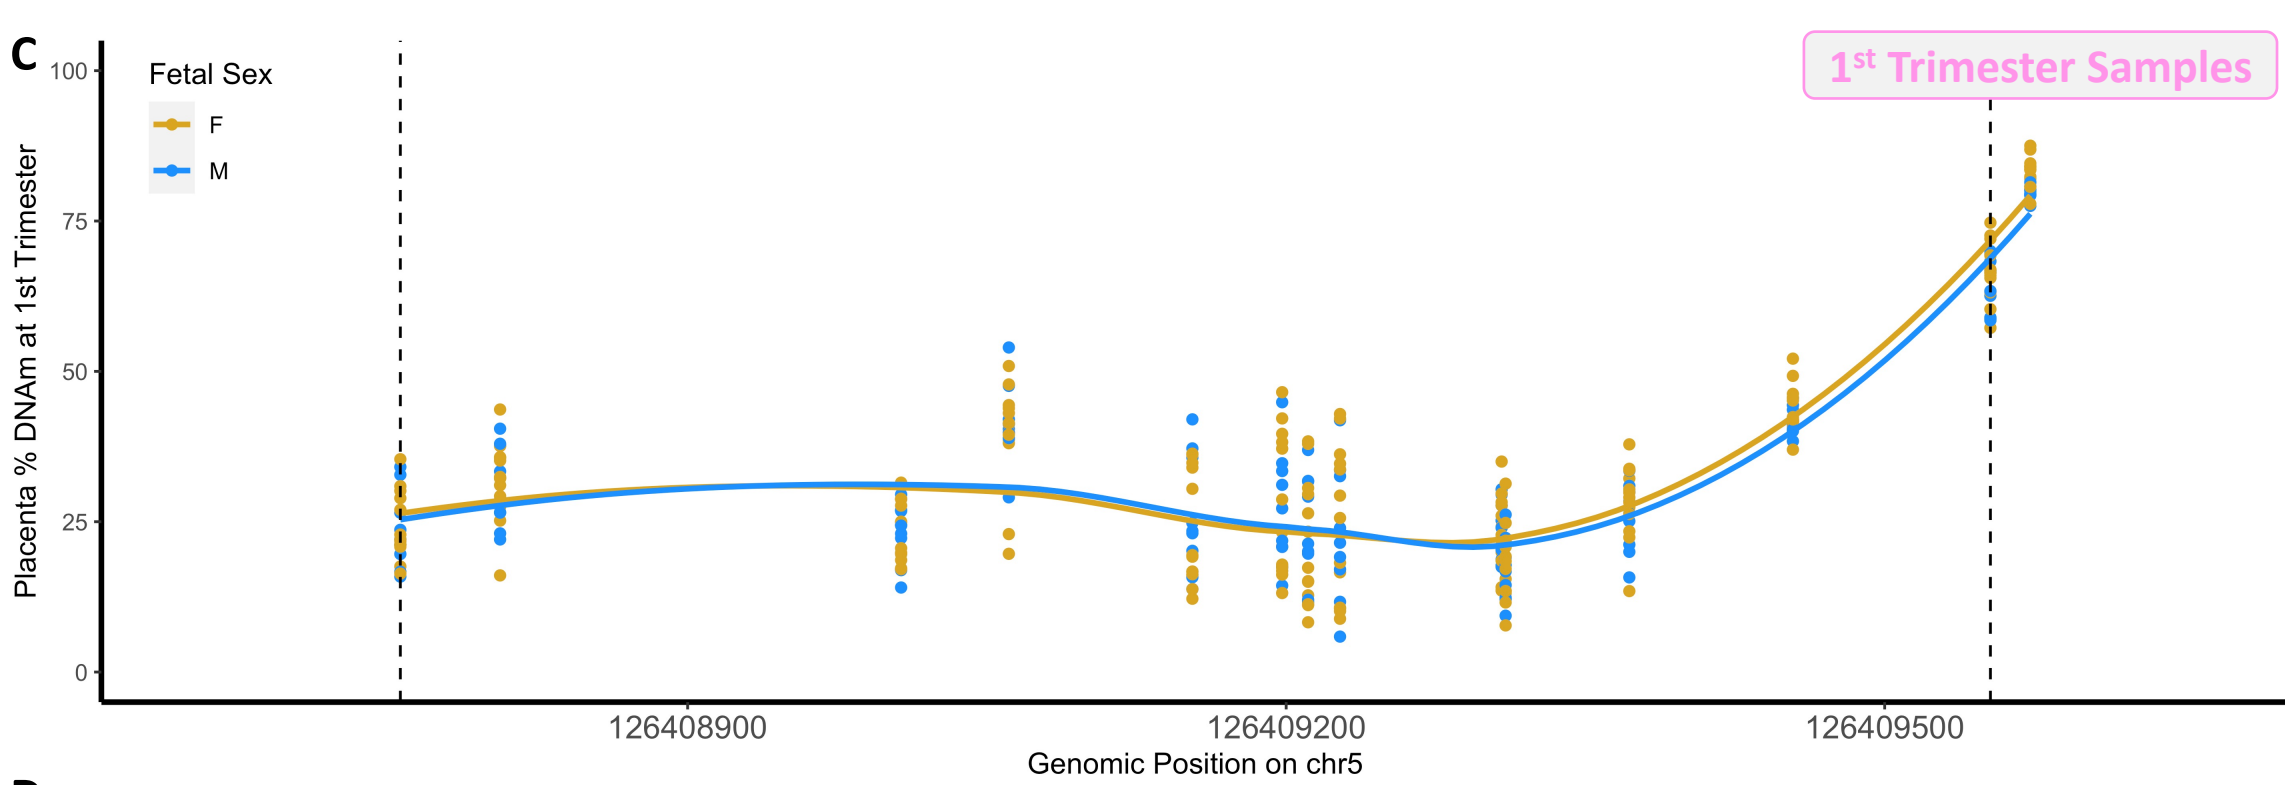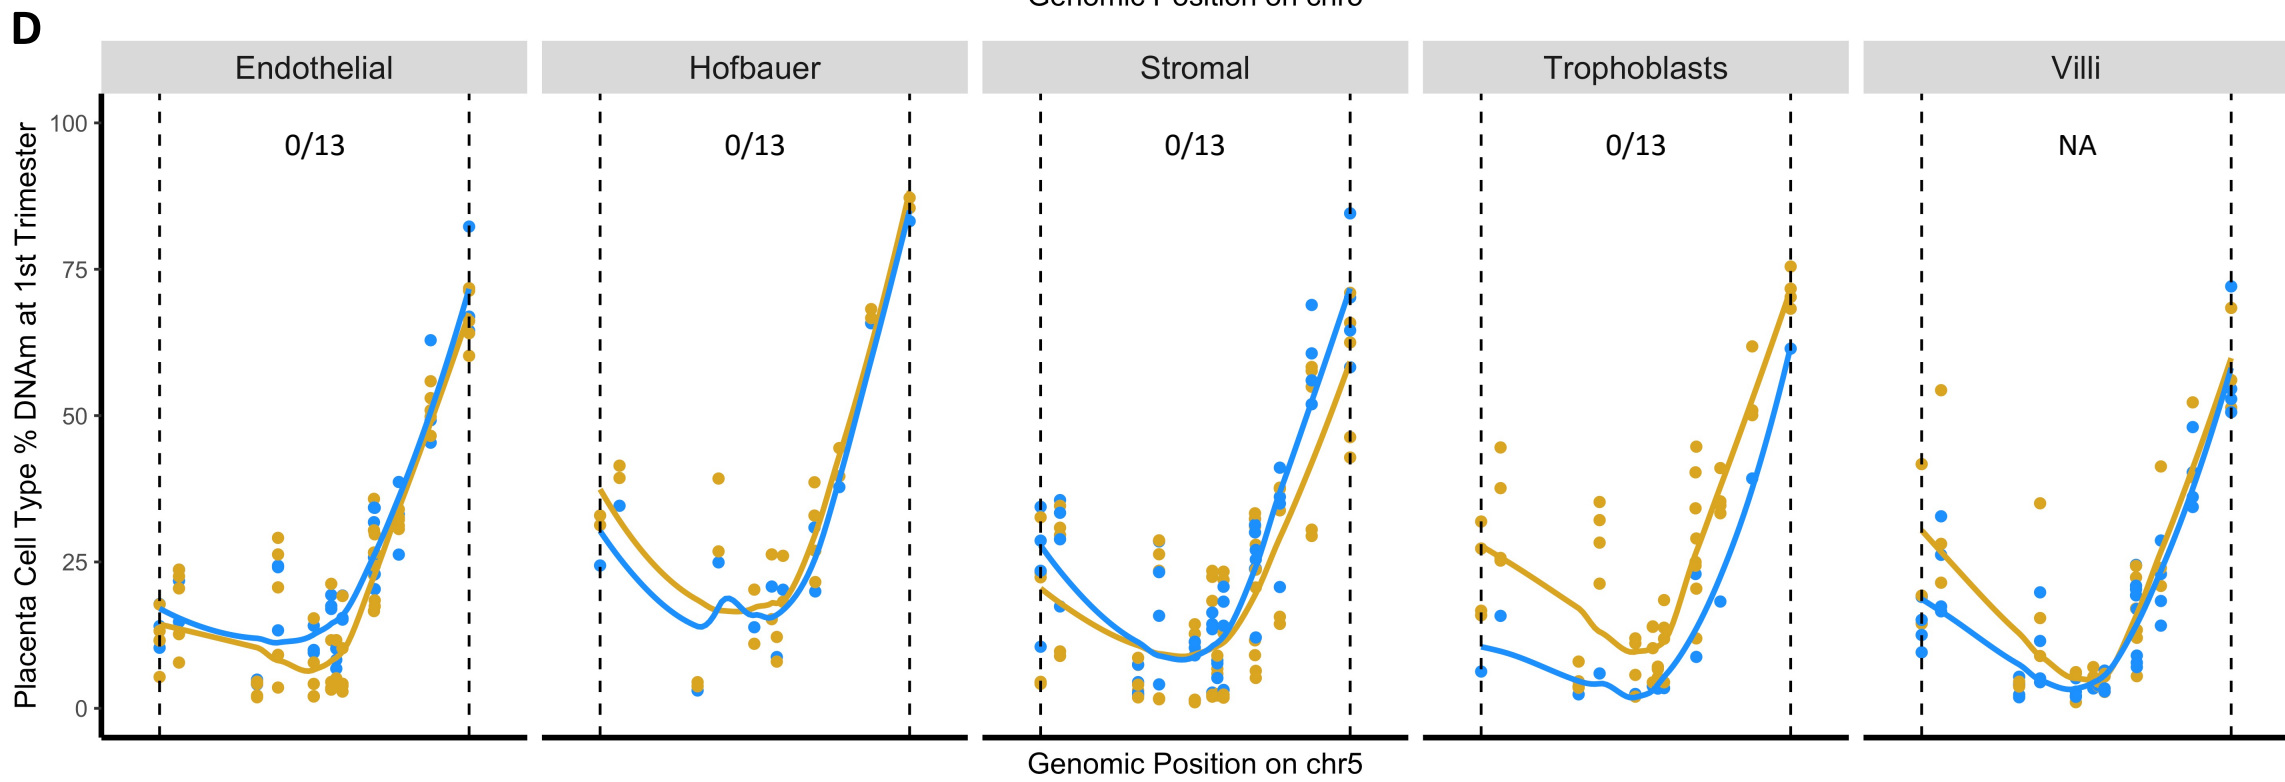

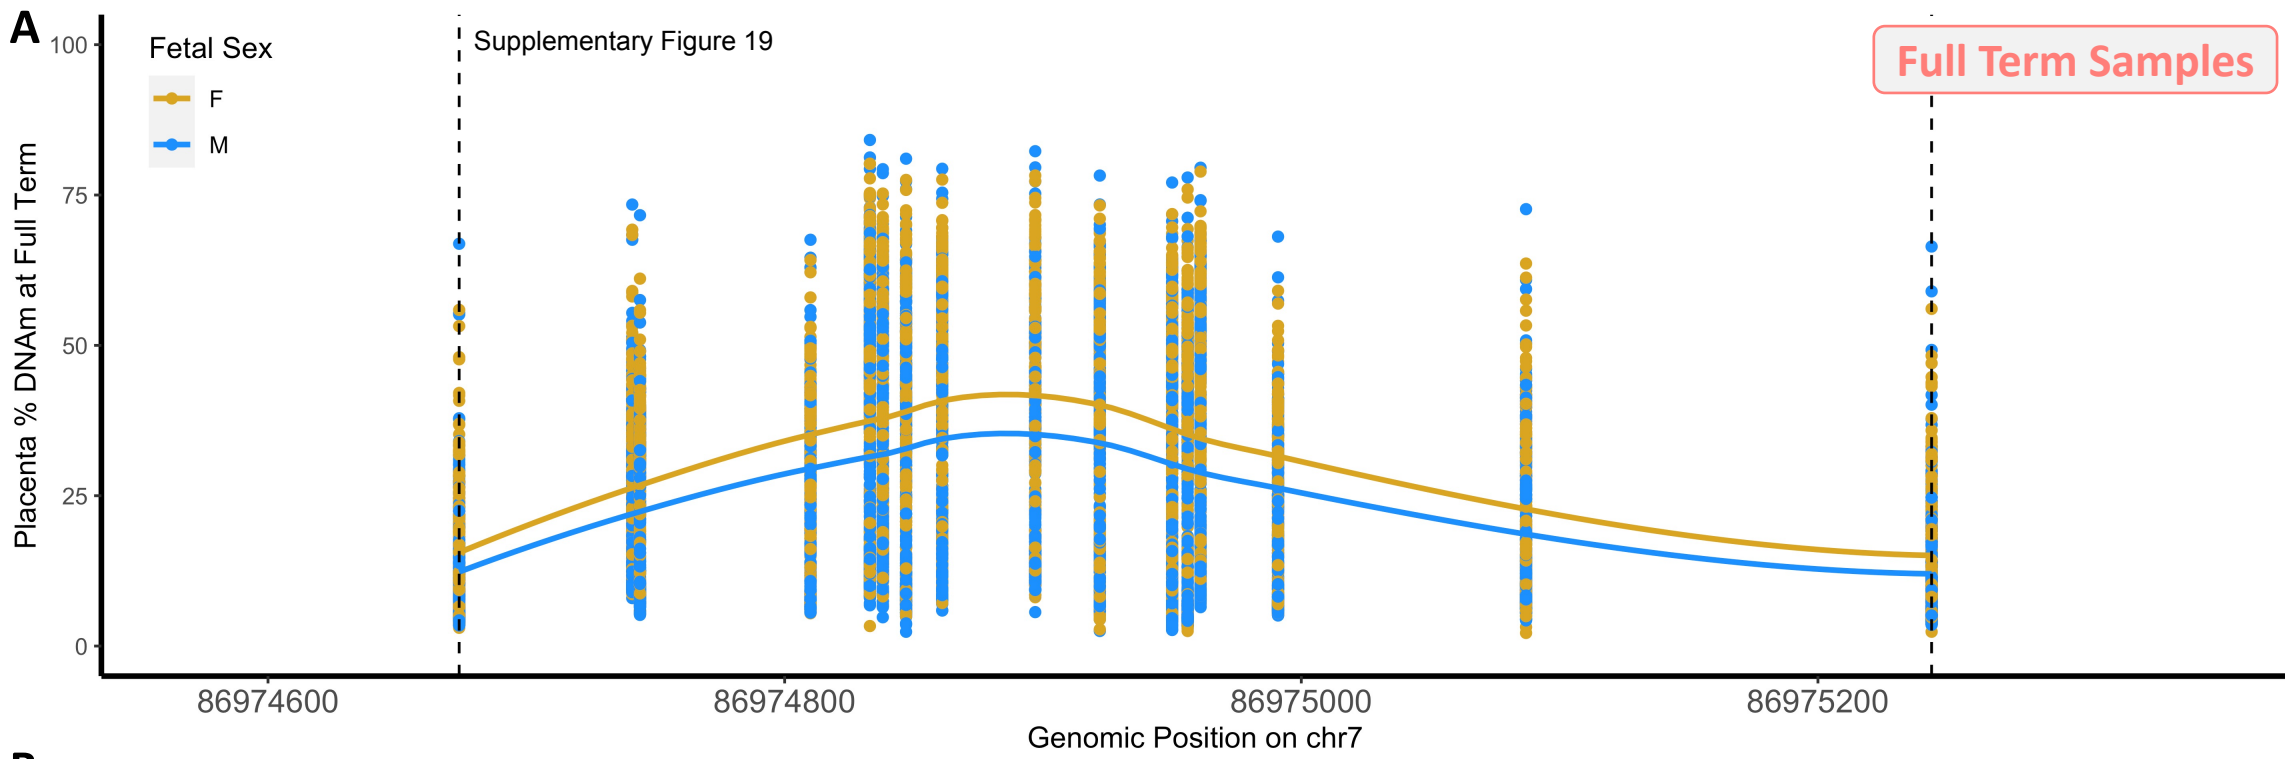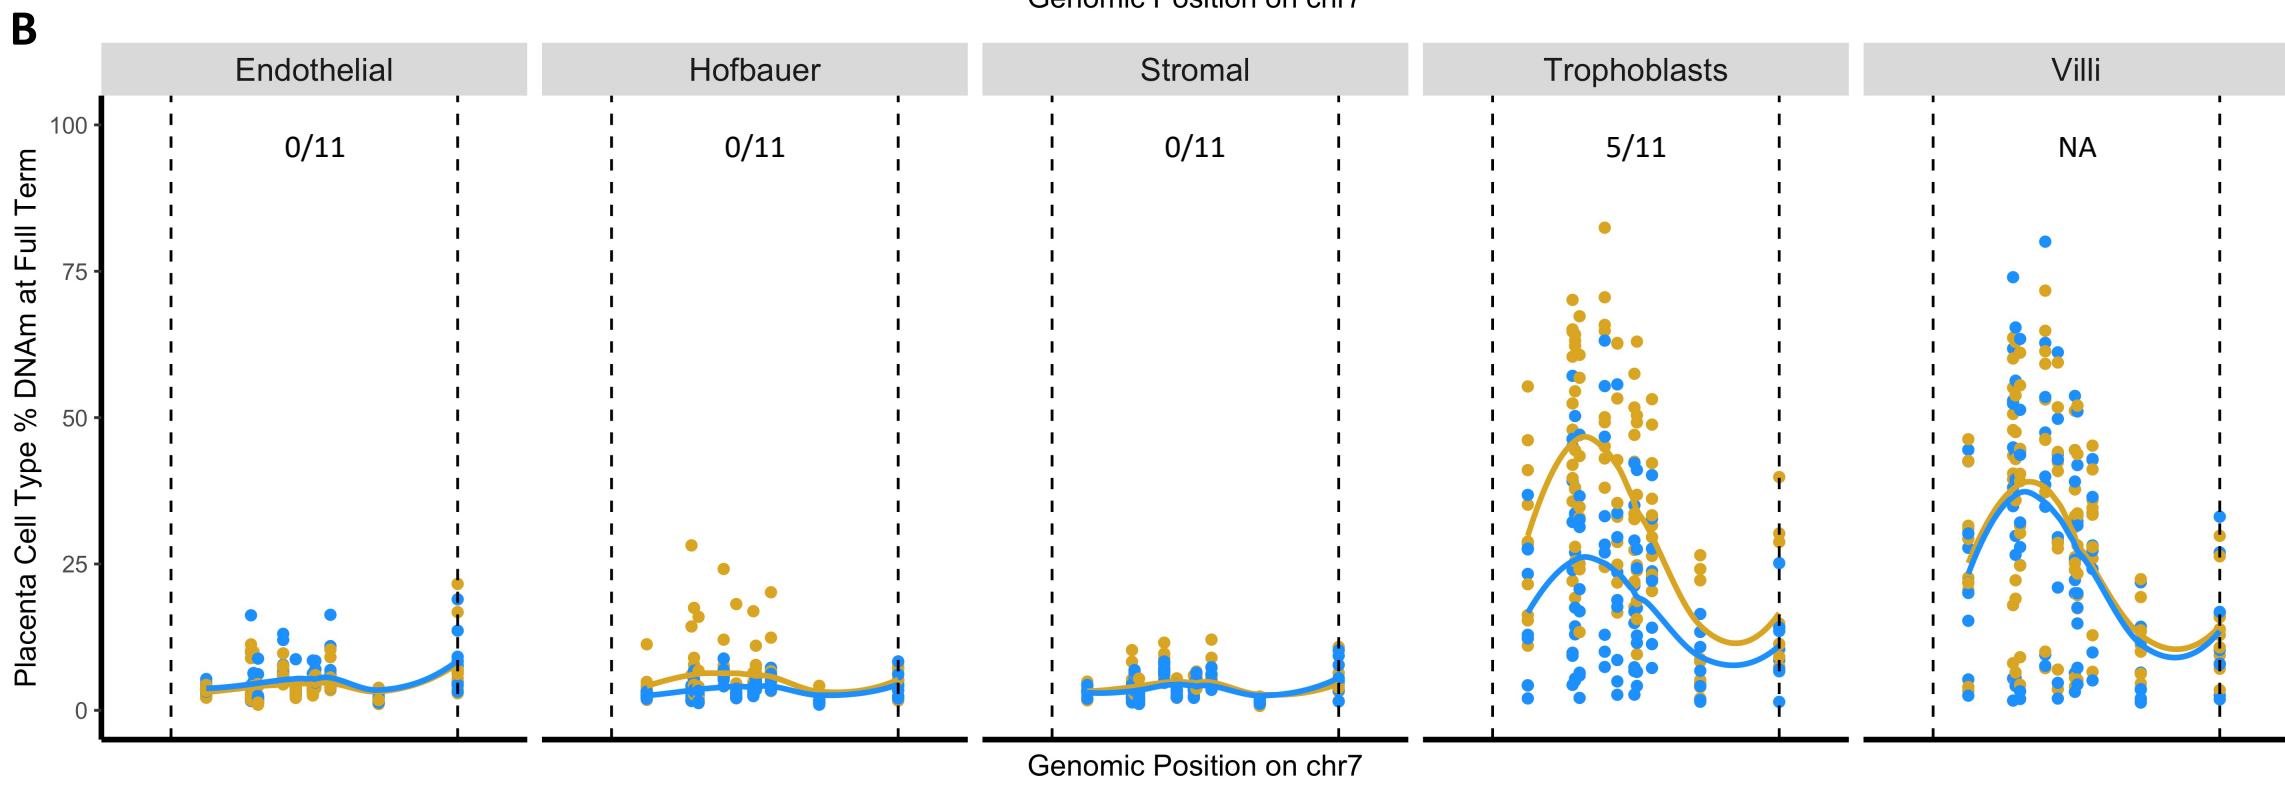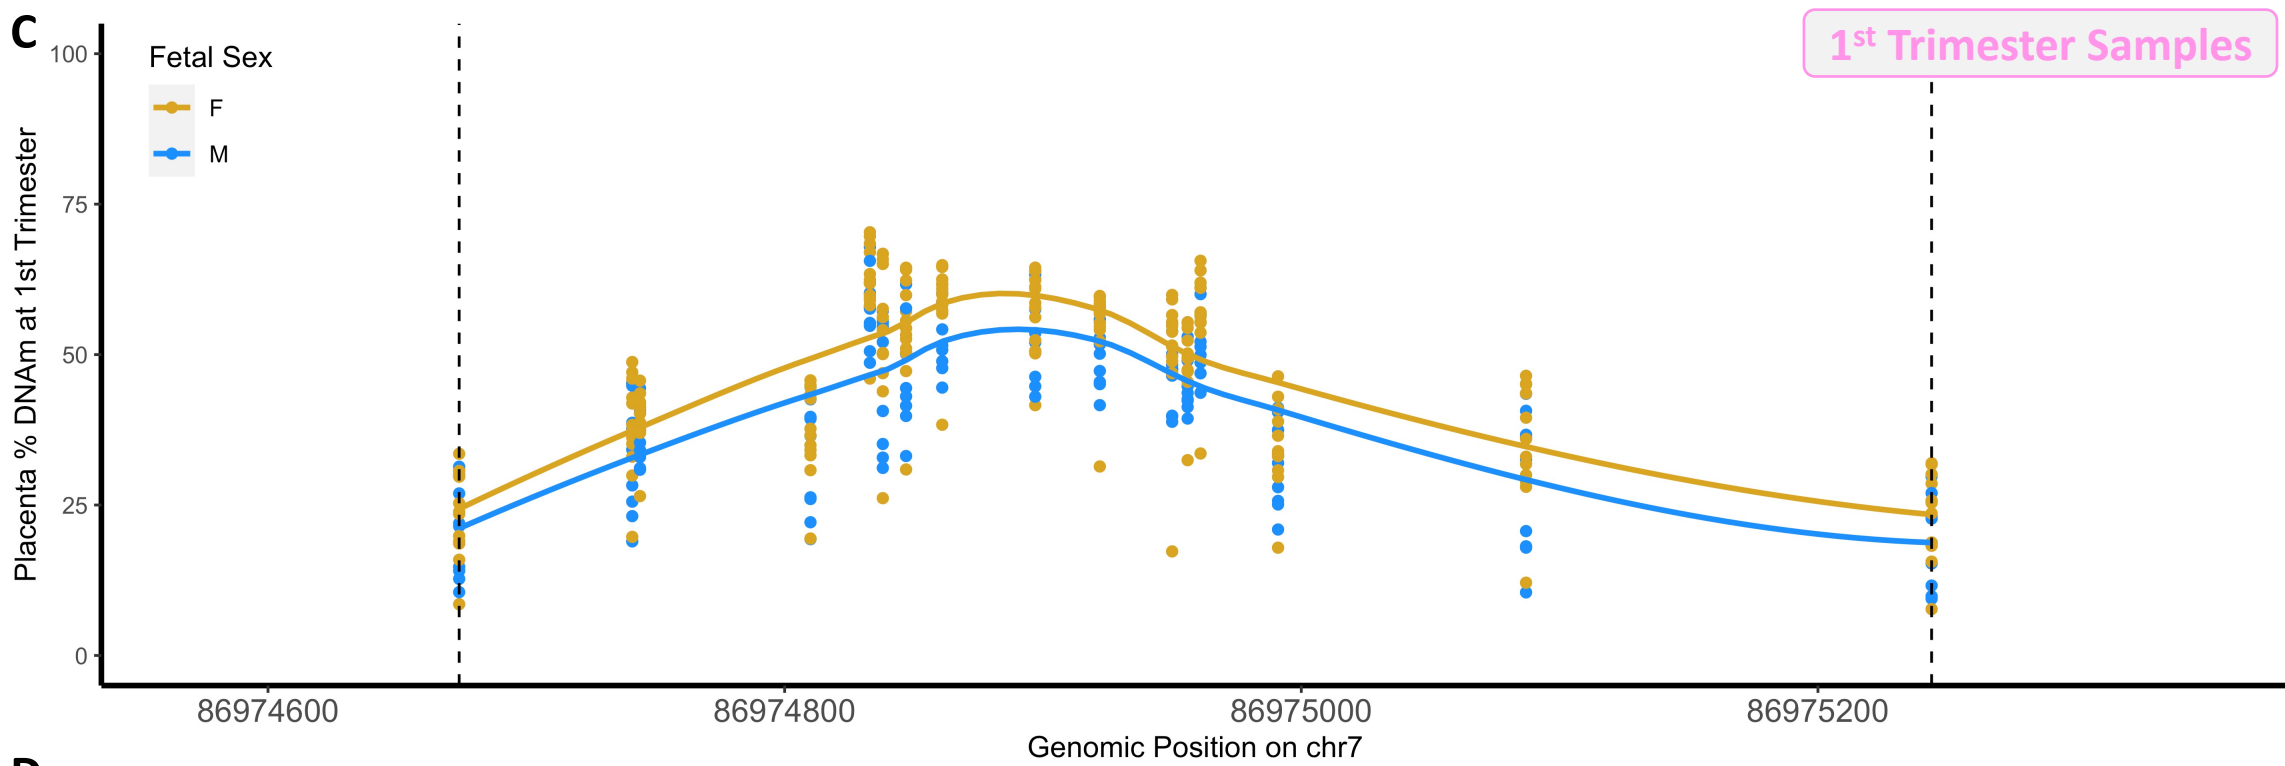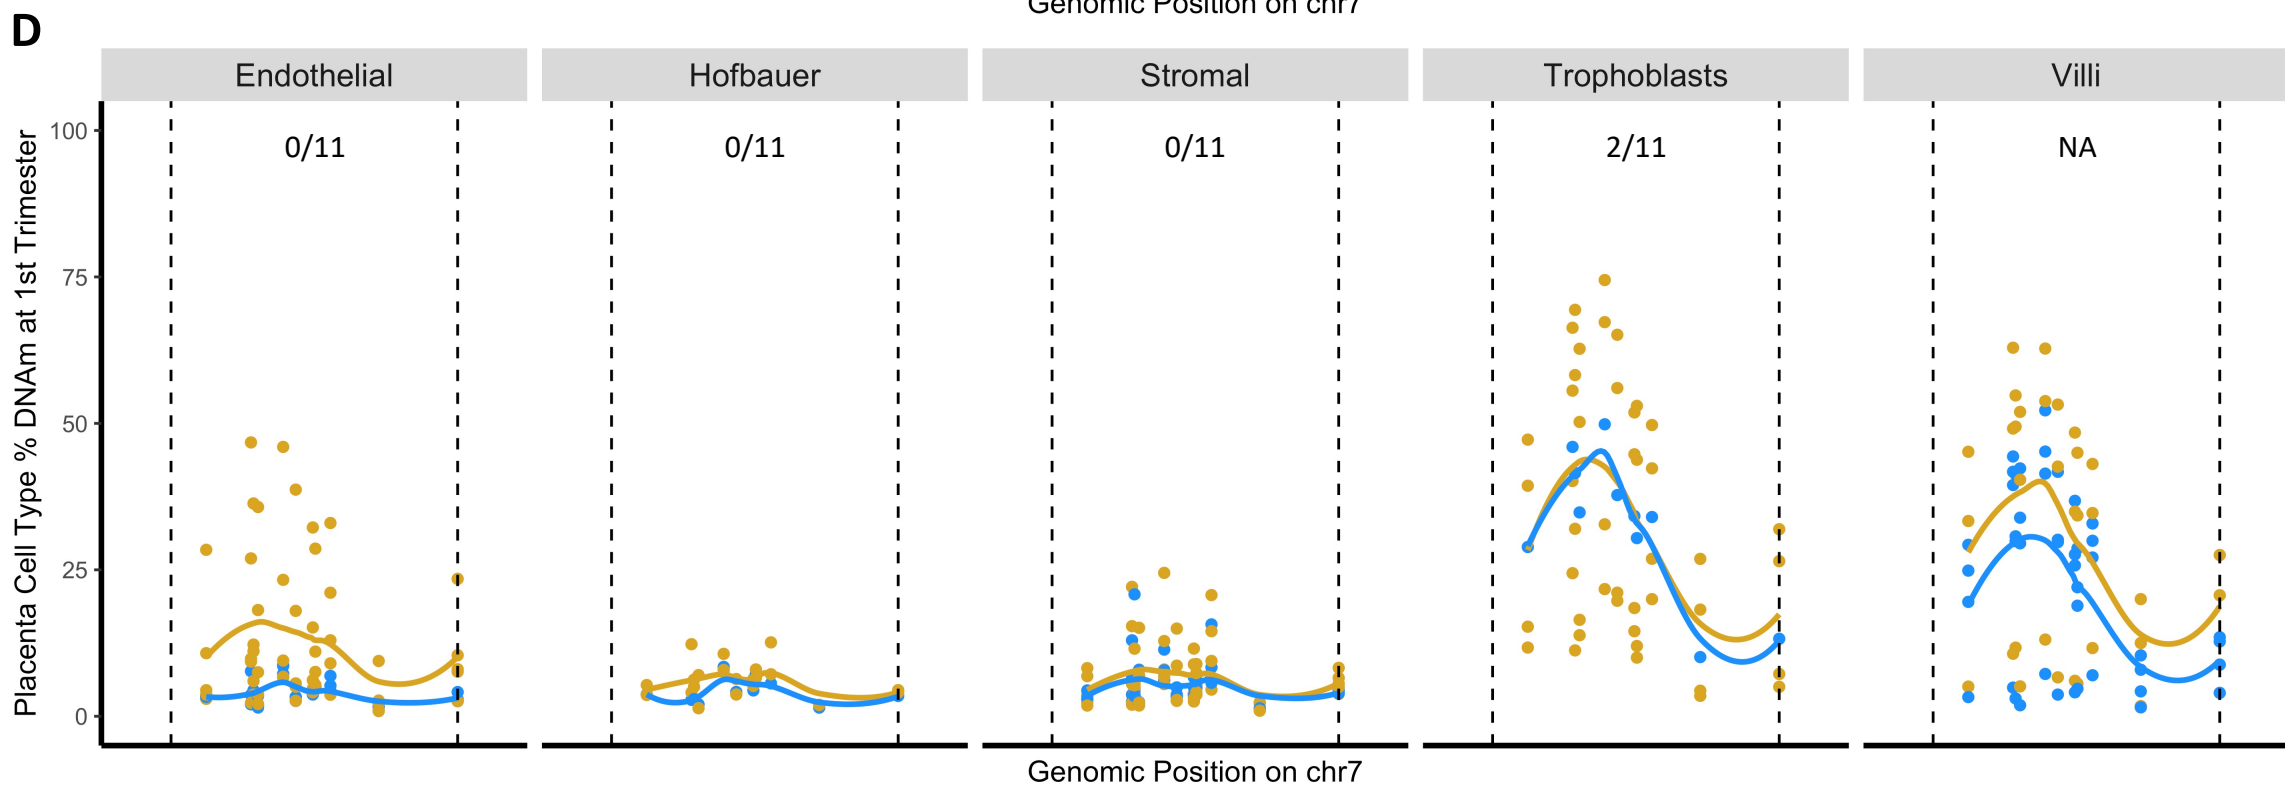

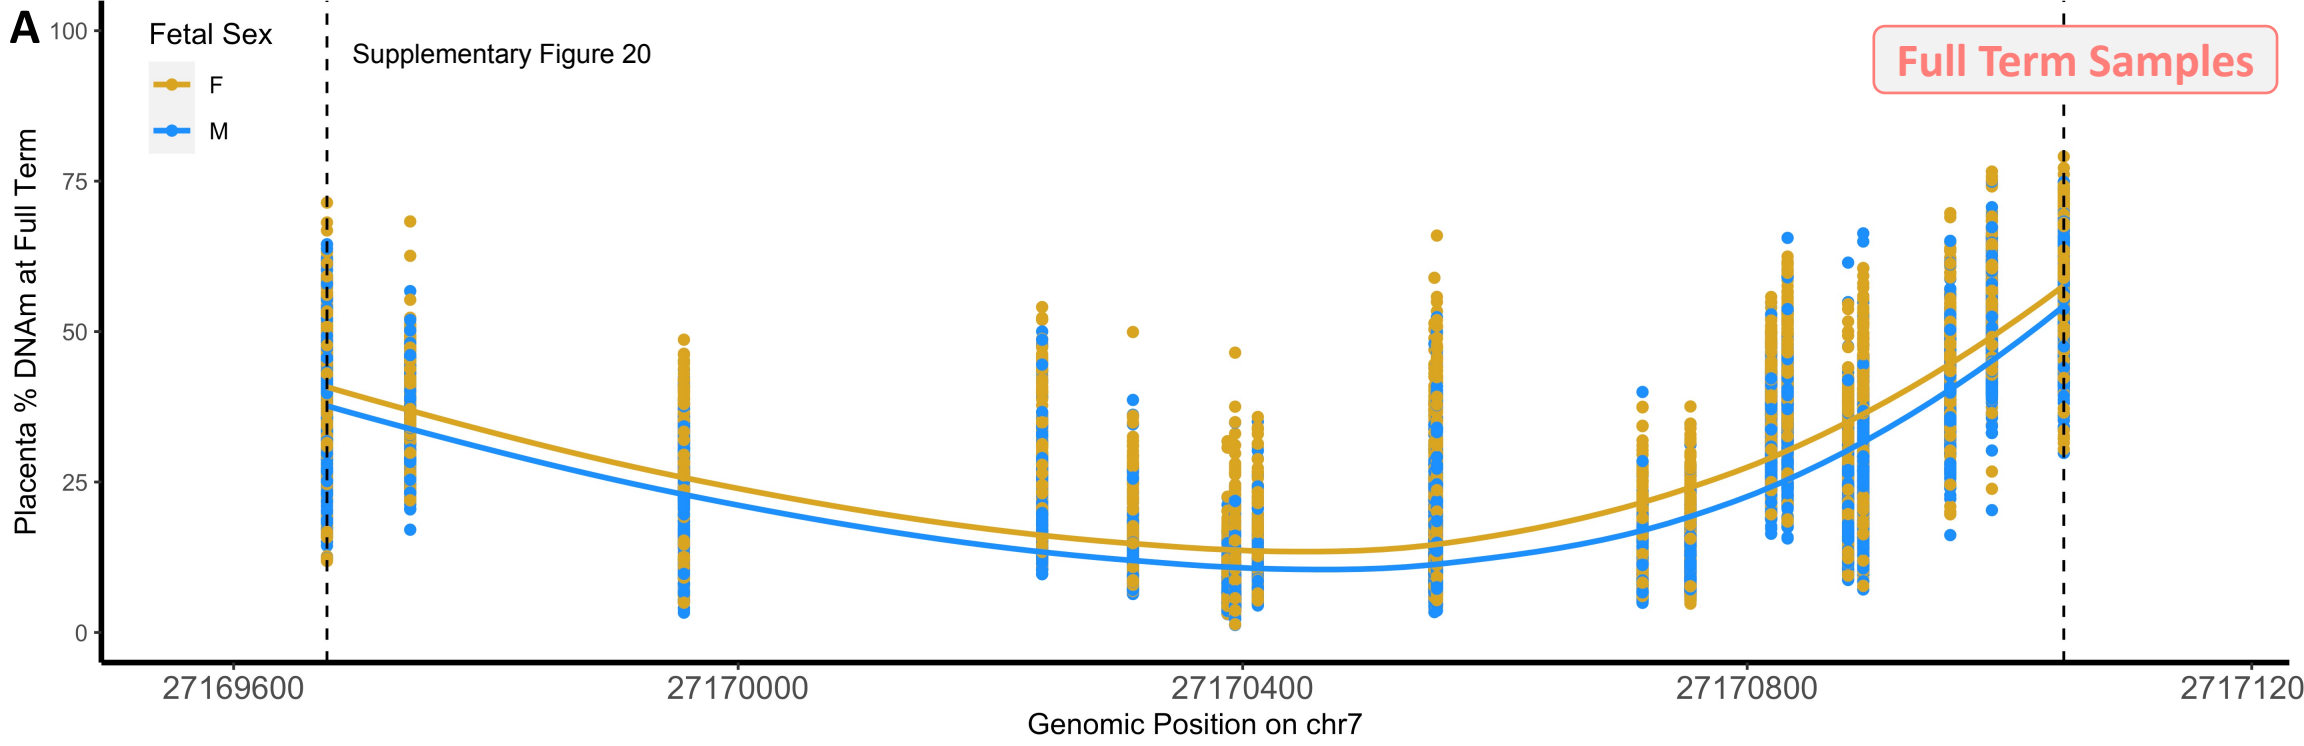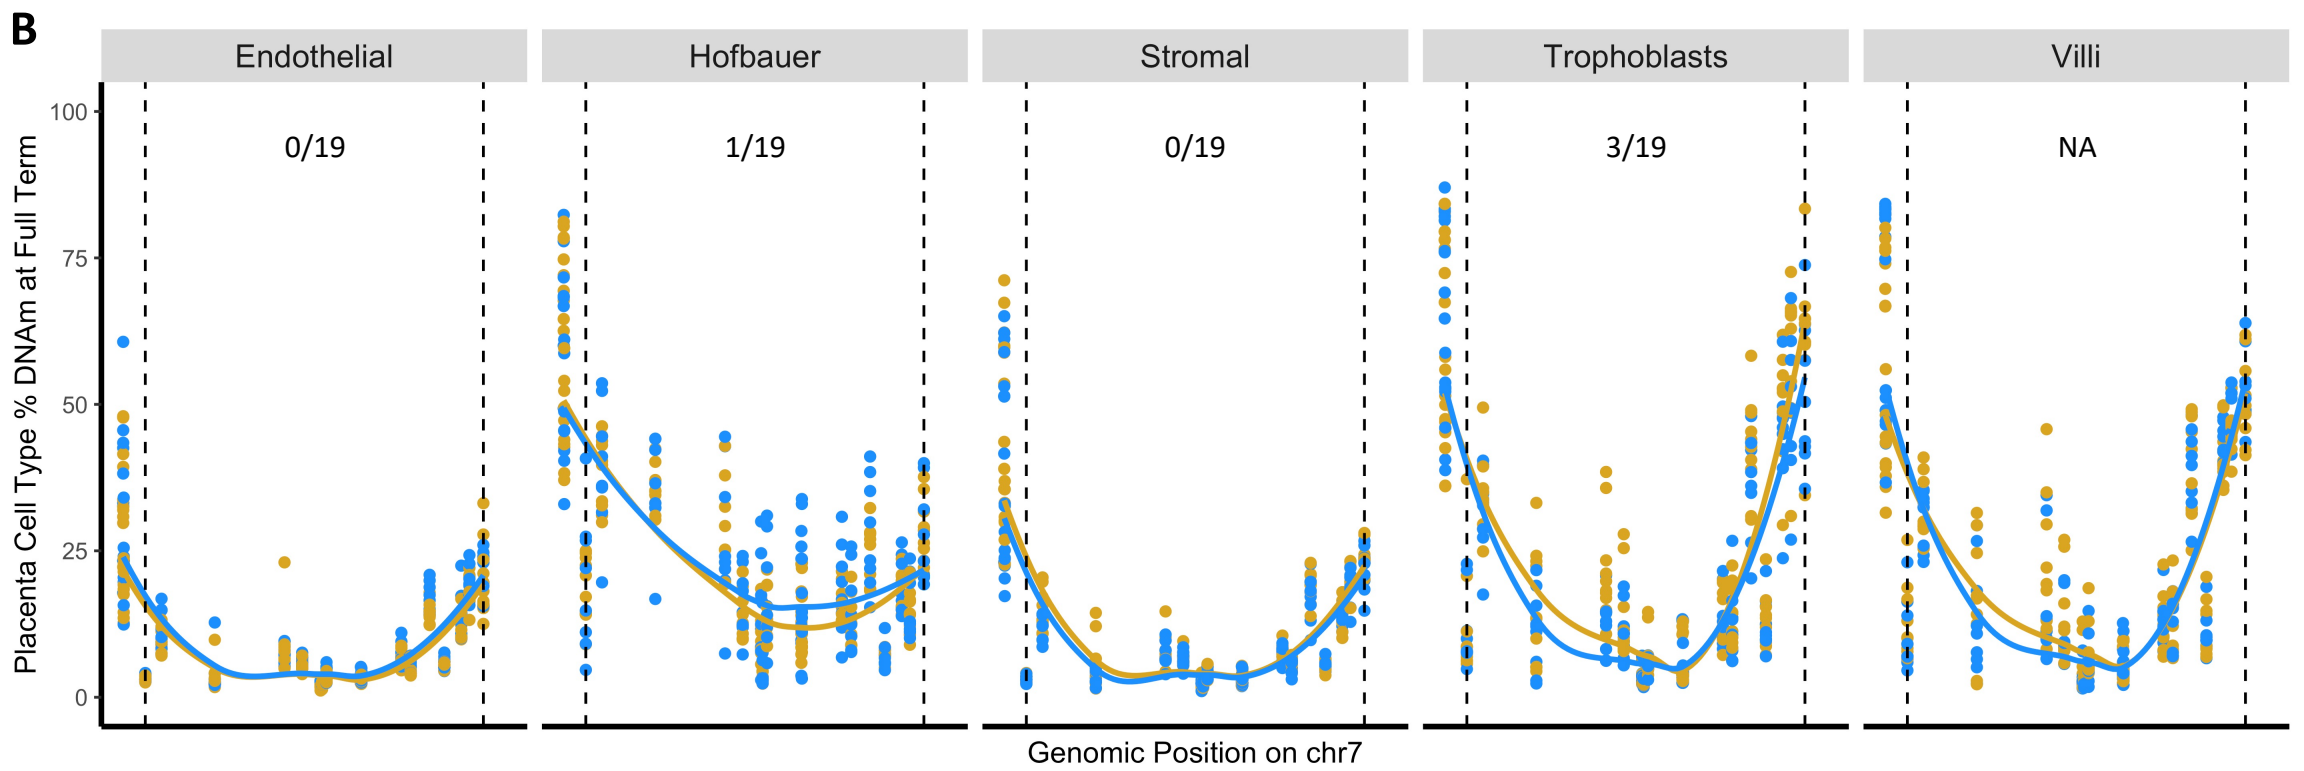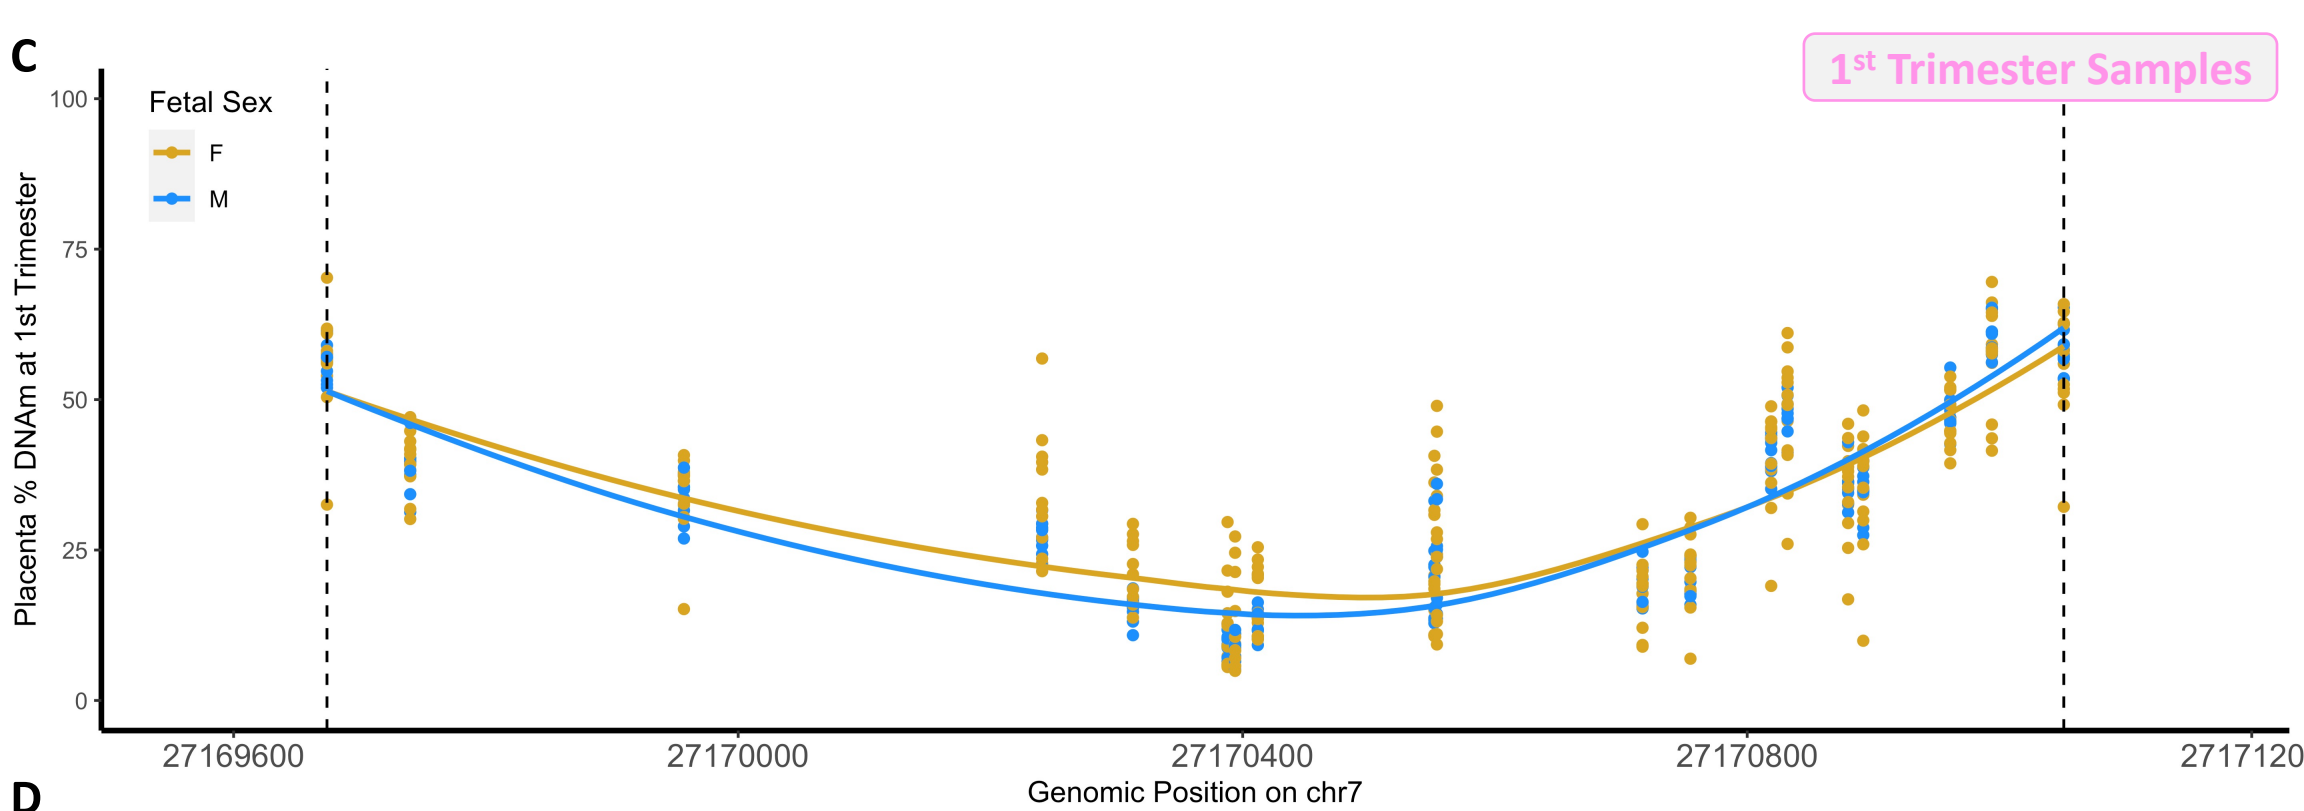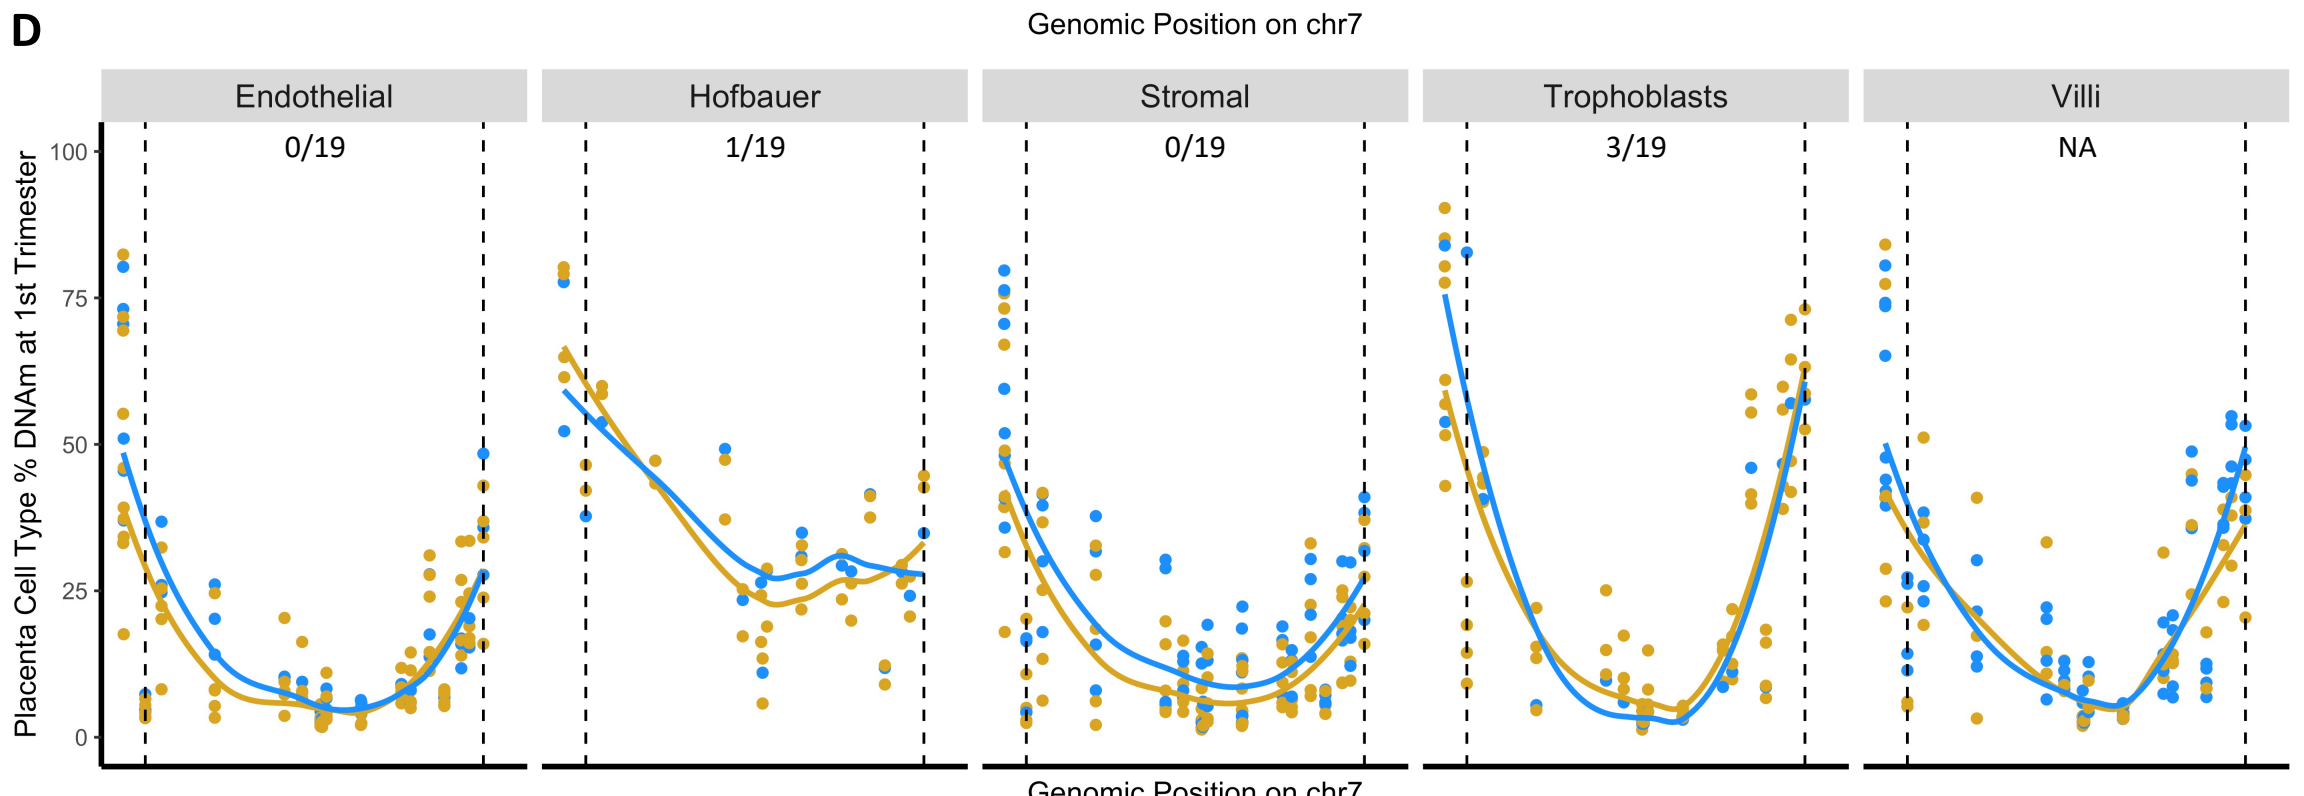



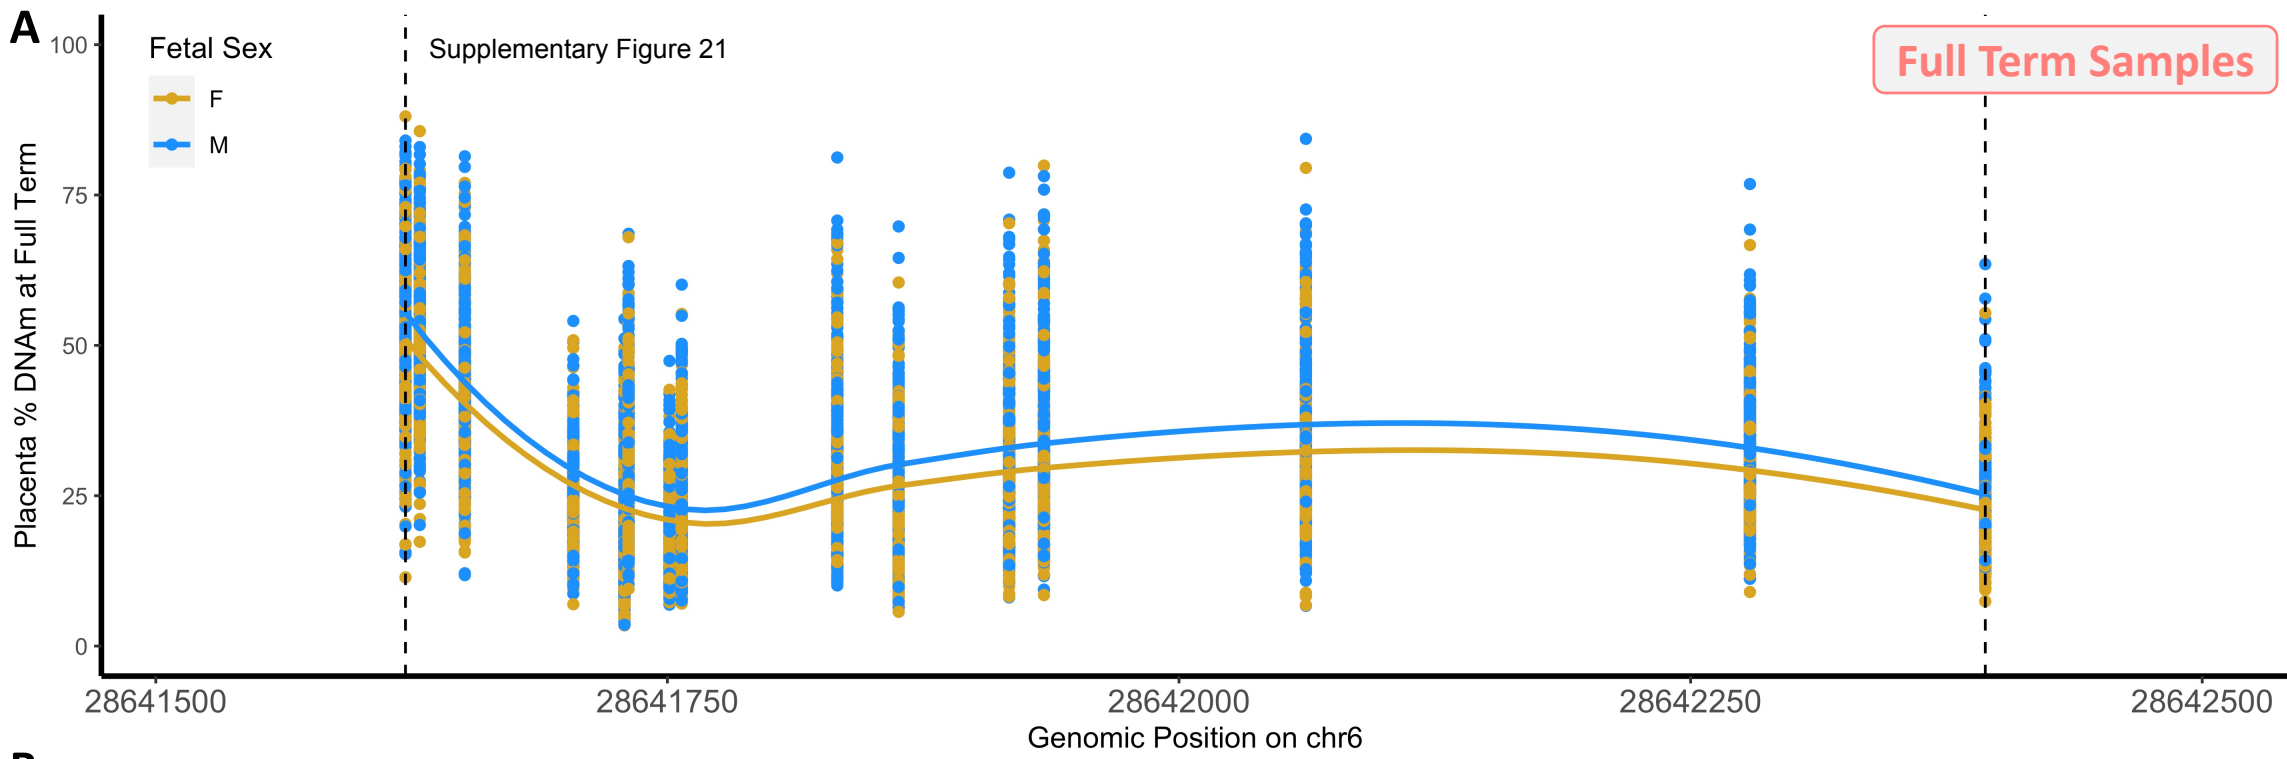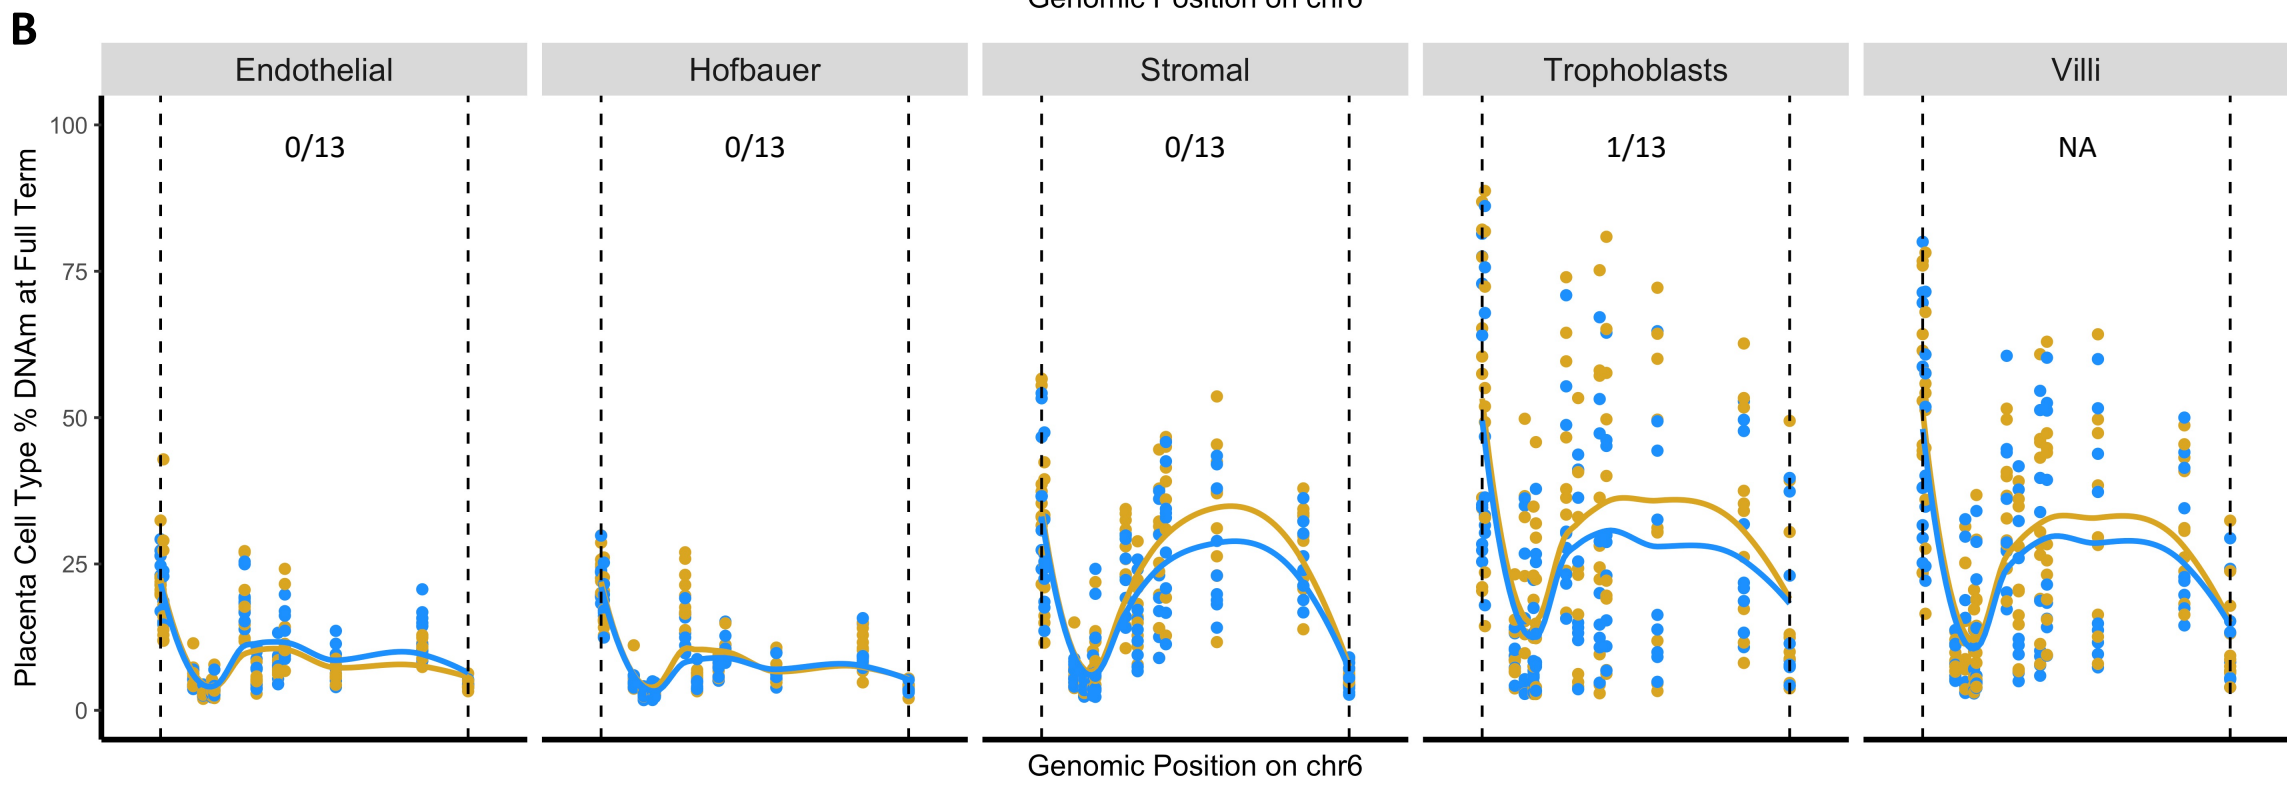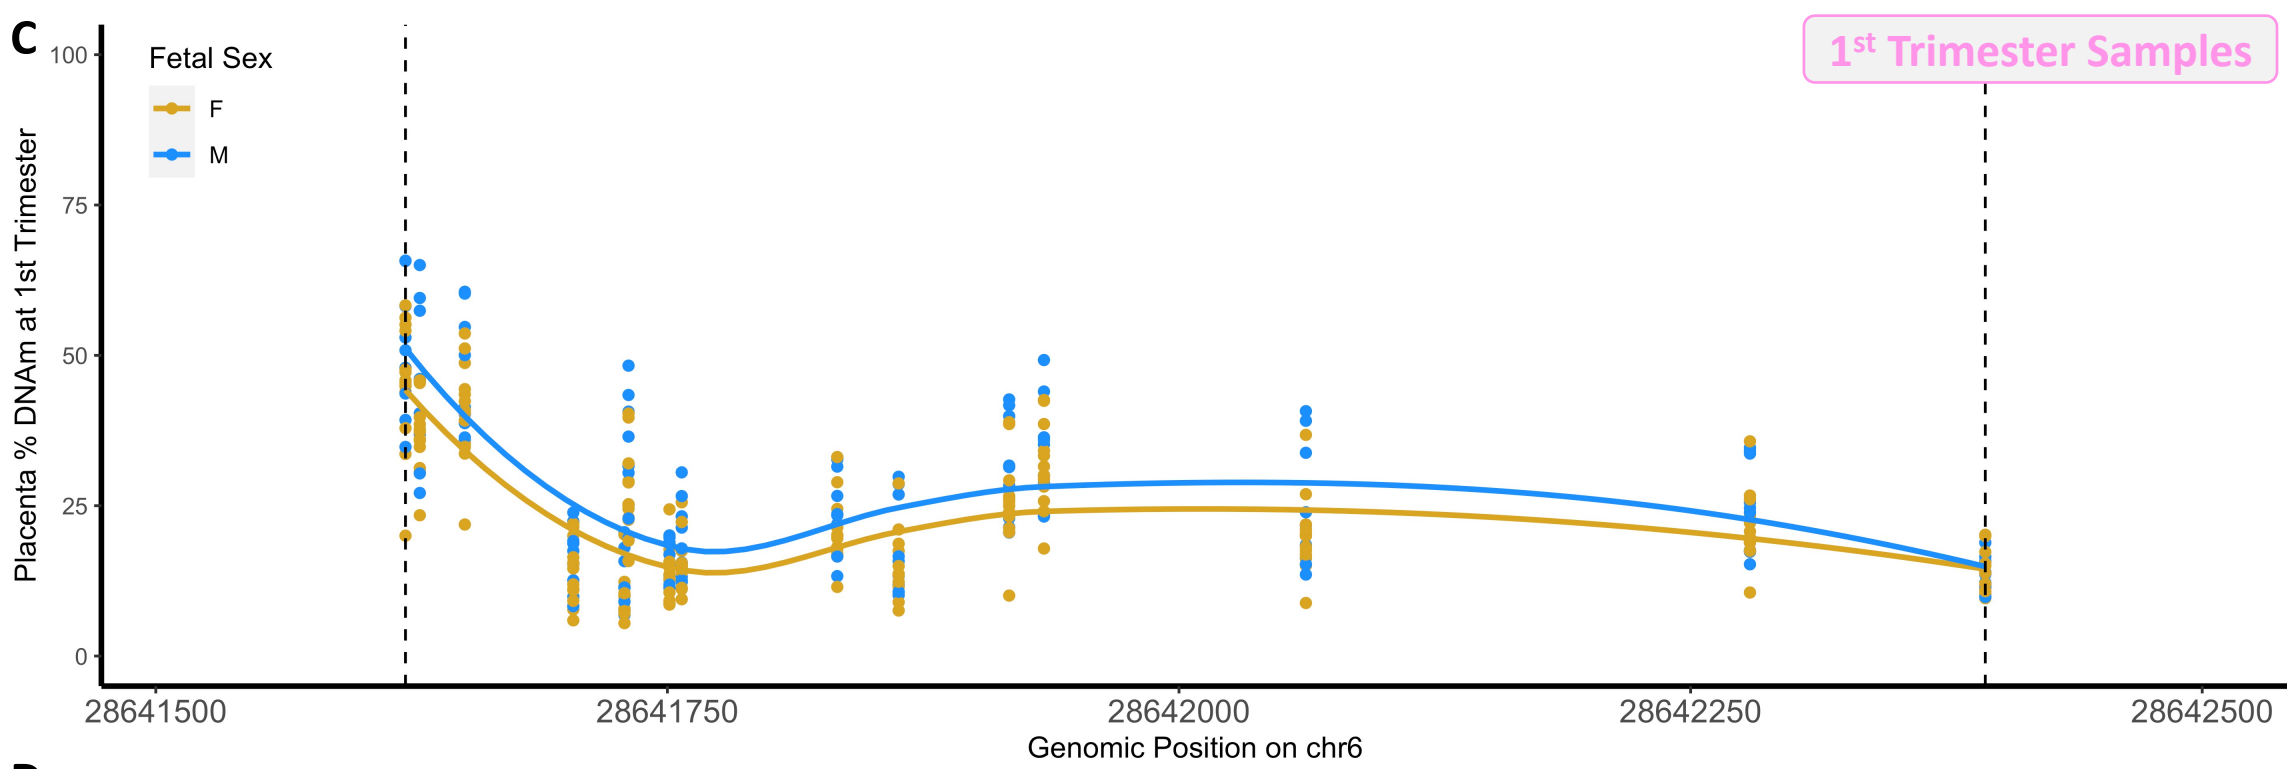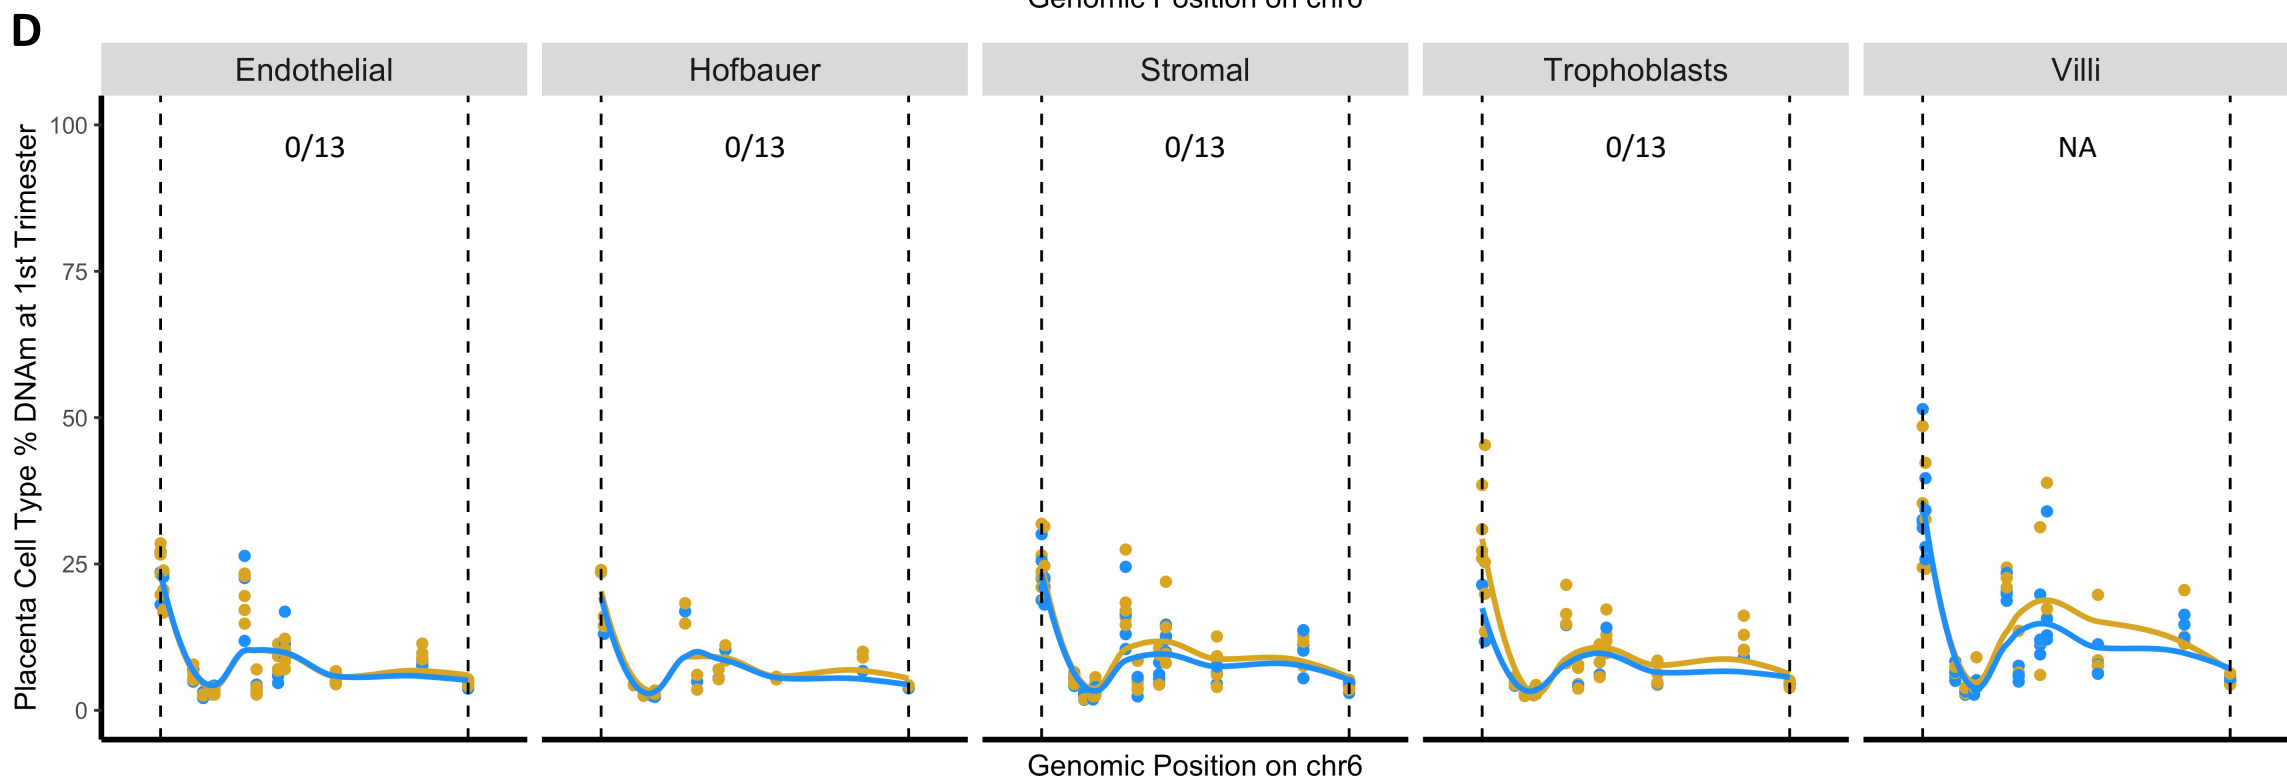

Supplement: 41598_2022_13544_MOESM13_ESM.pdf [file 41598_2022_13544_MOESM13_ESM.pdf]
