# Supplementary material for: Large-scale placenta DNA methylation integrated analysis reveals fetal sex-specific differentially methylated CpG sites and regions
Source: Sci Rep. 2022 Jun 7;12:9396. doi: 10.1038/s41598-022-13544-z (PMC9174475; doi:10.1038/s41598-022-13544-z)
Supplement: Supplementary file 6 — Supplementary Information 6. [file 41598_2022_13544_MOESM6_ESM.csv]

GO_ID	ONTOLOGY	TERM	N	DE	P.DE	FDR
GO:0031424	BP	keratinization	210	50	1.24035068112586e-18	2.80455692509368e-14
GO:0070268	BP	cornification	112	36	3.62855656524289e-16	4.10226462483535e-12
GO:0030216	BP	keratinocyte differentiation	290	60	9.55937795431334e-16	7.20490316416597e-12
GO:0009913	BP	epidermal cell differentiation	347	67	4.01205494474799e-14	2.26791435889242e-10
GO:0043588	BP	skin development	406	71	3.73766514377489e-11	1.69024693131788e-07
GO:0008544	BP	epidermis development	453	76	6.13586871247316e-11	2.31230212429551e-07
GO:0045095	CC	keratin filament	83	22	4.70161813556317e-10	1.51868982376027e-06
GO:0001533	CC	cornified envelope	44	13	2.67349598982479e-06	0.00755630222824104
GO:0099512	CC	supramolecular fiber	929	123	3.73990915017708e-06	0.00887404281550939
GO:0030280	MF	structural constituent of skin epidermis	14	7	3.92465738601096e-06	0.00887404281550939
GO:0099081	CC	supramolecular polymer	935	123	5.18777410521256e-06	0.0106637054811783
GO:0030855	BP	epithelial cell differentiation	758	100	7.75874209905454e-06	0.0146194098001435
GO:0005882	CC	intermediate filament	193	30	8.64453464031454e-06	0.0150355055963194
GO:0022843	MF	voltage-gated cation channel activity	134	32	1.28160612037399e-05	0.0206988542769831
GO:0099080	CC	supramolecular complex	1232	151	1.66293946945488e-05	0.0250671495625628
GO:0005786	CC	signal recognition particle	endoplasmic reticulum targeting	6	5	1.94329425673092e-05	0.0274623915243393
GO:0099513	CC	polymeric cytoskeletal fiber	704	93	3.31096199912065e-05	0.04403774221301
GO:0008312	MF	7S RNA binding	7	5	5.69543866531931e-05	0.071544202034186
GO:0034703	CC	cation channel complex	211	41	8.92462111738672e-05	0.106207688465911
GO:0045111	CC	intermediate filament cytoskeleton	228	32	0.000107636071332425	0.121687960444873
GO:1905538	MF	polysome binding	7	5	0.000143046403216626	0.154020105863387
GO:0005244	MF	voltage-gated ion channel activity	185	36	0.000180611103284977	0.177556419842461
GO:0022832	MF	voltage-gated channel activity	185	36	0.000180611103284977	0.177556419842461
GO:0008009	MF	chemokine activity	49	10	0.000253539781295972	0.238866166453467
GO:0048500	CC	signal recognition particle	9	5	0.000296324070655792	0.258624239143199
GO:1902495	CC	transmembrane transporter complex	306	51	0.000297387564359081	0.258624239143199
GO:0060429	BP	epithelium development	1272	152	0.000347083628753628	0.276314325205954
GO:0034704	CC	calcium channel complex	65	17	0.000352065735583456	0.276314325205954
GO:0048020	MF	CCR chemokine receptor binding	41	9	0.000354390138913479	0.276314325205954
GO:0034702	CC	ion channel complex	284	48	0.0003977300349097	0.299769127311441
GO:0060997	BP	dendritic spine morphogenesis	55	16	0.000450235074715417	0.32839565401259
GO:0070412	MF	R-SMAD binding	23	9	0.00049226464135776	0.337674115970681
GO:1990351	CC	transporter complex	314	51	0.000492824104508092	0.337674115970681
GO:0018149	BP	peptide cross-linking	32	9	0.000561464091555125	0.373390134533909
GO:0072677	BP	eosinophil migration	23	7	0.000644631604952391	0.4164504348451
GO:0018685	MF	alkane 1-monooxygenase activity	5	3	0.000730275998803531	0.457979444094121
GO:0099604	MF	ligand-gated calcium channel activity	26	10	0.000766324638338706	0.457979444094121
GO:0048245	BP	eosinophil chemotaxis	19	6	0.000769679309874689	0.457979444094121
GO:0044839	BP	cell cycle G2/M phase transition	262	39	0.000951817101087211	0.551834268530331
GO:0043558	BP	regulation of translational initiation in response to stress	14	6	0.00102064997941986	0.576947917116559
GO:0017146	CC	NMDA selective glutamate receptor complex	11	6	0.00137067372720328	0.755909845019352
GO:0106027	BP	neuron projection organization	84	19	0.00164916532676754	0.840343840518969
GO:0005047	MF	signal recognition particle binding	4	3	0.00168317776989994	0.840343840518969
GO:0035371	CC	microtubule plus-end	23	8	0.00169626433593176	0.840343840518969
GO:0070193	BP	synaptonemal complex organization	23	7	0.00169751665239061	0.840343840518969
GO:0035092	BP	sperm chromatin condensation	12	5	0.00170960225836419	0.840343840518969
GO:0022849	MF	glutamate-gated calcium ion channel activity	5	4	0.00181113145766368	0.869712701872701
GO:1990752	CC	microtubule end	34	10	0.00185396621217469	0.869712701872701
GO:0061001	BP	regulation of dendritic spine morphogenesis	42	12	0.00191595277181844	0.869712701872701
GO:0097061	BP	dendritic spine organization	77	18	0.00195962243057518	0.869712701872701
GO:0007019	BP	microtubule depolymerization	41	11	0.00196167121292768	0.869712701872701
GO:0005891	CC	voltage-gated calcium channel complex	42	12	0.00209447037946215	0.910732110577281
GO:0005245	MF	voltage-gated calcium channel activity	43	12	0.00232606999507387	0.99235412563425
GO:0032058	BP	positive regulation of translational initiation in response to stress	4	3	0.0026492280549194	1
GO:0005874	CC	microtubule	409	56	0.00276754537398526	1
GO:0000086	BP	G2/M transition of mitotic cell cycle	244	35	0.00296013687432317	1
GO:0042379	MF	chemokine receptor binding	64	10	0.00333314316679272	1
GO:0051010	MF	microtubule plus-end binding	20	7	0.00369029431831708	1
GO:0003774	MF	motor activity	129	23	0.0037667600606392	1
GO:0003334	BP	keratinocyte development	12	5	0.00384556983268634	1
GO:0034765	BP	regulation of ion transmembrane transport	460	63	0.00448569399150314	1
GO:0005876	CC	spindle microtubule	61	12	0.00480576093629731	1
GO:0070098	BP	chemokine-mediated signaling pathway	85	13	0.00502796537671529	1
GO:0003095	BP	pressure natriuresis	3	2	0.00509934911857844	1
GO:0005583	CC	fibrillar collagen trimer	12	5	0.00524646439845896	1
GO:0098643	CC	banded collagen fibril	12	5	0.00524646439845896	1
GO:0000922	CC	spindle pole	156	24	0.00526271052828262	1
GO:0022836	MF	gated channel activity	317	47	0.00532627308680695	1
GO:0002548	BP	monocyte chemotaxis	65	11	0.0053275778109919	1
GO:0035418	BP	protein localization to synapse	81	17	0.00535448609608201	1
GO:0004967	MF	glucagon receptor activity	2	2	0.00537073058978594	1
GO:0018146	BP	keratan sulfate biosynthetic process	27	7	0.00543161228235144	1
GO:0032433	CC	filopodium tip	17	6	0.00548330592509284	1
GO:0008568	MF	microtubule-severing ATPase activity	9	4	0.00553721850323708	1
GO:0043555	BP	regulation of translation in response to stress	18	6	0.00556410062933214	1
GO:0005856	CC	cytoskeleton	2140	228	0.00568300912338238	1
GO:0033504	BP	floor plate development	8	4	0.00575306259211296	1
GO:0048247	BP	lymphocyte chemotaxis	61	10	0.0058948035143875	1
GO:0061982	BP	meiosis I cell cycle process	118	18	0.00594556114837242	1
GO:0031109	BP	microtubule polymerization or depolymerization	109	19	0.00637974755775434	1
GO:0006617	BP	SRP-dependent cotranslational protein targeting to membrane	signal sequence recognition	2	2	0.00669635429520665	1
GO:0051642	BP	centrosome localization	30	8	0.00670942526762468	1
GO:0150172	BP	regulation of phosphatidylcholine metabolic process	8	4	0.00676038247510334	1
GO:1904383	BP	response to sodium phosphate	2	2	0.00681079122153446	1
GO:0031122	BP	cytoplasmic microtubule organization	63	13	0.006996101040949	1
GO:0005875	CC	microtubule associated complex	153	24	0.00710189006591827	1
GO:0005262	MF	calcium channel activity	115	21	0.00712354010893436	1
GO:0060998	BP	regulation of dendritic spine development	68	15	0.00727088550582898	1
GO:0046470	BP	phosphatidylcholine metabolic process	86	15	0.00738816602890798	1
GO:0019208	MF	phosphatase regulator activity	94	17	0.00748414748308311	1
GO:0036148	BP	phosphatidylglycerol acyl-chain remodeling	18	5	0.00759482311941952	1
GO:0061842	BP	microtubule organizing center localization	31	8	0.0077451622808265	1
GO:0007127	BP	meiosis I	113	17	0.00814543886229394	1
GO:0010882	BP	regulation of cardiac muscle contraction by calcium ion signaling	27	7	0.00820886842300613	1
GO:0045900	BP	negative regulation of translational elongation	5	3	0.00823960583532285	1
GO:0021773	BP	striatal medium spiny neuron differentiation	4	3	0.00825469739810222	1
GO:0014808	BP	release of sequestered calcium ion into cytosol by sarcoplasmic reticulum	34	8	0.00836311067399935	1
GO:0090151	BP	establishment of protein localization to mitochondrial membrane	48	10	0.00849162763786409	1
GO:1902414	BP	protein localization to cell junction	100	19	0.0085606194213537	1
GO:0005819	CC	spindle	345	44	0.00862327152962384	1
GO:0010881	BP	regulation of cardiac muscle contraction by regulation of the release of sequestered calcium ion	22	6	0.00890043867682471	1
GO:1902749	BP	regulation of cell cycle G2/M phase transition	206	29	0.00890187052479459	1
GO:0030160	MF	synaptic receptor adaptor activity	4	3	0.00891079684603661	1
GO:0048686	BP	regulation of sprouting of injured axon	4	3	0.00902504740626276	1
GO:0048690	BP	regulation of axon extension involved in regeneration	4	3	0.00902504740626276	1
GO:0015630	CC	microtubule cytoskeleton	1192	132	0.00915184451707149	1
GO:0044770	BP	cell cycle phase transition	617	72	0.0092229192895741	1
GO:0035637	BP	multicellular organismal signaling	198	31	0.00922865761763765	1
GO:0071107	BP	response to parathyroid hormone	10	4	0.00922949771382471	1
GO:0030414	MF	peptidase inhibitor activity	174	22	0.0092971909314377	1
GO:0043021	MF	ribonucleoprotein complex binding	123	19	0.00934580543784579	1
GO:1903514	BP	release of sequestered calcium ion into cytosol by endoplasmic reticulum	35	8	0.00935886808222263	1
GO:1901988	BP	negative regulation of cell cycle phase transition	260	34	0.00986448254669627	1
GO:0034230	BP	enkephalin processing	2	2	0.00990737897120707	1
GO:0006977	BP	DNA damage response	signal transduction by p53 class mediator resulting in cell cycle arrest	56	11	0.00993840721112237	1
GO:0072401	BP	signal transduction involved in DNA integrity checkpoint	72	13	0.0102192660139486	1
GO:0072422	BP	signal transduction involved in DNA damage checkpoint	72	13	0.0102192660139486	1
GO:0007010	BP	cytoskeleton organization	1328	152	0.0105693516100864	1
GO:0062023	CC	collagen-containing extracellular matrix	404	52	0.0105731508707825	1
GO:0070192	BP	chromosome organization involved in meiotic cell cycle	65	11	0.0108340666469023	1
GO:0005249	MF	voltage-gated potassium channel activity	83	16	0.0108904562640686	1
GO:0060996	BP	dendritic spine development	89	18	0.0109794882873853	1
GO:0016713	MF	oxidoreductase activity	acting on paired donors	with incorporation or reduction of molecular oxygen	reduced iron-sulfur protein as one donor	and incorporation of one atom of oxygen	9	3	0.0112877442863892	1
GO:0005261	MF	cation channel activity	321	45	0.0113510579309362	1
GO:0030015	CC	CCR4-NOT core complex	6	3	0.0114091293717046	1
GO:0071158	BP	positive regulation of cell cycle arrest	80	14	0.0115483966598503	1
GO:0070507	BP	regulation of microtubule cytoskeleton organization	182	27	0.0116267694875102	1
GO:0072395	BP	signal transduction involved in cell cycle checkpoint	73	13	0.0118217033707468	1
GO:0008219	BP	cell death	2137	222	0.0118444917464012	1
GO:0004653	MF	polypeptide N-acetylgalactosaminyltransferase activity	19	6	0.0118919811152902	1
GO:0072431	BP	signal transduction involved in mitotic G1 DNA damage checkpoint	57	11	0.0119882697666893	1
GO:1902400	BP	intracellular signal transduction involved in G1 DNA damage checkpoint	57	11	0.0119882697666893	1
GO:0000801	CC	central element	7	3	0.0120725473530138	1
GO:0061134	MF	peptidase regulator activity	213	26	0.0120906660019929	1
GO:0045143	BP	homologous chromosome segregation	58	10	0.0121022148777405	1
GO:0004972	MF	NMDA glutamate receptor activity	8	4	0.0122610179258507	1
GO:0021633	BP	optic nerve structural organization	2	2	0.012571481994255	1
GO:0004866	MF	endopeptidase inhibitor activity	169	21	0.0125898613724685	1
GO:0046471	BP	phosphatidylglycerol metabolic process	33	7	0.0126661785575733	1
GO:0008376	MF	acetylgalactosaminyltransferase activity	46	10	0.0127880622115886	1
GO:0010998	BP	regulation of translational initiation by eIF2 alpha phosphorylation	10	4	0.0129111831479658	1
GO:0061135	MF	endopeptidase regulator activity	178	22	0.0129545741766291	1
GO:0045104	BP	intermediate filament cytoskeleton organization	49	10	0.0130912160359571	1
GO:0034762	BP	regulation of transmembrane transport	545	69	0.0132151053936697	1
GO:0071963	BP	establishment or maintenance of cell polarity regulating cell shape	2	2	0.0133254140821284	1
GO:1901523	BP	icosanoid catabolic process	8	3	0.013365816841074	1
GO:0032202	BP	telomere assembly	7	3	0.0133715265929673	1
GO:0000226	BP	microtubule cytoskeleton organization	562	67	0.0134505205119242	1
GO:1904526	BP	regulation of microtubule binding	10	4	0.0136948015211679	1
GO:0021935	BP	cerebellar granule cell precursor tangential migration	2	2	0.0137201955972918	1
GO:1904064	BP	positive regulation of cation transmembrane transport	136	21	0.01389235513994	1
GO:0060631	BP	regulation of meiosis I	8	3	0.0139706288001923	1
GO:0035684	BP	helper T cell extravasation	3	2	0.0140653806942804	1
GO:0000711	BP	meiotic DNA repair synthesis	3	2	0.0140733786960647	1
GO:0051204	BP	protein insertion into mitochondrial membrane	44	9	0.0140783907911343	1
GO:0031056	BP	regulation of histone modification	140	22	0.0140792671826711	1
GO:0004867	MF	serine-type endopeptidase inhibitor activity	91	13	0.0141459257458825	1
GO:0021767	BP	mammillary body development	2	2	0.0141521469210671	1
GO:0061373	BP	mammillary axonal complex development	2	2	0.0141521469210671	1
GO:0072413	BP	signal transduction involved in mitotic cell cycle checkpoint	59	11	0.0142489909364508	1
GO:1902402	BP	signal transduction involved in mitotic DNA damage checkpoint	59	11	0.0142489909364508	1
GO:1902403	BP	signal transduction involved in mitotic DNA integrity checkpoint	59	11	0.0142489909364508	1
GO:0045103	BP	intermediate filament-based process	50	10	0.0145645706004641	1
GO:0021602	BP	cranial nerve morphogenesis	28	8	0.0145694339615542	1
GO:0010880	BP	regulation of release of sequestered calcium ion into cytosol by sarcoplasmic reticulum	30	7	0.0150011481026603	1
GO:0022402	BP	cell cycle process	1354	142	0.0150536664012668	1
GO:0070330	MF	aromatase activity	25	5	0.015137189708923	1
GO:0060932	BP	His-Purkinje system cell differentiation	2	2	0.015391710803833	1
GO:0048677	BP	axon extension involved in regeneration	5	3	0.0154320164427772	1
GO:0048682	BP	sprouting of injured axon	5	3	0.0154320164427772	1
GO:0099094	MF	ligand-gated cation channel activity	104	18	0.0154353614710863	1
GO:1990037	CC	Lewy body core	3	2	0.0157190731065699	1
GO:0042339	BP	keratan sulfate metabolic process	32	7	0.0157303590801039	1
GO:0004869	MF	cysteine-type endopeptidase inhibitor activity	54	9	0.0160209100207055	1
GO:0047498	MF	calcium-dependent phospholipase A2 activity	16	4	0.016046030508226	1
GO:0001740	CC	Barr body	6	3	0.0162669595002552	1
GO:1990868	BP	response to chemokine	94	13	0.0167509436461475	1
GO:1990869	BP	cellular response to chemokine	94	13	0.0167509436461475	1
GO:0045132	BP	meiotic chromosome segregation	88	13	0.0167555993166228	1
GO:0098976	BP	excitatory chemical synaptic transmission	8	4	0.0167820559916579	1
GO:0006040	BP	amino sugar metabolic process	39	8	0.0168188374404697	1
GO:0007130	BP	synaptonemal complex assembly	20	5	0.0168430920905523	1
GO:1901569	BP	fatty acid derivative catabolic process	13	4	0.0169004221228401	1
GO:0038187	MF	pattern recognition receptor activity	21	5	0.0170510170463566	1
GO:0004970	MF	ionotropic glutamate receptor activity	18	6	0.0171186035044243	1
GO:0010466	BP	negative regulation of peptidase activity	249	29	0.0173549913493991	1
GO:0015085	MF	calcium ion transmembrane transporter activity	130	22	0.0174037668611692	1
GO:0036150	BP	phosphatidylserine acyl-chain remodeling	21	5	0.0174276273050616	1
GO:0090150	BP	establishment of protein localization to membrane	315	38	0.0177555388661386	1
GO:0031444	BP	slow-twitch skeletal muscle fiber contraction	3	2	0.0179260727200367	1
GO:0017046	MF	peptide hormone binding	49	10	0.0180109678657336	1
GO:0055074	BP	calcium ion homeostasis	444	54	0.0181048312071002	1
GO:0044772	BP	mitotic cell cycle phase transition	577	66	0.0181589227598529	1
GO:0120103	CC	centriolar subdistal appendage	8	3	0.0183026100878383	1
GO:0038024	MF	cargo receptor activity	68	12	0.0184210060950462	1
GO:0017053	CC	transcription repressor complex	71	14	0.0184502053899149	1
GO:0036284	CC	tubulobulbar complex	2	2	0.0191580843752261	1
GO:1901991	BP	negative regulation of mitotic cell cycle phase transition	244	31	0.019169260638408	1
GO:0051124	BP	synaptic growth at neuromuscular junction	10	4	0.0196333799203644	1
GO:0004477	MF	methenyltetrahydrofolate cyclohydrolase activity	3	2	0.0196954718232786	1
GO:0004486	MF	methylenetetrahydrofolate dehydrogenase [NAD(P)+] activity	3	2	0.0196954718232786	1
GO:0004487	MF	methylenetetrahydrofolate dehydrogenase (NAD+) activity	3	2	0.0196954718232786	1
GO:0004488	MF	methylenetetrahydrofolate dehydrogenase (NADP+) activity	3	2	0.0196954718232786	1
GO:0021540	BP	corpus callosum morphogenesis	6	3	0.0197093148056176	1
GO:0099612	BP	protein localization to axon	10	4	0.0198009450308148	1
GO:0070296	BP	sarcoplasmic reticulum calcium ion transport	39	8	0.0198747539425925	1
GO:0019789	MF	SUMO transferase activity	17	5	0.0199580794323562	1
GO:0031726	MF	CCR1 chemokine receptor binding	5	2	0.0200626968141309	1
GO:0036100	BP	leukotriene catabolic process	5	2	0.0201425327359754	1
GO:0036101	BP	leukotriene B4 catabolic process	5	2	0.0201425327359754	1
GO:0036102	BP	leukotriene B4 metabolic process	5	2	0.0201425327359754	1
GO:0050051	MF	leukotriene-B4 20-monooxygenase activity	5	2	0.0201425327359754	1
GO:0043449	BP	cellular alkene metabolic process	2	2	0.0202186998420498	1
GO:0018894	BP	dibenzo-p-dioxin metabolic process	3	2	0.0210597402192175	1
GO:0008282	CC	inward rectifying potassium channel	3	2	0.0210639586230832	1
GO:0043486	BP	histone exchange	53	9	0.0211024863500413	1
GO:0060314	BP	regulation of ryanodine-sensitive calcium-release channel activity	24	6	0.0212867237255303	1
GO:0090307	BP	mitotic spindle assembly	60	10	0.0214716838461374	1
GO:0140013	BP	meiotic nuclear division	171	22	0.0214819154732569	1
GO:0097267	BP	omega-hydroxylase P450 pathway	9	3	0.0215097193084789	1
GO:0006658	BP	phosphatidylserine metabolic process	34	7	0.0216524124427108	1
GO:0005813	CC	centrosome	559	64	0.0216580672485283	1
GO:0030942	MF	endoplasmic reticulum signal peptide binding	3	2	0.0217061134013732	1
GO:0007129	BP	homologous chromosome pairing at meiosis	46	8	0.0219264752717347	1
GO:0097553	BP	calcium ion transmembrane import into cytosol	136	21	0.0223591696007735	1
GO:2000810	BP	regulation of bicellular tight junction assembly	23	6	0.0223696519956069	1
GO:0051013	BP	microtubule severing	12	4	0.0224529971350874	1
GO:0048687	BP	positive regulation of sprouting of injured axon	2	2	0.0224624447774909	1
GO:0048691	BP	positive regulation of axon extension involved in regeneration	2	2	0.0224624447774909	1
GO:1990518	MF	single-stranded 3'-5' DNA helicase activity	3	2	0.0226137354262854	1
GO:0006955	BP	immune response	1883	178	0.0226995412044659	1
GO:0003688	MF	DNA replication origin binding	22	5	0.0228201794513774	1
GO:0007158	BP	neuron cell-cell adhesion	14	5	0.0228208160464304	1
GO:0035093	BP	spermatogenesis	exchange of chromosomal proteins	8	3	0.0229539207565083	1
GO:0051365	BP	cellular response to potassium ion starvation	3	2	0.0231806704061691	1
GO:0006874	BP	cellular calcium ion homeostasis	432	52	0.0233541357925867	1
GO:0043269	BP	regulation of ion transport	668	80	0.0233683452133259	1
GO:0019722	BP	calcium-mediated signaling	214	29	0.023396411389405	1
GO:0043559	MF	insulin binding	6	3	0.023489193424579	1
GO:0031997	MF	N-terminal myristoylation domain binding	3	2	0.0238381467402655	1
GO:0048513	BP	animal organ development	3480	356	0.0239164287195737	1
GO:0022617	BP	extracellular matrix disassembly	78	13	0.0241029656484217	1
GO:0022406	BP	membrane docking	175	24	0.0242429638344459	1
GO:0006267	BP	pre-replicative complex assembly involved in nuclear cell cycle DNA replication	8	3	0.0245742519339939	1
GO:0036388	BP	pre-replicative complex assembly	8	3	0.0245742519339939	1
GO:1902299	BP	pre-replicative complex assembly involved in cell cycle DNA replication	8	3	0.0245742519339939	1
GO:1900045	BP	negative regulation of protein K63-linked ubiquitination	9	3	0.0247413935039886	1
GO:0034764	BP	positive regulation of transmembrane transport	196	27	0.025099543805641	1
GO:1901987	BP	regulation of cell cycle phase transition	463	53	0.0253405097139658	1
GO:0072657	BP	protein localization to membrane	615	72	0.0253728588274529	1
GO:0030020	MF	extracellular matrix structural constituent conferring tensile strength	39	9	0.0253864015204529	1
GO:0006123	BP	mitochondrial electron transport	cytochrome c to oxygen	16	4	0.0256284202912376	1
GO:0019646	BP	aerobic electron transport chain	16	4	0.0256284202912376	1
GO:0006684	BP	sphingomyelin metabolic process	13	4	0.0256898543666022	1
GO:0099175	BP	regulation of postsynapse organization	99	17	0.0258114946471411	1
GO:0140056	BP	organelle localization by membrane tethering	167	23	0.0261651136036677	1
GO:0030312	CC	external encapsulating structure	5	2	0.0263124401196932	1
GO:0035805	CC	egg coat	5	2	0.0263124401196932	1
GO:0033692	BP	cellular polysaccharide biosynthetic process	69	12	0.0263491966226643	1
GO:1903539	BP	protein localization to postsynaptic membrane	41	9	0.0263777270908254	1
GO:0051321	BP	meiotic cell cycle	241	29	0.0264928294232125	1
GO:0046873	MF	metal ion transmembrane transporter activity	411	53	0.0265012940710138	1
GO:0042631	BP	cellular response to water deprivation	3	2	0.0267894593192104	1
GO:0032190	MF	acrosin binding	5	2	0.0268364839670656	1
GO:0021563	BP	glossopharyngeal nerve development	5	3	0.0269404111067303	1
GO:0051205	BP	protein insertion into membrane	63	11	0.0270614187291719	1
GO:0031727	MF	CCR2 chemokine receptor binding	6	2	0.0270910418500803	1
GO:0010951	BP	negative regulation of endopeptidase activity	236	27	0.0272990768086761	1
GO:0008745	MF	N-acetylmuramoyl-L-alanine amidase activity	4	2	0.0273279314863663	1
GO:0072509	MF	divalent inorganic cation transmembrane transporter activity	156	24	0.0276625713555745	1
GO:0019373	BP	epoxygenase P450 pathway	18	4	0.0278493700004037	1
GO:0006656	BP	phosphatidylcholine biosynthetic process	38	8	0.028000108707902	1
GO:0004623	MF	phospholipase A2 activity	33	6	0.0282347681199558	1
GO:1903237	BP	negative regulation of leukocyte tethering or rolling	4	2	0.0284216242270881	1
GO:0031937	BP	positive regulation of chromatin silencing	3	2	0.0284575925257895	1
GO:0099575	BP	regulation of protein catabolic process at presynapse	modulating synaptic transmission	3	2	0.0285449421348047	1
GO:0031571	BP	mitotic G1 DNA damage checkpoint	63	11	0.0286334087283038	1
GO:0099173	BP	postsynapse organization	156	25	0.0287712439682062	1
GO:0048025	BP	negative regulation of mRNA splicing	via spliceosome	19	5	0.0289508107476085	1
GO:0008328	CC	ionotropic glutamate receptor complex	45	10	0.0289548946537673	1
GO:2001259	BP	positive regulation of cation channel activity	71	12	0.0290964007245681	1
GO:0032056	BP	positive regulation of translation in response to stress	7	3	0.0293055363996151	1
GO:0005956	CC	protein kinase CK2 complex	3	2	0.0294109299871645	1
GO:0004321	MF	fatty-acyl-CoA synthase activity	6	2	0.0295992624733707	1
GO:0086064	BP	cell communication by electrical coupling involved in cardiac conduction	24	6	0.0296438145269964	1
GO:0060732	BP	positive regulation of inositol phosphate biosynthetic process	14	4	0.029752762792813	1
GO:0007140	BP	male meiotic nuclear division	45	8	0.0303368432565282	1
GO:1903046	BP	meiotic cell cycle process	186	23	0.030369793575565	1
GO:0060903	BP	positive regulation of meiosis I	4	2	0.0305675750602765	1
GO:0010715	BP	regulation of extracellular matrix disassembly	16	5	0.0305893229426618	1
GO:0010389	BP	regulation of G2/M transition of mitotic cell cycle	190	25	0.0306303816552014	1
GO:0070830	BP	bicellular tight junction assembly	73	12	0.0306999917639259	1
GO:0048096	BP	chromatin-mediated maintenance of transcription	13	4	0.0307170332652324	1
GO:0072683	BP	T cell extravasation	10	3	0.0307613205884322	1
GO:0001673	CC	male germ cell nucleus	15	4	0.03081184055342	1
GO:0043270	BP	positive regulation of ion transport	268	34	0.0308131838707486	1
GO:2000134	BP	negative regulation of G1/S transition of mitotic cell cycle	122	17	0.0308330520338967	1
GO:0010899	BP	regulation of phosphatidylcholine catabolic process	3	2	0.0308783871524208	1
GO:0034368	BP	protein-lipid complex remodeling	31	6	0.0309196781474304	1
GO:0034369	BP	plasma lipoprotein particle remodeling	31	6	0.0309196781474304	1
GO:0060002	MF	plus-end directed microfilament motor activity	3	2	0.0309209060152837	1
GO:0032886	BP	regulation of microtubule-based process	228	30	0.031030821475337	1
GO:0044819	BP	mitotic G1/S transition checkpoint	64	11	0.0311332996476086	1
GO:0048704	BP	embryonic skeletal system morphogenesis	96	18	0.0311871054920049	1
GO:0150094	BP	amyloid-beta clearance by cellular catabolic process	7	3	0.0312546449428598	1
GO:2001257	BP	regulation of cation channel activity	173	25	0.0314357864572173	1
GO:0007026	BP	negative regulation of microtubule depolymerization	23	6	0.0316734490351062	1
GO:0017018	MF	myosin phosphatase activity	4	2	0.0319575688845615	1
GO:0005044	MF	scavenger receptor activity	43	8	0.0320351452872417	1
GO:0060836	BP	lymphatic endothelial cell differentiation	7	3	0.0322411651581966	1
GO:0098901	BP	regulation of cardiac muscle cell action potential	32	7	0.0324599356905089	1
GO:0015271	MF	outward rectifier potassium channel activity	12	4	0.0324831969687503	1
GO:0002950	MF	ceramide phosphoethanolamine synthase activity	3	2	0.0325296085765306	1
GO:0033188	MF	sphingomyelin synthase activity	3	2	0.0325296085765306	1
GO:0047493	MF	ceramide cholinephosphotransferase activity	3	2	0.0325296085765306	1
GO:0021631	BP	optic nerve morphogenesis	6	3	0.0327850737051507	1
GO:0003777	MF	microtubule motor activity	75	13	0.0328730403086875	1
GO:0001540	MF	amyloid-beta binding	72	13	0.0329401006461601	1
GO:0044783	BP	G1 DNA damage checkpoint	64	11	0.0330308025291338	1
GO:0099738	CC	cell cortex region	42	9	0.0332562737254468	1
GO:0046602	BP	regulation of mitotic centrosome separation	9	3	0.0333796892950591	1
GO:0031110	BP	regulation of microtubule polymerization or depolymerization	78	13	0.0335879084495355	1
GO:1990456	BP	mitochondrion-endoplasmic reticulum membrane tethering	3	2	0.0335893606470336	1
GO:1901990	BP	regulation of mitotic cell cycle phase transition	430	49	0.0336477293767998	1
GO:0009888	BP	tissue development	2007	211	0.0336835305438241	1
GO:0031010	CC	ISWI-type complex	10	3	0.0337740896585905	1
GO:0034584	MF	piRNA binding	4	2	0.0338428890607451	1
GO:0031112	BP	positive regulation of microtubule polymerization or depolymerization	33	7	0.0342579111495998	1
GO:0044295	CC	axonal growth cone	28	7	0.0343478656567477	1
GO:0043621	MF	protein self-association	56	10	0.0343666623535648	1
GO:0098878	CC	neurotransmitter receptor complex	47	10	0.034564517653408	1
GO:0070050	BP	neuron cellular homeostasis	32	7	0.0347142483790848	1
GO:0030286	CC	dynein complex	51	9	0.0347629614152362	1
GO:0030854	BP	positive regulation of granulocyte differentiation	8	3	0.0348781370060502	1
GO:0070570	BP	regulation of neuron projection regeneration	30	7	0.0349303915688216	1
GO:0034367	BP	protein-containing complex remodeling	32	6	0.0349952355031132	1
GO:0097413	CC	Lewy body	8	3	0.0350487345935818	1
GO:0102567	MF	phospholipase A2 activity (consuming 1	2-dipalmitoylphosphatidylcholine)	26	5	0.0350504439161842	1
GO:0102568	MF	phospholipase A2 activity consuming 1	2-dioleoylphosphatidylethanolamine)	26	5	0.0350504439161842	1
GO:0048532	BP	anatomical structure arrangement	16	5	0.0351804779527248	1
GO:0071415	BP	cellular response to purine-containing compound	13	4	0.0351815438811999	1
GO:0004857	MF	enzyme inhibitor activity	362	40	0.0352221809368481	1
GO:0051293	BP	establishment of spindle localization	45	9	0.0353269183265002	1
GO:0051647	BP	nucleus localization	28	7	0.0355789756917561	1
GO:1901071	BP	glucosamine-containing compound metabolic process	24	5	0.0356968143125794	1
GO:0008066	MF	glutamate receptor activity	26	7	0.0358580336863383	1
GO:0015276	MF	ligand-gated ion channel activity	131	20	0.0362839475896799	1
GO:0022834	MF	ligand-gated channel activity	131	20	0.0362839475896799	1
GO:0071374	BP	cellular response to parathyroid hormone stimulus	8	3	0.0362860297418539	1
GO:0034767	BP	positive regulation of ion transmembrane transport	150	21	0.0364719451041106	1
GO:0098698	BP	postsynaptic specialization assembly	21	6	0.0365739084613978	1
GO:0021934	BP	hindbrain tangential cell migration	3	2	0.0367285347885496	1
GO:0015267	MF	channel activity	453	55	0.0367867717183372	1
GO:0098644	CC	complex of collagen trimers	19	5	0.0368153897904189	1
GO:0061002	BP	negative regulation of dendritic spine morphogenesis	6	3	0.03685215333046	1
GO:0010769	BP	regulation of cell morphogenesis involved in differentiation	289	42	0.0368692553658862	1
GO:0005200	MF	structural constituent of cytoskeleton	98	15	0.0370147325845347	1
GO:0010644	BP	cell communication by electrical coupling	31	7	0.0370150774248889	1
GO:0019226	BP	transmission of nerve impulse	71	12	0.0371880704028588	1
GO:0071346	BP	cellular response to interferon-gamma	174	22	0.0373800347171999	1
GO:0120192	BP	tight junction assembly	75	12	0.0374521467697035	1
GO:0036149	BP	phosphatidylinositol acyl-chain remodeling	18	4	0.0377638921255714	1
GO:0042752	BP	regulation of circadian rhythm	117	18	0.0379652865659541	1
GO:0007289	BP	spermatid nucleus differentiation	23	5	0.0379748043294507	1
GO:0022803	MF	passive transmembrane transporter activity	454	55	0.0380077205878916	1
GO:0007612	BP	learning	140	22	0.0382336536978603	1
GO:0051640	BP	organelle localization	623	71	0.0382506406023669	1
GO:1990425	CC	ryanodine receptor complex	3	2	0.0383844352687379	1
GO:1990823	BP	response to leukemia inhibitory factor	93	15	0.0386391393455875	1
GO:1990830	BP	cellular response to leukemia inhibitory factor	93	15	0.0386391393455875	1
GO:1902807	BP	negative regulation of cell cycle G1/S phase transition	126	17	0.0390860223205846	1
GO:0034705	CC	potassium channel complex	92	16	0.0392150729514856	1
GO:0031848	BP	protection from non-homologous end joining at telomere	10	3	0.0392307021608351	1
GO:1903542	BP	negative regulation of exosomal secretion	3	2	0.0394190398678419	1
GO:0072507	BP	divalent inorganic cation homeostasis	486	56	0.0395080834899236	1
GO:1900673	BP	olefin metabolic process	3	2	0.0395964543412954	1
GO:0045179	CC	apical cortex	9	3	0.039785739593951	1
GO:0051968	BP	positive regulation of synaptic transmission	glutamatergic	31	7	0.040222924308034	1
GO:0033128	BP	negative regulation of histone phosphorylation	3	2	0.0403173090287562	1
GO:1903423	BP	positive regulation of synaptic vesicle recycling	9	3	0.0404409376846636	1
GO:0101021	MF	estrogen 2-hydroxylase activity	5	2	0.0408116003136472	1
GO:0090176	BP	microtubule cytoskeleton organization involved in establishment of planar polarity	3	2	0.0408785094876395	1
GO:0001972	MF	retinoic acid binding	20	5	0.0410697870933813	1
GO:0004679	MF	AMP-activated protein kinase activity	10	3	0.0413734893752739	1
GO:1903779	BP	regulation of cardiac conduction	70	12	0.0415079489388105	1
GO:0007097	BP	nuclear migration	23	6	0.0415481676132531	1
GO:0060315	BP	negative regulation of ryanodine-sensitive calcium-release channel activity	10	3	0.0418365659876595	1
GO:0005216	MF	ion channel activity	410	51	0.0418367070286307	1
GO:0009311	BP	oligosaccharide metabolic process	52	9	0.0420786643501626	1
GO:0030199	BP	collagen fibril organization	53	10	0.0421349813739286	1
GO:0070062	CC	extracellular exosome	2039	198	0.0421730210758946	1
GO:0016019	MF	peptidoglycan immune receptor activity	5	2	0.0422479835129542	1
GO:0045211	CC	postsynaptic membrane	261	37	0.042618413604449	1
GO:0005976	BP	polysaccharide metabolic process	106	16	0.0426356941328584	1
GO:0035976	CC	transcription factor AP-1 complex	4	2	0.0426903062751606	1
GO:0030226	MF	apolipoprotein receptor activity	3	2	0.0429972908352981	1
GO:0005579	CC	membrane attack complex	7	2	0.0430308533094876	1
GO:0021801	BP	cerebral cortex radial glia guided migration	23	6	0.043096877995877	1
GO:0022030	BP	telencephalon glial cell migration	23	6	0.043096877995877	1
GO:0060838	BP	lymphatic endothelial cell fate commitment	3	2	0.0433300823890897	1
GO:0060402	BP	calcium ion transport into cytosol	154	22	0.0433506700866307	1
GO:0051342	BP	regulation of cyclic-nucleotide phosphodiesterase activity	9	3	0.043629518373345	1
GO:0010522	BP	regulation of calcium ion transport into cytosol	99	15	0.0436727106141112	1
GO:0006660	BP	phosphatidylserine catabolic process	4	2	0.0438147015230179	1
GO:0009312	BP	oligosaccharide biosynthetic process	17	4	0.0438220352033883	1
GO:0043525	BP	positive regulation of neuron apoptotic process	56	10	0.0438417548545118	1
GO:0071345	BP	cellular response to cytokine stimulus	1070	107	0.0438899035638704	1
GO:0048814	BP	regulation of dendrite morphogenesis	84	15	0.0439958609765865	1
GO:0010900	BP	negative regulation of phosphatidylcholine catabolic process	1	1	0.0443473388774928	1
GO:0051346	BP	negative regulation of hydrolase activity	437	47	0.044500306795264	1
GO:0071462	BP	cellular response to water stimulus	4	2	0.0445837476055612	1
GO:0071156	BP	regulation of cell cycle arrest	103	15	0.044702510354286	1
GO:0097120	BP	receptor localization to synapse	53	10	0.0450606203217203	1
GO:0003091	BP	renal water homeostasis	36	7	0.0451264342030796	1
GO:0051225	BP	spindle assembly	109	15	0.0452099930166105	1
GO:0035523	BP	protein K29-linked deubiquitination	4	2	0.04525439158686	1
GO:0006044	BP	N-acetylglucosamine metabolic process	17	4	0.0456876025722506	1
GO:0006842	BP	tricarboxylic acid transport	4	2	0.0457990043425099	1
GO:0015137	MF	citrate transmembrane transporter activity	4	2	0.0457990043425099	1
GO:0015142	MF	tricarboxylic acid transmembrane transporter activity	4	2	0.0457990043425099	1
GO:0015746	BP	citrate transport	4	2	0.0457990043425099	1
GO:0005726	CC	perichromatin fibrils	5	2	0.0459300481982957	1
GO:0007050	BP	cell cycle arrest	228	29	0.0460487208816331	1
GO:0045861	BP	negative regulation of proteolysis	336	36	0.046054895915999	1
GO:0048680	BP	positive regulation of axon regeneration	9	3	0.0461430595857761	1
GO:0120193	BP	tight junction organization	78	12	0.0464699674077291	1
GO:0018345	BP	protein palmitoylation	32	6	0.0465494023848719	1
GO:0062237	BP	protein localization to postsynapse	45	9	0.046803285161258	1
GO:0051489	BP	regulation of filopodium assembly	43	9	0.0470323148265263	1
GO:0043186	CC	P granule	17	4	0.0470411071741718	1
GO:0060293	CC	germ plasm	17	4	0.0470411071741718	1
GO:0070588	BP	calcium ion transmembrane transport	299	38	0.047105054486543	1
GO:0007052	BP	mitotic spindle organization	111	15	0.0471463910895073	1
GO:0046904	MF	calcium oxalate binding	1	1	0.0472539026030971	1
GO:0015278	MF	calcium-release channel activity	17	5	0.0474710402246432	1
GO:0000235	CC	astral microtubule	10	3	0.0478373988404771	1
GO:0005818	CC	aster	10	3	0.0478373988404771	1
GO:0070552	CC	BRISC complex	4	2	0.0482277750689555	1
GO:0071674	BP	mononuclear cell migration	95	12	0.0483181480501543	1
GO:0031856	MF	parathyroid hormone receptor binding	1	1	0.0483510509938936	1
GO:0031857	MF	type 1 parathyroid hormone receptor binding	1	1	0.0483510509938936	1
GO:1902275	BP	regulation of chromatin organization	185	24	0.0485553461393575	1
GO:0001228	MF	DNA-binding transcription activator activity	RNA polymerase II-specific	492	61	0.0487049630211514	1
GO:0072503	BP	cellular divalent inorganic cation homeostasis	467	53	0.0487665317658322	1
GO:0032593	CC	insulin-responsive compartment	10	3	0.0488206080109944	1
GO:2000463	BP	positive regulation of excitatory postsynaptic potential	27	7	0.0488993893212145	1
GO:1902816	BP	regulation of protein localization to microtubule	5	2	0.0489249977329451	1
GO:1902817	BP	negative regulation of protein localization to microtubule	5	2	0.0489249977329451	1
GO:0032414	BP	positive regulation of ion transmembrane transporter activity	100	15	0.0491527051781477	1
GO:2000756	BP	regulation of peptidyl-lysine acetylation	59	10	0.0491648553116798	1
GO:0071837	MF	HMG box domain binding	16	5	0.0493556413400203	1
GO:0045654	BP	positive regulation of megakaryocyte differentiation	9	3	0.0494914853536362	1
GO:0034465	BP	response to carbon monoxide	4	2	0.0495423532144115	1
GO:0090063	BP	positive regulation of microtubule nucleation	4	2	0.0495996613677445	1
GO:0033183	BP	negative regulation of histone ubiquitination	4	2	0.0496118988580783	1
GO:1901314	BP	regulation of histone H2A K63-linked ubiquitination	4	2	0.0496118988580783	1
GO:1901315	BP	negative regulation of histone H2A K63-linked ubiquitination	4	2	0.0496118988580783	1
GO:0005614	CC	interstitial matrix	13	4	0.0496983589243811	1
GO:0044325	MF	ion channel binding	124	19	0.0497447373089454	1
GO:0032809	CC	neuronal cell body membrane	28	6	0.0497647756868108	1
GO:0030010	BP	establishment of cell polarity	137	21	0.0500001603501535	1
GO:0070307	BP	lens fiber cell development	14	4	0.0501500948448625	1
GO:0030306	MF	ADP-ribosylation factor binding	8	3	0.0502615334078007	1
GO:0034097	BP	response to cytokine	1154	114	0.0502902726932511	1
GO:0019369	BP	arachidonic acid metabolic process	54	8	0.0503128650506374	1
GO:0060228	MF	phosphatidylcholine-sterol O-acyltransferase activator activity	6	2	0.0503874334917687	1
GO:0097711	BP	ciliary basal body-plasma membrane docking	91	13	0.0507616745620826	1
GO:0060319	BP	primitive erythrocyte differentiation	3	2	0.0508142124294508	1
GO:0030104	BP	water homeostasis	78	12	0.0508288856636254	1
GO:0033326	BP	cerebrospinal fluid secretion	4	2	0.0509308292542474	1
GO:0010919	BP	regulation of inositol phosphate biosynthetic process	16	4	0.0510209024052214	1
GO:0097106	BP	postsynaptic density organization	30	7	0.0510863381776565	1
GO:0001766	BP	membrane raft polarization	4	2	0.0513547975288153	1
GO:0021554	BP	optic nerve development	13	4	0.0516444882938817	1
GO:0031057	BP	negative regulation of histone modification	42	8	0.0516512757306188	1
GO:0001867	BP	complement activation	lectin pathway	12	3	0.0516690792637386	1
GO:1902850	BP	microtubule cytoskeleton organization involved in mitosis	137	18	0.0518116048804663	1
GO:0061980	MF	regulatory RNA binding	39	7	0.0519237123725009	1
GO:0032596	BP	protein transport into membrane raft	4	2	0.0520286315232385	1
GO:0010523	BP	negative regulation of calcium ion transport into cytosol	17	4	0.0521249813747306	1
GO:0060999	BP	positive regulation of dendritic spine development	38	8	0.0521660958318571	1
GO:0000270	BP	peptidoglycan metabolic process	6	2	0.0522413255377503	1
GO:0009253	BP	peptidoglycan catabolic process	6	2	0.0522413255377503	1
GO:0051026	BP	chiasma assembly	5	2	0.052343887550319	1
GO:1900200	BP	mesenchymal cell apoptotic process involved in metanephros development	3	2	0.0523693797756842	1
GO:1900211	BP	regulation of mesenchymal cell apoptotic process involved in metanephros development	3	2	0.0523693797756842	1
GO:1900212	BP	negative regulation of mesenchymal cell apoptotic process involved in metanephros development	3	2	0.0523693797756842	1
GO:0031116	BP	positive regulation of microtubule polymerization	29	6	0.05239879012257	1
GO:0051262	BP	protein tetramerization	85	13	0.052477024071871	1
GO:0071827	BP	plasma lipoprotein particle organization	51	8	0.0525336270087139	1
GO:0001216	MF	DNA-binding transcription activator activity	495	61	0.0526006181639918	1
GO:0010159	BP	specification of animal organ position	3	2	0.0527843535345737	1
GO:2001263	BP	regulation of C-C chemokine binding	1	1	0.0527969156386889	1
GO:2001264	BP	negative regulation of C-C chemokine binding	1	1	0.0527969156386889	1
GO:0048511	BP	rhythmic process	296	37	0.0528844632949856	1
GO:0035235	BP	ionotropic glutamate receptor signaling pathway	25	6	0.0530044098134482	1
GO:0031995	MF	insulin-like growth factor II binding	8	3	0.0531476609513809	1
GO:0048408	MF	epidermal growth factor binding	4	2	0.0534513346882063	1
GO:0050891	BP	multicellular organismal water homeostasis	70	11	0.0539381316629031	1
GO:0007131	BP	reciprocal meiotic recombination	52	8	0.0539436019499532	1
GO:0016646	MF	oxidoreductase activity	acting on the CH-NH group of donors	NAD or NADP as acceptor	17	4	0.0541290414280443	1
GO:0032417	BP	positive regulation of sodium:proton antiporter activity	4	2	0.0541836705154578	1
GO:0061337	BP	cardiac conduction	141	21	0.0542468544968083	1
GO:0034341	BP	response to interferon-gamma	193	23	0.0543166958748069	1
GO:0051248	BP	negative regulation of protein metabolic process	1128	115	0.0543731868042463	1
GO:0005048	MF	signal sequence binding	48	8	0.0546232315294662	1
GO:0006778	BP	porphyrin-containing compound metabolic process	37	6	0.0546509876783508	1
GO:0010649	BP	regulation of cell communication by electrical coupling	14	4	0.0546544580384355	1
GO:0045495	CC	pole plasm	18	4	0.0547087929981289	1
GO:0035176	BP	social behavior	45	9	0.0547360236290092	1
GO:0060926	BP	cardiac pacemaker cell development	4	2	0.0549381812430974	1
GO:0048495	MF	Roundabout binding	8	3	0.055341210314156	1
GO:0009403	BP	toxin biosynthetic process	1	1	0.0554103539863589	1
GO:0071615	BP	oxidative deethylation	1	1	0.0554103539863589	1
GO:0051653	BP	spindle localization	50	9	0.0555735012612888	1
GO:0022029	BP	telencephalon cell migration	52	10	0.0555951882697352	1
GO:0008017	MF	microtubule binding	250	32	0.055684023572484	1
GO:0048705	BP	skeletal system morphogenesis	225	33	0.055865836545595	1
GO:0031685	MF	adenosine receptor binding	5	2	0.055975330107047	1
GO:0051279	BP	regulation of release of sequestered calcium ion into cytosol	79	12	0.0560576844674103	1
GO:0098966	CC	perisynaptic extracellular matrix	4	2	0.0562066492550413	1
GO:0099535	CC	synapse-associated extracellular matrix	4	2	0.0562066492550413	1
GO:0090297	BP	positive regulation of mitochondrial DNA replication	1	1	0.0563100673649879	1
GO:1900210	BP	positive regulation of cardiolipin metabolic process	1	1	0.0563100673649879	1
GO:1990046	BP	stress-induced mitochondrial fusion	1	1	0.0563100673649879	1
GO:0034112	BP	positive regulation of homotypic cell-cell adhesion	9	3	0.0564233421199476	1
GO:0033119	BP	negative regulation of RNA splicing	23	5	0.0564313688404312	1
GO:0035564	BP	regulation of kidney size	4	2	0.0565532444435196	1
GO:0070572	BP	positive regulation of neuron projection regeneration	10	3	0.056685671568376	1
GO:0016712	MF	oxidoreductase activity	acting on paired donors	with incorporation or reduction of molecular oxygen	reduced flavin or flavoprotein as one donor	and incorporation of one atom of oxygen	33	5	0.0568121032255279	1
GO:1902915	BP	negative regulation of protein polyubiquitination	11	3	0.0569532953407476	1
GO:0045040	BP	protein insertion into mitochondrial outer membrane	5	2	0.0570845266124386	1
GO:0033700	BP	phospholipid efflux	12	3	0.0573645980107319	1
GO:0021603	BP	cranial nerve formation	9	3	0.0574105649345515	1
GO:1903561	CC	extracellular vesicle	2123	201	0.0574204130665828	1
GO:0000271	BP	polysaccharide biosynthetic process	76	12	0.0574795827971847	1
GO:1902683	BP	regulation of receptor localization to synapse	15	4	0.0575770221834021	1
GO:0021859	BP	pyramidal neuron differentiation	8	3	0.0576496577089259	1
GO:0097503	BP	sialylation	20	5	0.0576881968927813	1
GO:0016589	CC	NURF complex	5	2	0.0577943366400341	1
GO:0050773	BP	regulation of dendrite development	141	22	0.0578176088898628	1
GO:0031114	BP	regulation of microtubule depolymerization	27	6	0.0579451838145263	1
GO:1990825	MF	sequence-specific mRNA binding	11	3	0.0582386123821986	1
GO:2000501	BP	regulation of natural killer cell chemotaxis	8	2	0.058431438145842	1
GO:0009303	BP	rRNA transcription	33	6	0.0586798379558032	1
GO:0043230	CC	extracellular organelle	2125	201	0.0588177595936897	1
GO:0051343	BP	positive regulation of cyclic-nucleotide phosphodiesterase activity	5	2	0.0588905829502071	1
GO:0097107	BP	postsynaptic density assembly	18	5	0.0589363469257352	1
GO:0005635	CC	nuclear envelope	450	50	0.0591638994808684	1
GO:0046348	BP	amino sugar catabolic process	12	3	0.0592373674606013	1
GO:0035825	BP	homologous recombination	53	8	0.0593974064454675	1
GO:0034399	CC	nuclear periphery	124	18	0.0598676568687048	1
GO:0019958	MF	C-X-C chemokine binding	6	2	0.0601635625819245	1
GO:0031111	BP	negative regulation of microtubule polymerization or depolymerization	34	7	0.0602600993666185	1
GO:0019238	MF	cyclohydrolase activity	5	2	0.0602794921165234	1
GO:0019321	BP	pentose metabolic process	11	3	0.0606159268642599	1
GO:0017083	MF	4-galactosyl-N-acetylglucosaminide 3-alpha-L-fucosyltransferase activity	6	2	0.0608993287323888	1
GO:0032980	BP	keratinocyte activation	1	1	0.0610269842731168	1
GO:0005871	CC	kinesin complex	50	9	0.0611483221164596	1
GO:0004630	MF	phospholipase D activity	5	2	0.0612547010811379	1
GO:0051294	BP	establishment of spindle orientation	36	7	0.0612569108569784	1
GO:0098815	BP	modulation of excitatory postsynaptic potential	43	9	0.0613818923059678	1
GO:1905034	BP	regulation of antifungal innate immune response	1	1	0.061507681957278	1
GO:1905036	BP	positive regulation of antifungal innate immune response	1	1	0.061507681957278	1
GO:1905164	BP	positive regulation of phagosome maturation	1	1	0.061507681957278	1
GO:0030017	CC	sarcomere	199	26	0.061824744756584	1
GO:0043417	BP	negative regulation of skeletal muscle tissue regeneration	1	1	0.0618715166043093	1
GO:0050808	BP	synapse organization	401	53	0.0622285609353288	1
GO:0008340	BP	determination of adult lifespan	17	4	0.0622715624096788	1
GO:0012501	BP	programmed cell death	2000	200	0.0625593347339073	1
GO:0001102	MF	RNA polymerase II activating transcription factor binding	46	9	0.0628236537362211	1
GO:0048156	MF	tau protein binding	44	8	0.0628623113013652	1
GO:0048679	BP	regulation of axon regeneration	27	6	0.0628838487731724	1
GO:0008373	MF	sialyltransferase activity	21	5	0.0630481371072514	1
GO:0000795	CC	synaptonemal complex	35	6	0.063286075602276	1
GO:0099086	CC	synaptonemal structure	35	6	0.063286075602276	1
GO:0060561	BP	apoptotic process involved in morphogenesis	26	6	0.063383832985459	1
GO:0090068	BP	positive regulation of cell cycle process	289	34	0.0634581092592901	1
GO:0051703	BP	intraspecies interaction between organisms	47	9	0.0636027709576285	1
GO:0035065	BP	regulation of histone acetylation	53	9	0.0636148871071718	1
GO:0039654	BP	fusion of virus membrane with host endosome membrane	1	1	0.0639474722372236	1
GO:0097655	MF	serpin family protein binding	1	1	0.0639474722372236	1
GO:1901844	BP	regulation of cell communication by electrical coupling involved in cardiac conduction	9	3	0.0639770249178366	1
GO:0000118	CC	histone deacetylase complex	72	12	0.0640105945897354	1
GO:0099025	CC	anchored component of postsynaptic membrane	5	2	0.0640496267448384	1
GO:0060401	BP	cytosolic calcium ion transport	172	23	0.0640571161524874	1
GO:0002030	BP	inhibitory G protein-coupled receptor phosphorylation	1	1	0.064059815935685	1
GO:0060182	MF	apelin receptor activity	1	1	0.064059815935685	1
GO:0060183	BP	apelin receptor signaling pathway	1	1	0.064059815935685	1
GO:1904323	BP	regulation of inhibitory G protein-coupled receptor phosphorylation	1	1	0.064059815935685	1
GO:1904325	BP	positive regulation of inhibitory G protein-coupled receptor phosphorylation	1	1	0.064059815935685	1
GO:0019855	MF	calcium channel inhibitor activity	11	3	0.0641395244514073	1
GO:0004367	MF	glycerol-3-phosphate dehydrogenase [NAD+] activity	1	1	0.064337592969201	1
GO:0047952	MF	glycerol-3-phosphate dehydrogenase [NAD(P)+] activity	1	1	0.064337592969201	1
GO:0070306	BP	lens fiber cell differentiation	35	7	0.0644665236116874	1
GO:0031102	BP	neuron projection regeneration	56	10	0.06448341819775	1
GO:0060739	BP	mesenchymal-epithelial cell signaling involved in prostate gland development	1	1	0.0644931577187311	1
GO:0051668	BP	localization within membrane	92	14	0.064523829435937	1
GO:0045821	BP	positive regulation of glycolytic process	23	5	0.0648098499324358	1
GO:0006386	BP	termination of RNA polymerase III transcription	1	1	0.0648631339207552	1
GO:0030228	MF	lipoprotein particle receptor activity	16	4	0.0649940423056097	1
GO:0044264	BP	cellular polysaccharide metabolic process	96	14	0.0651815904491344	1
GO:0007528	BP	neuromuscular junction development	48	9	0.0652614439217838	1
GO:0072676	BP	lymphocyte migration	108	13	0.0656168125965451	1
GO:0060236	BP	regulation of mitotic spindle organization	34	6	0.065695847217031	1
GO:0031826	MF	type 2A serotonin receptor binding	5	2	0.0659045498386482	1
GO:0036317	MF	tyrosyl-RNA phosphodiesterase activity	1	1	0.0659310903932982	1
GO:0070260	MF	5'-tyrosyl-DNA phosphodiesterase activity	1	1	0.0659310903932982	1
GO:0051008	MF	Hsp27 protein binding	1	1	0.0662113203991112	1
GO:0072393	BP	microtubule anchoring at microtubule organizing center	11	3	0.0662784328878982	1
GO:0048706	BP	embryonic skeletal system development	128	21	0.0666154649147279	1
GO:0007157	BP	heterophilic cell-cell adhesion via plasma membrane cell adhesion molecules	45	8	0.066701448290057	1
GO:0051959	MF	dynein light intermediate chain binding	27	6	0.066704866633361	1
GO:0048569	BP	post-embryonic animal organ development	15	4	0.0671793234801338	1
GO:0051661	BP	maintenance of centrosome location	6	2	0.0672764053700961	1
GO:0051660	BP	establishment of centrosome localization	9	3	0.0674595110977586	1
GO:0031103	BP	axon regeneration	49	9	0.0677218764281837	1
GO:1903047	BP	mitotic cell cycle process	870	90	0.0678199889589314	1
GO:0045141	BP	meiotic telomere clustering	11	3	0.0680552818880677	1
GO:0043297	BP	apical junction assembly	81	12	0.0681492999524558	1
GO:0008843	MF	endochitinase activity	1	1	0.0681659484600441	1
GO:0048739	BP	cardiac muscle fiber development	10	3	0.0682078283603414	1
GO:0006957	BP	complement activation	alternative pathway	15	3	0.0682092775044871	1
GO:0032010	CC	phagolysosome	5	2	0.0682453792167254	1
GO:2001251	BP	negative regulation of chromosome organization	139	18	0.0684976908590319	1
GO:0035174	MF	histone serine kinase activity	6	2	0.0685952854017249	1
GO:0046398	BP	UDP-glucuronate metabolic process	4	2	0.0686327237691622	1
GO:0120045	BP	stereocilium maintenance	1	1	0.0686642077631199	1
GO:0006654	BP	phosphatidic acid biosynthetic process	48	8	0.0687010331461373	1
GO:0070524	MF	11-beta-hydroxysteroid dehydrogenase (NADP+) activity	1	1	0.068706995595664	1
GO:0061395	BP	positive regulation of transcription from RNA polymerase II promoter in response to arsenic-containing substance	1	1	0.0688436931273506	1
GO:0036024	CC	protein C inhibitor-TMPRSS7 complex	1	1	0.0688799214134618	1
GO:0036025	CC	protein C inhibitor-TMPRSS11E complex	1	1	0.0688799214134618	1
GO:0036026	CC	protein C inhibitor-PLAT complex	1	1	0.0688799214134618	1
GO:0036027	CC	protein C inhibitor-PLAU complex	1	1	0.0688799214134618	1
GO:0036028	CC	protein C inhibitor-thrombin complex	1	1	0.0688799214134618	1
GO:0036029	CC	protein C inhibitor-KLK3 complex	1	1	0.0688799214134618	1
GO:0036030	CC	protein C inhibitor-plasma kallikrein complex	1	1	0.0688799214134618	1
GO:0097181	CC	protein C inhibitor-coagulation factor V complex	1	1	0.0688799214134618	1
GO:0097182	CC	protein C inhibitor-coagulation factor Xa complex	1	1	0.0688799214134618	1
GO:0097183	CC	protein C inhibitor-coagulation factor XI complex	1	1	0.0688799214134618	1
GO:0055117	BP	regulation of cardiac muscle contraction	78	12	0.0689287765550375	1
GO:0034389	BP	lipid droplet organization	26	5	0.0690115297801591	1
GO:0000805	CC	X chromosome	10	3	0.069056973224116	1
GO:0007093	BP	mitotic cell cycle checkpoint	165	21	0.0690765552739595	1
GO:0044773	BP	mitotic DNA damage checkpoint	100	14	0.0691011549349745	1
GO:0047186	MF	N-acetylneuraminate 7-O(or 9-O)-acetyltransferase activity	1	1	0.0692431215907093	1
GO:0035921	BP	desmosome disassembly	1	1	0.0692639774957695	1
GO:0071919	BP	G-quadruplex DNA formation	1	1	0.0693221613303918	1
GO:0031640	BP	killing of cells of other organism	60	7	0.069632525511804	1
GO:0051280	BP	negative regulation of release of sequestered calcium ion into cytosol	13	3	0.0699903281824718	1
GO:0047323	MF	[3-methyl-2-oxobutanoate dehydrogenase (acetyl-transferring)] kinase activity	1	1	0.0700293618136192	1
GO:0070694	MF	deoxyribonucleoside 5'-monophosphate N-glycosidase activity	1	1	0.0700509780604098	1
GO:0006270	BP	DNA replication initiation	36	6	0.0700781079941869	1
GO:0090486	MF	small RNA 2'-O-methyltransferase	1	1	0.0701026847004095	1
GO:0007146	BP	meiotic recombination nodule assembly	1	1	0.0702381703148369	1
GO:0042140	BP	late meiotic recombination nodule assembly	1	1	0.0702381703148369	1
GO:0099084	BP	postsynaptic specialization organization	32	7	0.0702472073324015	1
GO:0002076	BP	osteoblast development	19	5	0.0703240561572046	1
GO:1902751	BP	positive regulation of cell cycle G2/M phase transition	29	6	0.0704987332692351	1
GO:0070191	MF	methionine-R-sulfoxide reductase activity	1	1	0.0707204819164317	1
GO:0044298	CC	cell body membrane	31	6	0.0707441830754428	1
GO:0052696	BP	flavonoid glucuronidation	9	2	0.0707711531317105	1
GO:0036151	BP	phosphatidylcholine acyl-chain remodeling	29	5	0.0707868924386563	1
GO:0036157	CC	outer dynein arm	11	3	0.07090498594528	1
GO:0031420	MF	alkali metal ion binding	17	4	0.0709435751197306	1
GO:0061750	MF	acid sphingomyelin phosphodiesterase activity	1	1	0.0709701109536389	1
GO:0004506	MF	squalene monooxygenase activity	1	1	0.0709772830923555	1
GO:0036153	BP	triglyceride acyl-chain remodeling	1	1	0.0710695311206234	1
GO:0051264	MF	mono-olein transacylation activity	1	1	0.0710695311206234	1
GO:0051265	MF	diolein transacylation activity	1	1	0.0710695311206234	1
GO:0045828	BP	positive regulation of isoprenoid metabolic process	1	1	0.0712784990360626	1
GO:1900054	BP	positive regulation of retinoic acid biosynthetic process	1	1	0.0712784990360626	1
GO:0016051	BP	carbohydrate biosynthetic process	204	25	0.0712979947015094	1
GO:0030879	BP	mammary gland development	136	20	0.0713091774081354	1
GO:0006452	BP	translational frameshifting	1	1	0.0713652303526519	1
GO:0075523	BP	viral translational frameshifting	1	1	0.0713652303526519	1
GO:2001124	BP	regulation of translational frameshifting	1	1	0.0713652303526519	1
GO:2001125	BP	negative regulation of translational frameshifting	1	1	0.0713652303526519	1
GO:0005175	MF	CD27 receptor binding	1	1	0.0715016536605884	1
GO:0016153	MF	urocanate hydratase activity	1	1	0.0715937234907707	1
GO:0086072	BP	AV node cell-bundle of His cell adhesion involved in cell communication	1	1	0.0716558226645272	1
GO:0086082	MF	cell adhesive protein binding involved in AV node cell-bundle of His cell communication	1	1	0.0716558226645272	1
GO:0005815	CC	microtubule organizing center	752	79	0.0717213200241842	1
GO:0016572	BP	histone phosphorylation	39	7	0.0717679243127236	1
GO:0036497	BP	eIF2alpha dephosphorylation in response to endoplasmic reticulum stress	1	1	0.0717882381579146	1
GO:1903916	BP	regulation of endoplasmic reticulum stress-induced eIF2 alpha dephosphorylation	1	1	0.0717882381579146	1
GO:1903917	BP	positive regulation of endoplasmic reticulum stress-induced eIF2 alpha dephosphorylation	1	1	0.0717882381579146	1
GO:0009812	BP	flavonoid metabolic process	16	3	0.0717925466578198	1
GO:0051209	BP	release of sequestered calcium ion into cytosol	115	16	0.0718194675292404	1
GO:0044508	MF	glucagon-like peptide 1 receptor activity	1	1	0.0718497833161721	1
GO:0030533	MF	triplet codon-amino acid adaptor activity	1	1	0.0718629332076517	1
GO:0030431	BP	sleep	34	6	0.0722871877487995	1
GO:0018009	BP	N-terminal peptidyl-L-cysteine N-palmitoylation	1	1	0.0724191465170784	1
GO:1903434	BP	negative regulation of constitutive secretory pathway	1	1	0.0724665416516554	1
GO:0098687	CC	chromosomal region	332	36	0.0724783432796018	1
GO:0021885	BP	forebrain cell migration	55	10	0.0725528589043674	1
GO:0007522	BP	visceral muscle development	1	1	0.0727360519214729	1
GO:0044873	BP	lipoprotein localization to membrane	1	1	0.0727409597056885	1
GO:1990755	BP	mitotic spindle microtubule depolymerization	1	1	0.0729805469440578	1
GO:1990859	BP	cellular response to endothelin	1	1	0.0730201935036449	1
GO:0097114	BP	NMDA glutamate receptor clustering	4	2	0.0730572410013042	1
GO:0048878	BP	chemical homeostasis	1151	118	0.0732216183337219	1
GO:0046870	MF	cadmium ion binding	5	2	0.0733032012694079	1
GO:0035162	BP	embryonic hemopoiesis	22	5	0.0733333995405463	1
GO:0021754	BP	facial nucleus development	1	1	0.073432698798571	1
GO:0035878	BP	nail development	10	3	0.0735057148269336	1
GO:0030309	BP	poly-N-acetyllactosamine metabolic process	13	3	0.0735348037743908	1
GO:0036398	CC	TCR signalosome	1	1	0.0735595053494294	1
GO:0042555	CC	MCM complex	12	3	0.0735639535102859	1
GO:0000794	CC	condensed nuclear chromosome	92	12	0.0735663763715534	1
GO:0015094	MF	lead ion transmembrane transporter activity	1	1	0.0736416512705626	1
GO:0015099	MF	nickel cation transmembrane transporter activity	1	1	0.0736416512705626	1
GO:0015675	BP	nickel cation transport	1	1	0.0736416512705626	1
GO:0015692	BP	lead ion transport	1	1	0.0736416512705626	1
GO:0035444	BP	nickel cation transmembrane transport	1	1	0.0736416512705626	1
GO:0070826	CC	paraferritin complex	1	1	0.0736416512705626	1
GO:0070184	BP	mitochondrial tyrosyl-tRNA aminoacylation	1	1	0.0736641979779748	1
GO:0072545	MF	tyrosine binding	1	1	0.0736641979779748	1
GO:0047536	MF	2-aminoadipate transaminase activity	1	1	0.0736823407287168	1
GO:0019904	MF	protein domain specific binding	671	78	0.0737621770260563	1
GO:0071535	MF	RING-like zinc finger domain binding	4	2	0.0738444343673699	1
GO:0003166	BP	bundle of His development	4	2	0.0738769715681634	1
GO:1905572	BP	ganglioside GM1 transport to membrane	1	1	0.0739389861031731	1
GO:1905574	MF	ganglioside GM2 binding	1	1	0.0739389861031731	1
GO:1905575	MF	ganglioside GM3 binding	1	1	0.0739389861031731	1
GO:1905577	MF	ganglioside GP1c binding	1	1	0.0739389861031731	1
GO:0050803	BP	regulation of synapse structure or activity	225	31	0.0739398678241846	1
GO:0008347	BP	glial cell migration	52	9	0.0739422135685596	1
GO:0032791	MF	lead ion binding	1	1	0.073960981178275	1
GO:0000127	CC	transcription factor TFIIIC complex	6	2	0.0740327660797432	1
GO:0042791	BP	5S class rRNA transcription by RNA polymerase III	6	2	0.0740327660797432	1
GO:0015362	MF	high-affinity sodium:dicarboxylate symporter activity	1	1	0.07412870939805	1
GO:0000802	CC	transverse filament	1	1	0.0741879370604403	1
GO:0051878	BP	lateral element assembly	1	1	0.0741879370604403	1
GO:0048252	BP	lauric acid metabolic process	2	1	0.0742702214395101	1
GO:0043539	MF	protein serine/threonine kinase activator activity	36	6	0.0745192297186102	1
GO:0010872	BP	regulation of cholesterol esterification	14	3	0.0746995539276572	1
GO:0033013	BP	tetrapyrrole metabolic process	59	8	0.0748708532401058	1
GO:0030548	MF	acetylcholine receptor regulator activity	12	3	0.0750505109498171	1
GO:0099602	MF	neurotransmitter receptor regulator activity	12	3	0.0750505109498171	1
GO:0005198	MF	structural molecule activity	645	66	0.0751164421386058	1
GO:0030275	MF	LRR domain binding	17	4	0.0751993292234986	1
GO:0052798	MF	beta-galactoside alpha-2	3-sialyltransferase activity	1	1	0.0753052059313995	1
GO:0032133	CC	chromosome passenger complex	6	2	0.0755014841259044	1
GO:0060560	BP	developmental growth involved in morphogenesis	222	32	0.075532040037918	1
GO:0070060	BP	'de novo' actin filament nucleation	1	1	0.0756576095674095	1
GO:0051283	BP	negative regulation of sequestering of calcium ion	116	16	0.0757395453138326	1
GO:0033679	MF	3'-5' DNA/RNA helicase activity	1	1	0.0758775060439929	1
GO:0039695	BP	DNA-templated viral transcription	1	1	0.0758775060439929	1
GO:1904971	BP	regulation of viral translation	1	1	0.0758775060439929	1
GO:1904973	BP	positive regulation of viral translation	1	1	0.0758775060439929	1
GO:1905698	BP	positive regulation of polysome binding	1	1	0.0758775060439929	1
GO:0050890	BP	cognition	287	37	0.0759215301257361	1
GO:0099544	CC	perisynaptic space	5	2	0.0761878397622738	1
GO:0045913	BP	positive regulation of carbohydrate metabolic process	82	12	0.076425446245839	1
GO:0045787	BP	positive regulation of cell cycle	376	43	0.0765414916612928	1
GO:0060920	BP	cardiac pacemaker cell differentiation	5	2	0.0766489092231128	1
GO:0034117	BP	erythrocyte aggregation	1	1	0.0767161700484412	1
GO:0034118	BP	regulation of erythrocyte aggregation	1	1	0.0767161700484412	1
GO:0034120	BP	positive regulation of erythrocyte aggregation	1	1	0.0767161700484412	1
GO:0043073	CC	germ cell nucleus	19	4	0.0767557902557007	1
GO:0030366	MF	molybdopterin synthase activity	1	1	0.076791848434404	1
GO:0005219	MF	ryanodine-sensitive calcium-release channel activity	4	2	0.0768001779146646	1
GO:0070571	BP	negative regulation of neuron projection regeneration	15	4	0.076901729505311	1
GO:0048812	BP	neuron projection morphogenesis	633	82	0.0770687151761487	1
GO:0048813	BP	dendrite morphogenesis	133	21	0.0771244839289114	1
GO:1990841	MF	promoter-specific chromatin binding	56	9	0.0772343076472455	1
GO:0006050	BP	mannosamine metabolic process	1	1	0.0772767524835261	1
GO:0006051	BP	N-acetylmannosamine metabolic process	1	1	0.0772767524835261	1
GO:0045127	MF	N-acetylglucosamine kinase activity	1	1	0.0772767524835261	1
GO:0001501	BP	skeletal system development	499	62	0.0772843908999923	1
GO:0034637	BP	cellular carbohydrate biosynthetic process	84	12	0.0773036534891607	1
GO:0080163	BP	regulation of protein serine/threonine phosphatase activity	1	1	0.0774856841135981	1
GO:0004767	MF	sphingomyelin phosphodiesterase activity	6	2	0.0775099863908568	1
GO:0004747	MF	ribokinase activity	1	1	0.0776293895671651	1
GO:0070555	BP	response to interleukin-1	201	22	0.0780393099290666	1
GO:0097623	BP	potassium ion export across plasma membrane	17	4	0.078199497920473	1
GO:0031674	CC	I band	134	19	0.0783309141033474	1
GO:0098797	CC	plasma membrane protein complex	549	65	0.0784072561454275	1
GO:0098900	BP	regulation of action potential	54	9	0.0787862768631087	1
GO:0060380	BP	regulation of single-stranded telomeric DNA binding	1	1	0.078917251066705	1
GO:0060381	BP	positive regulation of single-stranded telomeric DNA binding	1	1	0.078917251066705	1
GO:0006383	BP	transcription by RNA polymerase III	46	7	0.0791967547045267	1
GO:2000487	BP	positive regulation of glutamine transport	1	1	0.0792228670021634	1
GO:0008306	BP	associative learning	74	12	0.0792440103688003	1
GO:0036499	BP	PERK-mediated unfolded protein response	21	4	0.0794426919341552	1
GO:0140467	BP	integrated stress response signaling	21	4	0.0794426919341552	1
GO:0007632	BP	visual behavior	51	9	0.0794729038427086	1
GO:1904398	BP	positive regulation of neuromuscular junction development	5	2	0.0794836942047436	1
GO:2000587	BP	negative regulation of platelet-derived growth factor receptor-beta signaling pathway	4	2	0.0795604366722161	1
GO:0034350	BP	regulation of glial cell apoptotic process	9	3	0.0797007700336712	1
GO:0000727	BP	double-strand break repair via break-induced replication	12	3	0.0797726889145156	1
GO:0004458	MF	D-lactate dehydrogenase (cytochrome) activity	1	1	0.0797892839301763	1
GO:0008720	MF	D-lactate dehydrogenase activity	1	1	0.0797892839301763	1
GO:0016898	MF	oxidoreductase activity	acting on the CH-OH group of donors	cytochrome as acceptor	1	1	0.0797892839301763	1
GO:1903457	BP	lactate catabolic process	1	1	0.0797892839301763	1
GO:0000334	MF	3-hydroxyanthranilate 3	4-dioxygenase activity	1	1	0.0799873647865711	1
GO:0070603	CC	SWI/SNF superfamily-type complex	72	11	0.0802355358277019	1
GO:0034397	BP	telomere localization	12	3	0.0802483230496501	1
GO:0090220	BP	chromosome localization to nuclear envelope involved in homologous chromosome segregation	12	3	0.0802483230496501	1
GO:0009645	BP	response to low light intensity stimulus	1	1	0.0804701323296272	1
GO:0046690	BP	response to tellurium ion	1	1	0.0804701323296272	1
GO:0071517	BP	maintenance of imprinting at mating-type locus	1	1	0.0805909829681554	1
GO:0016363	CC	nuclear matrix	103	15	0.0807017000525017	1
GO:0005272	MF	sodium channel activity	43	8	0.0811351327074998	1
GO:0005520	MF	insulin-like growth factor binding	29	6	0.0811407177202362	1
GO:0052381	MF	tRNA dimethylallyltransferase activity	1	1	0.081173287472104	1
GO:1904861	BP	excitatory synapse assembly	26	6	0.0813439575721838	1
GO:0052697	BP	xenobiotic glucuronidation	10	2	0.0813510675861799	1
GO:0036494	BP	positive regulation of translation initiation in response to endoplasmic reticulum stress	1	1	0.0813916956157481	1
GO:0050927	BP	positive regulation of positive chemotaxis	24	5	0.0814740712331609	1
GO:0003010	BP	voluntary skeletal muscle contraction	5	2	0.0818037415048666	1
GO:0014721	BP	twitch skeletal muscle contraction	5	2	0.0818037415048666	1
GO:1904828	BP	positive regulation of hydrogen sulfide biosynthetic process	1	1	0.0818184781337464	1
GO:0004801	MF	sedoheptulose-7-phosphate:D-glyceraldehyde-3-phosphate glyceronetransferase activity	1	1	0.0818589690288277	1
GO:1900825	BP	regulation of membrane depolarization during cardiac muscle cell action potential	6	2	0.0818820127408997	1
GO:0033268	CC	node of Ranvier	15	4	0.0822569851123775	1
GO:0051282	BP	regulation of sequestering of calcium ion	118	16	0.0823441142799893	1
GO:1900044	BP	regulation of protein K63-linked ubiquitination	13	3	0.0823641025392988	1
GO:0047273	MF	galactosylgalactosylglucosylceramide beta-D-acetylgalactosaminyltransferase activity	1	1	0.0824211625581834	1
GO:0061577	BP	calcium ion transmembrane transport via high voltage-gated calcium channel	17	4	0.0824595409056992	1
GO:0006873	BP	cellular ion homeostasis	636	67	0.0829504670107019	1
GO:0033613	MF	activating transcription factor binding	76	13	0.0831652494522155	1
GO:0071359	BP	cellular response to dsRNA	20	4	0.0832211937281663	1
GO:0005217	MF	intracellular ligand-gated ion channel activity	28	6	0.0833379823773465	1
GO:0006805	BP	xenobiotic metabolic process	114	13	0.0835637899775104	1
GO:0043247	BP	telomere maintenance in response to DNA damage	13	3	0.0836098979226888	1
GO:0046380	BP	N-acetylneuraminate biosynthetic process	1	1	0.0837083487148941	1
GO:0050124	MF	N-acylneuraminate-9-phosphatase activity	1	1	0.0837083487148941	1
GO:0098662	BP	inorganic cation transmembrane transport	729	80	0.0837649931049628	1
GO:0035375	MF	zymogen binding	1	1	0.0839069180544542	1
GO:0014801	CC	longitudinal sarcoplasmic reticulum	1	1	0.0839553792910596	1
GO:0004334	MF	fumarylacetoacetase activity	1	1	0.084003902358378	1
GO:1901999	BP	homogentisate metabolic process	1	1	0.084003902358378	1
GO:1902000	BP	homogentisate catabolic process	1	1	0.084003902358378	1
GO:0034770	BP	histone H4-K20 methylation	10	3	0.0841095577670355	1
GO:0061374	BP	mammillothalamic axonal tract development	1	1	0.0843942367156737	1
GO:0061381	BP	cell migration in diencephalon	1	1	0.0843942367156737	1
GO:0046473	BP	phosphatidic acid metabolic process	50	8	0.0848053992767427	1
GO:0098737	BP	protein insertion into plasma membrane	1	1	0.084843418972423	1
GO:0120003	CC	hinge region between urothelial plaques of apical plasma membrane	1	1	0.084843418972423	1
GO:0031686	MF	A1 adenosine receptor binding	1	1	0.0849427041354493	1
GO:0042537	BP	benzene-containing compound metabolic process	25	4	0.0850997668248725	1
GO:0000146	MF	microfilament motor activity	29	6	0.0851596224123139	1
GO:0018142	BP	protein-DNA covalent cross-linking	1	1	0.0854208086364245	1
GO:0018143	BP	nucleic acid-protein covalent cross-linking	1	1	0.0854208086364245	1
GO:0071825	BP	protein-lipid complex subunit organization	55	8	0.0858517986662024	1
GO:0006349	BP	regulation of gene expression by genetic imprinting	17	4	0.0859178407542024	1
GO:0046959	BP	habituation	4	2	0.0859584387589621	1
GO:0016151	MF	nickel cation binding	1	1	0.0860146878215547	1
GO:0032411	BP	positive regulation of transporter activity	108	15	0.0862020420148811	1
GO:0000306	CC	extrinsic component of vacuolar membrane	4	2	0.0863580832869955	1
GO:0047800	MF	cysteamine dioxygenase activity	1	1	0.0863776846277569	1
GO:0042562	MF	hormone binding	81	12	0.086415180869967	1
GO:0036004	MF	GAF domain binding	1	1	0.0864708031904767	1
GO:0032783	CC	super elongation complex	5	2	0.0865514157096917	1
GO:0010564	BP	regulation of cell cycle process	750	77	0.0865788954453549	1
GO:0016049	BP	cell growth	464	56	0.0867610525630259	1
GO:0070562	BP	regulation of vitamin D receptor signaling pathway	6	2	0.086818243853639	1
GO:0008391	MF	arachidonic acid monooxygenase activity	18	3	0.08698165835194	1
GO:0099171	BP	presynaptic modulation of chemical synaptic transmission	15	4	0.0870462447009458	1
GO:0032474	BP	otolith morphogenesis	4	2	0.087064963013719	1
GO:0098813	BP	nuclear chromosome segregation	257	28	0.0870795802829901	1
GO:0120039	BP	plasma membrane bounded cell projection morphogenesis	647	83	0.0873458214790222	1
GO:0042277	MF	peptide binding	283	33	0.0874995769295535	1
GO:0051308	BP	male meiosis chromosome separation	1	1	0.087660135630853	1
GO:0042391	BP	regulation of membrane potential	426	51	0.087719858435867	1
GO:0036315	BP	cellular response to sterol	26	5	0.0878369290730106	1
GO:0098877	BP	neurotransmitter receptor transport to plasma membrane	16	4	0.0880564464637662	1
GO:0098969	BP	neurotransmitter receptor transport to postsynaptic membrane	16	4	0.0880564464637662	1
GO:0003844	MF	1	4-alpha-glucan branching enzyme activity	1	1	0.0883104693110696	1
GO:0102752	MF	1	4-alpha-glucan branching enzyme activity (using a glucosylated glycogenin as primer for glycogen synthesis)	1	1	0.0883104693110696	1
GO:0060296	BP	regulation of cilium beat frequency involved in ciliary motility	7	2	0.0886653073003316	1
GO:0030246	MF	carbohydrate binding	251	26	0.088693346532931	1
GO:0006984	BP	ER-nucleus signaling pathway	50	8	0.0886958499665917	1
GO:0086010	BP	membrane depolarization during action potential	37	7	0.0887026613052873	1
GO:0051168	BP	nuclear export	193	22	0.0887610404071434	1
GO:0005267	MF	potassium channel activity	115	17	0.0887865369280749	1
GO:0098837	CC	postsynaptic recycling endosome	7	2	0.0889549872580587	1
GO:1903568	BP	negative regulation of protein localization to ciliary membrane	1	1	0.089085587112779	1
GO:0042363	BP	fat-soluble vitamin catabolic process	12	3	0.0891345292189644	1
GO:0072755	BP	cellular response to benomyl	1	1	0.0892406729109878	1
GO:1901561	BP	response to benomyl	1	1	0.0892406729109878	1
GO:0099072	BP	regulation of postsynaptic membrane neurotransmitter receptor levels	62	10	0.0893190221559402	1
GO:0071494	BP	cellular response to UV-C	7	2	0.0897787346825277	1
GO:0003979	MF	UDP-glucose 6-dehydrogenase activity	1	1	0.0900091373826305	1
GO:0004064	MF	arylesterase activity	6	2	0.0904339994619973	1
GO:0050926	BP	regulation of positive chemotaxis	25	5	0.0904610457703956	1
GO:0010968	BP	regulation of microtubule nucleation	6	2	0.0906238673008243	1
GO:0048167	BP	regulation of synaptic plasticity	186	26	0.0910323926089044	1
GO:0010832	BP	negative regulation of myotube differentiation	18	4	0.0910785599862012	1
GO:0098771	BP	inorganic ion homeostasis	705	74	0.0910788423171359	1
GO:0010856	MF	adenylate cyclase activator activity	5	2	0.0911411252741253	1
GO:0060468	BP	prevention of polyspermy	2	1	0.0912638768470197	1
GO:0072345	MF	NAADP-sensitive calcium-release channel activity	5	2	0.0913139388975213	1
GO:0043568	BP	positive regulation of insulin-like growth factor receptor signaling pathway	12	3	0.0914009314244483	1
GO:0015015	BP	heparan sulfate proteoglycan biosynthetic process	enzymatic modification	5	2	0.0915422922375838	1
GO:1990266	BP	neutrophil migration	115	13	0.0916430669833563	1
GO:0015220	MF	choline transmembrane transporter activity	5	2	0.0916441654639333	1
GO:0008474	MF	palmitoyl-(protein) hydrolase activity	13	3	0.0917390812749785	1
GO:0098599	MF	palmitoyl hydrolase activity	13	3	0.0917390812749785	1
GO:0098734	BP	macromolecule depalmitoylation	13	3	0.0917390812749785	1
GO:0098844	CC	postsynaptic endocytic zone membrane	5	2	0.0919285278738459	1
GO:0042430	BP	indole-containing compound metabolic process	22	4	0.0920687823111128	1
GO:0001958	BP	endochondral ossification	28	6	0.0920914598654227	1
GO:0036075	BP	replacement ossification	28	6	0.0920914598654227	1
GO:0009650	BP	UV protection	13	3	0.0923216634108387	1
GO:1904585	BP	response to putrescine	1	1	0.0925470150877301	1
GO:1904586	BP	cellular response to putrescine	1	1	0.0925470150877301	1
GO:1990828	BP	hepatocyte dedifferentiation	1	1	0.0925470150877301	1
GO:0022412	BP	cellular process involved in reproduction in multicellular organism	356	37	0.0930966471279491	1
GO:0051414	BP	response to cortisol	5	2	0.0931313288566755	1
GO:0010385	MF	double-stranded methylated DNA binding	5	2	0.0932666615441951	1
GO:1901032	BP	negative regulation of response to reactive oxygen species	22	4	0.0934450542635724	1
GO:1903206	BP	negative regulation of hydrogen peroxide-induced cell death	22	4	0.0934450542635724	1
GO:0048024	BP	regulation of mRNA splicing	via spliceosome	103	14	0.0934494508630018	1
GO:0016234	CC	inclusion body	76	11	0.0935220215967143	1
GO:0048858	BP	cell projection morphogenesis	651	83	0.0937893682545435	1
GO:0071277	BP	cellular response to calcium ion	80	12	0.0938599863622751	1
GO:0075519	BP	microtubule-dependent intracellular transport of viral material	1	1	0.0939878708865458	1
GO:0075521	BP	microtubule-dependent intracellular transport of viral material towards nucleus	1	1	0.0939878708865458	1
GO:0075606	BP	transport of viral material towards nucleus	1	1	0.0939878708865458	1
GO:0004620	MF	phospholipase activity	105	13	0.0941140959594501	1
GO:0043843	MF	ADP-specific glucokinase activity	1	1	0.0944332570779577	1
GO:0051491	BP	positive regulation of filopodium assembly	28	6	0.0947585370498412	1
GO:0099601	BP	regulation of neurotransmitter receptor activity	74	12	0.0948548486271185	1
GO:0031113	BP	regulation of microtubule polymerization	49	8	0.0948589018108046	1
GO:0072714	BP	response to selenite ion	1	1	0.0949723011202666	1
GO:0072715	BP	cellular response to selenite ion	1	1	0.0949723011202666	1
GO:1904570	BP	negative regulation of selenocysteine incorporation	1	1	0.0949723011202666	1
GO:1904572	BP	negative regulation of mRNA binding	1	1	0.0949723011202666	1
GO:1904573	BP	regulation of selenocysteine insertion sequence binding	1	1	0.0949723011202666	1
GO:1904574	BP	negative regulation of selenocysteine insertion sequence binding	1	1	0.0949723011202666	1
GO:1905215	BP	negative regulation of RNA binding	1	1	0.0949723011202666	1
GO:1903224	BP	regulation of endodermal cell differentiation	5	2	0.0952358468647063	1
GO:0010457	BP	centriole-centriole cohesion	13	3	0.0952737048076689	1
GO:0000421	CC	autophagosome membrane	36	6	0.0952837471315318	1
GO:0010524	BP	positive regulation of calcium ion transport into cytosol	54	8	0.0953439268688931	1
GO:0005868	CC	cytoplasmic dynein complex	20	4	0.095397366398422	1
GO:0070491	MF	repressing transcription factor binding	71	11	0.0955981710581192	1
GO:0071514	BP	genetic imprinting	26	5	0.0956795306227566	1
GO:0051208	BP	sequestering of calcium ion	121	16	0.0957628596861998	1
GO:0055062	BP	phosphate ion homeostasis	12	3	0.0957731462350752	1
GO:0072505	BP	divalent inorganic anion homeostasis	12	3	0.0957731462350752	1
GO:0072506	BP	trivalent inorganic anion homeostasis	12	3	0.0957731462350752	1
GO:0003164	BP	His-Purkinje system development	5	2	0.0958548590704419	1
GO:0008331	MF	high voltage-gated calcium channel activity	9	3	0.0961026290279591	1
GO:0070208	BP	protein heterotrimerization	1	1	0.0961672438286974	1
GO:0009256	BP	10-formyltetrahydrofolate metabolic process	5	2	0.0961790711563453	1
GO:0042797	BP	tRNA transcription by RNA polymerase III	7	2	0.0963116714283954	1
GO:0050807	BP	regulation of synapse organization	214	29	0.0963823435600885	1
GO:0032269	BP	negative regulation of cellular protein metabolic process	1079	107	0.0964875001059828	1
GO:0048732	BP	gland development	429	52	0.0968215475306205	1
GO:0070309	BP	lens fiber cell morphogenesis	6	2	0.0968727541644024	1
GO:0046332	MF	SMAD binding	74	12	0.0969077158498486	1
GO:0004671	MF	protein C-terminal S-isoprenylcysteine carboxyl O-methyltransferase activity	1	1	0.0969436842904202	1
GO:0072039	BP	regulation of mesenchymal cell apoptotic process involved in nephron morphogenesis	4	2	0.0970345964643176	1
GO:0072040	BP	negative regulation of mesenchymal cell apoptotic process involved in nephron morphogenesis	4	2	0.0970345964643176	1
GO:1901145	BP	mesenchymal cell apoptotic process involved in nephron morphogenesis	4	2	0.0970345964643176	1
GO:2001245	BP	regulation of phosphatidylcholine biosynthetic process	5	2	0.0973528127106615	1
GO:0061986	BP	negative regulation of transcription by glucose	1	1	0.0973923168633365	1
GO:0061987	BP	negative regulation of transcription from RNA polymerase II promoter by glucose	1	1	0.0973923168633365	1
GO:2000970	BP	regulation of detection of glucose	1	1	0.0973923168633365	1
GO:2000971	BP	negative regulation of detection of glucose	1	1	0.0973923168633365	1
GO:0042162	MF	telomeric DNA binding	36	6	0.0973969463857391	1
GO:0031626	MF	beta-endorphin binding	1	1	0.0975195467364601	1
GO:0048667	BP	cell morphogenesis involved in neuron differentiation	572	74	0.0975635907322609	1
GO:0007017	BP	microtubule-based process	811	84	0.0975913811466519	1
GO:0031859	MF	platelet activating factor receptor binding	1	1	0.0977443818766485	1
GO:0006706	BP	steroid catabolic process	26	4	0.0977844302683857	1
GO:0000812	CC	Swr1 complex	12	3	0.0977926136197137	1
GO:0031572	BP	G2 DNA damage checkpoint	34	6	0.0982604034004931	1
GO:0000139	CC	Golgi membrane	713	76	0.098442006026059	1
GO:0003025	BP	regulation of systemic arterial blood pressure by baroreceptor feedback	4	2	0.0984706435417632	1
GO:0030003	BP	cellular cation homeostasis	623	65	0.0985694762414832	1
GO:0003682	MF	chromatin binding	549	62	0.0986028868873512	1
GO:0071347	BP	cellular response to interleukin-1	176	19	0.0987197312145443	1
GO:0009410	BP	response to xenobiotic stimulus	126	14	0.0987565558023841	1
GO:0070374	BP	positive regulation of ERK1 and ERK2 cascade	207	24	0.0989817074841285	1
GO:0061564	BP	axon development	502	65	0.0991688564403888	1
GO:0001508	BP	action potential	132	18	0.0991760439261691	1
GO:0010948	BP	negative regulation of cell cycle process	341	37	0.0995143547542352	1
GO:0001517	MF	N-acetylglucosamine 6-O-sulfotransferase activity	6	2	0.0995161070011436	1
GO:0015272	MF	ATP-activated inward rectifier potassium channel activity	6	2	0.0996445013485717	1
GO:1903421	BP	regulation of synaptic vesicle recycling	24	5	0.0996548433001387	1
GO:0070535	BP	histone H2A K63-linked ubiquitination	6	2	0.0998627483328493	1
GO:0030851	BP	granulocyte differentiation	32	6	0.0999823053355579	1
GO:0022604	BP	regulation of cell morphogenesis	472	59	0.100016480195314	1
GO:0007008	BP	outer mitochondrial membrane organization	7	2	0.10023051405079	1
GO:0036314	BP	response to sterol	35	6	0.100385459575953	1
GO:0031953	BP	negative regulation of protein autophosphorylation	13	3	0.100414938573418	1
GO:0038095	BP	Fc-epsilon receptor signaling pathway	107	14	0.100523882548308	1
GO:0045725	BP	positive regulation of glycogen biosynthetic process	16	4	0.100550767482067	1
GO:0005858	CC	axonemal dynein complex	20	4	0.100555930570293	1
GO:0019835	BP	cytolysis	29	4	0.100579289406545	1
GO:0019725	BP	cellular homeostasis	917	94	0.100580461973555	1
GO:0086065	BP	cell communication involved in cardiac conduction	54	9	0.100637665787464	1
GO:1903540	BP	establishment of protein localization to postsynaptic membrane	17	4	0.100725185976893	1
GO:0002175	BP	protein localization to paranode region of axon	5	2	0.10073895814477	1
GO:0098655	BP	cation transmembrane transport	832	90	0.101037140138959	1
GO:0008792	MF	arginine decarboxylase activity	1	1	0.101216657574549	1
GO:0098629	BP	trans-Golgi network membrane organization	1	1	0.101216657574549	1
GO:0009698	BP	phenylpropanoid metabolic process	7	2	0.101253563366291	1
GO:0009804	BP	coumarin metabolic process	7	2	0.101253563366291	1
GO:0005581	CC	collagen trimer	84	12	0.101424966049487	1
GO:0001661	BP	conditioned taste aversion	5	2	0.101446117711874	1
GO:1905349	BP	ciliary transition zone assembly	1	1	0.101818518408557	1
GO:0044774	BP	mitotic DNA integrity checkpoint	107	14	0.101898367162104	1
GO:0090224	BP	regulation of spindle organization	38	6	0.10207270397429	1
GO:0006942	BP	regulation of striated muscle contraction	92	13	0.102079375140298	1
GO:0072425	BP	signal transduction involved in G2 DNA damage checkpoint	13	3	0.102121419188666	1
GO:0007549	BP	dosage compensation	17	4	0.102177245349832	1
GO:0016887	MF	ATPase activity	410	45	0.102894580125801	1
GO:1901303	BP	negative regulation of cargo loading into COPII-coated vesicle	1	1	0.103059598301288	1
GO:0043696	BP	dedifferentiation	11	3	0.103308991933417	1
GO:0043697	BP	cell dedifferentiation	11	3	0.103308991933417	1
GO:0098810	BP	neurotransmitter reuptake	31	6	0.103313750114063	1
GO:0007059	BP	chromosome segregation	313	33	0.103392864462331	1
GO:0032401	BP	establishment of melanosome localization	21	4	0.103478535265759	1
GO:0032402	BP	melanosome transport	21	4	0.103478535265759	1
GO:0050930	BP	induction of positive chemotaxis	13	3	0.103588643678954	1
GO:1904949	CC	ATPase complex	76	11	0.103609640475545	1
GO:0032415	BP	regulation of sodium:proton antiporter activity	6	2	0.103717809717951	1
GO:0034330	BP	cell junction organization	671	81	0.103739402037777	1
GO:0002380	BP	immunoglobulin secretion involved in immune response	1	1	0.10386209848531	1
GO:0099637	BP	neurotransmitter receptor transport	46	8	0.10427171773538	1
GO:0043560	MF	insulin receptor substrate binding	10	3	0.104330288804418	1
GO:0019838	MF	growth factor binding	133	19	0.104475395372695	1
GO:0035234	BP	ectopic germ cell programmed cell death	7	2	0.104478424432536	1
GO:0006997	BP	nucleus organization	131	16	0.104483817713706	1
GO:0000904	BP	cell morphogenesis involved in differentiation	714	89	0.104592860342734	1
GO:0036152	BP	phosphatidylethanolamine acyl-chain remodeling	26	4	0.104604994617296	1
GO:1905832	BP	positive regulation of spindle assembly	5	2	0.104684745412334	1
GO:0007610	BP	behavior	583	68	0.104686407022943	1
GO:0005954	CC	calcium- and calmodulin-dependent protein kinase complex	5	2	0.105081968104048	1
GO:0098902	BP	regulation of membrane depolarization during action potential	7	2	0.105179833832729	1
GO:1904995	BP	negative regulation of leukocyte adhesion to vascular endothelial cell	10	2	0.105299253884738	1
GO:0072385	BP	minus-end-directed organelle transport along microtubule	5	2	0.105362694981087	1
GO:0030574	BP	collagen catabolic process	46	7	0.105384246825923	1
GO:2000502	BP	negative regulation of natural killer cell chemotaxis	2	1	0.10544954299894	1
GO:0030521	BP	androgen receptor signaling pathway	40	7	0.105588029197942	1
GO:0045794	BP	negative regulation of cell volume	5	2	0.105723502304424	1
GO:0140262	MF	mRNA cap binding complex binding	1	1	0.105757306174855	1
GO:0060133	BP	somatotropin secreting cell development	2	1	0.105817472482756	1
GO:0030016	CC	myofibril	219	27	0.105838613261854	1
GO:0043484	BP	regulation of RNA splicing	141	18	0.105850950203307	1
GO:0030550	MF	acetylcholine receptor inhibitor activity	6	2	0.105924905121634	1
GO:0006875	BP	cellular metal ion homeostasis	550	58	0.106436864879724	1
GO:0065008	BP	regulation of biological quality	3874	379	0.106699118178316	1
GO:0006022	BP	aminoglycan metabolic process	164	21	0.106706250001671	1
GO:2000311	BP	regulation of AMPA receptor activity	23	5	0.106749392374176	1
GO:1904328	BP	regulation of myofibroblast contraction	1	1	0.10691314398226	1
GO:1990764	BP	myofibroblast contraction	1	1	0.10691314398226	1
GO:0034773	BP	histone H4-K20 trimethylation	6	2	0.107134208606358	1
GO:0021615	BP	glossopharyngeal nerve morphogenesis	4	2	0.107400495618112	1
GO:1901983	BP	regulation of protein acetylation	70	10	0.107418429710248	1
GO:0048023	BP	positive regulation of melanin biosynthetic process	6	2	0.107547563289586	1
GO:1900378	BP	positive regulation of secondary metabolite biosynthetic process	6	2	0.107547563289586	1
GO:0021545	BP	cranial nerve development	50	9	0.107702342919572	1
GO:0031616	CC	spindle pole centrosome	14	3	0.107772588603715	1
GO:0043190	CC	ATP-binding cassette (ABC) transporter complex	6	2	0.10779568109292	1
GO:1902473	BP	regulation of protein localization to synapse	24	5	0.107821844450796	1
GO:0030955	MF	potassium ion binding	12	3	0.107876943621387	1
GO:1900150	BP	regulation of defense response to fungus	2	1	0.107968881558272	1
GO:1905323	BP	telomerase holoenzyme complex assembly	6	2	0.108138373797764	1
GO:0097718	MF	disordered domain specific binding	34	6	0.108437820164031	1
GO:0050686	BP	negative regulation of mRNA processing	28	5	0.108640856193503	1
GO:0006685	BP	sphingomyelin catabolic process	7	2	0.108786608896414	1
GO:0015012	BP	heparan sulfate proteoglycan biosynthetic process	25	5	0.108825603595251	1
GO:0007275	BP	multicellular organism development	5295	515	0.108859364238034	1
GO:0007006	BP	mitochondrial membrane organization	134	16	0.108892957592869	1
GO:0010259	BP	multicellular organism aging	35	6	0.108928492167654	1
GO:0060735	BP	regulation of eIF2 alpha phosphorylation by dsRNA	1	1	0.108965434249231	1
GO:1902629	BP	regulation of mRNA stability involved in cellular response to UV	1	1	0.108965434249231	1
GO:0004822	MF	isoleucine-tRNA ligase activity	2	1	0.109040175764149	1
GO:0006428	BP	isoleucyl-tRNA aminoacylation	2	1	0.109040175764149	1
GO:0061783	MF	peptidoglycan muralytic activity	10	2	0.109103599912336	1
GO:0042749	BP	regulation of circadian sleep/wake cycle	22	4	0.109112010197691	1
GO:0030426	CC	growth cone	172	24	0.109534053765161	1
GO:0021604	BP	cranial nerve structural organization	10	3	0.109734570055744	1
GO:0016595	MF	glutamate binding	10	3	0.109780345759561	1
GO:0007611	BP	learning or memory	248	32	0.109798593306369	1
GO:0009395	BP	phospholipid catabolic process	48	7	0.109822814163373	1
GO:0000280	BP	nuclear division	414	43	0.109927788239574	1
GO:0051284	BP	positive regulation of sequestering of calcium ion	15	3	0.110314852720237	1
GO:0005328	MF	neurotransmitter:sodium symporter activity	1	1	0.110330433082868	1
GO:0071206	BP	establishment of protein localization to juxtaparanode region of axon	1	1	0.110375632431679	1
GO:0000775	CC	chromosome	centromeric region	183	21	0.110395402992727	1
GO:0007100	BP	mitotic centrosome separation	14	3	0.110599671451984	1
GO:1900052	BP	regulation of retinoic acid biosynthetic process	2	1	0.110794619126381	1
GO:0045523	MF	interleukin-27 receptor binding	2	1	0.110992472400609	1
GO:0021799	BP	cerebral cortex radially oriented cell migration	30	6	0.111009126299604	1
GO:0098732	BP	macromolecule deacylation	102	14	0.111013556321763	1
GO:2000427	BP	positive regulation of apoptotic cell clearance	8	2	0.111116220695691	1
GO:0090265	BP	positive regulation of immune complex clearance by monocytes and macrophages	2	1	0.111276910076554	1
GO:0046920	MF	alpha-(1->3)-fucosyltransferase activity	8	2	0.111663553434138	1
GO:0101020	MF	estrogen 16-alpha-hydroxylase activity	8	2	0.111743215488745	1
GO:0097435	BP	supramolecular fiber organization	684	77	0.111750732260106	1
GO:0014888	BP	striated muscle adaptation	55	8	0.111763886483722	1
GO:0061863	MF	microtubule plus end polymerase	1	1	0.111962906662079	1
GO:0000414	BP	regulation of histone H3-K36 methylation	6	2	0.112347851288565	1
GO:0007623	BP	circadian rhythm	211	26	0.112384173666519	1
GO:0040001	BP	establishment of mitotic spindle localization	35	6	0.112405086120224	1
GO:0003168	BP	Purkinje myocyte differentiation	1	1	0.112523843087821	1
GO:0060927	BP	cardiac pacemaker cell fate commitment	1	1	0.112523843087821	1
GO:0060929	BP	atrioventricular node cell fate commitment	1	1	0.112523843087821	1
GO:2000251	BP	positive regulation of actin cytoskeleton reorganization	19	4	0.112666514995728	1
GO:0000803	CC	sex chromosome	29	5	0.112869879269115	1
GO:0008093	MF	cytoskeletal anchor activity	22	5	0.112925486995923	1
GO:0016679	MF	oxidoreductase activity	acting on diphenols and related substances as donors	8	2	0.112986966603526	1
GO:0000289	BP	nuclear-transcribed mRNA poly(A) tail shortening	36	6	0.113452792248007	1
GO:0070875	BP	positive regulation of glycogen metabolic process	17	4	0.113477619309858	1
GO:0045142	MF	triplex DNA binding	2	1	0.113602439939155	1
GO:0016594	MF	glycine binding	12	3	0.113769585934497	1
GO:1905394	MF	retromer complex binding	6	2	0.114206188564347	1
GO:0071629	BP	cytoplasm protein quality control by the ubiquitin-proteasome system	1	1	0.114510792422003	1
GO:0140455	BP	cytoplasm protein quality control	1	1	0.114510792422003	1
GO:0045956	BP	positive regulation of calcium ion-dependent exocytosis	18	4	0.114537654289366	1
GO:0045930	BP	negative regulation of mitotic cell cycle	332	36	0.114728992649125	1
GO:0005092	MF	GDP-dissociation inhibitor activity	14	3	0.1148158138486	1
GO:0004794	MF	L-threonine ammonia-lyase activity	2	1	0.114892456101334	1
GO:0006816	BP	calcium ion transport	408	46	0.115109883045575	1
GO:0007049	BP	cell cycle	1786	173	0.1151943151767	1
GO:0005952	CC	cAMP-dependent protein kinase complex	6	2	0.115218496381901	1
GO:0051495	BP	positive regulation of cytoskeleton organization	224	27	0.11556978906979	1
GO:0044341	BP	sodium-dependent phosphate transport	7	2	0.115636441423012	1
GO:0044224	CC	juxtaparanode region of axon	10	3	0.115655660121072	1
GO:1904528	BP	positive regulation of microtubule binding	6	2	0.115770839273706	1
GO:0016925	BP	protein sumoylation	77	10	0.115803926138903	1
GO:0071466	BP	cellular response to xenobiotic stimulus	119	13	0.116214462942286	1
GO:0072542	MF	protein phosphatase activator activity	13	3	0.116417000409671	1
GO:0010873	BP	positive regulation of cholesterol esterification	9	2	0.116514161443625	1
GO:0042754	BP	negative regulation of circadian rhythm	13	3	0.116697278522105	1
GO:0010938	BP	cytoplasmic microtubule depolymerization	1	1	0.116716912031645	1
GO:0060404	BP	axonemal microtubule depolymerization	1	1	0.116716912031645	1
GO:0061523	BP	cilium disassembly	1	1	0.116716912031645	1
GO:0070462	BP	plus-end specific microtubule depolymerization	1	1	0.116716912031645	1
GO:0055080	BP	cation homeostasis	695	72	0.116908298945959	1
GO:2001015	BP	negative regulation of skeletal muscle cell differentiation	6	2	0.117041878502356	1
GO:0003828	MF	alpha-N-acetylneuraminate alpha-2	8-sialyltransferase activity	6	2	0.117077707730799	1
GO:0004133	MF	glycogen debranching enzyme activity	1	1	0.117122940109706	1
GO:0004134	MF	4-alpha-glucanotransferase activity	1	1	0.117122940109706	1
GO:0004135	MF	amylo-alpha-1	6-glucosidase activity	1	1	0.117122940109706	1
GO:0043033	CC	isoamylase complex	1	1	0.117122940109706	1
GO:0102500	MF	beta-maltose 4-alpha-glucanotransferase activity	1	1	0.117122940109706	1
GO:0006614	BP	SRP-dependent cotranslational protein targeting to membrane	90	10	0.117182550892715	1
GO:1990226	MF	histone methyltransferase binding	7	2	0.117196768087878	1
GO:1901160	BP	primary amino compound metabolic process	13	3	0.117395537638821	1
GO:0006023	BP	aminoglycan biosynthetic process	109	15	0.117440182865565	1
GO:0006569	BP	tryptophan catabolic process	10	2	0.117494682671169	1
GO:0042436	BP	indole-containing compound catabolic process	10	2	0.117494682671169	1
GO:0046218	BP	indolalkylamine catabolic process	10	2	0.117494682671169	1
GO:0038093	BP	Fc receptor signaling pathway	173	21	0.117546321841669	1
GO:0099068	BP	postsynapse assembly	28	6	0.117645447235025	1
GO:0055065	BP	metal ion homeostasis	619	65	0.117739660696605	1
GO:0045471	BP	response to ethanol	116	15	0.117874822188676	1
GO:0015854	BP	guanine transport	1	1	0.118022260022906	1
GO:0035344	BP	hypoxanthine transport	1	1	0.118022260022906	1
GO:0035364	BP	thymine transport	1	1	0.118022260022906	1
GO:0044828	BP	negative regulation by host of viral genome replication	6	2	0.11822560366087	1
GO:0006686	BP	sphingomyelin biosynthetic process	6	2	0.11828808638212	1
GO:0051686	BP	establishment of ER localization	1	1	0.118410546295239	1
GO:0099089	BP	establishment of endoplasmic reticulum localization to postsynapse	1	1	0.118410546295239	1
GO:1990778	BP	protein localization to cell periphery	325	39	0.118437911877234	1
GO:0030593	BP	neutrophil chemotaxis	99	11	0.118454904165847	1
GO:1903353	BP	regulation of nucleus organization	1	1	0.118455288762081	1
GO:0016758	MF	transferase activity	transferring hexosyl groups	190	21	0.118500449202093	1
GO:0071305	BP	cellular response to vitamin D	22	4	0.118516566995545	1
GO:0098581	BP	detection of external biotic stimulus	24	4	0.118676933204188	1
GO:0031580	BP	membrane raft distribution	7	2	0.118684477076384	1
GO:0032309	BP	icosanoid secretion	45	6	0.118724060099391	1
GO:1901228	BP	positive regulation of transcription from RNA polymerase II promoter involved in heart development	5	2	0.118805483011602	1
GO:0031597	CC	cytosolic proteasome complex	8	2	0.118888034192832	1
GO:0043274	MF	phospholipase binding	13	3	0.118950889471524	1
GO:0009111	BP	vitamin catabolic process	14	3	0.119001352833603	1
GO:0007416	BP	synapse assembly	171	24	0.119198027771403	1
GO:0016114	BP	terpenoid biosynthetic process	15	3	0.119274188279271	1
GO:0032695	BP	negative regulation of interleukin-12 production	16	3	0.119496090130245	1
GO:0042799	MF	histone methyltransferase activity (H4-K20 specific)	5	2	0.119754622921818	1
GO:0045130	MF	keratan sulfotransferase activity	1	1	0.119776391311687	1
GO:0008076	CC	voltage-gated potassium channel complex	84	13	0.119788454745638	1
GO:0032594	BP	protein transport within lipid bilayer	7	2	0.119794591959705	1
GO:0045636	BP	positive regulation of melanocyte differentiation	5	2	0.119995638352159	1
GO:0090472	BP	dibasic protein processing	1	1	0.120277589643394	1
GO:1901390	BP	positive regulation of transforming growth factor beta activation	1	1	0.120277589643394	1
GO:1901392	BP	regulation of transforming growth factor beta1 activation	1	1	0.120277589643394	1
GO:1901394	BP	positive regulation of transforming growth factor beta1 activation	1	1	0.120277589643394	1
GO:0098944	CC	postsynaptic recycling endosome membrane	2	1	0.120355608191749	1
GO:0098949	CC	intrinsic component of postsynaptic endosome membrane	2	1	0.120355608191749	1
GO:0098951	CC	intrinsic component of postsynaptic recycling endosome membrane	2	1	0.120355608191749	1
GO:0099033	CC	anchored component of postsynaptic recycling endosome membrane	2	1	0.120355608191749	1
GO:0099034	CC	anchored component of postsynaptic endosome membrane	2	1	0.120355608191749	1
GO:0032771	BP	regulation of monophenol monooxygenase activity	1	1	0.12048336121794	1
GO:0032773	BP	positive regulation of monophenol monooxygenase activity	1	1	0.12048336121794	1
GO:0051796	BP	negative regulation of timing of catagen	1	1	0.12048336121794	1
GO:0060901	BP	regulation of hair cycle by canonical Wnt signaling pathway	1	1	0.12048336121794	1
GO:1902908	BP	regulation of melanosome transport	1	1	0.12048336121794	1
GO:1902910	BP	positive regulation of melanosome transport	1	1	0.12048336121794	1
GO:0010765	BP	positive regulation of sodium ion transport	32	6	0.120526726721939	1
GO:0042834	MF	peptidoglycan binding	17	3	0.120573746778858	1
GO:0045911	BP	positive regulation of DNA recombination	41	6	0.120642206459038	1
GO:0008495	MF	protoheme IX farnesyltransferase activity	1	1	0.12076204227606	1
GO:0048033	BP	heme o metabolic process	1	1	0.12076204227606	1
GO:0048034	BP	heme O biosynthetic process	1	1	0.12076204227606	1
GO:1900244	BP	positive regulation of synaptic vesicle endocytosis	7	2	0.12093716484034	1
GO:0042592	BP	homeostatic process	1864	183	0.121068428748433	1
GO:0005938	CC	cell cortex	293	37	0.12115049693517	1
GO:0016358	BP	dendrite development	227	31	0.121167249714419	1
GO:0071625	BP	vocalization behavior	15	4	0.121187422318273	1
GO:0030018	CC	Z disc	123	17	0.121242395766982	1
GO:0034374	BP	low-density lipoprotein particle remodeling	16	3	0.121274653492457	1
GO:0050770	BP	regulation of axonogenesis	174	25	0.121377878976713	1
GO:0016413	MF	O-acetyltransferase activity	7	2	0.121388811545336	1
GO:0032536	BP	regulation of cell projection size	12	3	0.121628734528041	1
GO:1904673	BP	negative regulation of somatic stem cell population maintenance	5	2	0.121730297459652	1
GO:0051259	BP	protein complex oligomerization	226	26	0.122377061384831	1
GO:0035312	MF	5'-3' exodeoxyribonuclease activity	8	2	0.122652108569578	1
GO:0040029	BP	regulation of gene expression	epigenetic	193	21	0.122764370743876	1
GO:0010585	BP	glutamine secretion	1	1	0.122764819648599	1
GO:1903803	BP	L-glutamine import across plasma membrane	1	1	0.122764819648599	1
GO:0000902	BP	cell morphogenesis	991	117	0.123040504925514	1
GO:0072559	CC	NLRP3 inflammasome complex	8	2	0.123116694663374	1
GO:1901836	BP	regulation of transcription of nucleolar large rRNA by RNA polymerase I	14	3	0.123143439591448	1
GO:0021822	BP	negative regulation of cell motility involved in cerebral cortex radial glia guided migration	1	1	0.123295078625373	1
GO:0005766	CC	primary lysosome	146	16	0.123382670153225	1
GO:0042582	CC	azurophil granule	146	16	0.123382670153225	1
GO:0005637	CC	nuclear inner membrane	58	8	0.123450815373792	1
GO:0005041	MF	low-density lipoprotein particle receptor activity	13	3	0.123512752137186	1
GO:0005112	MF	Notch binding	25	5	0.123532220744201	1
GO:0043515	MF	kinetochore binding	6	2	0.123539034129976	1
GO:0034380	BP	high-density lipoprotein particle assembly	16	3	0.123602877038113	1
GO:2001161	BP	negative regulation of histone H3-K79 methylation	1	1	0.123680164208437	1
GO:0072179	BP	nephric duct formation	5	2	0.123790805436365	1
GO:0008352	CC	katanin complex	1	1	0.123879212705569	1
GO:0017171	MF	serine hydrolase activity	173	18	0.124007950831273	1
GO:0015079	MF	potassium ion transmembrane transporter activity	149	20	0.124071764643536	1
GO:0000793	CC	condensed chromosome	202	22	0.124177487373477	1
GO:0061673	CC	mitotic spindle astral microtubule	7	2	0.124193249624204	1
GO:0033127	BP	regulation of histone phosphorylation	12	3	0.124414410479434	1
GO:0070345	BP	negative regulation of fat cell proliferation	5	2	0.124794424479492	1
GO:0010991	BP	negative regulation of SMAD protein complex assembly	5	2	0.124796777280166	1
GO:1901142	BP	insulin metabolic process	7	2	0.124983854670478	1
GO:0071360	BP	cellular response to exogenous dsRNA	15	3	0.125019527474974	1
GO:0052547	BP	regulation of peptidase activity	440	44	0.125111048664781	1
GO:0000707	BP	meiotic DNA recombinase assembly	2	1	0.125257187615348	1
GO:0044827	BP	modulation by host of viral genome replication	15	3	0.125350302258947	1
GO:0009074	BP	aromatic amino acid family catabolic process	28	4	0.125528057377071	1
GO:0005828	CC	kinetochore microtubule	7	2	0.125542801239261	1
GO:0035565	BP	regulation of pronephros size	1	1	0.125553535031659	1
GO:0061017	BP	hepatoblast differentiation	1	1	0.125553535031659	1
GO:0061206	BP	mesonephros morphogenesis	1	1	0.125553535031659	1
GO:0061215	BP	mesonephric nephron development	1	1	0.125553535031659	1
GO:0061228	BP	mesonephric nephron morphogenesis	1	1	0.125553535031659	1
GO:0061235	BP	mesenchymal stem cell maintenance involved in mesonephric nephron morphogenesis	1	1	0.125553535031659	1
GO:0061295	BP	regulation of mesenchymal cell apoptotic process involved in mesonephric nephron morphogenesis	1	1	0.125553535031659	1
GO:0061296	BP	negative regulation of mesenchymal cell apoptotic process involved in mesonephric nephron morphogenesis	1	1	0.125553535031659	1
GO:1901146	BP	mesenchymal cell apoptotic process involved in mesonephric nephron morphogenesis	1	1	0.125553535031659	1
GO:0031581	BP	hemidesmosome assembly	12	3	0.125560374167829	1
GO:0051299	BP	centrosome separation	15	3	0.125700283782915	1
GO:0070982	BP	L-asparagine metabolic process	2	1	0.125870215205003	1
GO:0035473	MF	lipase binding	6	2	0.126127866733953	1
GO:0043416	BP	regulation of skeletal muscle tissue regeneration	7	2	0.126146076246996	1
GO:0050665	BP	hydrogen peroxide biosynthetic process	13	3	0.126273642267586	1
GO:0034263	BP	positive regulation of autophagy in response to ER overload	1	1	0.126564803044104	1
GO:0060707	BP	trophoblast giant cell differentiation	14	3	0.126729332225698	1
GO:0042491	BP	inner ear auditory receptor cell differentiation	35	6	0.126772522105803	1
GO:0061512	BP	protein localization to cilium	58	8	0.127173013412564	1
GO:0004820	MF	glycine-tRNA ligase activity	1	1	0.127223090021428	1
GO:0006426	BP	glycyl-tRNA aminoacylation	1	1	0.127223090021428	1
GO:0070150	BP	mitochondrial glycyl-tRNA aminoacylation	1	1	0.127223090021428	1
GO:0032400	BP	melanosome localization	23	4	0.127460042282388	1
GO:0007512	BP	adult heart development	13	3	0.127463613751087	1
GO:0034706	CC	sodium channel complex	26	5	0.127532551799999	1
GO:0031077	BP	post-embryonic camera-type eye development	7	2	0.127561470259395	1
GO:0019888	MF	protein phosphatase regulator activity	80	11	0.127592848196906	1
GO:0016709	MF	oxidoreductase activity	acting on paired donors	with incorporation or reduction of molecular oxygen	NAD(P)H as one donor	and incorporation of one atom of oxygen	45	6	0.127593163342736	1
GO:0140196	BP	positive regulation of adenylate cyclase-activating adrenergic receptor signaling pathway involved in heart process	1	1	0.127658991714876	1
GO:0055082	BP	cellular chemical homeostasis	780	80	0.127783453776609	1
GO:0032206	BP	positive regulation of telomere maintenance	47	7	0.127838355656664	1
GO:0007020	BP	microtubule nucleation	28	5	0.128028458672682	1
GO:0010902	BP	positive regulation of very-low-density lipoprotein particle remodeling	2	1	0.12813270335185	1
GO:0032419	CC	extrinsic component of lysosome membrane	1	1	0.128294954212716	1
GO:1902586	BP	multi-organism intercellular transport	1	1	0.128294954212716	1
GO:0017060	MF	3-galactosyl-N-acetylglucosaminide 4-alpha-L-fucosyltransferase activity	2	1	0.128361346607092	1
GO:0046832	BP	negative regulation of RNA export from nucleus	2	1	0.128457221762972	1
GO:0051651	BP	maintenance of location in cell	206	24	0.128517148345156	1
GO:0002116	CC	semaphorin receptor complex	9	3	0.128729946701264	1
GO:0035385	BP	Roundabout signaling pathway	5	2	0.128761440203088	1
GO:0070873	BP	regulation of glycogen metabolic process	34	6	0.128793973424731	1
GO:0033044	BP	regulation of chromosome organization	338	37	0.129143102903222	1
GO:0010971	BP	positive regulation of G2/M transition of mitotic cell cycle	26	5	0.129180183494344	1
GO:0051904	BP	pigment granule transport	22	4	0.129292228291996	1
GO:0051905	BP	establishment of pigment granule localization	22	4	0.129292228291996	1
GO:0098845	CC	postsynaptic endosome	14	3	0.129296214950053	1
GO:0051336	BP	regulation of hydrolase activity	1233	123	0.129359657966701	1
GO:0008092	MF	cytoskeletal protein binding	933	103	0.129365876201774	1
GO:1905809	BP	negative regulation of synapse organization	24	5	0.129440802357426	1
GO:0052548	BP	regulation of endopeptidase activity	409	41	0.129710405146673	1
GO:0050804	BP	modulation of chemical synaptic transmission	440	54	0.129877682124316	1
GO:0048561	BP	establishment of animal organ orientation	1	1	0.129922452054835	1
GO:0071205	BP	protein localization to juxtaparanode region of axon	5	2	0.129956814535719	1
GO:0018733	MF	3	4-dihydrocoumarin hydrolase activity	1	1	0.1300675622652	1
GO:0046226	BP	coumarin catabolic process	1	1	0.1300675622652	1
GO:0046271	BP	phenylpropanoid catabolic process	1	1	0.1300675622652	1
GO:0046475	BP	glycerophospholipid catabolic process	31	5	0.130122739331171	1
GO:0048232	BP	male gamete generation	510	50	0.130158634220374	1
GO:0035747	BP	natural killer cell chemotaxis	10	2	0.130397494971187	1
GO:0007179	BP	transforming growth factor beta receptor signaling pathway	194	24	0.130420482370774	1
GO:0048747	BP	muscle fiber development	58	9	0.13060119183385	1
GO:0034614	BP	cellular response to reactive oxygen species	161	19	0.130748363259633	1
GO:0048285	BP	organelle fission	461	47	0.130962994360174	1
GO:1902036	BP	regulation of hematopoietic stem cell differentiation	71	10	0.131204125200347	1
GO:0060629	BP	regulation of homologous chromosome segregation	2	1	0.131210585003987	1
GO:0051261	BP	protein depolymerization	109	15	0.131397689872455	1
GO:1904826	BP	regulation of hydrogen sulfide biosynthetic process	2	1	0.131418591480861	1
GO:2001034	BP	positive regulation of double-strand break repair via nonhomologous end joining	15	3	0.1314970262453	1
GO:0033961	MF	cis-stilbene-oxide hydrolase activity	1	1	0.131723827237087	1
GO:0032580	CC	Golgi cisterna membrane	74	10	0.132060359797828	1
GO:0005978	BP	glycogen biosynthetic process	44	7	0.132196185400605	1
GO:0009250	BP	glucan biosynthetic process	44	7	0.132196185400605	1
GO:0006405	BP	RNA export from nucleus	135	15	0.132223660423435	1
GO:0004421	MF	hydroxymethylglutaryl-CoA synthase activity	2	1	0.13225831145691	1
GO:0010142	BP	farnesyl diphosphate biosynthetic process	mevalonate pathway	2	1	0.13225831145691	1
GO:1902767	BP	isoprenoid biosynthetic process via mevalonate	2	1	0.13225831145691	1
GO:0099177	BP	regulation of trans-synaptic signaling	441	54	0.132387026940961	1
GO:0004831	MF	tyrosine-tRNA ligase activity	2	1	0.132415185204466	1
GO:0006437	BP	tyrosyl-tRNA aminoacylation	2	1	0.132415185204466	1
GO:0060696	BP	regulation of phospholipid catabolic process	7	2	0.13260871365573	1
GO:0002589	BP	regulation of antigen processing and presentation of peptide antigen via MHC class I	2	1	0.132825948496251	1
GO:0002590	BP	negative regulation of antigen processing and presentation of peptide antigen via MHC class I	2	1	0.132825948496251	1
GO:0032803	BP	regulation of low-density lipoprotein particle receptor catabolic process	6	2	0.132900473666983	1
GO:0086041	MF	voltage-gated potassium channel activity involved in SA node cell action potential depolarization	1	1	0.13304203653222	1
GO:0006646	BP	phosphatidylethanolamine biosynthetic process	15	3	0.13313591327635	1
GO:1902742	BP	apoptotic process involved in development	39	7	0.133209036946848	1
GO:0007422	BP	peripheral nervous system development	76	12	0.133681290505397	1
GO:0034231	BP	islet amyloid polypeptide processing	1	1	0.133825193958153	1
GO:0051305	BP	chromosome movement towards spindle pole	7	2	0.133843441837641	1
GO:0015026	MF	coreceptor activity	45	7	0.133935217672927	1
GO:0042599	CC	lamellar body	17	3	0.133974725985316	1
GO:0070840	MF	dynein complex binding	21	4	0.134022765321181	1
GO:0009891	BP	positive regulation of biosynthetic process	1882	193	0.134050333277315	1
GO:0045031	MF	G protein-coupled ATP receptor activity	2	1	0.134078196939644	1
GO:0001554	BP	luteolysis	7	2	0.134154458977633	1
GO:0008194	MF	UDP-glycosyltransferase activity	134	16	0.134199580367403	1
GO:0042392	MF	sphingosine-1-phosphate phosphatase activity	7	2	0.134217186488558	1
GO:0007204	BP	positive regulation of cytosolic calcium ion concentration	303	34	0.134241146992788	1
GO:0014745	BP	negative regulation of muscle adaptation	12	3	0.134369061335254	1
GO:0016266	BP	O-glycan processing	55	8	0.134460761559302	1
GO:0098533	CC	ATPase dependent transmembrane transport complex	23	4	0.134502079648943	1
GO:0071133	CC	alpha9-beta1 integrin-ADAM8 complex	1	1	0.13465066594852	1
GO:0072680	BP	extracellular matrix-dependent thymocyte migration	1	1	0.13465066594852	1
GO:0072681	BP	fibronectin-dependent thymocyte migration	1	1	0.13465066594852	1
GO:2000413	BP	regulation of fibronectin-dependent thymocyte migration	1	1	0.13465066594852	1
GO:2000415	BP	positive regulation of fibronectin-dependent thymocyte migration	1	1	0.13465066594852	1
GO:0006047	BP	UDP-N-acetylglucosamine metabolic process	15	3	0.134712651984066	1
GO:0047760	MF	butyrate-CoA ligase activity	9	2	0.134727834942064	1
GO:0006500	BP	N-terminal protein palmitoylation	2	1	0.134728641016169	1
GO:0005585	CC	collagen type II trimer	1	1	0.134787443475776	1
GO:0019894	MF	kinesin binding	43	7	0.134846661891724	1
GO:0005242	MF	inward rectifier potassium channel activity	21	4	0.134890327902878	1
GO:0044550	BP	secondary metabolite biosynthetic process	23	4	0.134932748628621	1
GO:1904205	BP	negative regulation of skeletal muscle hypertrophy	1	1	0.135047939422104	1
GO:0003414	BP	chondrocyte morphogenesis involved in endochondral bone morphogenesis	1	1	0.135134590340736	1
GO:0003429	BP	growth plate cartilage chondrocyte morphogenesis	1	1	0.135134590340736	1
GO:0090171	BP	chondrocyte morphogenesis	1	1	0.135134590340736	1
GO:0050801	BP	ion homeostasis	777	79	0.135181191254653	1
GO:0060666	BP	dichotomous subdivision of terminal units involved in salivary gland branching	5	2	0.135274980878161	1
GO:0061003	BP	positive regulation of dendritic spine morphogenesis	18	4	0.135455690816606	1
GO:0038037	CC	G protein-coupled receptor dimeric complex	7	2	0.135506644684691	1
GO:0003167	BP	atrioventricular bundle cell differentiation	1	1	0.1355172518278	1
GO:0035037	BP	sperm entry	1	1	0.135578807933138	1
GO:0061795	BP	Golgi lumen acidification	1	1	0.135578807933138	1
GO:1905526	BP	regulation of Golgi lumen acidification	1	1	0.135578807933138	1
GO:1905528	BP	positive regulation of Golgi lumen acidification	1	1	0.135578807933138	1
GO:0016332	BP	establishment or maintenance of polarity of embryonic epithelium	1	1	0.135615719959536	1
GO:0072060	BP	outer medullary collecting duct development	1	1	0.135615719959536	1
GO:0047369	MF	succinate-hydroxymethylglutarate CoA-transferase activity	1	1	0.135640318981427	1
GO:0033235	BP	positive regulation of protein sumoylation	13	3	0.135662936754983	1
GO:0003845	MF	11-beta-hydroxysteroid dehydrogenase [NAD(P)] activity	2	1	0.135675928243025	1
GO:0032990	BP	cell part morphogenesis	670	83	0.135758607408642	1
GO:0009159	BP	deoxyribonucleoside monophosphate catabolic process	2	1	0.1359360788503	1
GO:0072205	BP	metanephric collecting duct development	11	3	0.136027064088218	1
GO:2000156	BP	regulation of retrograde vesicle-mediated transport	Golgi to ER	2	1	0.136381629876863	1
GO:0030173	CC	integral component of Golgi membrane	56	8	0.136408257683001	1
GO:0046469	BP	platelet activating factor metabolic process	8	2	0.136573682878883	1
GO:0048678	BP	response to axon injury	77	11	0.136602747790782	1
GO:0042770	BP	signal transduction in response to DNA damage	129	16	0.136609004961796	1
GO:1990617	CC	CHOP-ATF4 complex	2	1	0.136913624291067	1
GO:0008324	MF	cation transmembrane transporter activity	600	65	0.136944262014882	1
GO:0043394	MF	proteoglycan binding	36	6	0.13713443176037	1
GO:0019060	BP	intracellular transport of viral protein in host cell	2	1	0.13715798191497	1
GO:0030581	BP	symbiont intracellular protein transport in host	2	1	0.13715798191497	1
GO:0008569	MF	ATP-dependent microtubule motor activity	minus-end-directed	18	4	0.137288144453709	1
GO:0035683	BP	memory T cell extravasation	2	1	0.137336344077829	1
GO:0048669	BP	collateral sprouting in absence of injury	5	2	0.137556871578328	1
GO:0018153	BP	isopeptide cross-linking via N6-(L-isoglutamyl)-L-lysine	2	1	0.137620685772582	1
GO:0018262	BP	isopeptide cross-linking	2	1	0.137620685772582	1
GO:0052651	BP	monoacylglycerol catabolic process	7	2	0.137667180562357	1
GO:0045188	BP	regulation of circadian sleep/wake cycle	non-REM sleep	8	2	0.137769819626879	1
GO:0004666	MF	prostaglandin-endoperoxide synthase activity	2	1	0.137984110101975	1
GO:0035685	BP	helper T cell diapedesis	2	1	0.138081631920288	1
GO:0034433	BP	steroid esterification	18	3	0.138200121793201	1
GO:0034434	BP	sterol esterification	18	3	0.138200121793201	1
GO:0034435	BP	cholesterol esterification	18	3	0.138200121793201	1
GO:1902307	BP	positive regulation of sodium ion transmembrane transport	19	4	0.138511993810871	1
GO:0021541	BP	ammon gyrus development	1	1	0.138519740049342	1
GO:0004535	MF	poly(A)-specific ribonuclease activity	14	3	0.138549552668576	1
GO:0009887	BP	animal organ morphogenesis	1055	119	0.138635784916449	1
GO:0004906	MF	interferon-gamma receptor activity	2	1	0.138663906862493	1
GO:0060316	BP	positive regulation of ryanodine-sensitive calcium-release channel activity	8	2	0.138823797928781	1
GO:0008201	MF	heparin binding	167	20	0.138886048131805	1
GO:0019862	MF	IgA binding	3	1	0.1390345295718	1
GO:0009692	BP	ethylene metabolic process	1	1	0.139102640395701	1
GO:0016711	MF	flavonoid 3'-monooxygenase activity	1	1	0.139102640395701	1
GO:0019341	BP	dibenzo-p-dioxin catabolic process	1	1	0.139102640395701	1
GO:0046168	BP	glycerol-3-phosphate catabolic process	2	1	0.139119860605866	1
GO:0061847	BP	response to cholecystokinin	2	1	0.139348403148042	1
GO:0000056	BP	ribosomal small subunit export from nucleus	8	2	0.139370127498577	1
GO:0032881	BP	regulation of polysaccharide metabolic process	42	7	0.139436973246999	1
GO:0032127	CC	dense core granule membrane	6	2	0.139570244655287	1
GO:0031432	MF	titin binding	14	3	0.13966610130633	1
GO:0006591	BP	ornithine metabolic process	8	2	0.139670818449707	1
GO:0072571	MF	mono-ADP-D-ribose binding	1	1	0.139742301728644	1
GO:0014886	BP	transition between slow and fast fiber	1	1	0.139860493254507	1
GO:1905843	BP	regulation of cellular response to gamma radiation	1	1	0.13995499446573	1
GO:0071356	BP	cellular response to tumor necrosis factor	284	29	0.139962061715972	1
GO:0048698	BP	negative regulation of collateral sprouting in absence of injury	1	1	0.14022645085886	1
GO:0045630	BP	positive regulation of T-helper 2 cell differentiation	7	2	0.140319448125949	1
GO:0040009	BP	regulation of growth rate	7	2	0.140364544994152	1
GO:0098753	CC	anchored component of the cytoplasmic side of the plasma membrane	1	1	0.14056829791615	1
GO:0010569	BP	regulation of double-strand break repair via homologous recombination	41	6	0.140607352196603	1
GO:0001868	BP	regulation of complement activation	lectin pathway	2	1	0.140607857572133	1
GO:0001869	BP	negative regulation of complement activation	lectin pathway	2	1	0.140607857572133	1
GO:0098038	BP	non-replicative transposition	DNA-mediated	1	1	0.140780287543527	1
GO:1902310	BP	positive regulation of peptidyl-serine dephosphorylation	2	1	0.140780764087306	1
GO:0061402	BP	positive regulation of transcription from RNA polymerase II promoter in response to acidic pH	2	1	0.140882327582769	1
GO:0015556	MF	C4-dicarboxylate transmembrane transporter activity	15	3	0.14091767100078	1
GO:0097117	BP	guanylate kinase-associated protein clustering	1	1	0.140956857073679	1
GO:0046831	BP	regulation of RNA export from nucleus	15	3	0.140977570342634	1
GO:0005167	MF	neurotrophin TRK receptor binding	6	2	0.141031041500614	1
GO:0005168	MF	neurotrophin TRKA receptor binding	6	2	0.141031041500614	1
GO:1903226	BP	positive regulation of endodermal cell differentiation	1	1	0.141109831096807	1
GO:0016596	MF	thienylcyclohexylpiperidine binding	1	1	0.14112159659525	1
GO:0030001	BP	metal ion transport	867	91	0.141185370709249	1
GO:0008179	MF	adenylate cyclase binding	13	3	0.141378691904605	1
GO:0043954	BP	cellular component maintenance	59	9	0.141402681873175	1
GO:0070127	BP	tRNA aminoacylation for mitochondrial protein translation	8	2	0.141480366646485	1
GO:1903726	BP	negative regulation of phospholipid metabolic process	13	3	0.141488314007972	1
GO:0018277	BP	protein deamination	1	1	0.141556802581184	1
GO:0019056	BP	modulation by virus of host transcription	1	1	0.141627363591588	1
GO:0052026	BP	modulation by symbiont of host transcription	1	1	0.141627363591588	1
GO:0052312	BP	modulation of transcription in other organism involved in symbiotic interaction	1	1	0.141627363591588	1
GO:0006910	BP	phagocytosis	recognition	15	3	0.141631496823489	1
GO:0140328	MF	floppase activity	6	2	0.141636317881031	1
GO:0047322	MF	[hydroxymethylglutaryl-CoA reductase (NADPH)] kinase activity	2	1	0.141724701378192	1
GO:0050405	MF	[acetyl-CoA carboxylase] kinase activity	2	1	0.141724701378192	1
GO:0034342	BP	response to type III interferon	2	1	0.141810854318801	1
GO:0060536	BP	cartilage morphogenesis	12	3	0.141903862352321	1
GO:0019966	MF	interleukin-1 binding	9	2	0.141948744940482	1
GO:0030424	CC	axon	614	72	0.141958424408387	1
GO:0008478	MF	pyridoxal kinase activity	1	1	0.142074268142087	1
GO:0009443	BP	pyridoxal 5'-phosphate salvage	1	1	0.142074268142087	1
GO:0030395	MF	lactose binding	2	1	0.142397303284744	1
GO:0110026	BP	regulation of DNA strand resection involved in replication fork processing	1	1	0.142427231008471	1
GO:0015186	MF	L-glutamine transmembrane transporter activity	7	2	0.142513162277544	1
GO:1901675	BP	negative regulation of histone H3-K27 acetylation	1	1	0.142533165885441	1
GO:0046958	BP	nonassociative learning	6	2	0.142813594567413	1
GO:0006613	BP	cotranslational protein targeting to membrane	94	10	0.142836651706282	1
GO:1990589	CC	ATF4-CREB1 transcription factor complex	2	1	0.142886619161574	1
GO:0030154	BP	cell differentiation	4091	400	0.143309862371955	1
GO:0098875	CC	epididymosome	1	1	0.143334676545255	1
GO:0019303	BP	D-ribose catabolic process	2	1	0.143359185149189	1
GO:0071207	MF	histone pre-mRNA stem-loop binding	2	1	0.143452157076496	1
GO:1900827	BP	positive regulation of membrane depolarization during cardiac muscle cell action potential	1	1	0.143547273062538	1
GO:0034638	BP	phosphatidylcholine catabolic process	15	3	0.143680665814021	1
GO:0099505	BP	regulation of presynaptic membrane potential	6	2	0.143744391815589	1
GO:1990005	CC	granular vesicle	2	1	0.1438018583855	1
GO:0007531	BP	mating type determination	2	1	0.143964156489505	1
GO:0007533	BP	mating type switching	2	1	0.143964156489505	1
GO:0022413	BP	reproductive process in single-celled organism	2	1	0.143964156489505	1
GO:0031494	BP	regulation of mating type switching	2	1	0.143964156489505	1
GO:0032505	BP	reproduction of a single-celled organism	2	1	0.143964156489505	1
GO:0071515	BP	genetic imprinting at mating-type locus	2	1	0.143964156489505	1
GO:0006690	BP	icosanoid metabolic process	112	12	0.144066879373353	1
GO:1990590	CC	ATF1-ATF4 transcription factor complex	2	1	0.144093514501181	1
GO:0009956	BP	radial pattern formation	1	1	0.144162822210992	1
GO:0061999	BP	regulation of cardiac endothelial to mesenchymal transition	1	1	0.144257733985675	1
GO:0062000	BP	positive regulation of cardiac endothelial to mesenchymal transition	1	1	0.144257733985675	1
GO:1903564	BP	regulation of protein localization to cilium	8	2	0.144341373163449	1
GO:0070287	MF	ferritin receptor activity	1	1	0.14438834240179	1
GO:0002436	BP	immune complex clearance by monocytes and macrophages	3	1	0.144887368863002	1
GO:0090264	BP	regulation of immune complex clearance by monocytes and macrophages	3	1	0.144887368863002	1
GO:0036491	BP	regulation of translation initiation in response to endoplasmic reticulum stress	7	2	0.145262102186222	1
GO:0018964	BP	propylene metabolic process	1	1	0.145342437814347	1
GO:0003827	MF	alpha-1	3-mannosylglycoprotein 2-beta-N-acetylglucosaminyltransferase activity	1	1	0.145366397162376	1
GO:0006049	BP	UDP-N-acetylglucosamine catabolic process	1	1	0.145366397162376	1
GO:0006611	BP	protein export from nucleus	175	19	0.145537682958673	1
GO:0005666	CC	RNA polymerase III complex	18	3	0.145632806586346	1
GO:0006867	BP	asparagine transport	2	1	0.145639247263665	1
GO:0015182	MF	L-asparagine transmembrane transporter activity	2	1	0.145639247263665	1
GO:0070259	MF	tyrosyl-DNA phosphodiesterase activity	2	1	0.145681507404044	1
GO:0051291	BP	protein heterooligomerization	22	4	0.14576786111259	1
GO:0070942	BP	neutrophil mediated cytotoxicity	10	2	0.145869390724224	1
GO:1903567	BP	regulation of protein localization to ciliary membrane	2	1	0.145900047228094	1
GO:0048789	BP	cytoskeletal matrix organization at active zone	1	1	0.145943233429293	1
GO:0097115	BP	neurexin clustering involved in presynaptic membrane assembly	1	1	0.145943233429293	1
GO:1905518	BP	regulation of presynaptic active zone assembly	1	1	0.145943233429293	1
GO:1905520	BP	positive regulation of presynaptic active zone assembly	1	1	0.145943233429293	1
GO:0048854	BP	brain morphogenesis	34	6	0.145956068784165	1
GO:1902287	BP	semaphorin-plexin signaling pathway involved in axon guidance	10	3	0.146009200023047	1
GO:0005545	MF	1-phosphatidylinositol binding	14	3	0.146076355809511	1
GO:0022417	BP	protein maturation by protein folding	8	2	0.14627676118093	1
GO:0010767	BP	regulation of transcription from RNA polymerase II promoter in response to UV-induced DNA damage	2	1	0.146334518390312	1
GO:0006024	BP	glycosaminoglycan biosynthetic process	102	14	0.14643930344448	1
GO:0006568	BP	tryptophan metabolic process	11	2	0.146662384890152	1
GO:0034220	BP	ion transmembrane transport	1090	113	0.146751849769841	1
GO:0019150	MF	D-ribulokinase activity	1	1	0.14675491579477	1
GO:0030643	BP	cellular phosphate ion homeostasis	8	2	0.146925507284635	1
GO:0072501	BP	cellular divalent inorganic anion homeostasis	8	2	0.146925507284635	1
GO:0072502	BP	cellular trivalent inorganic anion homeostasis	8	2	0.146925507284635	1
GO:0090282	BP	positive regulation of transcription involved in G2/M transition of mitotic cell cycle	1	1	0.147194602611505	1
GO:1990939	MF	ATP-dependent microtubule motor activity	34	6	0.147268872328384	1
GO:0048266	BP	behavioral response to pain	13	3	0.147343637218836	1
GO:0051289	BP	protein homotetramerization	57	8	0.147714733519408	1
GO:0031798	MF	type 1 metabotropic glutamate receptor binding	1	1	0.147748126057526	1
GO:0061828	CC	apical tubulobulbar complex	1	1	0.147748126057526	1
GO:0061829	CC	basal tubulobulbar complex	1	1	0.147748126057526	1
GO:0043292	CC	contractile fiber	230	27	0.14781292337529	1
GO:0005595	CC	collagen type XII trimer	1	1	0.147859385053672	1
GO:0006045	BP	N-acetylglucosamine biosynthetic process	2	1	0.147860833908083	1
GO:1901073	BP	glucosamine-containing compound biosynthetic process	2	1	0.147860833908083	1
GO:0035315	BP	hair cell differentiation	44	7	0.148313590472407	1
GO:0034515	CC	proteasome storage granule	2	1	0.148353759267517	1
GO:0007634	BP	optokinetic behavior	2	1	0.148355362385441	1
GO:0006083	BP	acetate metabolic process	2	1	0.14837610434741	1
GO:0019413	BP	acetate biosynthetic process	2	1	0.14837610434741	1
GO:0019427	BP	acetyl-CoA biosynthetic process from acetate	2	1	0.14837610434741	1
GO:0019542	BP	propionate biosynthetic process	2	1	0.14837610434741	1
GO:0030037	BP	actin filament reorganization involved in cell cycle	1	1	0.148431102440815	1
GO:0098660	BP	inorganic ion transmembrane transport	816	86	0.148451580126084	1
GO:0042440	BP	pigment metabolic process	66	8	0.148508259581593	1
GO:0042758	BP	long-chain fatty acid catabolic process	10	2	0.148511882161525	1
GO:0019317	BP	fucose catabolic process	9	2	0.148522006657602	1
GO:0042354	BP	L-fucose metabolic process	9	2	0.148522006657602	1
GO:0042355	BP	L-fucose catabolic process	9	2	0.148522006657602	1
GO:0019065	BP	receptor-mediated endocytosis of virus by host cell	7	2	0.148548431410509	1
GO:0075509	BP	endocytosis involved in viral entry into host cell	7	2	0.148548431410509	1
GO:0010557	BP	positive regulation of macromolecule biosynthetic process	1743	180	0.148560193940719	1
GO:0051758	BP	homologous chromosome movement towards spindle pole in meiosis I anaphase	1	1	0.14868133125075	1
GO:0140042	BP	lipid droplet formation	9	2	0.148692252677997	1
GO:0000213	MF	tRNA-intron endonuclease activity	2	1	0.148996595495219	1
GO:0043044	BP	ATP-dependent chromatin remodeling	83	10	0.149137238601402	1
GO:0050000	BP	chromosome localization	79	10	0.149191352863792	1
GO:0051303	BP	establishment of chromosome localization	79	10	0.149191352863792	1
GO:1901216	BP	positive regulation of neuron death	93	13	0.14921027822412	1
GO:0010725	BP	regulation of primitive erythrocyte differentiation	1	1	0.149222937545728	1
GO:0035854	BP	eosinophil fate commitment	1	1	0.149222937545728	1
GO:0034249	BP	negative regulation of cellular amide metabolic process	222	22	0.149227018751361	1
GO:0097242	BP	amyloid-beta clearance	37	6	0.149299164288608	1
GO:0097344	CC	Rix1 complex	2	1	0.149341905498423	1
GO:0030427	CC	site of polarized growth	179	24	0.149497754293515	1
GO:0021819	BP	layer formation in cerebral cortex	12	3	0.149503864508499	1
GO:0000278	BP	mitotic cell cycle	1015	100	0.149639421626715	1
GO:0046603	BP	negative regulation of mitotic centrosome separation	1	1	0.149718707657393	1
GO:0010966	BP	regulation of phosphate transport	8	2	0.149913381973961	1
GO:0032007	BP	negative regulation of TOR signaling	41	6	0.150052259926932	1
GO:1990134	BP	epithelial cell apoptotic process involved in palatal shelf morphogenesis	1	1	0.150064639398259	1
GO:1900223	BP	positive regulation of amyloid-beta clearance	7	2	0.150182729333083	1
GO:0005600	CC	collagen type XIII trimer	1	1	0.150399972808015	1
GO:0030936	CC	transmembrane collagen trimer	1	1	0.150399972808015	1
GO:0035725	BP	sodium ion transmembrane transport	165	21	0.150449758227975	1
GO:0009304	BP	tRNA transcription	8	2	0.150471484366936	1
GO:0061736	BP	engulfment of target by autophagosome	1	1	0.150581473634761	1
GO:0061753	BP	substrate localization to autophagosome	1	1	0.150581473634761	1
GO:1990167	BP	protein K27-linked deubiquitination	2	1	0.15077973294155	1
GO:0031877	MF	somatostatin receptor binding	1	1	0.150828881316145	1
GO:0050894	BP	determination of affect	1	1	0.150828881316145	1
GO:0097305	BP	response to alcohol	226	26	0.150876546239417	1
GO:1901681	MF	sulfur compound binding	258	29	0.151067419670043	1
GO:0008142	MF	oxysterol binding	7	2	0.151221063542572	1
GO:0022410	BP	circadian sleep/wake cycle process	25	4	0.151394223819184	1
GO:0090169	BP	regulation of spindle assembly	24	4	0.151457612852342	1
GO:0050998	MF	nitric-oxide synthase binding	13	3	0.15146736717059	1
GO:0021988	BP	olfactory lobe development	32	6	0.151606197985292	1
GO:0098674	CC	extrinsic component of neuronal dense core vesicle membrane	1	1	0.151618817700942	1
GO:0098922	CC	extrinsic component of dense core granule membrane	1	1	0.151618817700942	1
GO:0001675	BP	acrosome assembly	18	3	0.151758995897125	1
GO:0009072	BP	aromatic amino acid family metabolic process	39	5	0.151782429892722	1
GO:0031592	CC	centrosomal corona	1	1	0.15179179662076	1
GO:0021634	BP	optic nerve formation	1	1	0.151871861849283	1
GO:0035566	BP	regulation of metanephros size	1	1	0.151871861849283	1
GO:0061360	BP	optic chiasma development	1	1	0.151871861849283	1
GO:2000595	BP	regulation of optic nerve formation	1	1	0.151871861849283	1
GO:2000597	BP	positive regulation of optic nerve formation	1	1	0.151871861849283	1
GO:0008955	MF	peptidoglycan glycosyltransferase activity	1	1	0.151898582690619	1
GO:0034506	CC	chromosome	centromeric core domain	1	1	0.151925319819939	1
GO:0038026	BP	reelin-mediated signaling pathway	7	2	0.152008730229527	1
GO:0061656	MF	SUMO conjugating enzyme activity	1	1	0.152193595854608	1
GO:1903182	BP	regulation of SUMO transferase activity	1	1	0.152193595854608	1
GO:1903755	BP	positive regulation of SUMO transferase activity	1	1	0.152193595854608	1
GO:1990356	CC	sumoylated E2 ligase complex	1	1	0.152193595854608	1
GO:1903056	BP	regulation of melanosome organization	1	1	0.15228788544061	1
GO:0031225	CC	anchored component of membrane	162	19	0.152292087290285	1
GO:2000302	BP	positive regulation of synaptic vesicle exocytosis	12	3	0.152455483459628	1
GO:0007163	BP	establishment or maintenance of cell polarity	214	27	0.15289291942186	1
GO:0042988	MF	X11-like protein binding	1	1	0.15295377439886	1
GO:0098897	CC	spine apparatus membrane	1	1	0.15295377439886	1
GO:0098952	CC	intrinsic component of spine apparatus membrane	1	1	0.15295377439886	1
GO:0099065	CC	integral component of spine apparatus membrane	1	1	0.15295377439886	1
GO:1903818	BP	positive regulation of voltage-gated potassium channel activity	16	3	0.15298786364483	1
GO:0031962	MF	mineralocorticoid receptor binding	1	1	0.153077220052506	1
GO:0061767	BP	negative regulation of lung blood pressure	1	1	0.153077220052506	1
GO:0035804	MF	structural constituent of egg coat	3	1	0.153164011407101	1
GO:0030903	BP	notochord development	19	4	0.153168303869942	1
GO:1902338	BP	negative regulation of apoptotic process involved in morphogenesis	6	2	0.153196648295962	1
GO:1904746	BP	negative regulation of apoptotic process involved in development	6	2	0.153196648295962	1
GO:0033293	MF	monocarboxylic acid binding	72	9	0.153221975263478	1
GO:0008236	MF	serine-type peptidase activity	169	17	0.15324356102176	1
GO:0017148	BP	negative regulation of translation	204	20	0.153284604564619	1
GO:0004483	MF	mRNA (nucleoside-2'-O-)-methyltransferase activity	2	1	0.153415268162909	1
GO:0036451	BP	cap mRNA methylation	2	1	0.153415268162909	1
GO:0097309	BP	cap1 mRNA methylation	2	1	0.153415268162909	1
GO:2000485	BP	regulation of glutamine transport	2	1	0.153540179668766	1
GO:0048731	BP	system development	4760	464	0.153561402189156	1
GO:0051665	BP	membrane raft localization	8	2	0.153569462090513	1
GO:1905059	MF	calcium-transporting ATPase activity involved in regulation of postsynaptic cytosolic calcium ion concentration	1	1	0.153588538679762	1
GO:0007183	BP	SMAD protein complex assembly	13	3	0.153624175551022	1
GO:0098909	BP	regulation of cardiac muscle cell action potential involved in regulation of contraction	7	2	0.153865539285369	1
GO:0000132	BP	establishment of mitotic spindle orientation	30	5	0.153976318495289	1
GO:1990454	CC	L-type voltage-gated calcium channel complex	12	3	0.153984883265698	1
GO:0097433	CC	dense body	6	2	0.154021972955167	1
GO:0008090	BP	retrograde axonal transport	20	4	0.154132634816074	1
GO:0033218	MF	amide binding	353	38	0.154382899968712	1
GO:0034224	BP	cellular response to zinc ion starvation	2	1	0.154391819821337	1
GO:0120127	BP	response to zinc ion starvation	2	1	0.154391819821337	1
GO:0010501	BP	RNA secondary structure unwinding	7	2	0.154527681801384	1
GO:1902340	BP	negative regulation of chromosome condensation	2	1	0.154634702613795	1
GO:0010990	BP	regulation of SMAD protein complex assembly	6	2	0.15479657287665	1
GO:0014718	BP	positive regulation of satellite cell activation involved in skeletal muscle regeneration	2	1	0.154849239421022	1
GO:0001772	CC	immunological synapse	39	6	0.155158573354651	1
GO:0032048	BP	cardiolipin metabolic process	16	3	0.155159897301577	1
GO:0097132	CC	cyclin D2-CDK6 complex	1	1	0.15517508863478	1
GO:0060700	BP	regulation of ribonuclease activity	9	2	0.155209936142652	1
GO:0050698	MF	proteoglycan sulfotransferase activity	2	1	0.155226766473794	1
GO:0051875	BP	pigment granule localization	24	4	0.155540871106284	1
GO:0032212	BP	positive regulation of telomere maintenance via telomerase	33	5	0.155695463291979	1
GO:0021954	BP	central nervous system neuron development	78	12	0.15577650766988	1
GO:0071678	BP	olfactory bulb axon guidance	1	1	0.155814926771168	1
GO:0030021	MF	extracellular matrix structural constituent conferring compression resistance	19	3	0.155977456455824	1
GO:1904799	BP	regulation of neuron remodeling	1	1	0.156123695333543	1
GO:1904800	BP	negative regulation of neuron remodeling	1	1	0.156123695333543	1
GO:2000173	BP	negative regulation of branching morphogenesis of a nerve	1	1	0.156123695333543	1
GO:0003026	BP	regulation of systemic arterial blood pressure by aortic arch baroreceptor feedback	1	1	0.156241904433728	1
GO:0060816	BP	random inactivation of X chromosome	1	1	0.156315949427787	1
GO:0120092	MF	crotonyl-CoA hydratase activity	1	1	0.156315949427787	1
GO:0120093	BP	regulation of peptidyl-lysine crotonylation	1	1	0.156315949427787	1
GO:0120094	BP	negative regulation of peptidyl-lysine crotonylation	1	1	0.156315949427787	1
GO:0047066	MF	phospholipid-hydroperoxide glutathione peroxidase activity	2	1	0.156414131040063	1
GO:0051290	BP	protein heterotetramerization	15	3	0.156548078283796	1
GO:0030014	CC	CCR4-NOT complex	16	3	0.156593070869373	1
GO:0001844	BP	protein insertion into mitochondrial membrane involved in apoptotic signaling pathway	30	5	0.156695093020101	1
GO:1990031	CC	pinceau fiber	1	1	0.156762890984641	1
GO:0035372	BP	protein localization to microtubule	16	3	0.156827051446654	1
GO:0045109	BP	intermediate filament organization	24	4	0.156899050770744	1
GO:0072382	BP	minus-end-directed vesicle transport along microtubule	1	1	0.15721444974864	1
GO:0051044	BP	positive regulation of membrane protein ectodomain proteolysis	15	3	0.157565687657918	1
GO:0003409	BP	optic cup structural organization	1	1	0.15757904579186	1
GO:0014813	BP	skeletal muscle satellite cell commitment	1	1	0.15782376893794	1
GO:0045887	BP	positive regulation of synaptic growth at neuromuscular junction	1	1	0.157854452908081	1
GO:0071105	BP	response to interleukin-11	1	1	0.157977397427243	1
GO:0071348	BP	cellular response to interleukin-11	1	1	0.157977397427243	1
GO:0021508	BP	floor plate formation	1	1	0.158100676510858	1
GO:0016964	MF	alpha-2 macroglobulin receptor activity	1	1	0.158116109961587	1
GO:0048674	BP	collateral sprouting of injured axon	1	1	0.158116109961587	1
GO:0048693	BP	regulation of collateral sprouting of injured axon	1	1	0.158116109961587	1
GO:0048694	BP	positive regulation of collateral sprouting of injured axon	1	1	0.158116109961587	1
GO:1904109	BP	positive regulation of cholesterol import	1	1	0.158116109961587	1
GO:2000911	BP	positive regulation of sterol import	1	1	0.158116109961587	1
GO:0045003	BP	double-strand break repair via synthesis-dependent strand annealing	9	2	0.158158361595342	1
GO:1904106	BP	protein localization to microvillus	2	1	0.158170495890577	1
GO:1902440	BP	protein localization to mitotic spindle pole body	1	1	0.158208820755726	1
GO:1990811	CC	MWP complex	1	1	0.158208820755726	1
GO:0032475	BP	otolith formation	1	1	0.158224290910802	1
GO:0016402	MF	pristanoyl-CoA oxidase activity	1	1	0.158301720392638	1
GO:0002088	BP	lens development in camera-type eye	80	11	0.158325588318915	1
GO:1905573	MF	ganglioside GM1 binding	2	1	0.158458830173336	1
GO:0007215	BP	glutamate receptor signaling pathway	96	14	0.158522923405502	1
GO:0031328	BP	positive regulation of cellular biosynthetic process	1850	189	0.158635300198405	1
GO:0021813	BP	cell-cell adhesion involved in neuronal-glial interactions involved in cerebral cortex radial glia guided migration	1	1	0.158643970601296	1
GO:0017154	MF	semaphorin receptor activity	10	3	0.158652411026316	1
GO:0035197	MF	siRNA binding	7	2	0.15869540667914	1
GO:0045340	MF	mercury ion binding	2	1	0.15885611819715	1
GO:0048407	MF	platelet-derived growth factor binding	11	3	0.158928582708586	1
GO:0034454	BP	microtubule anchoring at centrosome	9	2	0.158947487054667	1
GO:0045161	BP	neuronal ion channel clustering	12	3	0.158994565780175	1
GO:0022890	MF	inorganic cation transmembrane transporter activity	556	60	0.159044554548512	1
GO:0048712	BP	negative regulation of astrocyte differentiation	15	3	0.159050062295223	1
GO:0060072	MF	large conductance calcium-activated potassium channel activity	1	1	0.159177909273549	1
GO:0070365	BP	hepatocyte differentiation	15	3	0.159298241472527	1
GO:0002032	BP	desensitization of G protein-coupled receptor signaling pathway by arrestin	2	1	0.159406793867668	1
GO:0034329	BP	cell junction assembly	410	50	0.159532022796312	1
GO:0022038	BP	corpus callosum development	20	4	0.159667950679347	1
GO:0030234	MF	enzyme regulator activity	992	98	0.159685719529677	1
GO:1904491	BP	protein localization to ciliary transition zone	8	2	0.159762674891587	1
GO:0031735	MF	CCR10 chemokine receptor binding	3	1	0.159843759439325	1
GO:0070551	MF	endoribonuclease activity	cleaving siRNA-paired mRNA	1	1	0.159909972866907	1
GO:0090625	BP	mRNA cleavage involved in gene silencing by siRNA	1	1	0.159909972866907	1
GO:0060377	BP	negative regulation of mast cell differentiation	1	1	0.159958102546397	1
GO:0002398	BP	MHC class Ib protein complex assembly	1	1	0.16007058941289	1
GO:0050822	BP	peptide stabilization	1	1	0.16007058941289	1
GO:0050823	BP	peptide antigen stabilization	1	1	0.16007058941289	1
GO:0070509	BP	calcium ion import	78	11	0.16012893433791	1
GO:0047191	MF	1-alkylglycerophosphocholine O-acyltransferase activity	1	1	0.160264024633828	1
GO:2001246	BP	negative regulation of phosphatidylcholine biosynthetic process	1	1	0.160264024633828	1
GO:1990535	BP	neuron projection maintenance	9	2	0.160624650526045	1
GO:0046875	MF	ephrin receptor binding	26	5	0.160634561347519	1
GO:0048869	BP	cellular developmental process	4165	405	0.160665208173355	1
GO:0003880	MF	protein C-terminal carboxyl O-methyltransferase activity	2	1	0.160799831045173	1
GO:0006481	BP	C-terminal protein methylation	2	1	0.160799831045173	1
GO:0033026	BP	negative regulation of mast cell apoptotic process	2	1	0.16086501418959	1
GO:0031503	BP	protein-containing complex localization	277	30	0.160987451931306	1
GO:0097090	BP	presynaptic membrane organization	7	2	0.161031205284236	1
GO:0071280	BP	cellular response to copper ion	26	4	0.161229420107149	1
GO:0060876	BP	semicircular canal formation	2	1	0.161331195915635	1
GO:0098839	CC	postsynaptic density membrane	89	13	0.161641399434554	1
GO:0036071	BP	N-glycan fucosylation	2	1	0.161877149219651	1
GO:0010744	BP	positive regulation of macrophage derived foam cell differentiation	19	3	0.161880762322298	1
GO:2000425	BP	regulation of apoptotic cell clearance	10	2	0.161901614198446	1
GO:0000075	BP	cell cycle checkpoint	216	24	0.161912239405318	1
GO:0004081	MF	bis(5'-nucleosyl)-tetraphosphatase (asymmetrical) activity	2	1	0.161970551516768	1
GO:0008796	MF	bis(5'-nucleosyl)-tetraphosphatase activity	2	1	0.161970551516768	1
GO:0032770	BP	positive regulation of monooxygenase activity	29	5	0.162113011344187	1
GO:0046847	BP	filopodium assembly	57	9	0.162163659315793	1
GO:1903311	BP	regulation of mRNA metabolic process	327	35	0.162211826537037	1
GO:1903053	BP	regulation of extracellular matrix organization	43	7	0.162663178312322	1
GO:0098696	BP	regulation of neurotransmitter receptor localization to postsynaptic specialization membrane	7	2	0.163016144017126	1
GO:0036496	BP	regulation of translational initiation by eIF2 alpha dephosphorylation	2	1	0.163016945409874	1
GO:0045838	BP	positive regulation of membrane potential	16	3	0.163117557147245	1
GO:0032240	BP	negative regulation of nucleobase-containing compound transport	3	1	0.163281154291208	1
GO:0002397	BP	MHC class I protein complex assembly	2	1	0.163333986910269	1
GO:0002502	BP	peptide antigen assembly with MHC class I protein complex	2	1	0.163333986910269	1
GO:0034453	BP	microtubule anchoring	24	4	0.164065864963253	1
GO:0071732	BP	cellular response to nitric oxide	15	3	0.164446883944219	1
GO:0045634	BP	regulation of melanocyte differentiation	6	2	0.164455679893831	1
GO:0009070	BP	serine family amino acid biosynthetic process	16	3	0.164579816948755	1
GO:0090102	BP	cochlea development	50	8	0.164646054498729	1
GO:0060291	BP	long-term synaptic potentiation	85	12	0.164819515373392	1
GO:0034587	BP	piRNA metabolic process	18	3	0.164832789826857	1
GO:1903205	BP	regulation of hydrogen peroxide-induced cell death	27	4	0.164903018160381	1
GO:1902914	BP	regulation of protein polyubiquitination	24	4	0.164952743264042	1
GO:0016529	CC	sarcoplasmic reticulum	69	10	0.164952904469525	1
GO:0042983	BP	amyloid precursor protein biosynthetic process	15	3	0.165061270488159	1
GO:0042984	BP	regulation of amyloid precursor protein biosynthetic process	15	3	0.165061270488159	1
GO:0097055	BP	agmatine biosynthetic process	2	1	0.165085513215238	1
GO:0014733	BP	regulation of skeletal muscle adaptation	15	3	0.165532280312404	1
GO:1905663	BP	positive regulation of telomerase RNA reverse transcriptase activity	2	1	0.165582896679342	1
GO:0051098	BP	regulation of binding	356	40	0.165717773674605	1
GO:0014719	BP	skeletal muscle satellite cell activation	7	2	0.165793215027166	1
GO:0045839	BP	negative regulation of mitotic nuclear division	50	7	0.165934525590627	1
GO:0060137	BP	maternal process involved in parturition	7	2	0.165938607838148	1
GO:1905371	BP	ceramide phosphoethanolamine metabolic process	2	1	0.166187559920216	1
GO:1905373	BP	ceramide phosphoethanolamine biosynthetic process	2	1	0.166187559920216	1
GO:0006695	BP	cholesterol biosynthetic process	70	9	0.166436694790702	1
GO:1902653	BP	secondary alcohol biosynthetic process	70	9	0.166436694790702	1
GO:0071241	BP	cellular response to inorganic substance	209	24	0.166456430056421	1
GO:0042119	BP	neutrophil activation	480	46	0.166502118777367	1
GO:0030549	MF	acetylcholine receptor activator activity	2	1	0.166576589992679	1
GO:1904354	BP	negative regulation of telomere capping	8	2	0.166613423296226	1
GO:0008281	MF	sulfonylurea receptor activity	2	1	0.166673739231793	1
GO:0010370	CC	perinucleolar chromocenter	2	1	0.16711973262549	1
GO:0000105	BP	histidine biosynthetic process	2	1	0.167135130319952	1
GO:0032621	BP	interleukin-18 production	12	2	0.16730965116489	1
GO:0033280	BP	response to vitamin D	35	5	0.167464425136347	1
GO:0010997	MF	anaphase-promoting complex binding	8	2	0.167515847713065	1
GO:0005788	CC	endoplasmic reticulum lumen	290	32	0.167560671692931	1
GO:2000553	BP	positive regulation of T-helper 2 cell cytokine production	7	2	0.167596922440278	1
GO:0032963	BP	collagen metabolic process	109	13	0.167599086713737	1
GO:0021560	BP	abducens nerve development	2	1	0.167601231464075	1
GO:0021598	BP	abducens nerve morphogenesis	2	1	0.167601231464075	1
GO:0021599	BP	abducens nerve formation	2	1	0.167601231464075	1
GO:0006975	BP	DNA damage induced protein phosphorylation	8	2	0.167675610628056	1
GO:0005999	BP	xylulose biosynthetic process	2	1	0.168181755380034	1
GO:0042542	BP	response to hydrogen peroxide	140	16	0.168183392031411	1
GO:0003938	MF	IMP dehydrogenase activity	2	1	0.168260525013296	1
GO:0002138	BP	retinoic acid biosynthetic process	8	2	0.168735975249769	1
GO:0018198	BP	peptidyl-cysteine modification	45	6	0.168797831448429	1
GO:0006407	BP	rRNA export from nucleus	2	1	0.168972825633976	1
GO:0036316	BP	SREBP-SCAP complex retention in endoplasmic reticulum	2	1	0.169144457364011	1
GO:2000779	BP	regulation of double-strand break repair	78	10	0.169192996547049	1
GO:1901532	BP	regulation of hematopoietic progenitor cell differentiation	84	11	0.169218895918472	1
GO:0030141	CC	secretory granule	819	76	0.169229585902292	1
GO:0016575	BP	histone deacetylation	72	10	0.169369542819345	1
GO:0003165	BP	Purkinje myocyte development	2	1	0.169369660802694	1
GO:0016757	MF	transferase activity	transferring glycosyl groups	261	27	0.169463332301851	1
GO:1903508	BP	positive regulation of nucleic acid-templated transcription	1520	159	0.16951028566085	1
GO:0048668	BP	collateral sprouting	24	5	0.169536939661345	1
GO:0061000	BP	negative regulation of dendritic spine development	11	3	0.169897715297845	1
GO:0015020	MF	glucuronosyltransferase activity	30	4	0.170138536601617	1
GO:0002283	BP	neutrophil activation involved in immune response	468	45	0.170188996359938	1
GO:0004756	MF	selenide	water dikinase activity	2	1	0.170408439911882	1
GO:0016260	BP	selenocysteine biosynthetic process	2	1	0.170408439911882	1
GO:0016781	MF	phosphotransferase activity	paired acceptors	2	1	0.170408439911882	1
GO:0044861	BP	protein transport into plasma membrane raft	2	1	0.170430798175373	1
GO:0015871	BP	choline transport	7	2	0.170511512187768	1
GO:1901301	BP	regulation of cargo loading into COPII-coated vesicle	2	1	0.170617162648003	1
GO:0033233	BP	regulation of protein sumoylation	23	4	0.170640861709032	1
GO:1902001	BP	fatty acid transmembrane transport	21	4	0.170787173445371	1
GO:0001605	MF	adrenomedullin receptor activity	3	1	0.170842343177963	1
GO:1903143	CC	adrenomedullin receptor complex	3	1	0.170842343177963	1
GO:0072038	BP	mesenchymal stem cell maintenance involved in nephron morphogenesis	6	2	0.170862514345584	1
GO:1902680	BP	positive regulation of RNA biosynthetic process	1521	159	0.171083738121276	1
GO:1902033	BP	regulation of hematopoietic stem cell proliferation	9	2	0.171237080210843	1
GO:0016045	BP	detection of bacterium	17	3	0.171636600888512	1
GO:0007605	BP	sensory perception of sound	147	19	0.171647338774954	1
GO:1902750	BP	negative regulation of cell cycle G2/M phase transition	103	12	0.17167050791175	1
GO:0002446	BP	neutrophil mediated immunity	479	46	0.17172615212677	1
GO:1903031	BP	regulation of microtubule plus-end binding	2	1	0.171848081746822	1
GO:1903033	BP	positive regulation of microtubule plus-end binding	2	1	0.171848081746822	1
GO:0005979	BP	regulation of glycogen biosynthetic process	29	5	0.171870379852468	1
GO:0010962	BP	regulation of glucan biosynthetic process	29	5	0.171870379852468	1
GO:1905268	BP	negative regulation of chromatin organization	60	8	0.171961269265863	1
GO:0032412	BP	regulation of ion transmembrane transporter activity	246	29	0.172017881434891	1
GO:0051899	BP	membrane depolarization	89	12	0.172127259467953	1
GO:0019008	CC	molybdopterin synthase complex	2	1	0.172266360708927	1
GO:0072520	BP	seminiferous tubule development	10	2	0.172273814090264	1
GO:0006868	BP	glutamine transport	8	2	0.172306173830473	1
GO:0031228	CC	intrinsic component of Golgi membrane	60	8	0.172385869540495	1
GO:0019211	MF	phosphatase activator activity	16	3	0.172397797800026	1
GO:0032989	BP	cellular component morphogenesis	765	91	0.172404796591471	1
GO:0060215	BP	primitive hemopoiesis	7	2	0.172471849259451	1
GO:0003941	MF	L-serine ammonia-lyase activity	3	1	0.17255943919115	1
GO:0036128	CC	CatSper complex	10	2	0.172646987663368	1
GO:0097110	MF	scaffold protein binding	56	9	0.172682624300554	1
GO:0060230	MF	lipoprotein lipase activator activity	3	1	0.173130537055193	1
GO:0036505	MF	prosaposin receptor activity	2	1	0.173160890054187	1
GO:0006812	BP	cation transport	1110	113	0.17348672887359	1
GO:0043022	MF	ribosome binding	51	7	0.173643672024659	1
GO:0015250	MF	water channel activity	12	2	0.173759942725069	1
GO:0031402	MF	sodium ion binding	8	2	0.173834781623952	1
GO:0021570	BP	rhombomere 4 development	2	1	0.173918183176844	1
GO:1901076	BP	positive regulation of engulfment of apoptotic cell	2	1	0.173956190745233	1
GO:0097332	BP	response to antipsychotic drug	2	1	0.174091538991573	1
GO:0072562	CC	blood microparticle	112	11	0.174143867498251	1
GO:0042790	BP	nucleolar large rRNA transcription by RNA polymerase I	17	3	0.174184008803947	1
GO:0036477	CC	somatodendritic compartment	818	91	0.174212141030604	1
GO:0045947	BP	negative regulation of translational initiation	17	3	0.174401488938877	1
GO:1901143	BP	insulin catabolic process	3	1	0.174590445198769	1
GO:0031994	MF	insulin-like growth factor I binding	13	3	0.174656907838374	1
GO:0019748	BP	secondary metabolic process	55	7	0.174678060989695	1
GO:0031646	BP	positive regulation of nervous system process	64	10	0.174767571443488	1
GO:0070200	BP	establishment of protein localization to telomere	17	3	0.174973793923591	1
GO:1990138	BP	neuron projection extension	162	22	0.175017691379624	1
GO:1902514	BP	regulation of calcium ion transmembrane transport via high voltage-gated calcium channel	15	3	0.175108284050818	1
GO:0001975	BP	response to amphetamine	32	5	0.175119922559692	1
GO:0006446	BP	regulation of translational initiation	72	9	0.175194257146888	1
GO:0042383	CC	sarcolemma	133	18	0.175322929544598	1
GO:0070561	BP	vitamin D receptor signaling pathway	9	2	0.175551094334441	1
GO:0008623	CC	CHRAC	3	1	0.175675446438331	1
GO:0090290	BP	positive regulation of osteoclast proliferation	3	1	0.175716317642695	1
GO:0042883	BP	cysteine transport	2	1	0.175944768844101	1
GO:0042985	BP	negative regulation of amyloid precursor protein biosynthetic process	8	2	0.175984274587172	1
GO:0051928	BP	positive regulation of calcium ion transport	117	14	0.176157167759717	1
GO:0060216	BP	definitive hemopoiesis	20	4	0.176372969751522	1
GO:1901624	BP	negative regulation of lymphocyte chemotaxis	3	1	0.176376732131394	1
GO:0042589	CC	zymogen granule membrane	11	2	0.176393048438286	1
GO:0048856	BP	anatomical structure development	5756	551	0.176606217196911	1
GO:0019221	BP	cytokine-mediated signaling pathway	757	70	0.176792480005764	1
GO:0090576	CC	RNA polymerase III transcription regulator complex	9	2	0.176940310898901	1
GO:0033695	MF	oxidoreductase activity	acting on CH or CH2 groups	quinone or similar compound as acceptor	4	1	0.17699468369265	1
GO:0034875	MF	caffeine oxidase activity	4	1	0.17699468369265	1
GO:0009595	BP	detection of biotic stimulus	35	5	0.177102885444132	1
GO:0042168	BP	heme metabolic process	30	4	0.177196666131295	1
GO:1900208	BP	regulation of cardiolipin metabolic process	3	1	0.177329758559249	1
GO:0045830	BP	positive regulation of isotype switching	27	4	0.17739964905721	1
GO:0070008	MF	serine-type exopeptidase activity	10	2	0.177539279064531	1
GO:0050806	BP	positive regulation of synaptic transmission	169	22	0.178126137495692	1
GO:0045187	BP	regulation of circadian sleep/wake cycle	sleep	18	3	0.178131443138059	1
GO:0048030	MF	disaccharide binding	3	1	0.178133820284339	1
GO:0000228	CC	nuclear chromosome	1451	145	0.178191781977827	1
GO:0050942	BP	positive regulation of pigment cell differentiation	7	2	0.17829901290848	1
GO:0006665	BP	sphingolipid metabolic process	158	18	0.178367452473121	1
GO:0071635	BP	negative regulation of transforming growth factor beta production	8	2	0.178962775299744	1
GO:0002046	MF	opsin binding	3	1	0.17911852117174	1
GO:0006784	BP	heme A biosynthetic process	2	1	0.179142064839767	1
GO:0046160	BP	heme a metabolic process	2	1	0.179142064839767	1
GO:0008360	BP	regulation of cell shape	150	19	0.179248076261014	1
GO:0021546	BP	rhombomere development	7	2	0.179285321918541	1
GO:0008392	MF	arachidonic acid epoxygenase activity	14	2	0.179704095489676	1
GO:1904569	BP	regulation of selenocysteine incorporation	2	1	0.179738681241718	1
GO:2000045	BP	regulation of G1/S transition of mitotic cell cycle	177	19	0.180286643980377	1
GO:0006403	BP	RNA localization	220	23	0.180295768011213	1
GO:0000077	BP	DNA damage checkpoint	148	17	0.180570422798283	1
GO:1905863	BP	invadopodium organization	2	1	0.180582680888421	1
GO:0043420	BP	anthranilate metabolic process	3	1	0.180770423158332	1
GO:0071695	BP	anatomical structure maturation	228	26	0.180823082774792	1
GO:1990573	BP	potassium ion import across plasma membrane	46	7	0.180855638922919	1
GO:0004368	MF	glycerol-3-phosphate dehydrogenase (quinone) activity	2	1	0.180913112849299	1
GO:0006127	BP	glycerophosphate shuttle	2	1	0.180913112849299	1
GO:0016901	MF	oxidoreductase activity	acting on the CH-OH group of donors	quinone or similar compound as acceptor	2	1	0.180913112849299	1
GO:0008266	MF	poly(U) RNA binding	24	4	0.180959654762641	1
GO:0050220	MF	prostaglandin-E synthase activity	3	1	0.181084031660486	1
GO:0030911	MF	TPR domain binding	8	2	0.181089115384524	1
GO:0021814	BP	cell motility involved in cerebral cortex radial glia guided migration	7	2	0.181140725540418	1
GO:0042978	MF	ornithine decarboxylase activator activity	2	1	0.181200118444795	1
GO:1902269	BP	positive regulation of polyamine transmembrane transport	2	1	0.181200118444795	1
GO:0019371	BP	cyclooxygenase pathway	11	2	0.181207285779396	1
GO:0150093	BP	amyloid-beta clearance by transcytosis	7	2	0.181457125620982	1
GO:0001730	MF	2'-5'-oligoadenylate synthetase activity	3	1	0.181595416414272	1
GO:0099509	BP	regulation of presynaptic cytosolic calcium ion concentration	15	3	0.182087358236819	1
GO:0048588	BP	developmental cell growth	221	28	0.18210939829162	1
GO:0031702	MF	type 1 angiotensin receptor binding	7	2	0.182202724607468	1
GO:0060073	BP	micturition	7	2	0.182287850415357	1
GO:0043353	BP	enucleate erythrocyte differentiation	8	2	0.182296350320056	1
GO:0032802	BP	low-density lipoprotein particle receptor catabolic process	14	3	0.182351341003471	1
GO:0006449	BP	regulation of translational termination	11	2	0.182535706747572	1
GO:0032885	BP	regulation of polysaccharide biosynthetic process	37	6	0.182624633689852	1
GO:0005154	MF	epidermal growth factor receptor binding	34	5	0.182957474251479	1
GO:1903433	BP	regulation of constitutive secretory pathway	2	1	0.182977451459202	1
GO:0031213	CC	RSF complex	2	1	0.183007998872391	1
GO:0099103	MF	channel activator activity	3	1	0.183245477144571	1
GO:0099104	MF	potassium channel activator activity	3	1	0.183245477144571	1
GO:0016185	BP	synaptic vesicle budding from presynaptic endocytic zone membrane	8	2	0.183332528827911	1
GO:0010650	BP	positive regulation of cell communication by electrical coupling	2	1	0.183382797098392	1
GO:0016409	MF	palmitoyltransferase activity	36	5	0.183456430921613	1
GO:2000309	BP	positive regulation of tumor necrosis factor (ligand) superfamily member 11 production	2	1	0.183508408606049	1
GO:0042361	BP	menaquinone catabolic process	4	1	0.183521746605137	1
GO:0042377	BP	vitamin K catabolic process	4	1	0.183521746605137	1
GO:0006547	BP	histidine metabolic process	10	2	0.183559479949084	1
GO:0000797	CC	condensin core heterodimer	3	1	0.183739602069259	1
GO:0032226	BP	positive regulation of synaptic transmission	dopaminergic	7	2	0.183916110830378	1
GO:0005923	CC	bicellular tight junction	112	14	0.184441128872586	1
GO:1905608	BP	positive regulation of presynapse assembly	2	1	0.184444093716803	1
GO:0051236	BP	establishment of RNA localization	188	20	0.184446761796562	1
GO:1902285	BP	semaphorin-plexin signaling pathway involved in neuron projection guidance	11	3	0.184473991192655	1
GO:0021860	BP	pyramidal neuron development	7	2	0.184501758712859	1
GO:0034351	BP	negative regulation of glial cell apoptotic process	7	2	0.184623320132448	1
GO:1905956	BP	positive regulation of endothelial tube morphogenesis	2	1	0.184639530409359	1
GO:0071065	CC	alpha9-beta1 integrin-vascular cell adhesion molecule-1 complex	2	1	0.184762711794481	1
GO:0009097	BP	isoleucine biosynthetic process	3	1	0.185022549746207	1
GO:0008427	MF	calcium-dependent protein kinase inhibitor activity	3	1	0.185130524255504	1
GO:0010858	MF	calcium-dependent protein kinase regulator activity	3	1	0.185130524255504	1
GO:0060079	BP	excitatory postsynaptic potential	99	14	0.185154635540047	1
GO:1990402	BP	embryonic liver development	2	1	0.185197693821832	1
GO:0070578	CC	RISC-loading complex	9	2	0.185442077144433	1
GO:0048817	BP	negative regulation of hair follicle maturation	2	1	0.185469998642219	1
GO:0097546	CC	ciliary base	34	5	0.185586865350156	1
GO:0097199	MF	cysteine-type endopeptidase activity involved in apoptotic signaling pathway	10	2	0.185603018289794	1
GO:0045786	BP	negative regulation of cell cycle	613	61	0.185893858585978	1
GO:0036230	BP	granulocyte activation	487	46	0.185998081626963	1
GO:0003335	BP	corneocyte development	3	1	0.186037359910226	1
GO:0036359	BP	renal potassium excretion	2	1	0.186132537828607	1
GO:0007566	BP	embryo implantation	53	7	0.186431033411489	1
GO:0004307	MF	ethanolaminephosphotransferase activity	3	1	0.186607227159738	1
GO:0098749	BP	cerebellar neuron development	3	1	0.186695918639596	1
GO:0015056	MF	corticotrophin-releasing factor receptor activity	2	1	0.186729801623218	1
GO:0043404	MF	corticotropin-releasing hormone receptor activity	2	1	0.186729801623218	1
GO:1900006	BP	positive regulation of dendrite development	66	10	0.187027289327731	1
GO:0006941	BP	striated muscle contraction	167	20	0.187072276497659	1
GO:0003727	MF	single-stranded RNA binding	81	10	0.187169083734563	1
GO:0048512	BP	circadian behavior	49	7	0.187238899635658	1
GO:0001514	BP	selenocysteine incorporation	9	2	0.187239001867311	1
GO:0006451	BP	translational readthrough	9	2	0.187239001867311	1
GO:0071715	BP	icosanoid transport	49	6	0.18727810632436	1
GO:1901571	BP	fatty acid derivative transport	49	6	0.18727810632436	1
GO:0015087	MF	cobalt ion transmembrane transporter activity	2	1	0.187357631488771	1
GO:0003858	MF	3-hydroxybutyrate dehydrogenase activity	2	1	0.187534379174874	1
GO:0008542	BP	visual learning	45	7	0.187870373319343	1
GO:0035902	BP	response to immobilization stress	24	4	0.187889578808803	1
GO:0051128	BP	regulation of cellular component organization	2307	233	0.187906909671263	1
GO:0010124	BP	phenylacetate catabolic process	2	1	0.188158791332178	1
GO:0051726	BP	regulation of cell cycle	1165	113	0.18833360127505	1
GO:0043011	BP	myeloid dendritic cell differentiation	18	3	0.188426281567287	1
GO:0007094	BP	mitotic spindle assembly checkpoint	34	5	0.188539418409345	1
GO:0031577	BP	spindle checkpoint	34	5	0.188539418409345	1
GO:0071173	BP	spindle assembly checkpoint	34	5	0.188539418409345	1
GO:0071174	BP	mitotic spindle checkpoint	34	5	0.188539418409345	1
GO:0031691	MF	alpha-1A adrenergic receptor binding	2	1	0.188586798833611	1
GO:0031762	MF	follicle-stimulating hormone receptor binding	2	1	0.188586798833611	1
GO:0010520	BP	regulation of reciprocal meiotic recombination	3	1	0.188591211240054	1
GO:0010845	BP	positive regulation of reciprocal meiotic recombination	3	1	0.188591211240054	1
GO:0045123	BP	cellular extravasation	64	8	0.188648501955177	1
GO:2000651	BP	positive regulation of sodium ion transmembrane transporter activity	14	3	0.188742072872158	1
GO:0045210	BP	FasL biosynthetic process	2	1	0.188775603685773	1
GO:0048840	BP	otolith development	8	2	0.188813067584072	1
GO:0003422	BP	growth plate cartilage morphogenesis	2	1	0.188817559011121	1
GO:0072181	BP	mesonephric duct formation	2	1	0.18883425949694	1
GO:0016581	CC	NuRD complex	14	3	0.189127696211862	1
GO:0090545	CC	CHD-type complex	14	3	0.189127696211862	1
GO:0071072	BP	negative regulation of phospholipid biosynthetic process	7	2	0.189656557349074	1
GO:0035115	BP	embryonic forelimb morphogenesis	33	6	0.189886162959317	1
GO:0001736	BP	establishment of planar polarity	119	15	0.189973390896105	1
GO:0007164	BP	establishment of tissue polarity	119	15	0.189973390896105	1
GO:0010676	BP	positive regulation of cellular carbohydrate metabolic process	60	8	0.190467477284985	1
GO:0015077	MF	monovalent inorganic cation transmembrane transporter activity	359	39	0.1905874443324	1
GO:0030198	BP	extracellular matrix organization	380	44	0.190690120705071	1
GO:0032482	BP	Rab protein signal transduction	16	3	0.190780835672522	1
GO:0005811	CC	lipid droplet	85	10	0.190785208591618	1
GO:1903860	BP	negative regulation of dendrite extension	2	1	0.191049408265501	1
[truncated: 20,612 more rows]
