# Supplementary material for: Large-scale placenta DNA methylation integrated analysis reveals fetal sex-specific differentially methylated CpG sites and regions
Source: Sci Rep. 2022 Jun 7;12:9396. doi: 10.1038/s41598-022-13544-z (PMC9174475; doi:10.1038/s41598-022-13544-z)
Supplement: Supplementary file 7 — Supplementary Information 7. [file 41598_2022_13544_MOESM7_ESM.csv]

GO_ID	ONTOLOGY	TERM	N	DE	P.DE	FDR
GO:0030216	BP	keratinocyte differentiation	290	30	4.20564625501285e-10	5.27010120453113e-06
GO:0031424	BP	keratinization	210	23	4.66153748576457e-10	5.27010120453113e-06
GO:0009913	BP	epidermal cell differentiation	347	34	1.56029370900336e-09	1.17599336847583e-05
GO:0008009	MF	chemokine activity	49	10	8.09166058393022e-08	0.000457401343658115
GO:0043588	BP	skin development	406	36	1.09106573066841e-07	0.00049340174472287
GO:0048020	MF	CCR chemokine receptor binding	41	9	2.38535952298335e-07	0.000898922736236275
GO:0071674	BP	mononuclear cell migration	95	15	3.00499641296314e-07	0.00097065676990728
GO:0002548	BP	monocyte chemotaxis	65	12	4.46493964823019e-07	0.00112036226440928
GO:0070268	BP	cornification	112	15	4.7172368252161e-07	0.00112036226440928
GO:0008544	BP	epidermis development	453	37	4.95494345411208e-07	0.00112036226440928
GO:0042379	MF	chemokine receptor binding	64	10	1.8581703885849e-06	0.00381955369602665
GO:0060429	BP	epithelium development	1272	85	3.39629041428824e-06	0.00639946021312261
GO:0070098	BP	chemokine-mediated signaling pathway	85	12	5.77915514866749e-06	0.010051729005117
GO:0072676	BP	lymphocyte migration	108	14	9.65779020522675e-06	0.0155980210235987
GO:0048513	BP	animal organ development	3480	190	1.46928837092873e-05	0.0221480529033797
GO:0004867	MF	serine-type endopeptidase inhibitor activity	91	12	2.49113585695128e-05	0.0352044205384533
GO:1990868	BP	response to chemokine	94	12	2.99551928520383e-05	0.0376287147543021
GO:1990869	BP	cellular response to chemokine	94	12	2.99551928520383e-05	0.0376287147543021
GO:0048247	BP	lymphocyte chemotaxis	61	9	3.63843303717738e-05	0.0432992681071672
GO:0043547	BP	positive regulation of GTPase activity	377	34	4.32621793071079e-05	0.0489100568156508
GO:0010604	BP	positive regulation of macromolecule metabolic process	3361	179	6.02491582449473e-05	0.0648711293845954
GO:0009893	BP	positive regulation of metabolic process	3645	191	7.41860917193913e-05	0.0762464418121435
GO:0045095	CC	keratin filament	83	9	9.22887477413517e-05	0.0902071941385943
GO:0048245	BP	eosinophil chemotaxis	19	5	9.78880744105533e-05	0.0902071941385943
GO:0048731	BP	system development	4760	243	9.97381740508981e-05	0.0902071941385943
GO:0007275	BP	multicellular organism development	5295	264	0.000108971973963241	0.0947678962801092
GO:0071621	BP	granulocyte chemotaxis	122	13	0.000171472751193808	0.143598902860859
GO:0061135	MF	endopeptidase regulator activity	178	16	0.000186450109804555	0.150565122599671
GO:0001501	BP	skeletal system development	499	42	0.000219868308842133	0.171429045904465
GO:0097530	BP	granulocyte migration	142	14	0.000240528044587512	0.181285987205608
GO:0048856	BP	anatomical structure development	5756	280	0.000252707238698685	0.184171962155135
GO:0098772	MF	molecular function regulator	3493	177	0.000260647595814617	0.184171962155135
GO:0030855	BP	epithelial cell differentiation	758	48	0.000289762234841203	0.195852797559067
GO:0004866	MF	endopeptidase inhibitor activity	169	15	0.000294502459732354	0.195852797559067
GO:0043087	BP	regulation of GTPase activity	446	36	0.000370474778750017	0.23933729206619
GO:0030414	MF	peptidase inhibitor activity	174	15	0.000421708965135173	0.260684868860972
GO:0030154	BP	cell differentiation	4091	208	0.000426577336157443	0.260684868860972
GO:0072677	BP	eosinophil migration	23	5	0.000452842092107735	0.269356069405045
GO:0070555	BP	response to interleukin-1	201	17	0.000464591867091095	0.269356069405045
GO:0001228	MF	DNA-binding transcription activator activity	RNA polymerase II-specific	492	39	0.000488604697754974	0.276196020523443
GO:0001216	MF	DNA-binding transcription activator activity	495	39	0.000528419225229459	0.291416758577154
GO:0061134	MF	peptidase regulator activity	213	17	0.000668035375962867	0.359641616330866
GO:0009952	BP	anterior/posterior pattern specification	209	22	0.000712081555571098	0.371596193730986
GO:0048869	BP	cellular developmental process	4165	209	0.000723109660084179	0.371596193730986
GO:0071347	BP	cellular response to interleukin-1	176	15	0.000780057301876447	0.391952792282852
GO:0031325	BP	positive regulation of cellular metabolic process	3194	165	0.000971933792563609	0.473149695873966
GO:0032502	BP	developmental process	6214	292	0.000991942072128574	0.473149695873966
GO:0007008	BP	outer mitochondrial membrane organization	7	3	0.00100443082579056	0.473149695873966
GO:0050855	BP	regulation of B cell receptor signaling pathway	29	6	0.00109976973310904	0.507487621129155
GO:0007423	BP	sensory organ development	565	43	0.00112958246774459	0.510819783563458
GO:0097529	BP	myeloid leukocyte migration	213	17	0.00116188685966753	0.515125956547892
GO:0006955	BP	immune response	1883	91	0.00127612488682811	0.554893458001355
GO:0001664	MF	G protein-coupled receptor binding	279	21	0.00133493591864292	0.569513887857264
GO:0002009	BP	morphogenesis of an epithelium	536	41	0.00136340844465128	0.570889413740926
GO:0009888	BP	tissue development	2007	110	0.00149429385973282	0.614317790225795
GO:0030234	MF	enzyme regulator activity	992	58	0.0015615089974713	0.630487141818278
GO:0051173	BP	positive regulation of nitrogen compound metabolic process	3011	155	0.00165108396207953	0.654958938010181
GO:0001503	BP	ossification	395	31	0.00168942110329461	0.658612078734386
GO:0051336	BP	regulation of hydrolase activity	1233	70	0.00174869944503036	0.670166833077653
GO:0051345	BP	positive regulation of hydrolase activity	737	47	0.0017805494185818	0.671000048392551
GO:0071675	BP	regulation of mononuclear cell migration	49	7	0.00184766868762195	0.678558199449723
GO:0034341	BP	response to interferon-gamma	193	16	0.0018606257293301	0.678558199449723
GO:0030595	BP	leukocyte chemotaxis	222	17	0.00190222571225061	0.68271786634442
GO:0046469	BP	platelet activating factor metabolic process	8	3	0.00199094133611631	0.703393352358218
GO:0031077	BP	post-embryonic camera-type eye development	7	3	0.00205227059922743	0.713906007986638
GO:0035684	BP	helper T cell extravasation	3	2	0.00225154847010007	0.747908352157146
GO:0048562	BP	embryonic organ morphogenesis	296	27	0.00225324121746844	0.747908352157146
GO:0072683	BP	T cell extravasation	10	3	0.00227225973274727	0.747908352157146
GO:0060562	BP	epithelial tube morphogenesis	321	28	0.00228232613766941	0.747908352157146
GO:0010951	BP	negative regulation of endopeptidase activity	236	17	0.00251174806554157	0.80571118563226
GO:0048729	BP	tissue morphogenesis	644	46	0.002529985147932	0.80571118563226
GO:0005335	MF	serotonin:sodium symporter activity	3	2	0.00265462958003182	0.811344443297468
GO:0051665	BP	membrane raft localization	8	3	0.00267083790135694	0.811344443297468
GO:0061912	BP	selective autophagy	59	8	0.00267380053473844	0.811344443297468
GO:0048732	BP	gland development	429	33	0.0026935419392249	0.811344443297468
GO:0060326	BP	cell chemotaxis	290	21	0.00272708759854087	0.811344443297468
GO:0048705	BP	skeletal system morphogenesis	225	22	0.00281194482116906	0.825725770798099
GO:2000810	BP	regulation of bicellular tight junction assembly	23	5	0.00287341981870154	0.828856045902302
GO:0051219	MF	phosphoprotein binding	81	10	0.00289606235932193	0.828856045902302
GO:0009891	BP	positive regulation of biosynthetic process	1882	103	0.00293867969243232	0.828856045902302
GO:0060255	BP	regulation of macromolecule metabolic process	6370	276	0.00296923354641929	0.828856045902302
GO:0048523	BP	negative regulation of cellular process	4780	225	0.0030930714913029	0.841387610550609
GO:0047159	MF	1-alkenylglycerophosphocholine O-acyltransferase activity	2	2	0.00314758684458232	0.841387610550609
GO:0050200	MF	plasmalogen synthase activity	2	2	0.00314758684458232	0.841387610550609
GO:0010557	BP	positive regulation of macromolecule biosynthetic process	1743	97	0.00316297142527097	0.841387610550609
GO:0090647	BP	modulation of age-related behavioral decline	9	3	0.00326188631115823	0.85761059746045
GO:1902742	BP	apoptotic process involved in development	39	7	0.00339803449087752	0.883137446818755
GO:0002076	BP	osteoblast development	19	5	0.00385057720682702	0.989379559358701
GO:1990266	BP	neutrophil migration	115	10	0.00399804496490798	1
GO:0050854	BP	regulation of antigen receptor-mediated signaling pathway	67	8	0.00406628133920293	1
GO:0010466	BP	negative regulation of peptidase activity	249	17	0.00413175072204287	1
GO:0050853	BP	B cell receptor signaling pathway	60	8	0.00420065958081721	1
GO:0030593	BP	neutrophil chemotaxis	99	9	0.00429756200123376	1
GO:0071867	BP	response to monoamine	106	11	0.00436464224366556	1
GO:0071869	BP	response to catecholamine	106	11	0.00436464224366556	1
GO:0048598	BP	embryonic morphogenesis	587	43	0.00465859909334939	1
GO:0043009	BP	chordate embryonic development	622	43	0.00489563974424922	1
GO:0019221	BP	cytokine-mediated signaling pathway	757	41	0.00498129914503604	1
GO:0071346	BP	cellular response to interferon-gamma	174	14	0.00512873351802169	1
GO:0046470	BP	phosphatidylcholine metabolic process	86	9	0.00532045139200037	1
GO:0015960	BP	diadenosine polyphosphate biosynthetic process	3	2	0.00532420426543689	1
GO:0015965	BP	diadenosine tetraphosphate metabolic process	3	2	0.00532420426543689	1
GO:0015966	BP	diadenosine tetraphosphate biosynthetic process	3	2	0.00532420426543689	1
GO:0030878	BP	thyroid gland development	21	5	0.00538310553120887	1
GO:0045944	BP	positive regulation of transcription by RNA polymerase II	1143	69	0.00539914145411858	1
GO:0048568	BP	embryonic organ development	438	34	0.00540403979827675	1
GO:0039019	BP	pronephric nephron development	3	2	0.00547890736309209	1
GO:0006656	BP	phosphatidylcholine biosynthetic process	38	6	0.00556149051376805	1
GO:0090385	BP	phagosome-lysosome fusion	9	3	0.0055851261747122	1
GO:0050900	BP	leukocyte migration	440	27	0.00561008509693659	1
GO:0009790	BP	embryo development	1027	65	0.00565650161698563	1
GO:0060560	BP	developmental growth involved in morphogenesis	222	21	0.00577644631051427	1
GO:1903508	BP	positive regulation of nucleic acid-templated transcription	1520	86	0.00581177679826348	1
GO:0043085	BP	positive regulation of catalytic activity	1401	77	0.00581283817187953	1
GO:1902680	BP	positive regulation of RNA biosynthetic process	1521	86	0.00587765920249197	1
GO:0005126	MF	cytokine receptor binding	245	16	0.00616063245446861	1
GO:0047192	MF	1-alkylglycerophosphocholine O-acetyltransferase activity	3	2	0.00617737697694444	1
GO:0001533	CC	cornified envelope	44	5	0.00650170347357137	1
GO:0000981	MF	DNA-binding transcription factor activity	RNA polymerase II-specific	1357	75	0.00653971022647976	1
GO:0006878	BP	cellular copper ion homeostasis	12	3	0.00654928183906757	1
GO:0060764	BP	cell-cell signaling involved in mammary gland development	2	2	0.00659570732199128	1
GO:0034584	MF	piRNA binding	4	2	0.00660520216995912	1
GO:0006663	BP	platelet activating factor biosynthetic process	5	2	0.00677122292738289	1
GO:0051171	BP	regulation of nitrogen compound metabolic process	5533	247	0.00679989396545367	1
GO:0035973	BP	aggrephagy	9	3	0.0068516731755251	1
GO:0034666	CC	integrin alpha2-beta1 complex	3	2	0.00696073745631187	1
GO:0042060	BP	wound healing	506	34	0.00696515217022177	1
GO:0045309	MF	protein phosphorylated amino acid binding	53	7	0.00697737380983744	1
GO:0006909	BP	phagocytosis	268	20	0.00709272934889687	1
GO:0009792	BP	embryo development ending in birth or egg hatching	638	43	0.00724296949260162	1
GO:0031328	BP	positive regulation of cellular biosynthetic process	1850	99	0.00730472181517006	1
GO:0045935	BP	positive regulation of nucleobase-containing compound metabolic process	1766	96	0.00733420457808449	1
GO:0031323	BP	regulation of cellular metabolic process	5919	262	0.00779101591349826	1
GO:0045893	BP	positive regulation of transcription	DNA-templated	1451	82	0.00779654349203946	1
GO:0051056	BP	regulation of small GTPase mediated signal transduction	298	24	0.00832022318257677	1
GO:0009620	BP	response to fungus	51	5	0.00837661978233825	1
GO:0016579	BP	protein deubiquitination	243	17	0.00838723183832537	1
GO:0090170	BP	regulation of Golgi inheritance	4	2	0.00842826604591865	1
GO:0007156	BP	homophilic cell adhesion via plasma membrane adhesion molecules	160	14	0.00863912992808064	1
GO:0009887	BP	animal organ morphogenesis	1055	66	0.00865588547421819	1
GO:0097110	MF	scaffold protein binding	56	8	0.00872244200276929	1
GO:0032000	BP	positive regulation of fatty acid beta-oxidation	9	3	0.00887538277302169	1
GO:0045725	BP	positive regulation of glycogen biosynthetic process	16	4	0.00892232001072695	1
GO:0071871	BP	response to epinephrine	16	4	0.00896353917084865	1
GO:0090025	BP	regulation of monocyte chemotaxis	24	4	0.00901214262631191	1
GO:0071868	BP	cellular response to monoamine stimulus	102	10	0.00912860189025993	1
GO:0071870	BP	cellular response to catecholamine stimulus	102	10	0.00912860189025993	1
GO:0006935	BP	chemotaxis	624	41	0.00922489903084483	1
GO:0003162	BP	atrioventricular node development	3	2	0.00929650133445629	1
GO:0042330	BP	taxis	626	41	0.00952774266873267	1
GO:0071936	MF	coreceptor activity involved in Wnt signaling pathway	8	3	0.00953293041251936	1
GO:1904062	BP	regulation of cation transmembrane transport	327	24	0.00964094639450814	1
GO:0055070	BP	copper ion homeostasis	14	3	0.00980554513771113	1
GO:0042470	CC	melanosome	103	10	0.00995071365467074	1
GO:0048770	CC	pigment granule	103	10	0.00995071365467074	1
GO:0050861	BP	positive regulation of B cell receptor signaling pathway	10	3	0.0100111965492311	1
GO:0060561	BP	apoptotic process involved in morphogenesis	26	5	0.0100608985014449	1
GO:0070875	BP	positive regulation of glycogen metabolic process	17	4	0.0101113471656461	1
GO:0047184	MF	1-acylglycerophosphocholine O-acyltransferase activity	4	2	0.010251709410278	1
GO:0044403	BP	symbiotic process	936	49	0.0102741207841313	1
GO:0045040	BP	protein insertion into mitochondrial outer membrane	5	2	0.0103094079794743	1
GO:0016032	BP	viral process	882	47	0.0103742768794472	1
GO:0048706	BP	embryonic skeletal system development	128	14	0.0107383258463578	1
GO:0043583	BP	ear development	221	19	0.0107882772636676	1
GO:0048156	MF	tau protein binding	44	6	0.0108533304846238	1
GO:0021932	BP	hindbrain radial glia guided cell migration	9	3	0.0109152391893277	1
GO:0032501	BP	multicellular organismal process	7389	317	0.0109173709918981	1
GO:0004857	MF	enzyme inhibitor activity	362	22	0.0110687818017911	1
GO:0051254	BP	positive regulation of RNA metabolic process	1609	88	0.0110702395713757	1
GO:0001784	MF	phosphotyrosine residue binding	42	6	0.0111312546224706	1
GO:0044093	BP	positive regulation of molecular function	1735	91	0.0112298762520887	1
GO:0080090	BP	regulation of primary metabolic process	5718	252	0.0114214547882002	1
GO:0001766	BP	membrane raft polarization	4	2	0.0114658663839178	1
GO:0060715	BP	syncytiotrophoblast cell differentiation involved in labyrinthine layer development	3	2	0.0115233122461264	1
GO:0050790	BP	regulation of catalytic activity	2270	112	0.0115545355082275	1
GO:0003273	BP	cell migration involved in endocardial cushion formation	4	2	0.0117970090139864	1
GO:0010628	BP	positive regulation of gene expression	2180	111	0.01197211301731	1
GO:0023051	BP	regulation of signaling	3465	169	0.0124068128061275	1
GO:0098966	CC	perisynaptic extracellular matrix	4	2	0.0127655497402601	1
GO:0099535	CC	synapse-associated extracellular matrix	4	2	0.0127655497402601	1
GO:0048246	BP	macrophage chemotaxis	42	5	0.0129918170046502	1
GO:1905517	BP	macrophage migration	57	6	0.0130416012252932	1
GO:0010646	BP	regulation of cell communication	3427	167	0.0130848006372683	1
GO:0035564	BP	regulation of kidney size	4	2	0.013196388248784	1
GO:0000987	MF	cis-regulatory region sequence-specific DNA binding	1060	59	0.0133658643464724	1
GO:0060061	BP	Spemann organizer formation	4	2	0.0135735959179952	1
GO:0070646	BP	protein modification by small protein removal	260	17	0.0137636639986592	1
GO:0070142	BP	synaptic vesicle budding	11	3	0.0138119884965864	1
GO:0016573	BP	histone acetylation	146	12	0.0139034165534787	1
GO:0009611	BP	response to wounding	622	39	0.0141850534877678	1
GO:0001649	BP	osteoblast differentiation	224	18	0.0143181416238919	1
GO:0036151	BP	phosphatidylcholine acyl-chain remodeling	29	4	0.0143456884709933	1
GO:0060348	BP	bone development	195	17	0.0144900305540327	1
GO:0019222	BP	regulation of metabolic process	6881	289	0.0146396885656995	1
GO:0065009	BP	regulation of molecular function	2897	139	0.0148328425460268	1
GO:0044419	BP	interspecies interaction between organisms	1987	89	0.0149807850621182	1
GO:0003700	MF	DNA-binding transcription factor activity	1414	75	0.0150151423825568	1
GO:0007440	BP	foregut morphogenesis	10	3	0.015260081822822	1
GO:0006873	BP	cellular ion homeostasis	636	36	0.0152853515887423	1
GO:0070374	BP	positive regulation of ERK1 and ERK2 cascade	207	15	0.0153595632969967	1
GO:0001845	BP	phagolysosome assembly	13	3	0.0155683662821987	1
GO:0019904	MF	protein domain specific binding	671	42	0.0156780181986462	1
GO:0003159	BP	morphogenesis of an endothelium	19	4	0.0163252404498881	1
GO:0061154	BP	endothelial tube morphogenesis	19	4	0.0163252404498881	1
GO:0044154	BP	histone H3-K14 acetylation	13	3	0.017003265712776	1
GO:0036148	BP	phosphatidylglycerol acyl-chain remodeling	18	3	0.0170250612550826	1
GO:0071440	BP	regulation of histone H3-K14 acetylation	5	2	0.0174772948220644	1
GO:0099544	CC	perisynaptic space	5	2	0.0174918815596634	1
GO:0061564	BP	axon development	502	37	0.0177128482045538	1
GO:0048704	BP	embryonic skeletal system morphogenesis	96	11	0.0177974221694566	1
GO:0044264	BP	cellular polysaccharide metabolic process	96	9	0.017925321847889	1
GO:0050857	BP	positive regulation of antigen receptor-mediated signaling pathway	25	4	0.0180850681093762	1
GO:0010758	BP	regulation of macrophage chemotaxis	30	4	0.0182915624809362	1
GO:0030003	BP	cellular cation homeostasis	623	35	0.0182924722293345	1
GO:0051707	BP	response to other organism	1364	62	0.0184070884714022	1
GO:0090571	CC	RNA polymerase II transcription repressor complex	6	2	0.0184428085280616	1
GO:0060439	BP	trachea morphogenesis	11	3	0.0185352529357205	1
GO:0003002	BP	regionalization	343	26	0.0185650097989126	1
GO:0005125	MF	cytokine activity	218	13	0.0185971246324778	1
GO:0043207	BP	response to external biotic stimulus	1365	62	0.0186438050710637	1
GO:0060039	BP	pericardium development	20	4	0.0186769873771114	1
GO:0048519	BP	negative regulation of biological process	5576	242	0.0186870172322546	1
GO:0031175	BP	neuron projection development	956	61	0.0186893565446549	1
GO:0000977	MF	RNA polymerase II transcription regulatory region sequence-specific DNA binding	1284	68	0.0187521891551075	1
GO:0060268	BP	negative regulation of respiratory burst	6	2	0.0187586791259261	1
GO:0048812	BP	neuron projection morphogenesis	633	45	0.0187747950362521	1
GO:0007389	BP	pattern specification process	437	31	0.0187771210815972	1
GO:0046474	BP	glycerophospholipid biosynthetic process	219	16	0.0188385664256944	1
GO:0010033	BP	response to organic substance	3202	147	0.0188554306553244	1
GO:0018393	BP	internal peptidyl-lysine acetylation	151	12	0.0188899506096448	1
GO:0002429	BP	immune response-activating cell surface receptor signaling pathway	345	22	0.0190542554609033	1
GO:0002757	BP	immune response-activating signal transduction	345	22	0.0190542554609033	1
GO:0016314	MF	phosphatidylinositol-3	4	5-trisphosphate 3-phosphatase activity	5	2	0.0191010822318234	1
GO:0010959	BP	regulation of metal ion transport	378	25	0.0192322019058226	1
GO:0046904	MF	calcium oxalate binding	1	1	0.0192424786583787	1
GO:0120041	BP	positive regulation of macrophage proliferation	7	2	0.0194933323605969	1
GO:0030902	BP	hindbrain development	148	13	0.0196308813725974	1
GO:0034097	BP	response to cytokine	1154	56	0.019632065814056	1
GO:0010744	BP	positive regulation of macrophage derived foam cell differentiation	19	3	0.0197140422375949	1
GO:0004064	MF	arylesterase activity	6	2	0.0197761026106621	1
GO:0030619	MF	U1 snRNA binding	7	2	0.0201625257735639	1
GO:1904783	BP	positive regulation of NMDA glutamate receptor activity	6	2	0.0204226852292197	1
GO:0032331	BP	negative regulation of chondrocyte differentiation	23	4	0.0206542947288626	1
GO:0031076	BP	embryonic camera-type eye development	39	6	0.0207172440249729	1
GO:0006475	BP	internal protein amino acid acetylation	152	12	0.0207464771685162	1
GO:0098742	BP	cell-cell adhesion via plasma-membrane adhesion molecules	264	19	0.020785022770819	1
GO:0043197	CC	dendritic spine	169	15	0.0209391545037928	1
GO:0023056	BP	positive regulation of signaling	1804	91	0.0209780650107178	1
GO:0048584	BP	positive regulation of response to stimulus	2237	107	0.0210948738363504	1
GO:0051294	BP	establishment of spindle orientation	36	5	0.021257182582882	1
GO:0005838	CC	proteasome regulatory particle	20	3	0.0213035891127198	1
GO:0046321	BP	positive regulation of fatty acid oxidation	13	3	0.0214346375122601	1
GO:0044309	CC	neuron spine	170	15	0.0214966850719978	1
GO:0050998	MF	nitric-oxide synthase binding	13	3	0.0215211156680102	1
GO:0120040	BP	regulation of macrophage proliferation	8	2	0.0218488827937516	1
GO:0016055	BP	Wnt signaling pathway	496	33	0.0218994069994611	1
GO:0009966	BP	regulation of signal transduction	3029	146	0.0220102965651977	1
GO:0036301	BP	macrophage colony-stimulating factor production	5	2	0.0223626963691933	1
GO:1901256	BP	regulation of macrophage colony-stimulating factor production	5	2	0.0223626963691933	1
GO:0010748	BP	negative regulation of long-chain fatty acid import across plasma membrane	4	2	0.0223859241852161	1
GO:0140213	BP	negative regulation of long-chain fatty acid import into cell	4	2	0.0223859241852161	1
GO:1902993	BP	positive regulation of amyloid precursor protein catabolic process	24	4	0.0224005412823957	1
GO:0042813	MF	Wnt-activated receptor activity	15	3	0.022588685058986	1
GO:0000976	MF	transcription regulatory region sequence-specific DNA binding	1374	72	0.0225959376668464	1
GO:0034765	BP	regulation of ion transmembrane transport	460	30	0.0227343583301964	1
GO:0048596	BP	embryonic camera-type eye morphogenesis	28	5	0.022854453616313	1
GO:0021773	BP	striatal medium spiny neuron differentiation	4	2	0.0229494786673776	1
GO:0002433	BP	immune response-regulating cell surface receptor signaling pathway involved in phagocytosis	77	8	0.0230334812582672	1
GO:0038096	BP	Fc-gamma receptor signaling pathway involved in phagocytosis	77	8	0.0230334812582672	1
GO:1901532	BP	regulation of hematopoietic progenitor cell differentiation	84	8	0.0230610241698922	1
GO:0001067	MF	regulatory region nucleic acid binding	1375	72	0.0231679470215112	1
GO:0000978	MF	RNA polymerase II cis-regulatory region sequence-specific DNA binding	1035	56	0.0232411222835307	1
GO:0198738	BP	cell-cell signaling by wnt	498	33	0.0233100187298767	1
GO:2001245	BP	regulation of phosphatidylcholine biosynthetic process	5	2	0.0234904475076229	1
GO:0002685	BP	regulation of leukocyte migration	198	13	0.0234967227016994	1
GO:0033692	BP	cellular polysaccharide biosynthetic process	69	7	0.0236089769877906	1
GO:0016358	BP	dendrite development	227	19	0.0236790004161695	1
GO:0035270	BP	endocrine system development	123	12	0.0237360268536241	1
GO:0061180	BP	mammary gland epithelium development	70	8	0.0237839171963909	1
GO:0072223	BP	metanephric glomerular mesangium development	5	2	0.0238243239853556	1
GO:0035065	BP	regulation of histone acetylation	53	6	0.0238946169205318	1
GO:0001897	BP	cytolysis by symbiont of host cells	1	1	0.0239039216345817	1
GO:0001898	BP	regulation of cytolysis by symbiont of host cells	1	1	0.0239039216345817	1
GO:0001899	BP	negative regulation of cytolysis by symbiont of host cells	1	1	0.0239039216345817	1
GO:0051710	BP	regulation of cytolysis in other organism	1	1	0.0239039216345817	1
GO:0051711	BP	negative regulation of killing of cells of other organism	1	1	0.0239039216345817	1
GO:0051713	BP	negative regulation of cytolysis in other organism	1	1	0.0239039216345817	1
GO:0051802	BP	regulation of cytolysis in other organism involved in symbiotic interaction	1	1	0.0239039216345817	1
GO:0051803	BP	negative regulation of cytolysis in other organism involved in symbiotic interaction	1	1	0.0239039216345817	1
GO:0071345	BP	cellular response to cytokine stimulus	1070	52	0.0239970213186019	1
GO:1990782	MF	protein tyrosine kinase binding	97	9	0.0244022904677175	1
GO:0004632	MF	phosphopantothenate--cysteine ligase activity	1	1	0.0245670602231368	1
GO:0002768	BP	immune response-regulating cell surface receptor signaling pathway	376	23	0.024705670617252	1
GO:0010647	BP	positive regulation of cell communication	1797	90	0.0248182782383766	1
GO:0050776	BP	regulation of immune response	856	42	0.0249080044840445	1
GO:0043966	BP	histone H3 acetylation	58	6	0.0249316508829557	1
GO:0046471	BP	phosphatidylglycerol metabolic process	33	4	0.025157605614357	1
GO:0030111	BP	regulation of Wnt signaling pathway	359	25	0.0252514468794052	1
GO:0120039	BP	plasma membrane bounded cell projection morphogenesis	647	45	0.0253924317943558	1
GO:0018394	BP	peptidyl-lysine acetylation	159	12	0.0254708061300187	1
GO:0038094	BP	Fc-gamma receptor signaling pathway	80	8	0.0256344099122524	1
GO:0048023	BP	positive regulation of melanin biosynthetic process	6	2	0.0257908345289096	1
GO:1900378	BP	positive regulation of secondary metabolite biosynthetic process	6	2	0.0257908345289096	1
GO:1901340	BP	negative regulation of store-operated calcium channel activity	1	1	0.0259021375030681	1
GO:0002764	BP	immune response-regulating signaling pathway	379	23	0.0259700290405179	1
GO:0060354	BP	negative regulation of cell adhesion molecule production	7	2	0.026067061355306	1
GO:0031580	BP	membrane raft distribution	7	2	0.0260801157250029	1
GO:1905034	BP	regulation of antifungal innate immune response	1	1	0.0262151852339302	1
GO:1905036	BP	positive regulation of antifungal innate immune response	1	1	0.0262151852339302	1
GO:1905164	BP	positive regulation of phagosome maturation	1	1	0.0262151852339302	1
GO:0030579	BP	ubiquitin-dependent SMAD protein catabolic process	6	2	0.0262886193728117	1
GO:0006874	BP	cellular calcium ion homeostasis	432	26	0.026326359945936	1
GO:0044706	BP	multi-multicellular organism process	209	14	0.0263811265129635	1
GO:0048858	BP	cell projection morphogenesis	651	45	0.0267390866214505	1
GO:1990859	BP	cellular response to endothelin	1	1	0.0268094255367093	1
GO:0060820	BP	inactivation of X chromosome by heterochromatin assembly	1	1	0.0268723180883655	1
GO:0060821	BP	inactivation of X chromosome by DNA methylation	1	1	0.0268723180883655	1
GO:0021754	BP	facial nucleus development	1	1	0.0269408246926491	1
GO:0007596	BP	blood coagulation	319	21	0.0269750268465093	1
GO:0032791	MF	lead ion binding	1	1	0.0271641122604369	1
GO:0010759	BP	positive regulation of macrophage chemotaxis	19	3	0.0271800296247539	1
GO:0004506	MF	squalene monooxygenase activity	1	1	0.0272971257674693	1
GO:0045017	BP	glycerolipid biosynthetic process	252	17	0.027375290178469	1
GO:0002030	BP	inhibitory G protein-coupled receptor phosphorylation	1	1	0.0273801310295249	1
GO:0060182	MF	apelin receptor activity	1	1	0.0273801310295249	1
GO:0060183	BP	apelin receptor signaling pathway	1	1	0.0273801310295249	1
GO:1904323	BP	regulation of inhibitory G protein-coupled receptor phosphorylation	1	1	0.0273801310295249	1
GO:1904325	BP	positive regulation of inhibitory G protein-coupled receptor phosphorylation	1	1	0.0273801310295249	1
GO:1902036	BP	regulation of hematopoietic stem cell differentiation	71	7	0.0274374470569104	1
GO:0014070	BP	response to organic cyclic compound	897	48	0.0275228380139921	1
GO:0060440	BP	trachea formation	6	2	0.027555753029567	1
GO:0060739	BP	mesenchymal-epithelial cell signaling involved in prostate gland development	1	1	0.0275706588819763	1
GO:0140110	MF	transcription regulator activity	1840	92	0.0276139606097485	1
GO:0021942	BP	radial glia guided migration of Purkinje cell	4	2	0.027640641364862	1
GO:1904274	BP	tricellular tight junction assembly	1	1	0.0276899535689809	1
GO:0019079	BP	viral genome replication	120	9	0.0277023675936779	1
GO:0019853	BP	L-ascorbic acid biosynthetic process	1	1	0.0278131544523702	1
GO:0042839	BP	D-glucuronate metabolic process	1	1	0.0278131544523702	1
GO:0042840	BP	D-glucuronate catabolic process	1	1	0.0278131544523702	1
GO:0047939	MF	L-glucuronate reductase activity	1	1	0.0278131544523702	1
GO:0047941	MF	glucuronolactone reductase activity	1	1	0.0278131544523702	1
GO:0002373	BP	plasmacytoid dendritic cell cytokine production	1	1	0.0278906859150104	1
GO:0002736	BP	regulation of plasmacytoid dendritic cell cytokine production	1	1	0.0278906859150104	1
GO:0002737	BP	negative regulation of plasmacytoid dendritic cell cytokine production	1	1	0.0278906859150104	1
GO:0002336	BP	B-1 B cell lineage commitment	1	1	0.0279186225379733	1
GO:2000509	BP	negative regulation of dendritic cell chemotaxis	1	1	0.0279186225379733	1
GO:0004108	MF	citrate (Si)-synthase activity	1	1	0.0280182135164587	1
GO:0036440	MF	citrate synthase activity	1	1	0.0280182135164587	1
GO:0002113	MF	interleukin-33 binding	1	1	0.0280219429297324	1
GO:0004149	MF	dihydrolipoyllysine-residue succinyltransferase activity	1	1	0.0281175166069853	1
GO:0016751	MF	S-succinyltransferase activity	1	1	0.0281175166069853	1
GO:0071919	BP	G-quadruplex DNA formation	1	1	0.0281399157022232	1
GO:0035921	BP	desmosome disassembly	1	1	0.0281598442959941	1
GO:0015959	BP	diadenosine polyphosphate metabolic process	7	2	0.0281958356636684	1
GO:2000656	BP	regulation of apolipoprotein binding	1	1	0.0282113202784224	1
GO:2000657	BP	negative regulation of apolipoprotein binding	1	1	0.0282113202784224	1
GO:0003841	MF	1-acylglycerol-3-phosphate O-acyltransferase activity	13	3	0.0282383820052924	1
GO:0070524	MF	11-beta-hydroxysteroid dehydrogenase (NADP+) activity	1	1	0.0283210541060667	1
GO:0005093	MF	Rab GDP-dissociation inhibitor activity	1	1	0.0283575956878205	1
GO:0032580	CC	Golgi cisterna membrane	74	7	0.0283705704611213	1
GO:2000378	BP	negative regulation of reactive oxygen species metabolic process	59	6	0.0283772257698472	1
GO:0070412	MF	R-SMAD binding	23	4	0.0284077327083996	1
GO:0120192	BP	tight junction assembly	75	7	0.0285076600026406	1
GO:0009314	BP	response to radiation	426	25	0.028530356950196	1
GO:0007264	BP	small GTPase mediated signal transduction	474	31	0.0286896156543808	1
GO:0005667	CC	transcription regulator complex	392	26	0.0287575898114416	1
GO:0080163	BP	regulation of protein serine/threonine phosphatase activity	1	1	0.0288976680751162	1
GO:0048589	BP	developmental growth	634	40	0.0290147224193948	1
GO:0050817	BP	coagulation	324	21	0.0290913980585735	1
GO:0045176	BP	apical protein localization	13	3	0.0291108686071998	1
GO:0009607	BP	response to biotic stimulus	1395	62	0.0291872846169836	1
GO:0015012	BP	heparan sulfate proteoglycan biosynthetic process	25	4	0.0295439422735956	1
GO:0010324	BP	membrane invagination	69	7	0.0298840902308542	1
GO:0022624	CC	proteasome accessory complex	23	3	0.0299248576143171	1
GO:0046485	BP	ether lipid metabolic process	19	3	0.0299574776305732	1
GO:0046332	MF	SMAD binding	74	8	0.0299667171101255	1
GO:0016413	MF	O-acetyltransferase activity	7	2	0.0300005730599827	1
GO:0004458	MF	D-lactate dehydrogenase (cytochrome) activity	1	1	0.0300215555596929	1
GO:0008720	MF	D-lactate dehydrogenase activity	1	1	0.0300215555596929	1
GO:0016898	MF	oxidoreductase activity	acting on the CH-OH group of donors	cytochrome as acceptor	1	1	0.0300215555596929	1
GO:1903457	BP	lactate catabolic process	1	1	0.0300215555596929	1
GO:0060541	BP	respiratory system development	199	16	0.030026872563187	1
GO:0051246	BP	regulation of protein metabolic process	2724	125	0.0302903084438294	1
GO:0071827	BP	plasma lipoprotein particle organization	51	5	0.0304281215058865	1
GO:0071872	BP	cellular response to epinephrine stimulus	13	3	0.0304622021067508	1
GO:0010768	BP	negative regulation of transcription from RNA polymerase II promoter in response to UV-induced DNA damage	1	1	0.0305322162617702	1
GO:0010746	BP	regulation of long-chain fatty acid import across plasma membrane	5	2	0.0305782362743418	1
GO:0045123	BP	cellular extravasation	64	6	0.0306766342313545	1
GO:1900034	BP	regulation of cellular response to heat	79	7	0.0309677007640286	1
GO:0014064	BP	positive regulation of serotonin secretion	1	1	0.0310197820550012	1
GO:0019811	MF	cocaine binding	1	1	0.0310197820550012	1
GO:0090067	BP	regulation of thalamus size	1	1	0.0310197820550012	1
GO:0021540	BP	corpus callosum morphogenesis	6	2	0.0312520321086405	1
GO:0007599	BP	hemostasis	323	21	0.031296716037628	1
GO:0042799	MF	histone methyltransferase activity (H4-K20 specific)	5	2	0.0314132434476283	1
GO:0034045	CC	phagophore assembly site membrane	15	3	0.031586074435987	1
GO:0090299	BP	regulation of neural crest formation	1	1	0.0317462548162453	1
GO:0090301	BP	negative regulation of neural crest formation	1	1	0.0317462548162453	1
GO:2000314	BP	negative regulation of fibroblast growth factor receptor signaling pathway involved in neural plate anterior/posterior pattern formation	1	1	0.0317462548162453	1
GO:0003676	MF	nucleic acid binding	3895	164	0.031817817376434	1
GO:0034594	MF	phosphatidylinositol trisphosphate phosphatase activity	7	2	0.0318346305360063	1
GO:0002431	BP	Fc receptor mediated stimulatory signaling pathway	83	8	0.0321297942180442	1
GO:0014801	CC	longitudinal sarcoplasmic reticulum	1	1	0.0321957128670416	1
GO:0001843	BP	neural tube closure	89	9	0.0323827709032152	1
GO:0006357	BP	regulation of transcription by RNA polymerase II	2365	115	0.0325153698333605	1
GO:0098737	BP	protein insertion into plasma membrane	1	1	0.0327137539143186	1
GO:0120003	CC	hinge region between urothelial plaques of apical plasma membrane	1	1	0.0327137539143186	1
GO:0031225	CC	anchored component of membrane	162	12	0.0327557843350052	1
GO:1905150	BP	regulation of voltage-gated sodium channel activity	6	2	0.0327874886637843	1
GO:0120193	BP	tight junction organization	78	7	0.0329024595752333	1
GO:0030368	MF	interleukin-17 receptor activity	8	2	0.0329185999360764	1
GO:0018142	BP	protein-DNA covalent cross-linking	1	1	0.0330608255672843	1
GO:0018143	BP	nucleic acid-protein covalent cross-linking	1	1	0.0330608255672843	1
GO:0008654	BP	phospholipid biosynthetic process	260	17	0.033120505609317	1
GO:0072008	BP	glomerular mesangial cell differentiation	6	2	0.0331521384813244	1
GO:1902275	BP	regulation of chromatin organization	185	13	0.0332011557979243	1
GO:0008219	BP	cell death	2137	101	0.03324340557987	1
GO:0070062	CC	extracellular exosome	2039	92	0.0333197231073267	1
GO:0071407	BP	cellular response to organic cyclic compound	556	32	0.0333366499108666	1
GO:0070411	MF	I-SMAD binding	14	3	0.0333475218353569	1
GO:0016151	MF	nickel cation binding	1	1	0.0334255741840383	1
GO:0060606	BP	tube closure	90	9	0.0336565088230852	1
GO:0070345	BP	negative regulation of fat cell proliferation	5	2	0.0337714498442534	1
GO:0036053	CC	glomerular endothelium fenestra	1	1	0.0337943970722374	1
GO:1900035	BP	negative regulation of cellular response to heat	1	1	0.0337943970722374	1
GO:0006950	BP	response to stress	3824	163	0.0338700816946089	1
GO:0048569	BP	post-embryonic animal organ development	15	3	0.0343483872070164	1
GO:0048681	BP	negative regulation of axon regeneration	14	3	0.0343872667093665	1
GO:0005976	BP	polysaccharide metabolic process	106	9	0.0344715020963766	1
GO:0051172	BP	negative regulation of nitrogen compound metabolic process	2385	113	0.0347517317269083	1
GO:0048666	BP	neuron development	1087	66	0.0347721422645392	1
GO:0021924	BP	cell proliferation in external granule layer	15	3	0.0351064961700908	1
GO:0021930	BP	cerebellar granule cell precursor proliferation	15	3	0.0351064961700908	1
GO:0035871	BP	protein K11-linked deubiquitination	9	2	0.0351659339483903	1
GO:2001025	BP	positive regulation of response to drug	1	1	0.035168503668431	1
GO:2001040	BP	positive regulation of cellular response to drug	1	1	0.035168503668431	1
GO:0004518	MF	nuclease activity	195	12	0.0352212079725764	1
GO:2000756	BP	regulation of peptidyl-lysine acetylation	59	6	0.0353969457052606	1
GO:0031143	CC	pseudopodium	16	3	0.0355104460089274	1
GO:0001736	BP	establishment of planar polarity	119	10	0.0356284892796673	1
GO:0007164	BP	establishment of tissue polarity	119	10	0.0356284892796673	1
GO:0055074	BP	calcium ion homeostasis	444	26	0.0356400770054276	1
GO:0097048	BP	dendritic cell apoptotic process	10	2	0.0356663919482788	1
GO:2000668	BP	regulation of dendritic cell apoptotic process	10	2	0.0356663919482788	1
GO:0032924	BP	activin receptor signaling pathway	41	5	0.0358778210131558	1
GO:0004519	MF	endonuclease activity	114	8	0.0359169231405574	1
GO:0032990	BP	cell part morphogenesis	670	45	0.0363004634585873	1
GO:0000132	BP	establishment of mitotic spindle orientation	30	4	0.0363615815812469	1
GO:2000736	BP	regulation of stem cell differentiation	116	10	0.0363930588008184	1
GO:0044260	BP	cellular macromolecule metabolic process	7777	322	0.0364129624544428	1
GO:0002253	BP	activation of immune response	429	24	0.0364296342083199	1
GO:0060322	BP	head development	758	47	0.0365526826745942	1
GO:2000811	BP	negative regulation of anoikis	17	3	0.0365811350385469	1
GO:0006662	BP	glycerol ether metabolic process	21	3	0.0367442756341957	1
GO:1904929	MF	coreceptor activity involved in Wnt signaling pathway	planar cell polarity pathway	5	2	0.0368234068485969	1
GO:0000407	CC	phagophore assembly site	30	4	0.0368425813372659	1
GO:0031056	BP	regulation of histone modification	140	11	0.0369638001247028	1
GO:0034046	MF	poly(G) binding	7	2	0.0371395731256178	1
GO:0007166	BP	cell surface receptor signaling pathway	2899	138	0.0372011355450276	1
GO:0030280	MF	structural constituent of skin epidermis	14	2	0.0372589888385509	1
GO:0071486	BP	cellular response to high light intensity	1	1	0.0373199284484248	1
GO:0097473	BP	retinal rod cell apoptotic process	1	1	0.0373199284484248	1
GO:0021535	BP	cell migration in hindbrain	14	3	0.0376326968431941	1
GO:1990138	BP	neuron projection extension	162	14	0.0376589729445417	1
GO:0021534	BP	cell proliferation in hindbrain	16	3	0.037916533587737	1
GO:1903779	BP	regulation of cardiac conduction	70	7	0.0379184169211585	1
GO:1905144	BP	response to acetylcholine	29	4	0.0380033788020408	1
GO:1905145	BP	cellular response to acetylcholine	29	4	0.0380033788020408	1
GO:0043584	BP	nose development	15	3	0.0381126618544127	1
GO:0030278	BP	regulation of ossification	202	15	0.038205884037971	1
GO:0001763	BP	morphogenesis of a branching structure	196	16	0.0383651601496207	1
GO:0019725	BP	cellular homeostasis	917	47	0.0385690280023983	1
GO:0045744	BP	negative regulation of G protein-coupled receptor signaling pathway	46	5	0.0387139298998969	1
GO:0048669	BP	collateral sprouting in absence of injury	5	2	0.0388211336423944	1
GO:0060841	BP	venous blood vessel development	15	3	0.0388673786714596	1
GO:0032279	CC	asymmetric synapse	326	24	0.039001113938142	1
GO:0002069	BP	columnar/cuboidal epithelial cell maturation	7	2	0.0390299064613717	1
GO:0009967	BP	positive regulation of signal transduction	1618	80	0.0392426217164906	1
GO:0016791	MF	phosphatase activity	265	17	0.039789563977872	1
GO:0035235	BP	ionotropic glutamate receptor signaling pathway	25	4	0.039823088224214	1
GO:0045322	MF	unmethylated CpG binding	7	2	0.0398680867223998	1
GO:0042171	MF	lysophosphatidic acid acyltransferase activity	15	3	0.0399405354782281	1
GO:0030326	BP	embryonic limb morphogenesis	126	12	0.0399624531250266	1
GO:0035113	BP	embryonic appendage morphogenesis	126	12	0.0399624531250266	1
GO:0070571	BP	negative regulation of neuron projection regeneration	15	3	0.0399708350902908	1
GO:0031324	BP	negative regulation of cellular metabolic process	2572	120	0.0400176930980446	1
GO:0055082	BP	cellular chemical homeostasis	780	41	0.0400431376089676	1
GO:0032268	BP	regulation of cellular protein metabolic process	2592	118	0.0403636225285489	1
GO:0017147	MF	Wnt-protein binding	28	4	0.0404231121002529	1
GO:0097433	CC	dense body	6	2	0.040433623766582	1
GO:0008946	MF	oligonucleotidase activity	1	1	0.0405000085184713	1
GO:0034611	MF	oligoribonucleotidase activity	1	1	0.0405000085184713	1
GO:0043331	BP	response to dsRNA	40	4	0.0406104440633271	1
GO:0004671	MF	protein C-terminal S-isoprenylcysteine carboxyl O-methyltransferase activity	1	1	0.0406709245438499	1
GO:0005882	CC	intermediate filament	193	10	0.0407349975557337	1
GO:1901509	BP	regulation of endothelial tube morphogenesis	7	2	0.0407700175047973	1
GO:0002520	BP	immune system development	976	51	0.0409650403823862	1
GO:2000192	BP	negative regulation of fatty acid transport	7	2	0.0411029828307862	1
GO:0019843	MF	rRNA binding	60	5	0.0411102180665004	1
GO:0060485	BP	mesenchyme development	276	20	0.0414557731119144	1
GO:0007050	BP	cell cycle arrest	228	15	0.0416819190868908	1
GO:0010837	BP	regulation of keratinocyte proliferation	38	4	0.0417840654824067	1
GO:0017151	MF	DEAD/H-box RNA helicase binding	8	2	0.0418578143345586	1
GO:0009583	BP	detection of light stimulus	67	6	0.041983049433218	1
GO:0000271	BP	polysaccharide biosynthetic process	76	7	0.0420893643974895	1
GO:0060717	BP	chorion development	7	2	0.0423303005726362	1
GO:0021915	BP	neural tube development	160	13	0.0424326761007085	1
GO:0009653	BP	anatomical structure morphogenesis	2681	137	0.0428544465576024	1
GO:0016185	BP	synaptic vesicle budding from presynaptic endocytic zone membrane	8	2	0.0428631757803823	1
GO:0060999	BP	positive regulation of dendritic spine development	38	5	0.0429735252881066	1
GO:0061037	BP	negative regulation of cartilage development	30	4	0.0430783532407958	1
GO:0070742	MF	C2H2 zinc finger domain binding	13	3	0.0431259244916193	1
GO:2001257	BP	regulation of cation channel activity	173	13	0.0431704621011035	1
GO:2000502	BP	negative regulation of natural killer cell chemotaxis	2	1	0.0431910644430245	1
GO:0048679	BP	regulation of axon regeneration	27	4	0.0433701603641834	1
GO:0048588	BP	developmental cell growth	221	17	0.0434146854052863	1
GO:0005159	MF	insulin-like growth factor receptor binding	16	3	0.0434659864940795	1
GO:0043248	BP	proteasome assembly	12	2	0.0436132142756655	1
GO:0031985	CC	Golgi cisterna	97	8	0.0438975130030487	1
GO:0018024	MF	histone-lysine N-methyltransferase activity	41	5	0.0441430844470917	1
GO:0005979	BP	regulation of glycogen biosynthetic process	29	4	0.0443331403696197	1
GO:0010962	BP	regulation of glucan biosynthetic process	29	4	0.0443331403696197	1
GO:0016004	MF	phospholipase activator activity	11	2	0.0444619153839873	1
GO:0045861	BP	negative regulation of proteolysis	336	18	0.0447173176146103	1
GO:0052548	BP	regulation of endopeptidase activity	409	22	0.0448152544025256	1
GO:0098542	BP	defense response to other organism	1031	45	0.0449517524225166	1
GO:0015026	MF	coreceptor activity	45	5	0.0450163062276824	1
GO:0014808	BP	release of sequestered calcium ion into cytosol by sarcoplasmic reticulum	34	4	0.0450935172929239	1
GO:0014020	BP	primary neural tube formation	96	9	0.045094514907018	1
GO:0098984	CC	neuron to neuron synapse	349	25	0.0452246170001202	1
GO:0048468	BP	cell development	2108	111	0.0460599434750718	1
GO:1900150	BP	regulation of defense response to fungus	2	1	0.0461528156603909	1
GO:0045634	BP	regulation of melanocyte differentiation	6	2	0.046283235577275	1
GO:0021546	BP	rhombomere development	7	2	0.0463084339470896	1
GO:0006654	BP	phosphatidic acid biosynthetic process	48	5	0.0463492089343562	1
GO:0071825	BP	protein-lipid complex subunit organization	55	5	0.0464423586222707	1
GO:0008611	BP	ether lipid biosynthetic process	11	2	0.0465044520369161	1
GO:0046504	BP	glycerol ether biosynthetic process	11	2	0.0465044520369161	1
GO:0097384	BP	cellular lipid biosynthetic process	11	2	0.0465044520369161	1
GO:0098771	BP	inorganic ion homeostasis	705	37	0.0465381163526913	1
GO:0097011	BP	cellular response to granulocyte macrophage colony-stimulating factor stimulus	9	2	0.046628016089553	1
GO:0097012	BP	response to granulocyte macrophage colony-stimulating factor	9	2	0.046628016089553	1
GO:0072678	BP	T cell migration	60	5	0.0467066713273162	1
GO:0002376	BP	immune system process	2818	121	0.0468431073274886	1
GO:0002692	BP	negative regulation of cellular extravasation	9	2	0.0469232143560612	1
GO:0050878	BP	regulation of body fluid levels	482	28	0.0469939627519913	1
GO:0072007	BP	mesangial cell differentiation	7	2	0.0470067231643829	1
GO:0035759	BP	mesangial cell-matrix adhesion	2	1	0.0471177117878296	1
GO:0032196	BP	transposition	29	3	0.0471988568233946	1
GO:0045595	BP	regulation of cell differentiation	1848	95	0.0472945984872222	1
GO:1903514	BP	release of sequestered calcium ion into cytosol by endoplasmic reticulum	35	4	0.0474446695704898	1
GO:0043410	BP	positive regulation of MAPK cascade	529	30	0.0475823019034684	1
GO:0072109	BP	glomerular mesangium development	16	3	0.047618048841588	1
GO:0002684	BP	positive regulation of immune system process	937	45	0.0476212799951399	1
GO:0031545	MF	peptidyl-proline 4-dioxygenase activity	8	2	0.0476559489794063	1
GO:0007157	BP	heterophilic cell-cell adhesion via plasma membrane cell adhesion molecules	45	5	0.0477084034473286	1
GO:0090265	BP	positive regulation of immune complex clearance by monocytes and macrophages	2	1	0.0478579222874221	1
GO:0017158	BP	regulation of calcium ion-dependent exocytosis	42	5	0.0479449029539145	1
GO:0030182	BP	neuron differentiation	1342	78	0.0479465837877374	1
GO:0090407	BP	organophosphate biosynthetic process	560	30	0.0480211269109356	1
GO:0016569	BP	covalent chromatin modification	447	26	0.0482364660337231	1
GO:0002688	BP	regulation of leukocyte chemotaxis	116	8	0.0483432951658466	1
GO:0034637	BP	cellular carbohydrate biosynthetic process	84	7	0.0483749019152878	1
GO:0032330	BP	regulation of chondrocyte differentiation	51	6	0.0484347526696613	1
GO:0071617	MF	lysophospholipid acyltransferase activity	17	3	0.048469256825008	1
GO:0045069	BP	regulation of viral genome replication	95	7	0.0485663166261209	1
GO:0034605	BP	cellular response to heat	121	9	0.0485713933241174	1
GO:0048539	BP	bone marrow development	9	2	0.0485903436937801	1
GO:0007420	BP	brain development	717	44	0.0487011613926101	1
GO:0000139	CC	Golgi membrane	713	38	0.0487650374994096	1
GO:0002902	BP	regulation of B cell apoptotic process	19	3	0.0490753783196159	1
GO:0050778	BP	positive regulation of immune response	621	31	0.049114304995799	1
GO:0003677	MF	DNA binding	2300	106	0.0493380413872036	1
GO:0000902	BP	cell morphogenesis	991	60	0.0493598961182311	1
GO:0050251	MF	retinol isomerase activity	2	1	0.0495176803463638	1
GO:0004794	MF	L-threonine ammonia-lyase activity	2	1	0.0495970266916319	1
GO:0048583	BP	regulation of response to stimulus	4027	180	0.0498265056907616	1
GO:0050707	BP	regulation of cytokine secretion	55	5	0.0499177645196724	1
GO:0048839	BP	inner ear development	195	15	0.0499774018147964	1
GO:0050805	BP	negative regulation of synaptic transmission	71	7	0.0500719662394617	1
GO:0001770	BP	establishment of natural killer cell polarity	1	1	0.0502403830788199	1
GO:0034351	BP	negative regulation of glial cell apoptotic process	7	2	0.05025776332625	1
GO:0006366	BP	transcription by RNA polymerase II	2501	118	0.0503845466702836	1
GO:0045913	BP	positive regulation of carbohydrate metabolic process	82	7	0.0505458255137605	1
GO:0016411	MF	acylglycerol O-acyltransferase activity	19	3	0.0505676998186875	1
GO:0098760	BP	response to interleukin-7	37	4	0.0506035440566718	1
GO:0098761	BP	cellular response to interleukin-7	37	4	0.0506035440566718	1
GO:0006959	BP	humoral immune response	236	12	0.0508333073949154	1
GO:0080135	BP	regulation of cellular response to stress	738	39	0.0509286421178444	1
GO:0019827	BP	stem cell population maintenance	157	12	0.0510125455897828	1
GO:0001867	BP	complement activation	lectin pathway	12	2	0.0511678743163843	1
GO:0031594	CC	neuromuscular junction	74	7	0.051225131506831	1
GO:0043967	BP	histone H4 acetylation	65	6	0.0512660809294411	1
GO:0060020	BP	Bergmann glial cell differentiation	8	2	0.0512872227760457	1
GO:0010578	BP	regulation of adenylate cyclase activity involved in G protein-coupled receptor signaling pathway	1	1	0.0513776777038084	1
GO:0003168	BP	Purkinje myocyte differentiation	1	1	0.0514293961783636	1
GO:0060927	BP	cardiac pacemaker cell fate commitment	1	1	0.0514293961783636	1
GO:0060929	BP	atrioventricular node cell fate commitment	1	1	0.0514293961783636	1
GO:0008504	MF	monoamine transmembrane transporter activity	9	2	0.0514403373413837	1
GO:0046578	BP	regulation of Ras protein signal transduction	181	14	0.0517786402025082	1
GO:0072503	BP	cellular divalent inorganic cation homeostasis	467	26	0.0518157837358904	1
GO:0051657	BP	maintenance of organelle location	11	2	0.0518931161450986	1
GO:0009584	BP	detection of visible light	55	5	0.051917786724404	1
GO:0051209	BP	release of sequestered calcium ion into cytosol	115	9	0.0521796014937935	1
GO:0009408	BP	response to heat	161	11	0.0522852052886338	1
GO:0034677	CC	integrin alpha7-beta1 complex	1	1	0.0523285254562125	1
GO:0051943	BP	positive regulation of amino acid uptake involved in synaptic transmission	1	1	0.0523285254562125	1
GO:0051951	BP	positive regulation of glutamate uptake involved in transmission of nerve impulse	1	1	0.0523285254562125	1
GO:0034762	BP	regulation of transmembrane transport	545	32	0.0524266560704312	1
GO:0140212	BP	regulation of long-chain fatty acid import into cell	7	2	0.0524646089634072	1
GO:0015014	BP	heparan sulfate proteoglycan biosynthetic process	polysaccharide chain biosynthetic process	8	2	0.0525778810248859	1
GO:1905114	BP	cell surface receptor signaling pathway involved in cell-cell signaling	599	37	0.0527752252513978	1
GO:0046825	BP	regulation of protein export from nucleus	38	4	0.0528853100743472	1
GO:0010795	BP	regulation of ubiquinone biosynthetic process	2	1	0.0528978034320668	1
GO:0045664	BP	regulation of neuron differentiation	639	41	0.0529585006089704	1
GO:0030020	MF	extracellular matrix structural constituent conferring tensile strength	39	5	0.0530085316056038	1
GO:2000401	BP	regulation of lymphocyte migration	59	5	0.0530211361133103	1
GO:0090502	BP	RNA phosphodiester bond hydrolysis	endonucleolytic	79	6	0.0530651414196787	1
GO:0061847	BP	response to cholecystokinin	2	1	0.053066428407672	1
GO:0016050	BP	vesicle organization	326	19	0.0530698173102486	1
GO:0035970	BP	peptidyl-threonine dephosphorylation	21	3	0.0532298544640074	1
GO:0045956	BP	positive regulation of calcium ion-dependent exocytosis	18	3	0.0533377777439297	1
GO:0052547	BP	regulation of peptidase activity	440	23	0.053342491856136	1
GO:0042482	BP	positive regulation of odontogenesis	10	2	0.0533825705371482	1
GO:0001868	BP	regulation of complement activation	lectin pathway	2	1	0.0534596003263438	1
GO:0001869	BP	negative regulation of complement activation	lectin pathway	2	1	0.0534596003263438	1
GO:1903077	BP	negative regulation of protein localization to plasma membrane	23	3	0.0534602021708871	1
GO:0098727	BP	maintenance of cell number	159	12	0.0536643233104702	1
GO:0032906	BP	transforming growth factor beta2 production	8	2	0.053773841862332	1
GO:0032909	BP	regulation of transforming growth factor beta2 production	8	2	0.053773841862332	1
GO:0035685	BP	helper T cell diapedesis	2	1	0.0538243153624761	1
GO:1902961	BP	positive regulation of aspartic-type endopeptidase activity involved in amyloid precursor protein catabolic process	7	2	0.0538548206823974	1
GO:0051283	BP	negative regulation of sequestering of calcium ion	116	9	0.053919982732367	1
GO:0002730	BP	regulation of dendritic cell cytokine production	12	2	0.0539510195225885	1
GO:0007084	BP	mitotic nuclear envelope reassembly	9	2	0.053990910113595	1
GO:0004033	MF	aldo-keto reductase (NADP) activity	27	3	0.0542149879094879	1
GO:0002100	BP	tRNA wobble adenosine to inosine editing	2	1	0.0542746883717708	1
GO:0052717	MF	tRNA-specific adenosine-34 deaminase activity	2	1	0.0542746883717708	1
GO:0052718	CC	tRNA-specific adenosine-34 deaminase complex	2	1	0.0542746883717708	1
GO:0030867	CC	rough endoplasmic reticulum membrane	27	3	0.0543814556775512	1
GO:0150003	BP	regulation of spontaneous synaptic transmission	7	2	0.0543883019716979	1
GO:0003845	MF	11-beta-hydroxysteroid dehydrogenase [NAD(P)] activity	2	1	0.0543953036273227	1
GO:0008480	MF	sarcosine dehydrogenase activity	1	1	0.0545444588646028	1
GO:1901053	BP	sarcosine catabolic process	1	1	0.0545444588646028	1
GO:0043010	BP	camera-type eye development	324	22	0.0545672745188795	1
GO:0035683	BP	memory T cell extravasation	2	1	0.0545792300895817	1
GO:0046473	BP	phosphatidic acid metabolic process	50	5	0.0546315379973915	1
GO:0016031	BP	tRNA import into mitochondrion	2	1	0.0546558866527994	1
GO:0070096	BP	mitochondrial outer membrane translocase complex assembly	2	1	0.0546558866527994	1
GO:0010616	BP	negative regulation of cardiac muscle adaptation	8	2	0.0546680753191523	1
GO:1903243	BP	negative regulation of cardiac muscle hypertrophy in response to stress	8	2	0.0546680753191523	1
GO:1903561	CC	extracellular vesicle	2123	92	0.0546799081593029	1
GO:0006900	BP	vesicle budding from membrane	107	8	0.0548907300462356	1
GO:0070537	BP	histone H2A K63-linked deubiquitination	2	1	0.0549124053872292	1
GO:0071144	CC	heteromeric SMAD protein complex	8	2	0.0549329863574282	1
GO:0043543	BP	protein acylation	226	14	0.0549415488018857	1
GO:0017060	MF	3-galactosyl-N-acetylglucosaminide 4-alpha-L-fucosyltransferase activity	2	1	0.0550394882796566	1
GO:0014069	CC	postsynaptic density	321	23	0.0552485160071738	1
GO:1901888	BP	regulation of cell junction assembly	188	15	0.0553395523083451	1
GO:0043230	CC	extracellular organelle	2125	92	0.05547199164767	1
GO:0005086	MF	ARF guanyl-nucleotide exchange factor activity	18	3	0.0555935438289399	1
GO:0016748	MF	succinyltransferase activity	2	1	0.0556488166955097	1
GO:2000536	BP	negative regulation of entry of bacterium into host cell	2	1	0.0557636303004903	1
GO:0000045	BP	autophagosome assembly	91	7	0.0558193339877404	1
GO:0090575	CC	RNA polymerase II transcription regulator complex	152	11	0.0559222312636211	1
GO:0051293	BP	establishment of spindle localization	45	5	0.0559653905859614	1
GO:0051610	BP	serotonin uptake	10	2	0.056165483960302	1
GO:0035107	BP	appendage morphogenesis	148	13	0.0561676532858234	1
GO:0035108	BP	limb morphogenesis	148	13	0.0561676532858234	1
GO:0006997	BP	nucleus organization	131	9	0.056250056363159	1
GO:1902203	BP	negative regulation of hepatocyte growth factor receptor signaling pathway	1	1	0.0562505530918991	1
GO:2001112	BP	regulation of cellular response to hepatocyte growth factor stimulus	1	1	0.0562505530918991	1
GO:2001113	BP	negative regulation of cellular response to hepatocyte growth factor stimulus	1	1	0.0562505530918991	1
GO:0043112	BP	receptor metabolic process	187	13	0.0562710421824714	1
GO:1905523	BP	positive regulation of macrophage migration	26	3	0.0562786728702424	1
GO:0018153	BP	isopeptide cross-linking via N6-(L-isoglutamyl)-L-lysine	2	1	0.0564603678502816	1
GO:0018262	BP	isopeptide cross-linking	2	1	0.0564603678502816	1
GO:2000615	BP	regulation of histone H3-K9 acetylation	10	2	0.0564837292796454	1
GO:0001917	CC	photoreceptor inner segment	58	5	0.0565870481361245	1
GO:0048678	BP	response to axon injury	77	7	0.0568180276392506	1
GO:0032771	BP	regulation of monophenol monooxygenase activity	1	1	0.0568287273811335	1
GO:0032773	BP	positive regulation of monophenol monooxygenase activity	1	1	0.0568287273811335	1
GO:0051796	BP	negative regulation of timing of catagen	1	1	0.0568287273811335	1
GO:0060901	BP	regulation of hair cycle by canonical Wnt signaling pathway	1	1	0.0568287273811335	1
GO:1902908	BP	regulation of melanosome transport	1	1	0.0568287273811335	1
GO:1902910	BP	positive regulation of melanosome transport	1	1	0.0568287273811335	1
GO:0010767	BP	regulation of transcription from RNA polymerase II promoter in response to UV-induced DNA damage	2	1	0.0568395198011798	1
GO:0060229	MF	lipase activator activity	13	2	0.0568913763801797	1
GO:0051282	BP	regulation of sequestering of calcium ion	118	9	0.0569032469682766	1
GO:0061517	BP	macrophage proliferation	12	2	0.0569925347368399	1
GO:0019862	MF	IgA binding	3	1	0.0571675638639145	1
GO:0061833	BP	protein localization to tricellular tight junction	2	1	0.0576470971270265	1
GO:0099154	CC	serotonergic synapse	2	1	0.057732363236081	1
GO:1903952	BP	regulation of voltage-gated potassium channel activity involved in atrial cardiac muscle cell action potential repolarization	1	1	0.0577567551723628	1
GO:1903954	BP	positive regulation of voltage-gated potassium channel activity involved in atrial cardiac muscle cell action potential repolarization	1	1	0.0577567551723628	1
GO:0042135	BP	neurotransmitter catabolic process	9	2	0.0577668398933553	1
GO:0032009	CC	early phagosome	12	2	0.057776857050437	1
GO:0017124	MF	SH3 domain binding	124	10	0.0578545257158452	1
GO:1990167	BP	protein K27-linked deubiquitination	2	1	0.0581962916843262	1
GO:0097753	BP	membrane bending	2	1	0.0582310265468089	1
GO:0070570	BP	regulation of neuron projection regeneration	30	4	0.0583610959927488	1
GO:0010585	BP	glutamine secretion	1	1	0.0583722175180894	1
GO:1903803	BP	L-glutamine import across plasma membrane	1	1	0.0583722175180894	1
GO:0031640	BP	killing of cells of other organism	60	4	0.0585099347302634	1
GO:0005135	MF	interleukin-3 receptor binding	2	1	0.0585636491264419	1
GO:0001893	BP	maternal placenta development	35	4	0.0585864889401723	1
GO:0016051	BP	carbohydrate biosynthetic process	204	13	0.0587310723123023	1
GO:0055080	BP	cation homeostasis	695	36	0.0587850394708363	1
GO:0060638	BP	mesenchymal-epithelial cell signaling	8	2	0.0588070995204564	1
GO:0150172	BP	regulation of phosphatidylcholine metabolic process	8	2	0.0588165294563123	1
GO:0012501	BP	programmed cell death	2000	93	0.0588321239413064	1
GO:0098589	CC	membrane region	331	21	0.0589661631195127	1
GO:1905521	BP	regulation of macrophage migration	44	4	0.0589887855846971	1
GO:0004825	MF	methionine-tRNA ligase activity	2	1	0.0590075348093292	1
GO:0006431	BP	methionyl-tRNA aminoacylation	2	1	0.0590075348093292	1
GO:0040001	BP	establishment of mitotic spindle localization	35	4	0.0591100630549228	1
GO:0070381	CC	endosome to plasma membrane transport vesicle	2	1	0.0592566897151573	1
GO:0060825	BP	fibroblast growth factor receptor signaling pathway involved in neural plate anterior/posterior pattern formation	2	1	0.0593048728247536	1
GO:2000313	BP	regulation of fibroblast growth factor receptor signaling pathway involved in neural plate anterior/posterior pattern formation	2	1	0.0593048728247536	1
GO:0071310	BP	cellular response to organic substance	2612	119	0.0593489021713887	1
GO:0046697	BP	decidualization	25	3	0.0595109870156748	1
GO:0048048	BP	embryonic eye morphogenesis	37	5	0.0595696026649804	1
GO:0055108	BP	Golgi to transport vesicle transport	1	1	0.0598345604715397	1
GO:1990386	BP	mitotic cleavage furrow ingression	1	1	0.0598345604715397	1
GO:1990583	MF	phospholipase D activator activity	1	1	0.0598345604715397	1
GO:0016570	BP	histone modification	434	25	0.0598355151100728	1
GO:1902531	BP	regulation of intracellular signal transduction	1770	85	0.0598474118412343	1
GO:0097621	MF	monoamine oxidase activity	1	1	0.0600435542200048	1
GO:0014832	BP	urinary bladder smooth muscle contraction	7	2	0.0600518647962206	1
GO:0014848	BP	urinary tract smooth muscle contraction	7	2	0.0600518647962206	1
GO:0014009	BP	glial cell proliferation	48	5	0.0601731780410855	1
GO:0035565	BP	regulation of pronephros size	1	1	0.0602613412593368	1
GO:0061017	BP	hepatoblast differentiation	1	1	0.0602613412593368	1
GO:0061206	BP	mesonephros morphogenesis	1	1	0.0602613412593368	1
GO:0061215	BP	mesonephric nephron development	1	1	0.0602613412593368	1
GO:0061228	BP	mesonephric nephron morphogenesis	1	1	0.0602613412593368	1
GO:0061235	BP	mesenchymal stem cell maintenance involved in mesonephric nephron morphogenesis	1	1	0.0602613412593368	1
GO:0061295	BP	regulation of mesenchymal cell apoptotic process involved in mesonephric nephron morphogenesis	1	1	0.0602613412593368	1
GO:0061296	BP	negative regulation of mesenchymal cell apoptotic process involved in mesonephric nephron morphogenesis	1	1	0.0602613412593368	1
GO:1901146	BP	mesenchymal cell apoptotic process involved in mesonephric nephron morphogenesis	1	1	0.0602613412593368	1
GO:0002080	CC	acrosomal membrane	26	3	0.0602688170561472	1
GO:0043276	BP	anoikis	33	4	0.0602716313788412	1
GO:0002436	BP	immune complex clearance by monocytes and macrophages	3	1	0.0602742622463646	1
GO:0090264	BP	regulation of immune complex clearance by monocytes and macrophages	3	1	0.0602742622463646	1
GO:0007267	BP	cell-cell signaling	1682	87	0.0602888672100218	1
GO:0032927	BP	positive regulation of activin receptor signaling pathway	8	2	0.0603955010675918	1
GO:0043408	BP	regulation of MAPK cascade	717	38	0.0604011896118496	1
GO:0070302	BP	regulation of stress-activated protein kinase signaling cascade	229	15	0.0605822055816394	1
GO:0007399	BP	nervous system development	2328	122	0.0607003965033421	1
GO:0044703	BP	multi-organism reproductive process	954	44	0.0608131686269713	1
GO:0002371	BP	dendritic cell cytokine production	13	2	0.0611696746467214	1
GO:0006473	BP	protein acetylation	185	12	0.0611949677961205	1
GO:1901983	BP	regulation of protein acetylation	70	6	0.0613122653697777	1
GO:0004820	MF	glycine-tRNA ligase activity	1	1	0.0613954439856354	1
GO:0006426	BP	glycyl-tRNA aminoacylation	1	1	0.0613954439856354	1
GO:0070150	BP	mitochondrial glycyl-tRNA aminoacylation	1	1	0.0613954439856354	1
GO:0030879	BP	mammary gland development	136	11	0.0615595569564454	1
GO:0004521	MF	endoribonuclease activity	62	5	0.0616027748959147	1
GO:0042982	BP	amyloid precursor protein metabolic process	68	6	0.0617021280525812	1
GO:1905642	BP	negative regulation of DNA methylation	2	1	0.0617794351426432	1
GO:0048863	BP	stem cell differentiation	259	18	0.0618338952700651	1
GO:0001841	BP	neural tube formation	104	9	0.0619352901947493	1
GO:0048532	BP	anatomical structure arrangement	16	3	0.0619593074707761	1
GO:1903076	BP	regulation of protein localization to plasma membrane	98	8	0.0619778929396385	1
GO:0032419	CC	extrinsic component of lysosome membrane	1	1	0.0621256350774057	1
GO:1902586	BP	multi-organism intercellular transport	1	1	0.0621256350774057	1
GO:1902895	BP	positive regulation of pri-miRNA transcription by RNA polymerase II	39	5	0.0621565583165204	1
GO:0004483	MF	mRNA (nucleoside-2'-O-)-methyltransferase activity	2	1	0.062243007377355	1
GO:0036451	BP	cap mRNA methylation	2	1	0.062243007377355	1
GO:0097309	BP	cap1 mRNA methylation	2	1	0.062243007377355	1
GO:0050932	BP	regulation of pigment cell differentiation	8	2	0.0624082169879578	1
GO:0045892	BP	negative regulation of transcription	DNA-templated	1220	64	0.0625856374107515	1
GO:0045646	BP	regulation of erythrocyte differentiation	47	5	0.0626684546188065	1
GO:0043565	MF	sequence-specific DNA binding	1575	77	0.0626890226862124	1
GO:0051208	BP	sequestering of calcium ion	121	9	0.0628494656750764	1
GO:0051491	BP	positive regulation of filopodium assembly	28	4	0.0628729354024849	1
GO:0031161	BP	phosphatidylinositol catabolic process	1	1	0.0629116813550748	1
GO:0061003	BP	positive regulation of dendritic spine morphogenesis	18	3	0.0630321148369792	1
GO:0018401	BP	peptidyl-proline hydroxylation to 4-hydroxy-L-proline	10	2	0.0631432525715139	1
GO:0045340	MF	mercury ion binding	2	1	0.0632372341961404	1
GO:0048561	BP	establishment of animal organ orientation	1	1	0.0632380825832713	1
GO:1904376	BP	negative regulation of protein localization to cell periphery	25	3	0.0632668838921247	1
GO:0018733	MF	3	4-dihydrocoumarin hydrolase activity	1	1	0.0633375131690296	1
GO:0046226	BP	coumarin catabolic process	1	1	0.0633375131690296	1
GO:0046271	BP	phenylpropanoid catabolic process	1	1	0.0633375131690296	1
GO:1905097	BP	regulation of guanyl-nucleotide exchange factor activity	8	2	0.0633807535985138	1
GO:0060251	BP	regulation of glial cell proliferation	33	4	0.0636458687867585	1
GO:0030235	MF	nitric-oxide synthase regulator activity	7	2	0.0636492134443741	1
GO:0051702	BP	interaction with symbiont	86	6	0.0636970006600548	1
GO:0005139	MF	interleukin-7 receptor binding	2	1	0.0637166384493324	1
GO:0008283	BP	cell population proliferation	1920	91	0.0637897339005667	1
GO:0047498	MF	calcium-dependent phospholipase A2 activity	16	2	0.0638189853765706	1
GO:0016331	BP	morphogenesis of embryonic epithelium	148	12	0.063872202737617	1
GO:0060218	BP	hematopoietic stem cell differentiation	85	7	0.0639040316345088	1
GO:1900224	BP	positive regulation of nodal signaling pathway involved in determination of lateral mesoderm left/right asymmetry	2	1	0.0639059704288999	1
GO:0048522	BP	positive regulation of cellular process	5313	236	0.0639216202225321	1
GO:0051968	BP	positive regulation of synaptic transmission	glutamatergic	31	4	0.0639233575021532	1
GO:0019858	BP	cytosine metabolic process	2	1	0.0639426085866276	1
GO:0045109	BP	intermediate filament organization	24	3	0.0639650221989242	1
GO:0006875	BP	cellular metal ion homeostasis	550	29	0.0640015499457539	1
GO:0021941	BP	negative regulation of cerebellar granule cell precursor proliferation	2	1	0.0640026511273415	1
GO:0098894	CC	extrinsic component of presynaptic endocytic zone membrane	2	1	0.0640596408440496	1
GO:0035722	BP	interleukin-12-mediated signaling pathway	44	4	0.0640958742442421	1
GO:0031998	BP	regulation of fatty acid beta-oxidation	19	3	0.0641330754624661	1
GO:1905037	BP	autophagosome organization	94	7	0.064190924812701	1
GO:0031780	MF	corticotropin hormone receptor binding	2	1	0.064234975506956	1
GO:0031783	MF	type 5 melanocortin receptor binding	2	1	0.064234975506956	1
GO:0106027	BP	neuron projection organization	84	8	0.0646015750746159	1
GO:0071484	BP	cellular response to light intensity	2	1	0.0646532451552851	1
GO:0006457	BP	protein folding	212	12	0.0648464811966094	1
GO:0050847	BP	progesterone receptor signaling pathway	9	2	0.0650985994067233	1
GO:0086014	BP	atrial cardiac muscle cell action potential	18	3	0.0651289446899002	1
GO:0086026	BP	atrial cardiac muscle cell to AV node cell signaling	18	3	0.0651289446899002	1
GO:0086066	BP	atrial cardiac muscle cell to AV node cell communication	18	3	0.0651289446899002	1
GO:1905247	BP	positive regulation of aspartic-type peptidase activity	8	2	0.0652225466612174	1
GO:0060292	BP	long-term synaptic depression	30	4	0.0654623263275265	1
GO:0007417	BP	central nervous system development	989	57	0.0654776875803017	1
GO:1904238	BP	pericyte cell differentiation	8	2	0.0656075532395367	1
GO:0001881	BP	receptor recycling	34	4	0.0656459442728941	1
GO:0006650	BP	glycerophospholipid metabolic process	329	19	0.0657364568388934	1
GO:0016788	MF	hydrolase activity	acting on ester bonds	712	35	0.0660353802319222	1
GO:0043025	CC	neuronal cell body	498	30	0.0660583211253939	1
GO:0005791	CC	rough endoplasmic reticulum	80	6	0.0661074669307807	1
GO:0071772	BP	response to BMP	159	12	0.0661346033690434	1
GO:0071773	BP	cellular response to BMP stimulus	159	12	0.0661346033690434	1
GO:1901503	BP	ether biosynthetic process	12	2	0.0661915354267932	1
GO:0030137	CC	COPI-coated vesicle	28	3	0.0661976448246384	1
GO:0010562	BP	positive regulation of phosphorus metabolic process	1113	56	0.0662033757984088	1
GO:0045937	BP	positive regulation of phosphate metabolic process	1113	56	0.0662033757984088	1
GO:0061448	BP	connective tissue development	254	18	0.0662375894399485	1
GO:0040007	BP	growth	931	51	0.0662870176475742	1
GO:0032223	BP	negative regulation of synaptic transmission	cholinergic	1	1	0.0664316764108032	1
GO:0045212	BP	neurotransmitter receptor biosynthetic process	1	1	0.0664316764108032	1
GO:0048793	BP	pronephros development	8	2	0.0664665445530443	1
GO:0003682	MF	chromatin binding	549	31	0.0665189647008309	1
GO:0005795	CC	Golgi stack	128	9	0.0666472325292352	1
GO:0003880	MF	protein C-terminal carboxyl O-methyltransferase activity	2	1	0.0670132912684289	1
GO:0006481	BP	C-terminal protein methylation	2	1	0.0670132912684289	1
GO:0060290	BP	transdifferentiation	8	2	0.067102805067971	1
GO:1903867	BP	extraembryonic membrane development	9	2	0.0671667647110528	1
GO:0000165	BP	MAPK cascade	898	46	0.0672979591162215	1
GO:0051563	BP	smooth endoplasmic reticulum calcium ion homeostasis	2	1	0.0673527240118063	1
GO:0061723	BP	glycophagy	2	1	0.067529822374877	1
GO:0030010	BP	establishment of cell polarity	137	11	0.0678962604560608	1
GO:0030201	BP	heparan sulfate proteoglycan metabolic process	31	4	0.0679358376764558	1
GO:0070830	BP	bicellular tight junction assembly	73	6	0.0679662901935417	1
GO:0070296	BP	sarcoplasmic reticulum calcium ion transport	39	4	0.0679688218393324	1
GO:0060401	BP	cytosolic calcium ion transport	172	12	0.0680093779925554	1
GO:2000035	BP	regulation of stem cell division	10	2	0.0681890798627564	1
GO:1904266	BP	regulation of Schwann cell chemotaxis	1	1	0.0681946415827715	1
GO:1904268	BP	positive regulation of Schwann cell chemotaxis	1	1	0.0681946415827715	1
GO:1990751	BP	Schwann cell chemotaxis	1	1	0.0681946415827715	1
GO:0030513	BP	positive regulation of BMP signaling pathway	34	4	0.0683493894654761	1
GO:0050764	BP	regulation of phagocytosis	95	7	0.0685028930036376	1
GO:0010370	CC	perinucleolar chromocenter	2	1	0.0687691010628515	1
GO:1904375	BP	regulation of protein localization to cell periphery	117	9	0.0689347847767112	1
GO:0051247	BP	positive regulation of protein metabolic process	1623	77	0.0689860242241367	1
GO:2000209	BP	regulation of anoikis	24	3	0.0689897158211202	1
GO:0050832	BP	defense response to fungus	39	3	0.0690191357542547	1
GO:0046337	BP	phosphatidylethanolamine metabolic process	30	3	0.0696222492026945	1
GO:0072217	BP	negative regulation of metanephros development	8	2	0.0699593072555976	1
GO:0034680	CC	integrin alpha10-beta1 complex	2	1	0.0699827497106376	1
GO:0072571	MF	mono-ADP-D-ribose binding	1	1	0.07006592857145	1
GO:0060064	BP	Spemann organizer formation at the anterior end of the primitive streak	1	1	0.0700742653287043	1
GO:1905474	BP	canonical Wnt signaling pathway involved in stem cell proliferation	1	1	0.0700742653287043	1
GO:0007155	BP	cell adhesion	1404	72	0.0701647572440162	1
GO:0070371	BP	ERK1 and ERK2 cascade	313	18	0.0702387473794804	1
GO:2000767	BP	positive regulation of cytoplasmic translation	11	2	0.0703360784368173	1
GO:0009644	BP	response to high light intensity	2	1	0.0703809555687106	1
GO:0045665	BP	negative regulation of neuron differentiation	215	16	0.0703936920308476	1
GO:0005977	BP	glycogen metabolic process	68	6	0.0705962900188049	1
GO:0042473	BP	outer ear morphogenesis	9	2	0.0706390450176962	1
GO:1903507	BP	negative regulation of nucleic acid-templated transcription	1257	65	0.0706683769030361	1
GO:0098038	BP	non-replicative transposition	DNA-mediated	1	1	0.0707985510738227	1
GO:0060923	BP	cardiac muscle cell fate commitment	9	2	0.0711492368918399	1
GO:0051653	BP	spindle localization	50	5	0.0711578630532981	1
GO:1902679	BP	negative regulation of RNA biosynthetic process	1258	65	0.0711725448213843	1
GO:0045121	CC	membrane raft	317	20	0.0711882060372297	1
GO:0070873	BP	regulation of glycogen metabolic process	34	4	0.0712113851640317	1
GO:0018277	BP	protein deamination	1	1	0.0713471927888437	1
GO:0018242	BP	protein O-linked glycosylation via serine	10	2	0.0715874500683086	1
GO:0048667	BP	cell morphogenesis involved in neuron differentiation	572	38	0.0716413851986704	1
GO:1901624	BP	negative regulation of lymphocyte chemotaxis	3	1	0.0716820585332035	1
GO:0048538	BP	thymus development	46	5	0.0717389549844184	1
GO:0035677	BP	posterior lateral line neuromast hair cell development	1	1	0.0718874927443538	1
GO:0048881	BP	mechanosensory lateral line system development	1	1	0.0718874927443538	1
GO:0048915	BP	posterior lateral line system development	1	1	0.0718874927443538	1
GO:0048916	BP	posterior lateral line development	1	1	0.0718874927443538	1
GO:0048919	BP	posterior lateral line neuromast development	1	1	0.0718874927443538	1
GO:0048923	BP	posterior lateral line neuromast hair cell differentiation	1	1	0.0718874927443538	1
GO:0072239	BP	metanephric glomerulus vasculature development	8	2	0.0719531293096715	1
GO:0060438	BP	trachea development	18	3	0.0723624144232129	1
GO:0071349	BP	cellular response to interleukin-12	46	4	0.07236455687062	1
GO:1990837	MF	sequence-specific double-stranded DNA binding	1469	72	0.0724311244985229	1
GO:0043970	BP	histone H3-K9 acetylation	12	2	0.0725038989149522	1
GO:0051651	BP	maintenance of location in cell	206	13	0.072702952297965	1
GO:0006073	BP	cellular glucan metabolic process	69	6	0.0727609158409358	1
GO:0044042	BP	glucan metabolic process	69	6	0.0727609158409358	1
GO:0036487	MF	nitric-oxide synthase inhibitor activity	1	1	0.0728284284140039	1
GO:0098736	BP	negative regulation of the force of heart contraction	1	1	0.0728284284140039	1
GO:1903248	BP	regulation of citrulline biosynthetic process	1	1	0.0728284284140039	1
GO:1903249	BP	negative regulation of citrulline biosynthetic process	1	1	0.0728284284140039	1
GO:2000283	BP	negative regulation of cellular amino acid biosynthetic process	1	1	0.0728284284140039	1
GO:0004020	MF	adenylylsulfate kinase activity	2	1	0.0728739241167149	1
GO:0004779	MF	sulfate adenylyltransferase activity	2	1	0.0728739241167149	1
GO:0004781	MF	sulfate adenylyltransferase (ATP) activity	2	1	0.0728739241167149	1
GO:0072010	BP	glomerular epithelium development	22	3	0.0730563523500164	1
GO:0015278	MF	calcium-release channel activity	17	3	0.0731226071588488	1
GO:1905242	BP	response to 3	3'	5-triiodo-L-thyronine	2	1	0.0731710041634262	1
GO:1990174	MF	phosphodiesterase decapping endonuclease activity	2	1	0.0734043119379845	1
GO:0015911	BP	long-chain fatty acid import across plasma membrane	8	2	0.0736518129061523	1
GO:1904526	BP	regulation of microtubule binding	10	2	0.0738239056570875	1
GO:0045668	BP	negative regulation of osteoblast differentiation	51	5	0.0738574955918654	1
GO:1902459	BP	positive regulation of stem cell population maintenance	9	2	0.0740462042184063	1
GO:2000048	BP	negative regulation of cell-cell adhesion mediated by cadherin	9	2	0.0740998738672176	1
GO:0071141	CC	SMAD protein complex	9	2	0.0741335970871696	1
GO:0048534	BP	hematopoietic or lymphoid organ development	922	47	0.0742477721871325	1
GO:0021570	BP	rhombomere 4 development	2	1	0.0742707729644907	1
GO:0098857	CC	membrane microdomain	318	20	0.074352131083132	1
GO:0007492	BP	endoderm development	77	7	0.0743773345797473	1
GO:1901660	BP	calcium ion export	11	2	0.0744210722614513	1
GO:0051252	BP	regulation of RNA metabolic process	3499	156	0.074531497986787	1
GO:0004089	MF	carbonate dehydratase activity	13	2	0.074539653600864	1
GO:1905502	MF	acetyl-CoA binding	2	1	0.074662144229179	1
GO:1905371	BP	ceramide phosphoethanolamine metabolic process	2	1	0.074725175788898	1
GO:1905373	BP	ceramide phosphoethanolamine biosynthetic process	2	1	0.074725175788898	1
GO:0004081	MF	bis(5'-nucleosyl)-tetraphosphatase (asymmetrical) activity	2	1	0.0748957586100913	1
GO:0008796	MF	bis(5'-nucleosyl)-tetraphosphatase activity	2	1	0.0748957586100913	1
GO:0065002	BP	intracellular protein transmembrane transport	47	4	0.0749987940815041	1
GO:0019150	MF	D-ribulokinase activity	1	1	0.0750086843589763	1
GO:0045087	BP	innate immune response	830	36	0.0750924588138547	1
GO:0051489	BP	regulation of filopodium assembly	43	5	0.0751022087151019	1
GO:0022610	BP	biological adhesion	1410	72	0.0752070519624477	1
GO:0010718	BP	positive regulation of epithelial to mesenchymal transition	48	5	0.0752502578708352	1
GO:0090282	BP	positive regulation of transcription involved in G2/M transition of mitotic cell cycle	1	1	0.0753163833356987	1
GO:0090648	BP	response to environmental enrichment	1	1	0.0753592443662093	1
GO:0032011	BP	ARF protein signal transduction	18	3	0.0753714568539746	1
GO:0032012	BP	regulation of ARF protein signal transduction	18	3	0.0753714568539746	1
GO:0001837	BP	epithelial to mesenchymal transition	148	11	0.075557345725911	1
GO:0045821	BP	positive regulation of glycolytic process	23	3	0.0755893750795681	1
GO:0031798	MF	type 1 metabotropic glutamate receptor binding	1	1	0.0757033151228214	1
GO:0061828	CC	apical tubulobulbar complex	1	1	0.0757033151228214	1
GO:0061829	CC	basal tubulobulbar complex	1	1	0.0757033151228214	1
GO:0030509	BP	BMP signaling pathway	147	11	0.0757730184181166	1
GO:0048015	BP	phosphatidylinositol-mediated signaling	188	13	0.0757784612284019	1
GO:0005595	CC	collagen type XII trimer	1	1	0.0757810336180292	1
GO:0023014	BP	signal transduction by protein phosphorylation	907	46	0.0757842979248484	1
GO:0046997	MF	oxidoreductase activity	acting on the CH-NH group of donors	flavin as acceptor	2	1	0.0759658127682165	1
GO:0070671	BP	response to interleukin-12	47	4	0.0760234565729332	1
GO:0003941	MF	L-serine ammonia-lyase activity	3	1	0.0760664088400979	1
GO:0036402	MF	proteasome-activating ATPase activity	3	1	0.0761140696661605	1
GO:0030198	BP	extracellular matrix organization	380	24	0.0761752010232937	1
GO:0030037	BP	actin filament reorganization involved in cell cycle	1	1	0.0761801248827534	1
GO:0015378	MF	sodium:chloride symporter activity	11	2	0.0762970589307075	1
GO:0005615	CC	extracellular space	3192	128	0.0763492196341579	1
GO:0098749	BP	cerebellar neuron development	3	1	0.0763566508410564	1
GO:0007565	BP	female pregnancy	180	11	0.076413882710468	1
GO:0044788	BP	modulation by host of viral process	27	3	0.0764469229698841	1
GO:0004307	MF	ethanolaminephosphotransferase activity	3	1	0.0764570372470572	1
GO:0005388	MF	calcium transmembrane transporter activity	phosphorylative mechanism	8	2	0.0764891613634722	1
GO:0001730	MF	2'-5'-oligoadenylate synthetase activity	3	1	0.076547524433721	1
GO:0045918	BP	negative regulation of cytolysis	2	1	0.076578708454431	1
GO:0010725	BP	regulation of primitive erythrocyte differentiation	1	1	0.0767321532760257	1
GO:0035854	BP	eosinophil fate commitment	1	1	0.0767321532760257	1
GO:0070372	BP	regulation of ERK1 and ERK2 cascade	294	17	0.076751018613411	1
GO:0001838	BP	embryonic epithelial tube formation	123	10	0.0770594404376682	1
GO:0046603	BP	negative regulation of mitotic centrosome separation	1	1	0.0770773457844871	1
GO:0005128	MF	erythropoietin receptor binding	3	1	0.0771534612454544	1
GO:0097553	BP	calcium ion transmembrane import into cytosol	136	10	0.0772818722927761	1
GO:0051704	BP	multi-organism process	1024	46	0.0773599447903063	1
GO:0003165	BP	Purkinje myocyte development	2	1	0.0773986841411413	1
GO:0005600	CC	collagen type XIII trimer	1	1	0.0775511719578565	1
GO:0030936	CC	transmembrane collagen trimer	1	1	0.0775511719578565	1
GO:0061736	BP	engulfment of target by autophagosome	1	1	0.0776773120875963	1
GO:0061753	BP	substrate localization to autophagosome	1	1	0.0776773120875963	1
GO:0019219	BP	regulation of nucleobase-containing compound metabolic process	3746	165	0.0777014745219416	1
GO:0018904	BP	ether metabolic process	26	3	0.0777289767590185	1
GO:0048617	BP	embryonic foregut morphogenesis	9	2	0.0778282966922463	1
GO:0038111	BP	interleukin-7-mediated signaling pathway	26	3	0.0778623650465237	1
GO:0009097	BP	isoleucine biosynthetic process	3	1	0.0778720270779768	1
GO:0034674	CC	integrin alpha5-beta1 complex	2	1	0.0778854473639647	1
GO:1902563	BP	regulation of neutrophil activation	13	2	0.0778973842445097	1
GO:0060402	BP	calcium ion transport into cytosol	154	11	0.0779020099086318	1
GO:1902001	BP	fatty acid transmembrane transport	21	3	0.0779116132738486	1
GO:0005891	CC	voltage-gated calcium channel complex	42	5	0.0779729123299683	1
GO:1903487	BP	regulation of lactation	3	1	0.0782599036904122	1
GO:0106072	BP	negative regulation of adenylate cyclase-activating G protein-coupled receptor signaling pathway	11	2	0.0783146202123305	1
GO:0060603	BP	mammary gland duct morphogenesis	31	4	0.0784724824850933	1
GO:0044233	CC	mitochondria-associated endoplasmic reticulum membrane	14	2	0.0785356543225552	1
GO:0008955	MF	peptidoglycan glycosyltransferase activity	1	1	0.0785914760781006	1
GO:0043062	BP	extracellular structure organization	381	24	0.0787370569275423	1
GO:0072299	BP	negative regulation of metanephric glomerulus development	1	1	0.078805240663942	1
GO:0072302	BP	negative regulation of metanephric glomerular mesangial cell proliferation	1	1	0.078805240663942	1
GO:1903056	BP	regulation of melanosome organization	1	1	0.0788612341213571	1
GO:0002114	MF	interleukin-33 receptor activity	2	1	0.0788661191845112	1
GO:0019959	MF	interleukin-8 binding	3	1	0.079166226632727	1
GO:0002046	MF	opsin binding	3	1	0.0793983752654613	1
GO:0031962	MF	mineralocorticoid receptor binding	1	1	0.0794075321503298	1
GO:0061767	BP	negative regulation of lung blood pressure	1	1	0.0794075321503298	1
GO:0005850	CC	eukaryotic translation initiation factor 2 complex	3	1	0.0797108362762129	1
GO:0051424	MF	corticotropin-releasing hormone binding	2	1	0.0797340220542785	1
GO:1901379	BP	regulation of potassium ion transmembrane transport	85	7	0.0797541346826167	1
GO:1905059	MF	calcium-transporting ATPase activity involved in regulation of postsynaptic cytosolic calcium ion concentration	1	1	0.0797609380642184	1
GO:0008374	MF	O-acyltransferase activity	43	4	0.0798846031496991	1
GO:0016049	BP	cell growth	464	28	0.0800430321012326	1
GO:0051346	BP	negative regulation of hydrolase activity	437	22	0.0800860396057558	1
GO:0032989	BP	cellular component morphogenesis	765	47	0.0800984443278992	1
GO:0002686	BP	negative regulation of leukocyte migration	47	4	0.0802923880183975	1
GO:0015937	BP	coenzyme A biosynthetic process	10	2	0.0805604756866015	1
GO:0004843	MF	thiol-dependent ubiquitin-specific protease activity	82	6	0.0808172168873456	1
GO:0101005	MF	ubiquitinyl hydrolase activity	82	6	0.0808172168873456	1
GO:0071356	BP	cellular response to tumor necrosis factor	284	15	0.0808551197967387	1
GO:0043621	MF	protein self-association	56	5	0.0809011400203368	1
GO:0099103	MF	channel activator activity	3	1	0.081182476650647	1
GO:0099104	MF	potassium channel activator activity	3	1	0.081182476650647	1
GO:0043021	MF	ribonucleoprotein complex binding	123	8	0.0812350436800562	1
GO:0004142	MF	diacylglycerol cholinephosphotransferase activity	3	1	0.0812871938131349	1
GO:0071678	BP	olfactory bulb axon guidance	1	1	0.0812956462289721	1
GO:0003990	MF	acetylcholinesterase activity	2	1	0.0813174288073163	1
GO:0034770	BP	histone H4-K20 methylation	10	2	0.0814418403463237	1
GO:0003178	BP	coronary sinus valve development	1	1	0.0814876448537258	1
GO:0003182	BP	coronary sinus valve morphogenesis	1	1	0.0814876448537258	1
GO:0003270	BP	Notch signaling pathway involved in regulation of secondary heart field cardioblast proliferation	1	1	0.0814876448537258	1
GO:0060843	BP	venous endothelial cell differentiation	1	1	0.0814876448537258	1
GO:1904799	BP	regulation of neuron remodeling	1	1	0.0815079201041879	1
GO:1904800	BP	negative regulation of neuron remodeling	1	1	0.0815079201041879	1
GO:2000173	BP	negative regulation of branching morphogenesis of a nerve	1	1	0.0815079201041879	1
GO:0003026	BP	regulation of systemic arterial blood pressure by aortic arch baroreceptor feedback	1	1	0.0815891450669868	1
GO:0072011	BP	glomerular endothelium development	3	1	0.0815945661508435	1
GO:0007221	BP	positive regulation of transcription of Notch receptor target	18	3	0.0816817993861054	1
GO:0019730	BP	antimicrobial humoral response	116	6	0.0817135825783198	1
GO:0015056	MF	corticotrophin-releasing factor receptor activity	2	1	0.0817767238647962	1
GO:0043404	MF	corticotropin-releasing hormone receptor activity	2	1	0.0817767238647962	1
GO:0048597	BP	post-embryonic camera-type eye morphogenesis	3	1	0.0818355809687827	1
GO:0043455	BP	regulation of secondary metabolic process	11	2	0.0818931031708886	1
GO:0048021	BP	regulation of melanin biosynthetic process	11	2	0.0818931031708886	1
GO:1900376	BP	regulation of secondary metabolite biosynthetic process	11	2	0.0818931031708886	1
GO:0061314	BP	Notch signaling involved in heart development	11	2	0.0819063821231254	1
GO:1990031	CC	pinceau fiber	1	1	0.0819468421624714	1
GO:0010717	BP	regulation of epithelial to mesenchymal transition	97	8	0.0820314633329744	1
GO:0000010	MF	trans-hexaprenyltranstransferase activity	2	1	0.0822557375951057	1
GO:0050347	MF	trans-octaprenyltranstransferase activity	2	1	0.0822557375951057	1
GO:0062029	BP	positive regulation of stress granule assembly	2	1	0.082268154634004	1
GO:0090527	BP	actin filament reorganization	9	2	0.082273584012155	1
GO:0005089	MF	Rho guanyl-nucleotide exchange factor activity	54	6	0.0822920651571858	1
GO:0048817	BP	negative regulation of hair follicle maturation	2	1	0.0824179500840996	1
GO:0004736	MF	pyruvate carboxylase activity	1	1	0.0824540193793155	1
GO:0003409	BP	optic cup structural organization	1	1	0.0825061909269488	1
GO:0021993	BP	initiation of neural tube closure	1	1	0.0825166345171552	1
GO:0070887	BP	cellular response to chemical stimulus	3186	140	0.0825315799710262	1
GO:0014813	BP	skeletal muscle satellite cell commitment	1	1	0.0826736593306145	1
GO:0005308	MF	creatine transmembrane transporter activity	2	1	0.0827009643369819	1
GO:0015881	BP	creatine transmembrane transport	2	1	0.0827009643369819	1
GO:0048854	BP	brain morphogenesis	34	4	0.0827355688047974	1
GO:0032444	CC	activin responsive factor complex	3	1	0.0827980649201778	1
GO:0021508	BP	floor plate formation	1	1	0.0828630072334746	1
GO:1905162	BP	regulation of phagosome maturation	3	1	0.0832258262468312	1
GO:0021813	BP	cell-cell adhesion involved in neuronal-glial interactions involved in cerebral cortex radial glia guided migration	1	1	0.0832340521825429	1
GO:0072507	BP	divalent inorganic cation homeostasis	486	26	0.0833282793454614	1
GO:0021936	BP	regulation of cerebellar granule cell precursor proliferation	10	2	0.0833523224674428	1
GO:0042471	BP	ear morphogenesis	121	10	0.0833864009827781	1
GO:0060072	MF	large conductance calcium-activated potassium channel activity	1	1	0.0835981287901315	1
GO:0021902	BP	commitment of neuronal cell to specific neuron type in forebrain	7	2	0.0836795318291067	1
GO:1901661	BP	quinone metabolic process	36	3	0.0838775165995184	1
GO:0004540	MF	ribonuclease activity	110	7	0.0841481287946579	1
GO:0030971	MF	receptor tyrosine kinase binding	71	6	0.0842955065338378	1
GO:0047191	MF	1-alkylglycerophosphocholine O-acyltransferase activity	1	1	0.0843370199038951	1
GO:2001246	BP	negative regulation of phosphatidylcholine biosynthetic process	1	1	0.0843370199038951	1
GO:0046426	BP	negative regulation of receptor signaling pathway via JAK-STAT	25	3	0.0844964775812303	1
GO:0098794	CC	postsynapse	606	37	0.0845377820396725	1
GO:0060341	BP	regulation of cellular localization	967	50	0.0846230499689666	1
GO:0007411	BP	axon guidance	276	21	0.0847283807808298	1
GO:0007409	BP	axonogenesis	459	31	0.0848364381538889	1
GO:0005158	MF	insulin receptor binding	22	3	0.0848860543858435	1
GO:0030162	BP	regulation of proteolysis	707	34	0.0849998015429594	1
GO:0045602	BP	negative regulation of endothelial cell differentiation	13	2	0.0850937509346633	1
GO:0031340	BP	positive regulation of vesicle fusion	11	2	0.0850946290111208	1
GO:0060997	BP	dendritic spine morphogenesis	55	6	0.0853058908555602	1
GO:0072181	BP	mesonephric duct formation	2	1	0.0853959861709154	1
GO:0034667	CC	integrin alpha3-beta1 complex	2	1	0.0855869373712104	1
GO:0036090	BP	cleavage furrow ingression	2	1	0.0856261363479214	1
GO:1902824	BP	positive regulation of late endosome to lysosome transport	2	1	0.0856335292229883	1
GO:1903337	BP	positive regulation of vacuolar transport	2	1	0.0856335292229883	1
GO:0007033	BP	vacuole organization	163	10	0.0858084128644334	1
GO:0034237	MF	protein kinase A regulatory subunit binding	25	3	0.0858697527990353	1
GO:0034595	MF	phosphatidylinositol phosphate 5-phosphatase activity	11	2	0.0858733779785122	1
GO:0010907	BP	positive regulation of glucose metabolic process	41	4	0.0858932358721588	1
GO:0099512	CC	supramolecular fiber	929	45	0.0860727875083484	1
GO:0048017	BP	inositol lipid-mediated signaling	192	13	0.0862467142506328	1
GO:1903565	BP	negative regulation of protein localization to cilium	2	1	0.0863564545540589	1
GO:0005096	MF	GTPase activator activity	249	16	0.0863760492332452	1
GO:0003292	BP	cardiac septum cell differentiation	2	1	0.0864287026628518	1
GO:0060922	BP	atrioventricular node cell differentiation	2	1	0.0864287026628518	1
GO:0060928	BP	atrioventricular node cell development	2	1	0.0864287026628518	1
GO:0072560	BP	type B pancreatic cell maturation	2	1	0.0864491291822565	1
GO:0046328	BP	regulation of JNK cascade	177	12	0.0865470643996334	1
GO:0034379	BP	very-low-density lipoprotein particle assembly	13	2	0.0867135306943449	1
GO:0000122	BP	negative regulation of transcription by RNA polymerase II	868	48	0.0867829498820967	1
GO:0005046	MF	KDEL sequence binding	3	1	0.0868791144493157	1
GO:0070341	BP	fat cell proliferation	9	2	0.0871062169942476	1
GO:0070344	BP	regulation of fat cell proliferation	9	2	0.0871062169942476	1
GO:0034350	BP	regulation of glial cell apoptotic process	9	2	0.0871347894544098	1
GO:0009798	BP	axis specification	82	7	0.0871456585890422	1
GO:0039020	BP	pronephric nephron tubule development	2	1	0.0872613946939697	1
GO:0072114	BP	pronephros morphogenesis	2	1	0.0872613946939697	1
GO:0098989	BP	NMDA selective glutamate receptor signaling pathway	3	1	0.0872885684949514	1
GO:0150147	BP	cell-cell junction disassembly	3	1	0.0873237118570092	1
GO:0042284	MF	sphingolipid delta-4 desaturase activity	2	1	0.0874339116304896	1
GO:0002072	BP	optic cup morphogenesis involved in camera-type eye development	8	2	0.0875160625948967	1
GO:0046839	BP	phospholipid dephosphorylation	41	4	0.0876321954825455	1
GO:2001269	BP	positive regulation of cysteine-type endopeptidase activity involved in apoptotic signaling pathway	11	2	0.0876456667380949	1
GO:0001919	BP	regulation of receptor recycling	23	3	0.0877645617995289	1
GO:0031103	BP	axon regeneration	49	5	0.0878051439533834	1
GO:0001738	BP	morphogenesis of a polarized epithelium	138	10	0.0878395266031007	1
GO:0097485	BP	neuron projection guidance	277	21	0.0878940777733287	1
GO:0010171	BP	body morphogenesis	46	5	0.0879241499521593	1
GO:2000047	BP	regulation of cell-cell adhesion mediated by cadherin	20	3	0.0879727035322352	1
GO:0003342	BP	proepicardium development	2	1	0.0880361304205308	1
GO:0003343	BP	septum transversum development	2	1	0.0880361304205308	1
GO:0036501	CC	UFD1-NPL4 complex	2	1	0.0880716846892377	1
GO:0006464	BP	cellular protein modification process	3926	170	0.0882169208141707	1
GO:0036211	BP	protein modification process	3926	170	0.0882169208141707	1
GO:0044111	BP	development involved in symbiotic interaction	2	1	0.0883669330887475	1
GO:0032925	BP	regulation of activin receptor signaling pathway	23	3	0.0883785063758691	1
GO:0060763	BP	mammary duct terminal end bud growth	3	1	0.0884296158562975	1
GO:0099572	CC	postsynaptic specialization	344	23	0.0884642746501988	1
GO:0019220	BP	regulation of phosphate metabolic process	1767	83	0.0884961702042795	1
GO:0043330	BP	response to exogenous dsRNA	33	3	0.088501045146051	1
GO:0072425	BP	signal transduction involved in G2 DNA damage checkpoint	13	2	0.0885690360556032	1
GO:0060324	BP	face development	46	5	0.0886717389477708	1
GO:0035282	BP	segmentation	97	8	0.0889791630884606	1
GO:0048560	BP	establishment of anatomical structure orientation	2	1	0.0894236702740381	1
GO:0043412	BP	macromolecule modification	4136	177	0.0895635334096319	1
GO:0036269	BP	swimming behavior	2	1	0.0897045376104626	1
GO:0031543	MF	peptidyl-proline dioxygenase activity	12	2	0.0897858471170838	1
GO:0034665	CC	integrin alpha1-beta1 complex	2	1	0.0898069026628107	1
GO:0038172	BP	interleukin-33-mediated signaling pathway	3	1	0.0898490009692993	1
GO:0010124	BP	phenylacetate catabolic process	2	1	0.0899214763979154	1
GO:1903169	BP	regulation of calcium ion transmembrane transport	146	10	0.0900235485653262	1
GO:0051204	BP	protein insertion into mitochondrial membrane	44	4	0.0900323963312924	1
GO:0050996	BP	positive regulation of lipid catabolic process	26	3	0.0900579278924137	1
GO:0072584	BP	caveolin-mediated endocytosis	12	2	0.0901158585763613	1
GO:0051174	BP	regulation of phosphorus metabolic process	1768	83	0.0902659460616282	1
GO:0070839	BP	divalent metal ion export	12	2	0.0903502857116904	1
GO:0007174	BP	epidermal growth factor catabolic process	2	1	0.0904988278213193	1
GO:1902991	BP	regulation of amyloid precursor protein catabolic process	40	4	0.0905359873862087	1
GO:0034377	BP	plasma lipoprotein particle assembly	31	3	0.0906261495339321	1
GO:0033089	BP	positive regulation of T cell differentiation in thymus	12	2	0.0906794133094704	1
GO:0031053	BP	primary miRNA processing	13	2	0.0907053672758782	1
GO:0010743	BP	regulation of macrophage derived foam cell differentiation	32	3	0.0907433859830294	1
GO:0038093	BP	Fc receptor signaling pathway	173	11	0.0907521607444696	1
GO:0090382	BP	phagosome maturation	46	4	0.0907907100752443	1
GO:0030177	BP	positive regulation of Wnt signaling pathway	173	12	0.0908227755622451	1
GO:0009383	MF	rRNA (cytosine-C5-)-methyltransferase activity	3	1	0.0908317365428059	1
GO:0010977	BP	negative regulation of neuron projection development	145	11	0.0911089071071282	1
GO:0001507	BP	acetylcholine catabolic process in synaptic cleft	2	1	0.0913974101529202	1
GO:0006581	BP	acetylcholine catabolic process	2	1	0.0913974101529202	1
GO:0060539	BP	diaphragm development	9	2	0.0914286715248246	1
GO:0042592	BP	homeostatic process	1864	85	0.0920387281124806	1
GO:0045165	BP	cell fate commitment	271	19	0.0920654912579927	1
GO:0048880	BP	sensory system development	384	24	0.092088183771386	1
GO:0016279	MF	protein-lysine N-methyltransferase activity	56	5	0.0921651823649959	1
GO:0008320	MF	protein transmembrane transporter activity	18	2	0.0921771126908593	1
GO:0140318	MF	protein transporter activity	18	2	0.0921771126908593	1
GO:0030097	BP	hemopoiesis	881	44	0.0921808678896079	1
GO:0009416	BP	response to light stimulus	300	17	0.093018452591231	1
GO:0006816	BP	calcium ion transport	408	23	0.0932596230393229	1
GO:1905912	BP	regulation of calcium ion export across plasma membrane	4	1	0.0933326692240493	1
GO:1990923	CC	PET complex	3	1	0.093475549539008	1
GO:0099081	CC	supramolecular polymer	935	45	0.0938438259469002	1
GO:0002731	BP	negative regulation of dendritic cell cytokine production	2	1	0.0938479456364443	1
GO:0033241	BP	regulation of cellular amine catabolic process	2	1	0.0938715642795366	1
GO:0033242	BP	negative regulation of cellular amine catabolic process	2	1	0.0938715642795366	1
GO:1900081	BP	regulation of arginine catabolic process	2	1	0.0938715642795366	1
GO:1900082	BP	negative regulation of arginine catabolic process	2	1	0.0938715642795366	1
GO:0000958	BP	mitochondrial mRNA catabolic process	3	1	0.093997348021676	1
GO:0070410	MF	co-SMAD binding	9	2	0.0943796083273515	1
GO:0051012	BP	microtubule sliding	2	1	0.0944133548742951	1
GO:0015450	MF	P-P-bond-hydrolysis-driven protein transmembrane transporter activity	4	1	0.0946061065001451	1
GO:0070841	BP	inclusion body assembly	23	3	0.0946804378256936	1
GO:0047655	MF	allyl-alcohol dehydrogenase activity	4	1	0.0947017857911317	1
GO:2000619	BP	negative regulation of histone H4-K16 acetylation	3	1	0.0947075242216074	1
GO:0090026	BP	positive regulation of monocyte chemotaxis	17	2	0.0950707221315308	1
GO:0034374	BP	low-density lipoprotein particle remodeling	16	2	0.0950730977145028	1
GO:0072570	MF	ADP-D-ribose binding	2	1	0.0953926204412515	1
GO:0070084	BP	protein initiator methionine removal	3	1	0.0955045139175738	1
GO:0043507	BP	positive regulation of JUN kinase activity	70	6	0.0956526359708549	1
GO:0070194	BP	synaptonemal complex disassembly	2	1	0.0956601068878635	1
GO:1903860	BP	negative regulation of dendrite extension	2	1	0.0957163400011534	1
GO:0050663	BP	cytokine secretion	67	5	0.0957597903373106	1
GO:0043269	BP	regulation of ion transport	668	36	0.0958022961032242	1
GO:0046620	BP	regulation of organ growth	105	8	0.0958166896271519	1
GO:1902959	BP	regulation of aspartic-type endopeptidase activity involved in amyloid precursor protein catabolic process	9	2	0.0959079150919822	1
GO:0016278	MF	lysine N-methyltransferase activity	57	5	0.0959951645020805	1
GO:0032885	BP	regulation of polysaccharide biosynthetic process	37	4	0.0961479950735842	1
GO:0032872	BP	regulation of stress-activated MAPK cascade	226	14	0.0963630729120044	1
GO:0071874	BP	cellular response to norepinephrine stimulus	2	1	0.0963775146487359	1
GO:0050801	BP	ion homeostasis	777	38	0.0963842571065475	1
GO:0071108	BP	protein K48-linked deubiquitination	32	3	0.0964010888497729	1
GO:1903900	BP	regulation of viral life cycle	150	9	0.0964063804150178	1
GO:0004063	MF	aryldialkylphosphatase activity	2	1	0.0964628702967796	1
GO:0051124	BP	synaptic growth at neuromuscular junction	10	2	0.0964718044171127	1
GO:0003350	BP	pulmonary myocardium development	2	1	0.0965246931352116	1
GO:0003334	BP	keratinocyte development	12	2	0.0969249559587332	1
GO:1901016	BP	regulation of potassium ion transmembrane transporter activity	62	5	0.0970024009853096	1
GO:0002774	BP	Fc receptor mediated inhibitory signaling pathway	3	1	0.0971882858779611	1
GO:0043335	BP	protein unfolding	3	1	0.0973172069621087	1
GO:0031399	BP	regulation of protein modification process	1808	84	0.0973411709350415	1
GO:0040011	BP	locomotion	1845	89	0.0974028863958222	1
GO:0045934	BP	negative regulation of nucleobase-containing compound metabolic process	1439	71	0.097482304265352	1
GO:0002081	CC	outer acrosomal membrane	4	1	0.097561246575661	1
GO:0010676	BP	positive regulation of cellular carbohydrate metabolic process	60	5	0.0975903193890047	1
GO:0070588	BP	calcium ion transmembrane transport	299	18	0.0978814146400072	1
GO:0000422	BP	autophagy of mitochondrion	74	6	0.0978828236113283	1
GO:0061726	BP	mitochondrion disassembly	74	6	0.0978828236113283	1
GO:0021568	BP	rhombomere 2 development	2	1	0.0979715843825306	1
GO:0048813	BP	dendrite morphogenesis	133	11	0.0980470637026867	1
GO:0046365	BP	monosaccharide catabolic process	63	5	0.0981000206697511	1
GO:0034687	CC	integrin alphaL-beta2 complex	2	1	0.0983863701665737	1
GO:0044827	BP	modulation by host of viral genome replication	15	2	0.0983948053817002	1
GO:0071300	BP	cellular response to retinoic acid	67	6	0.0984230276718577	1
GO:0072209	BP	metanephric mesangial cell differentiation	2	1	0.0984511646518828	1
GO:0072254	BP	metanephric glomerular mesangial cell differentiation	2	1	0.0984511646518828	1
GO:0019058	BP	viral life cycle	327	17	0.0985934480603382	1
GO:0050766	BP	positive regulation of phagocytosis	66	5	0.0987401630995975	1
GO:0018410	BP	C-terminal protein amino acid modification	13	2	0.0987804537451241	1
GO:0090100	BP	positive regulation of transmembrane receptor protein serine/threonine kinase signaling pathway	107	8	0.0989123860495109	1
GO:0031727	MF	CCR2 chemokine receptor binding	6	1	0.0989223188627126	1
GO:0006646	BP	phosphatidylethanolamine biosynthetic process	15	2	0.0990925758869301	1
GO:0060070	BP	canonical Wnt signaling pathway	324	20	0.099213512485833	1
GO:0035066	BP	positive regulation of histone acetylation	28	3	0.0992294411251749	1
GO:0033512	BP	L-lysine catabolic process to acetyl-CoA via saccharopine	3	1	0.0992587630230267	1
GO:0019826	MF	oxygen sensor activity	3	1	0.0996595380541353	1
GO:0034704	CC	calcium channel complex	65	6	0.0997036060441199	1
GO:0043616	BP	keratinocyte proliferation	49	4	0.0998314145647371	1
GO:0031593	MF	polyubiquitin modification-dependent protein binding	47	4	0.0998566806678666	1
GO:0051873	BP	killing by host of symbiont cells	24	2	0.0999512215956879	1
GO:0036149	BP	phosphatidylinositol acyl-chain remodeling	18	2	0.100037328296036	1
GO:0050715	BP	positive regulation of cytokine secretion	32	3	0.100044370093748	1
GO:0072175	BP	epithelial tube formation	131	10	0.100389230778533	1
GO:0070536	BP	protein K63-linked deubiquitination	32	3	0.100478476403177	1
GO:0046824	BP	positive regulation of nucleocytoplasmic transport	63	5	0.100498405063925	1
GO:0016641	MF	oxidoreductase activity	acting on the CH-NH2 group of donors	oxygen as acceptor	14	2	0.100500368133326	1
GO:0031753	MF	endothelial differentiation G protein-coupled receptor binding	2	1	0.100543923216363	1
GO:0031755	MF	Edg-2 lysophosphatidic acid receptor binding	2	1	0.100543923216363	1
GO:1902962	BP	regulation of metalloendopeptidase activity involved in amyloid precursor protein catabolic process	2	1	0.100603459165799	1
GO:1902963	BP	negative regulation of metalloendopeptidase activity involved in amyloid precursor protein catabolic process	2	1	0.100603459165799	1
GO:0071695	BP	anatomical structure maturation	228	14	0.100627188023548	1
GO:0051279	BP	regulation of release of sequestered calcium ion into cytosol	79	6	0.100758345134336	1
GO:0045060	BP	negative thymic T cell selection	11	2	0.100806764698152	1
GO:0003690	MF	double-stranded DNA binding	1554	74	0.100817854414142	1
GO:0060323	BP	head morphogenesis	34	4	0.100968168975229	1
GO:0051057	BP	positive regulation of small GTPase mediated signal transduction	71	6	0.10100601573071	1
GO:0021577	BP	hindbrain structural organization	2	1	0.101050532552663	1
GO:0021589	BP	cerebellum structural organization	2	1	0.101050532552663	1
GO:0030165	MF	PDZ domain binding	83	7	0.10119735979823	1
GO:0030158	MF	protein xylosyltransferase activity	2	1	0.101199161058731	1
GO:0044804	BP	autophagy of nucleus	13	2	0.101468078398575	1
GO:0007212	BP	dopamine receptor signaling pathway	40	4	0.101496524759931	1
GO:0060198	CC	clathrin-sculpted vesicle	12	2	0.101553966905176	1
GO:0030663	CC	COPI-coated vesicle membrane	18	2	0.101633080337362	1
GO:0060353	BP	regulation of cell adhesion molecule production	15	2	0.101653856609288	1
GO:0035521	BP	monoubiquitinated histone deubiquitination	4	1	0.101889192912977	1
GO:0035522	BP	monoubiquitinated histone H2A deubiquitination	4	1	0.101889192912977	1
GO:1905056	MF	calcium-transporting ATPase activity involved in regulation of presynaptic cytosolic calcium ion concentration	2	1	0.101910194025401	1
GO:0050673	BP	epithelial cell proliferation	431	23	0.102077060978613	1
GO:0042268	BP	regulation of cytolysis	3	1	0.102115667620555	1
GO:0070563	BP	negative regulation of vitamin D receptor signaling pathway	2	1	0.102265495012003	1
GO:0008134	MF	transcription factor binding	609	34	0.102303717379776	1
GO:0048873	BP	homeostasis of number of cells within a tissue	27	3	0.102366733724893	1
GO:0048308	BP	organelle inheritance	15	2	0.10240785323267	1
GO:0048313	BP	Golgi inheritance	15	2	0.10240785323267	1
GO:1905476	BP	negative regulation of protein localization to membrane	30	3	0.102436026608393	1
GO:0008047	MF	enzyme activator activity	488	26	0.102438188032712	1
GO:1903028	BP	positive regulation of opsonization	2	1	0.102542382795712	1
GO:0005102	MF	signaling receptor binding	1475	68	0.102545896717583	1
GO:2001034	BP	positive regulation of double-strand break repair via nonhomologous end joining	15	2	0.10275264458713	1
GO:1903899	BP	positive regulation of PERK-mediated unfolded protein response	4	1	0.102758049059256	1
GO:0004721	MF	phosphoprotein phosphatase activity	172	11	0.102981175696258	1
GO:0002038	BP	positive regulation of L-glutamate import across plasma membrane	3	1	0.103059489288602	1
GO:0060996	BP	dendritic spine development	89	8	0.103224566175099	1
GO:0021904	BP	dorsal/ventral neural tube patterning	24	3	0.103241223679829	1
GO:0046856	BP	phosphatidylinositol dephosphorylation	27	3	0.103348211404733	1
GO:0001783	BP	B cell apoptotic process	25	3	0.10345418571516	1
GO:1990478	BP	response to ultrasound	2	1	0.103493474104014	1
GO:0036409	CC	histone H3-K14 acetyltransferase complex	2	1	0.103537843081502	1
GO:0097324	BP	melanocyte migration	2	1	0.103715353086231	1
GO:0090084	BP	negative regulation of inclusion body assembly	11	2	0.10375658311738	1
GO:0071963	BP	establishment or maintenance of cell polarity regulating cell shape	2	1	0.103786591490818	1
GO:0003211	BP	cardiac ventricle formation	10	2	0.10379313147599	1
GO:0048518	BP	positive regulation of biological process	5851	253	0.103850821510402	1
GO:0009628	BP	response to abiotic stimulus	1182	56	0.103875328526895	1
GO:0015373	MF	anion:sodium symporter activity	14	2	0.103964312859657	1
GO:0000904	BP	cell morphogenesis involved in differentiation	714	44	0.104133745344128	1
GO:1990839	BP	response to endothelin	2	1	0.104202166518451	1
GO:0006996	BP	organelle organization	3792	162	0.104317863904072	1
GO:0034329	BP	cell junction assembly	410	26	0.104361619349426	1
GO:0090119	BP	vesicle-mediated cholesterol transport	2	1	0.104866611994015	1
GO:0050816	MF	phosphothreonine residue binding	3	1	0.104881929533601	1
GO:0001878	BP	response to yeast	4	1	0.104904168929804	1
GO:0005784	CC	Sec61 translocon complex	4	1	0.105014970844497	1
GO:0035148	BP	tube formation	147	11	0.105073274805961	1
GO:0002903	BP	negative regulation of B cell apoptotic process	13	2	0.105078781394362	1
GO:0001675	BP	acrosome assembly	18	2	0.105095280851291	1
GO:0006933	BP	negative regulation of cell adhesion involved in substrate-bound cell migration	4	1	0.105226620819205	1
GO:0003215	BP	cardiac right ventricle morphogenesis	20	3	0.105250810577018	1
GO:0035962	BP	response to interleukin-13	4	1	0.105398991148829	1
GO:0042532	BP	negative regulation of tyrosine phosphorylation of STAT protein	15	2	0.105457294782689	1
GO:0038092	BP	nodal signaling pathway	14	2	0.105496118370744	1
GO:0004332	MF	fructose-bisphosphate aldolase activity	3	1	0.105501546905467	1
GO:0050885	BP	neuromuscular process controlling balance	51	5	0.105561496772104	1
GO:0034274	CC	Atg12-Atg5-Atg16 complex	3	1	0.105622977048825	1
GO:0060452	BP	positive regulation of cardiac muscle contraction	13	2	0.105722768811339	1
GO:0048340	BP	paraxial mesoderm morphogenesis	10	2	0.106080827517408	1
GO:0060444	BP	branching involved in mammary gland duct morphogenesis	23	3	0.106171098393035	1
GO:0045019	BP	negative regulation of nitric oxide biosynthetic process	17	2	0.106252989911938	1
GO:1904406	BP	negative regulation of nitric oxide metabolic process	17	2	0.106252989911938	1
GO:0006897	BP	endocytosis	545	29	0.106316552545517	1
GO:2000178	BP	negative regulation of neural precursor cell proliferation	22	3	0.10652944497295	1
GO:1901664	BP	regulation of NAD+ ADP-ribosyltransferase activity	3	1	0.106922184533009	1
GO:1901666	BP	positive regulation of NAD+ ADP-ribosyltransferase activity	3	1	0.106922184533009	1
GO:1904893	BP	negative regulation of receptor signaling pathway via STAT	31	3	0.107102490605621	1
GO:0008277	BP	regulation of G protein-coupled receptor signaling pathway	136	9	0.107342394417796	1
GO:0097534	BP	lymphoid lineage cell migration	2	1	0.107445040450145	1
GO:0097535	BP	lymphoid lineage cell migration into thymus	2	1	0.107445040450145	1
GO:0030943	MF	mitochondrion targeting sequence binding	4	1	0.107665845105486	1
GO:0004321	MF	fatty-acyl-CoA synthase activity	6	1	0.107934031355157	1
GO:1902748	BP	positive regulation of lens fiber cell differentiation	2	1	0.107985097015955	1
GO:1901252	BP	regulation of intracellular transport of viral material	2	1	0.108007656651779	1
GO:1901253	BP	negative regulation of intracellular transport of viral material	2	1	0.108007656651779	1
GO:0070668	BP	positive regulation of mast cell proliferation	2	1	0.108024038021375	1
GO:0052745	MF	inositol phosphate phosphatase activity	12	2	0.108109081693685	1
GO:0019072	BP	viral genome packaging	2	1	0.108243163192704	1
GO:0019074	BP	viral RNA genome packaging	2	1	0.108243163192704	1
GO:0045667	BP	regulation of osteoblast differentiation	126	9	0.108245532847189	1
GO:0031069	BP	hair follicle morphogenesis	27	3	0.10826775304315	1
GO:0001654	BP	eye development	374	23	0.108347042331509	1
GO:0045920	BP	negative regulation of exocytosis	29	3	0.108488053288729	1
GO:0004535	MF	poly(A)-specific ribonuclease activity	14	2	0.108547240094343	1
GO:0010605	BP	negative regulation of macromolecule metabolic process	3217	132	0.108569579355826	1
GO:1990927	BP	calcium ion regulated lysosome exocytosis	2	1	0.108595218692726	1
GO:0035556	BP	intracellular signal transduction	2686	122	0.108627484858718	1
GO:0042921	BP	glucocorticoid receptor signaling pathway	13	2	0.10866921451719	1
GO:0021691	BP	cerebellar Purkinje cell layer maturation	2	1	0.108720760675562	1
GO:0043297	BP	apical junction assembly	81	6	0.108754698497119	1
GO:0021767	BP	mammillary body development	2	1	0.108755022706692	1
GO:0061373	BP	mammillary axonal complex development	2	1	0.108755022706692	1
GO:0060425	BP	lung morphogenesis	52	5	0.108797257964027	1
GO:0044267	BP	cellular protein metabolic process	4982	206	0.108837743199894	1
GO:0034764	BP	positive regulation of transmembrane transport	196	12	0.108905767417904	1
GO:0060263	BP	regulation of respiratory burst	15	2	0.109058682954866	1
GO:0006898	BP	receptor-mediated endocytosis	259	15	0.109081328434573	1
GO:0030425	CC	dendrite	582	34	0.109458691722344	1
GO:0043383	BP	negative T cell selection	12	2	0.109503363604953	1
GO:0007512	BP	adult heart development	13	2	0.109505842551311	1
GO:0046811	MF	histone deacetylase inhibitor activity	2	1	0.109553589613951	1
GO:0005068	MF	transmembrane receptor protein tyrosine kinase adaptor activity	13	2	0.109571742830926	1
GO:0044338	BP	canonical Wnt signaling pathway involved in mesenchymal stem cell differentiation	2	1	0.109698263852485	1
GO:0071156	BP	regulation of cell cycle arrest	103	7	0.109710381357302	1
GO:0002689	BP	negative regulation of leukocyte chemotaxis	18	2	0.109710393891854	1
GO:0060349	BP	bone morphogenesis	93	8	0.1097789943335	1
GO:0045596	BP	negative regulation of cell differentiation	725	39	0.10985212256789	1
GO:0042733	BP	embryonic digit morphogenesis	61	6	0.109892104873059	1
GO:0008745	MF	N-acetylmuramoyl-L-alanine amidase activity	4	1	0.110055765662998	1
GO:1903506	BP	regulation of nucleic acid-templated transcription	3241	143	0.110079033976454	1
GO:0045604	BP	regulation of epidermal cell differentiation	65	5	0.110296148539248	1
GO:0051894	BP	positive regulation of focal adhesion assembly	25	3	0.110422041570396	1
GO:0070566	MF	adenylyltransferase activity	30	3	0.110478804360381	1
GO:0031716	MF	calcitonin receptor binding	2	1	0.110596007930915	1
GO:0050920	BP	regulation of chemotaxis	217	13	0.110604671527676	1
GO:0007603	BP	phototransduction	visible light	31	3	0.11063697010394	1
GO:0043186	CC	P granule	17	2	0.110744945852906	1
GO:0060293	CC	germ plasm	17	2	0.110744945852906	1
GO:0018199	BP	peptidyl-glutamine modification	4	1	0.110770051493755	1
GO:1990168	BP	protein K33-linked deubiquitination	3	1	0.110813597679826	1
GO:0043618	BP	regulation of transcription from RNA polymerase II promoter in response to stress	107	7	0.110952562194958	1
GO:0048471	CC	perinuclear region of cytoplasm	692	36	0.110957539990361	1
GO:0034587	BP	piRNA metabolic process	18	2	0.111089503525994	1
GO:1905475	BP	regulation of protein localization to membrane	185	12	0.111311227537265	1
GO:0097061	BP	dendritic spine organization	77	7	0.111382844666917	1
GO:0004594	MF	pantothenate kinase activity	3	1	0.111422033040052	1
GO:0007567	BP	parturition	14	2	0.111524038767377	1
GO:0048755	BP	branching morphogenesis of a nerve	10	2	0.111554202571477	1
GO:0031728	MF	CCR3 chemokine receptor binding	5	1	0.111585895677243	1
GO:0097447	CC	dendritic tree	584	34	0.111678637279872	1
GO:2000146	BP	negative regulation of cell motility	332	18	0.11188119937139	1
GO:1905330	BP	regulation of morphogenesis of an epithelium	172	12	0.111930161161064	1
GO:0097212	BP	lysosomal membrane organization	3	1	0.112010349290111	1
GO:0048688	BP	negative regulation of sprouting of injured axon	2	1	0.1122306443825	1
GO:0048692	BP	negative regulation of axon extension involved in regeneration	2	1	0.1122306443825	1
GO:1903237	BP	negative regulation of leukocyte tethering or rolling	4	1	0.112232900676831	1
GO:1905784	BP	regulation of anaphase-promoting complex-dependent catabolic process	3	1	0.112329739941121	1
GO:1905786	BP	positive regulation of anaphase-promoting complex-dependent catabolic process	3	1	0.112329739941121	1
GO:0070435	CC	Shc-EGFR complex	2	1	0.112376519268609	1
GO:0095500	BP	acetylcholine receptor signaling pathway	27	3	0.112382754517498	1
GO:0030225	BP	macrophage differentiation	45	4	0.112450703613118	1
GO:0051205	BP	protein insertion into membrane	63	5	0.112588360959691	1
GO:0051253	BP	negative regulation of RNA metabolic process	1348	67	0.112602509774561	1
GO:0060032	BP	notochord regression	2	1	0.112635859290312	1
GO:0090151	BP	establishment of protein localization to mitochondrial membrane	48	4	0.112717353718528	1
GO:0034668	CC	integrin alpha4-beta1 complex	3	1	0.112808869468337	1
GO:0072301	BP	regulation of metanephric glomerular mesangial cell proliferation	2	1	0.113144334353055	1
GO:1903589	BP	positive regulation of blood vessel endothelial cell proliferation involved in sprouting angiogenesis	20	2	0.113547311854858	1
GO:0031327	BP	negative regulation of cellular biosynthetic process	1587	75	0.113646693269746	1
GO:0050653	BP	chondroitin sulfate proteoglycan biosynthetic process	polysaccharide chain biosynthetic process	2	1	0.113769611735266	1
GO:2001141	BP	regulation of RNA biosynthetic process	3245	143	0.113774217380841	1
GO:0008934	MF	inositol monophosphate 1-phosphatase activity	3	1	0.113946992129703	1
GO:0052832	MF	inositol monophosphate 3-phosphatase activity	3	1	0.113946992129703	1
GO:0052833	MF	inositol monophosphate 4-phosphatase activity	3	1	0.113946992129703	1
GO:0052834	MF	inositol monophosphate phosphatase activity	3	1	0.113946992129703	1
GO:0000117	BP	regulation of transcription involved in G2/M transition of mitotic cell cycle	2	1	0.113977660481549	1
GO:0035517	CC	PR-DUB complex	4	1	0.114250137259527	1
GO:0005047	MF	signal recognition particle binding	4	1	0.114319387292045	1
GO:0005790	CC	smooth endoplasmic reticulum	31	3	0.114347473210277	1
GO:0003252	BP	negative regulation of cell proliferation involved in heart valve morphogenesis	2	1	0.114460122377826	1
GO:0060677	BP	ureteric bud elongation	9	2	0.114773485394378	1
GO:0070966	BP	nuclear-transcribed mRNA catabolic process	no-go decay	4	1	0.114812164998997	1
GO:0061307	BP	cardiac neural crest cell differentiation involved in heart development	11	2	0.114899975501132	1
GO:0061308	BP	cardiac neural crest cell development involved in heart development	11	2	0.114899975501132	1
GO:0060932	BP	His-Purkinje system cell differentiation	2	1	0.11508698888603	1
GO:0036335	BP	intestinal stem cell homeostasis	3	1	0.115210255463387	1
GO:0150063	BP	visual system development	378	23	0.11530301105412	1
GO:0004104	MF	cholinesterase activity	3	1	0.115366299112595	1
GO:0006744	BP	ubiquinone biosynthetic process	18	2	0.115524152662008	1
GO:1901663	BP	quinone biosynthetic process	18	2	0.115524152662008	1
GO:0000103	BP	sulfate assimilation	3	1	0.11563463413969	1
GO:0006644	BP	phospholipid metabolic process	440	23	0.115814868377858	1
GO:0016222	CC	procollagen-proline 4-dioxygenase complex	2	1	0.116189596224539	1
GO:0004735	MF	pyrroline-5-carboxylate reductase activity	4	1	0.116305908492399	1
GO:0034681	CC	integrin alpha11-beta1 complex	2	1	0.116436391980884	1
GO:0017095	MF	heparan sulfate 6-O-sulfotransferase activity	2	1	0.116598556296285	1
GO:0035295	BP	tube development	1093	56	0.11662155719729	1
GO:0055015	BP	ventricular cardiac muscle cell development	12	2	0.116707146394539	1
GO:0044224	CC	juxtaparanode region of axon	10	2	0.116735938543575	1
GO:0022884	MF	macromolecule transmembrane transporter activity	20	2	0.116779425369345	1
GO:0061760	BP	antifungal innate immune response	7	1	0.11689771980421	1
GO:0001227	MF	DNA-binding transcription repressor activity	RNA polymerase II-specific	318	19	0.116923626229845	1
GO:0042054	MF	histone methyltransferase activity	56	5	0.117140727079776	1
GO:0070868	BP	heterochromatin organization involved in chromatin silencing	4	1	0.11724854852615	1
GO:0150007	BP	clathrin-dependent synaptic vesicle endocytosis	3	1	0.117261146075322	1
GO:1903351	BP	cellular response to dopamine	86	6	0.117337853318401	1
GO:0042256	BP	mature ribosome assembly	4	1	0.117342691136216	1
GO:0040020	BP	regulation of meiotic nuclear division	32	3	0.117519291587704	1
GO:0008242	MF	omega peptidase activity	91	6	0.117583129333429	1
GO:0033505	BP	floor plate morphogenesis	2	1	0.117654770983446	1
GO:1904338	BP	regulation of dopaminergic neuron differentiation	10	2	0.117717307296886	1
GO:0032227	BP	negative regulation of synaptic transmission	dopaminergic	3	1	0.11780863005177	1
GO:0071478	BP	cellular response to radiation	175	10	0.117904689263464	1
GO:0060903	BP	positive regulation of meiosis I	4	1	0.11802602361809	1
GO:0046822	BP	regulation of nucleocytoplasmic transport	107	7	0.118039215309157	1
GO:0046330	BP	positive regulation of JNK cascade	131	9	0.11811927210804	1
GO:0034140	BP	negative regulation of toll-like receptor 3 signaling pathway	3	1	0.118794171687451	1
GO:0032912	BP	negative regulation of transforming growth factor beta2 production	2	1	0.118850396414067	1
GO:0061032	BP	visceral serous pericardium development	2	1	0.118865951626566	1
GO:0010880	BP	regulation of release of sequestered calcium ion into cytosol by sarcoplasmic reticulum	30	3	0.118933759442291	1
GO:0060352	BP	cell adhesion molecule production	17	2	0.118975417765877	1
GO:1905245	BP	regulation of aspartic-type peptidase activity	11	2	0.118992524280137	1
GO:0030369	MF	ICAM-3 receptor activity	3	1	0.119088389834943	1
GO:0002176	BP	male germ cell proliferation	5	1	0.119236130463888	1
GO:0036093	BP	germ cell proliferation	5	1	0.119236130463888	1
GO:0072132	BP	mesenchyme morphogenesis	52	5	0.11923960261618	1
GO:0001767	BP	establishment of lymphocyte polarity	13	2	0.119269558953059	1
GO:0002682	BP	regulation of immune system process	1441	62	0.119278068186579	1
GO:0042327	BP	positive regulation of phosphorylation	1046	51	0.119452988418087	1
GO:0016434	MF	rRNA (cytosine) methyltransferase activity	4	1	0.119567320395298	1
GO:0019511	BP	peptidyl-proline hydroxylation	15	2	0.119588662245891	1
GO:0008191	MF	metalloendopeptidase inhibitor activity	15	2	0.119761936618739	1
GO:0045495	CC	pole plasm	18	2	0.120087105609486	1
GO:0033077	BP	T cell differentiation in thymus	74	6	0.120098147883362	1
GO:0060055	BP	angiogenesis involved in wound healing	29	3	0.120126794229138	1
GO:0071415	BP	cellular response to purine-containing compound	13	2	0.120180867803993	1
GO:0003169	BP	coronary vein morphogenesis	2	1	0.120309408272213	1
GO:0045145	MF	single-stranded DNA 5'-3' exodeoxyribonuclease activity	4	1	0.120344184481359	1
GO:0002071	BP	glandular epithelial cell maturation	3	1	0.120393470288688	1
GO:1901052	BP	sarcosine metabolic process	2	1	0.120541443519807	1
GO:0001217	MF	DNA-binding transcription repressor activity	319	19	0.120684276331794	1
GO:0021953	BP	central nervous system neuron differentiation	186	14	0.120704019663179	1
GO:0030325	BP	adrenal gland development	23	3	0.120757072846364	1
GO:2000758	BP	positive regulation of peptidyl-lysine acetylation	31	3	0.120993067004633	1
GO:0010522	BP	regulation of calcium ion transport into cytosol	99	7	0.120993887933463	1
GO:0005978	BP	glycogen biosynthetic process	44	4	0.121267473548006	1
GO:0009250	BP	glucan biosynthetic process	44	4	0.121267473548006	1
GO:0072534	CC	perineuronal net	2	1	0.121412851093089	1
GO:0051684	BP	maintenance of Golgi location	3	1	0.121416222159211	1
GO:0015909	BP	long-chain fatty acid transport	73	5	0.121440449256043	1
GO:0032916	BP	positive regulation of transforming growth factor beta3 production	3	1	0.121715138834979	1
GO:0016043	BP	cellular component organization	6034	258	0.121770172617337	1
GO:1903949	BP	positive regulation of atrial cardiac muscle cell action potential	2	1	0.121802402518736	1
GO:0080134	BP	regulation of response to stress	1459	64	0.121904050977753	1
GO:1903350	BP	response to dopamine	87	6	0.121969154239506	1
GO:0000720	BP	pyrimidine dimer repair by nucleotide-excision repair	4	1	0.122050660491546	1
GO:0071806	BP	protein transmembrane transport	56	4	0.122212796898396	1
GO:0034394	BP	protein localization to cell surface	64	5	0.122307550074087	1
GO:0031958	BP	corticosteroid receptor signaling pathway	14	2	0.122349703072216	1
GO:0043951	BP	negative regulation of cAMP-mediated signaling	26	3	0.122366815587443	1
GO:0043903	BP	regulation of symbiotic process	224	12	0.122371464955531	1
GO:0038095	BP	Fc-epsilon receptor signaling pathway	107	7	0.122472456273736	1
GO:0045226	BP	extracellular polysaccharide biosynthetic process	3	1	0.12247767034953	1
GO:0046379	BP	extracellular polysaccharide metabolic process	3	1	0.12247767034953	1
GO:0016477	BP	cell migration	1493	72	0.122686472011299	1
GO:0019474	BP	L-lysine catabolic process to acetyl-CoA	4	1	0.12282071234408	1
GO:0019477	BP	L-lysine catabolic process	4	1	0.12282071234408	1
GO:0046440	BP	L-lysine metabolic process	4	1	0.12282071234408	1
GO:1900006	BP	positive regulation of dendrite development	66	6	0.122841364895992	1
GO:0070667	BP	negative regulation of mast cell proliferation	3	1	0.122877580920352	1
GO:0048546	BP	digestive tract morphogenesis	49	5	0.122891991992531	1
GO:0051645	BP	Golgi localization	14	2	0.122917290990163	1
GO:0034612	BP	response to tumor necrosis factor	304	15	0.122976387643691	1
GO:0030718	BP	germ-line stem cell population maintenance	3	1	0.123178072645146	1
GO:0048701	BP	embryonic cranial skeleton morphogenesis	47	5	0.123281619563532	1
GO:0043314	BP	negative regulation of neutrophil degranulation	2	1	0.123306320944736	1
GO:0007602	BP	phototransduction	52	4	0.123350606241582	1
GO:0016796	MF	exonuclease activity	active with either ribo- or deoxyribonucleic acids and producing 5'-phosphomonoesters	56	4	0.123505163751844	1
GO:1903818	BP	positive regulation of voltage-gated potassium channel activity	16	2	0.124126108240552	1
GO:1905424	BP	regulation of Wnt-mediated midbrain dopaminergic neuron differentiation	2	1	0.12420309576912	1
GO:1905426	BP	positive regulation of Wnt-mediated midbrain dopaminergic neuron differentiation	2	1	0.12420309576912	1
GO:2000377	BP	regulation of reactive oxygen species metabolic process	185	11	0.124241512804951	1
GO:0032048	BP	cardiolipin metabolic process	16	2	0.12425674771202	1
GO:0060447	BP	bud outgrowth involved in lung branching	3	1	0.12430151437929	1
GO:0034678	CC	integrin alpha8-beta1 complex	3	1	0.124303889899145	1
GO:0014745	BP	negative regulation of muscle adaptation	12	2	0.124425698751164	1
GO:1904953	BP	Wnt signaling pathway involved in midbrain dopaminergic neuron differentiation	12	2	0.124453721358153	1
GO:0021571	BP	rhombomere 5 development	3	1	0.124530392149242	1
GO:0030889	BP	negative regulation of B cell proliferation	16	2	0.124561093122479	1
GO:0061138	BP	morphogenesis of a branching epithelium	182	13	0.12472835881817	1
GO:0002434	BP	immune complex clearance	4	1	0.124745171275756	1
GO:0052866	MF	phosphatidylinositol phosphate phosphatase activity	29	3	0.124886097352638	1
GO:0016841	MF	ammonia-lyase activity	5	1	0.125143175048689	1
GO:0018335	BP	protein succinylation	4	1	0.125257415451302	1
GO:0106077	BP	histone succinylation	4	1	0.125257415451302	1
GO:0009896	BP	positive regulation of catabolic process	431	23	0.125284389351898	1
GO:0031345	BP	negative regulation of cell projection organization	176	12	0.125302660710523	1
GO:0071008	CC	U2-type post-mRNA release spliceosomal complex	3	1	0.125313278196056	1
GO:0032880	BP	regulation of protein localization	909	45	0.125348664123912	1
GO:0016638	MF	oxidoreductase activity	acting on the CH-NH2 group of donors	17	2	0.125360593865871	1
GO:0009950	BP	dorsal/ventral axis specification	11	2	0.12549047772462	1
GO:0099243	CC	extrinsic component of synaptic membrane	12	2	0.125530917965537	1
GO:1990909	CC	Wnt signalosome	12	2	0.125662900328209	1
GO:0043204	CC	perikaryon	149	10	0.125714895879025	1
GO:0039689	BP	negative stranded viral RNA replication	3	1	0.12577619674321	1
GO:1990812	CC	growth cone filopodium	3	1	0.125801963940177	1
GO:0002029	BP	desensitization of G protein-coupled receptor signaling pathway	16	2	0.1259637449955	1
GO:0022401	BP	negative adaptation of signaling pathway	16	2	0.1259637449955	1
GO:0023058	BP	adaptation of signaling pathway	16	2	0.1259637449955	1
GO:0044849	BP	estrous cycle	15	2	0.125989894572159	1
GO:0032929	BP	negative regulation of superoxide anion generation	3	1	0.126106739589947	1
GO:0071931	BP	positive regulation of transcription involved in G1/S transition of mitotic cell cycle	3	1	0.12632098269086	1
GO:1902893	BP	regulation of pri-miRNA transcription by RNA polymerase II	50	5	0.126579346978425	1
GO:0060536	BP	cartilage morphogenesis	12	2	0.126581830678794	1
GO:0035927	BP	RNA import into mitochondrion	5	1	0.12674366093907	1
GO:0001666	BP	response to hypoxia	343	19	0.126746626467271	1
GO:2000327	BP	positive regulation of nuclear receptor transcription coactivator activity	3	1	0.126751022043097	1
GO:0061035	BP	regulation of cartilage development	70	6	0.126779862362733	1
GO:0120036	BP	plasma membrane bounded cell projection organization	1467	76	0.126863713003697	1
GO:0071798	BP	response to prostaglandin D	5	1	0.126893716112151	1
GO:0071799	BP	cellular response to prostaglandin D stimulus	5	1	0.126893716112151	1
GO:0032412	BP	regulation of ion transmembrane transporter activity	246	15	0.126920601670936	1
GO:0051128	BP	regulation of cellular component organization	2307	109	0.127019170469051	1
GO:0007352	BP	zygotic specification of dorsal/ventral axis	3	1	0.127097754373076	1
GO:2001038	BP	regulation of cellular response to drug	3	1	0.127189950833122	1
GO:0099024	BP	plasma membrane invagination	61	5	0.127220214320091	1
GO:0046486	BP	glycerolipid metabolic process	411	21	0.127245373194923	1
GO:0071873	BP	response to norepinephrine	3	1	0.127370914144346	1
GO:0048870	BP	cell motility	1655	78	0.127394230157113	1
GO:0051674	BP	localization of cell	1655	78	0.127394230157113	1
GO:0004712	MF	protein serine/threonine/tyrosine kinase activity	44	4	0.127446407541705	1
GO:0046716	BP	muscle cell cellular homeostasis	18	2	0.127497455664179	1
GO:0010528	BP	regulation of transposition	24	2	0.127508643345604	1
GO:0010529	BP	negative regulation of transposition	24	2	0.127508643345604	1
GO:0007183	BP	SMAD protein complex assembly	13	2	0.127687826930146	1
GO:0010839	BP	negative regulation of keratinocyte proliferation	17	2	0.127742222743581	1
GO:0050974	BP	detection of mechanical stimulus involved in sensory perception	29	3	0.127816027569285	1
GO:0010710	BP	regulation of collagen catabolic process	4	1	0.12829036339649	1
GO:1990926	BP	short-term synaptic potentiation	3	1	0.128299299410324	1
GO:0071634	BP	regulation of transforming growth factor beta production	33	3	0.128432354039801	1
GO:1990511	BP	piRNA biosynthetic process	5	1	0.128497451432649	1
GO:1901207	BP	regulation of heart looping	2	1	0.128527462769602	1
GO:0042328	MF	heparan sulfate N-acetylglucosaminyltransferase activity	2	1	0.128644453988856	1
GO:0050509	MF	N-acetylglucosaminyl-proteoglycan 4-beta-glucuronosyltransferase activity	2	1	0.128644453988856	1
GO:0006998	BP	nuclear envelope organization	51	4	0.128837062131371	1
GO:0071547	CC	piP-body	5	1	0.129177975827981	1
GO:1904424	BP	regulation of GTP binding	13	2	0.129182728863827	1
GO:0070724	CC	BMP receptor complex	4	1	0.129339675680309	1
GO:0001889	BP	liver development	136	9	0.129345166246772	1
GO:0018209	BP	peptidyl-serine modification	306	18	0.129386546834985	1
GO:0007265	BP	Ras protein signal transduction	322	19	0.129588464705861	1
GO:0004725	MF	protein tyrosine phosphatase activity	96	7	0.129664234741709	1
GO:0032409	BP	regulation of transporter activity	270	16	0.129685199652875	1
GO:0035567	BP	non-canonical Wnt signaling pathway	147	10	0.12970508303442	1
GO:0003299	BP	muscle hypertrophy in response to stress	31	3	0.129869735550697	1
GO:0014887	BP	cardiac muscle adaptation	31	3	0.129869735550697	1
GO:0014898	BP	cardiac muscle hypertrophy in response to stress	31	3	0.129869735550697	1
GO:0032182	MF	ubiquitin-like protein binding	91	6	0.129950867872526	1
GO:0051941	BP	regulation of amino acid uptake involved in synaptic transmission	3	1	0.129964892883509	1
GO:0051946	BP	regulation of glutamate uptake involved in transmission of nerve impulse	3	1	0.129964892883509	1
GO:0070838	BP	divalent metal ion transport	451	24	0.130014999458274	1
GO:0016922	MF	nuclear receptor binding	100	7	0.130314530386669	1
GO:0021955	BP	central nervous system neuron axonogenesis	36	4	0.130544231116746	1
GO:0061337	BP	cardiac conduction	141	10	0.130553383279281	1
GO:0021622	BP	oculomotor nerve morphogenesis	2	1	0.130627262826325	1
GO:0021623	BP	oculomotor nerve formation	2	1	0.130627262826325	1
GO:1903078	BP	positive regulation of protein localization to plasma membrane	59	5	0.130794986815469	1
GO:0000308	CC	cytoplasmic cyclin-dependent protein kinase holoenzyme complex	2	1	0.130818278431324	1
GO:0051098	BP	regulation of binding	356	20	0.131296472977961	1
GO:0004803	MF	transposase activity	3	1	0.131396101454932	1
GO:0006313	BP	transposition	DNA-mediated	3	1	0.131396101454932	1
GO:1903859	BP	regulation of dendrite extension	24	3	0.131400627447685	1
GO:2000641	BP	regulation of early endosome to late endosome transport	16	2	0.131428756446973	1
GO:2000282	BP	regulation of cellular amino acid biosynthetic process	3	1	0.131438044654792	1
GO:1905335	BP	regulation of aggrephagy	3	1	0.13159136794162	1
GO:1905337	BP	positive regulation of aggrephagy	3	1	0.13159136794162	1
GO:0021943	BP	formation of radial glial scaffolds	3	1	0.13180023730979	1
GO:0021532	BP	neural tube patterning	40	4	0.13183907382401	1
GO:0048185	MF	activin binding	15	2	0.131858453960288	1
GO:0045111	CC	intermediate filament cytoskeleton	228	10	0.131909115161473	1
GO:0045989	BP	positive regulation of striated muscle contraction	15	2	0.131929548414792	1
GO:0071256	CC	translocon complex	5	1	0.131972276990566	1
GO:0004430	MF	1-phosphatidylinositol 4-kinase activity	6	1	0.132037329694105	1
GO:1990446	MF	U1 snRNP binding	5	1	0.132079563827974	1
GO:0042271	BP	susceptibility to natural killer cell mediated cytotoxicity	3	1	0.13213405996486	1
GO:0002277	BP	myeloid dendritic cell activation involved in immune response	3	1	0.13216675339499	1
GO:0048699	BP	generation of neurons	1502	81	0.132221967245983	1
GO:1902202	BP	regulation of hepatocyte growth factor receptor signaling pathway	4	1	0.132307135317168	1
GO:0002378	BP	immunoglobulin biosynthetic process	3	1	0.132309623053492	1
GO:0043620	BP	regulation of DNA-templated transcription in response to stress	112	7	0.132398715735128	1
GO:0003161	BP	cardiac conduction system development	13	2	0.132435954401856	1
GO:2000113	BP	negative regulation of cellular macromolecule biosynthetic process	1479	70	0.132478012334634	1
GO:0071636	BP	positive regulation of transforming growth factor beta production	18	2	0.132540556386158	1
GO:0001894	BP	tissue homeostasis	247	14	0.132742581399572	1
GO:1900451	BP	positive regulation of glutamate receptor signaling pathway	15	2	0.132749001668129	1
GO:0005956	CC	protein kinase CK2 complex	3	1	0.132776562767212	1
GO:0038062	MF	protein tyrosine kinase collagen receptor activity	3	1	0.132787483657375	1
GO:0006112	BP	energy reserve metabolic process	81	6	0.13300490188447	1
GO:0071148	CC	TEAD-1-YAP complex	2	1	0.133075132744154	1
GO:0019276	BP	UDP-N-acetylgalactosamine metabolic process	3	1	0.133157718480137	1
GO:0016054	BP	organic acid catabolic process	276	14	0.133166207328425	1
GO:0046395	BP	carboxylic acid catabolic process	276	14	0.133166207328425	1
GO:0031102	BP	neuron projection regeneration	56	5	0.133270991847595	1
GO:0015936	BP	coenzyme A metabolic process	15	2	0.133299015095722	1
GO:0072166	BP	posterior mesonephric tubule development	2	1	0.133446794297913	1
GO:0001704	BP	formation of primary germ layer	124	9	0.133505882435381	1
GO:0035455	BP	response to interferon-alpha	20	2	0.133543915203575	1
GO:0031468	BP	nuclear envelope reassembly	17	2	0.133566232085995	1
GO:0050681	MF	androgen receptor binding	27	3	0.133592756432776	1
GO:0036284	CC	tubulobulbar complex	2	1	0.133606242260463	1
GO:0016322	BP	neuron remodeling	13	2	0.133607661263515	1
GO:0021593	BP	rhombomere morphogenesis	2	1	0.133781383245982	1
GO:0021658	BP	rhombomere 3 morphogenesis	2	1	0.133781383245982	1
GO:0061739	BP	protein lipidation involved in autophagosome assembly	3	1	0.13381569298983	1
GO:0003404	BP	optic vesicle morphogenesis	2	1	0.133928954394141	1
GO:0046872	MF	metal ion binding	3933	168	0.133959572700841	1
GO:1901300	BP	positive regulation of hydrogen peroxide-mediated programmed cell death	4	1	0.134038984555212	1
GO:0032881	BP	regulation of polysaccharide metabolic process	42	4	0.134124636195978	1
GO:0106070	BP	regulation of adenylate cyclase-activating G protein-coupled receptor signaling pathway	14	2	0.134140901661888	1
GO:0043130	MF	ubiquitin binding	73	5	0.134339444236352	1
GO:0060831	BP	smoothened signaling pathway involved in dorsal/ventral neural tube patterning	14	2	0.1344166828384	1
GO:0045071	BP	negative regulation of viral genome replication	58	4	0.134519432387235	1
GO:0071657	BP	positive regulation of granulocyte colony-stimulating factor production	3	1	0.134539217310212	1
GO:1901258	BP	positive regulation of macrophage colony-stimulating factor production	3	1	0.134539217310212	1
GO:1902822	BP	regulation of late endosome to lysosome transport	4	1	0.134586672999097	1
GO:1903335	BP	regulation of vacuolar transport	4	1	0.134586672999097	1
GO:0031401	BP	positive regulation of protein modification process	1188	56	0.134643936274434	1
GO:0042800	MF	histone methyltransferase activity (H3-K4 specific)	15	2	0.134677254885691	1
GO:0045926	BP	negative regulation of growth	242	15	0.134732220535591	1
GO:2000078	BP	positive regulation of type B pancreatic cell development	3	1	0.13475926147578	1
GO:0016019	MF	peptidoglycan immune receptor activity	5	1	0.135010870043159	1
GO:0072329	BP	monocarboxylic acid catabolic process	137	8	0.135057823771943	1
GO:0032014	BP	positive regulation of ARF protein signal transduction	2	1	0.135330010491637	1
GO:0048730	BP	epidermis morphogenesis	31	3	0.135388655746362	1
GO:0004529	MF	exodeoxyribonuclease activity	20	2	0.135425249843613	1
GO:0016895	MF	exodeoxyribonuclease activity	producing 5'-phosphomonoesters	20	2	0.135425249843613	1
GO:0061614	BP	pri-miRNA transcription by RNA polymerase II	52	5	0.135541780428551	1
GO:0070418	CC	DNA-dependent protein kinase complex	2	1	0.13564284569504	1
GO:0009892	BP	negative regulation of metabolic process	3443	140	0.135732205058485	1
GO:0045967	BP	negative regulation of growth rate	3	1	0.135886460779683	1
GO:1902337	BP	regulation of apoptotic process involved in morphogenesis	12	2	0.13609562495442	1
GO:0045763	BP	negative regulation of cellular amino acid metabolic process	3	1	0.136151545856226	1
GO:0030279	BP	negative regulation of ossification	79	6	0.136236674212182	1
GO:0065005	BP	protein-lipid complex assembly	35	3	0.136338439813289	1
GO:0042578	MF	phosphoric ester hydrolase activity	353	19	0.13634493134154	1
GO:0048754	BP	branching morphogenesis of an epithelial tube	150	11	0.136355972022752	1
GO:0008171	MF	O-methyltransferase activity	20	2	0.136411145347772	1
GO:0150173	BP	positive regulation of phosphatidylcholine metabolic process	3	1	0.13646943990424	1
GO:2001247	BP	positive regulation of phosphatidylcholine biosynthetic process	3	1	0.13646943990424	1
GO:0048736	BP	appendage development	178	13	0.136560724673137	1
GO:0060173	BP	limb development	178	13	0.136560724673137	1
GO:0002886	BP	regulation of myeloid leukocyte mediated immunity	55	4	0.13678690285548	1
GO:0030336	BP	negative regulation of cell migration	319	17	0.13682740210029	1
GO:0030511	BP	positive regulation of transforming growth factor beta receptor signaling pathway	29	3	0.137178244429787	1
GO:1903846	BP	positive regulation of cellular response to transforming growth factor beta stimulus	29	3	0.137178244429787	1
GO:0042127	BP	regulation of cell population proliferation	1657	76	0.137183144717551	1
GO:0010742	BP	macrophage derived foam cell differentiation	38	3	0.137322065289744	1
GO:0090077	BP	foam cell differentiation	38	3	0.137322065289744	1
GO:2000781	BP	positive regulation of double-strand break repair	33	3	0.137372644688929	1
GO:0010854	MF	adenylate cyclase regulator activity	2	1	0.137389696406182	1
GO:0010855	MF	adenylate cyclase inhibitor activity	2	1	0.137389696406182	1
GO:0007369	BP	gastrulation	180	12	0.137414407711015	1
GO:0046573	MF	lactonohydrolase activity	3	1	0.137530421017486	1
GO:0102007	MF	acyl-L-homoserine-lactone lactonohydrolase activity	3	1	0.137530421017486	1
GO:0050864	BP	regulation of B cell activation	114	7	0.137660974350939	1
GO:0051883	BP	killing of cells in other organism involved in symbiotic interaction	26	2	0.13777049379606	1
GO:0048697	BP	positive regulation of collateral sprouting in absence of injury	2	1	0.137984668557138	1
GO:0051425	MF	PTB domain binding	3	1	0.138136072287622	1
GO:0072401	BP	signal transduction involved in DNA integrity checkpoint	72	5	0.138174351583889	1
GO:0072422	BP	signal transduction involved in DNA damage checkpoint	72	5	0.138174351583889	1
GO:1904979	BP	negative regulation of endosome organization	2	1	0.138254879840857	1
GO:1905365	BP	regulation of intralumenal vesicle formation	2	1	0.138254879840857	1
GO:1905366	BP	negative regulation of intralumenal vesicle formation	2	1	0.138254879840857	1
GO:1903781	BP	positive regulation of cardiac conduction	3	1	0.138321552731231	1
GO:0033043	BP	regulation of organelle organization	1250	59	0.138373719496272	1
GO:1902623	BP	negative regulation of neutrophil migration	4	1	0.138526598091862	1
GO:0035335	BP	peptidyl-tyrosine dephosphorylation	98	7	0.138655675405425	1
GO:0047237	MF	glucuronylgalactosylproteoglycan 4-beta-N-acetylgalactosaminyltransferase activity	3	1	0.138684184650743	1
GO:0072511	BP	divalent inorganic cation transport	457	24	0.138684212932559	1
GO:0022615	BP	protein to membrane docking	4	1	0.138825385835952	1
GO:0101006	MF	protein histidine phosphatase activity	3	1	0.138912471807085	1
GO:0045682	BP	regulation of epidermis development	91	6	0.139020042227023	1
GO:0035801	BP	adrenal cortex development	2	1	0.139061010378995	1
GO:0035802	BP	adrenal cortex formation	2	1	0.139061010378995	1
GO:0021590	BP	cerebellum maturation	3	1	0.139062411596916	1
GO:0021699	BP	cerebellar cortex maturation	3	1	0.139062411596916	1
GO:0032922	BP	circadian regulation of gene expression	62	5	0.13922896156113	1
GO:0010224	BP	response to UV-B	17	2	0.139469237464139	1
GO:0010612	BP	regulation of cardiac muscle adaptation	18	2	0.139494604251889	1
GO:1903242	BP	regulation of cardiac muscle hypertrophy in response to stress	18	2	0.139494604251889	1
GO:0043199	MF	sulfate binding	5	1	0.139511997116844	1
GO:0072180	BP	mesonephric duct morphogenesis	3	1	0.139647193691573	1
GO:0003249	BP	cell proliferation involved in heart valve morphogenesis	3	1	0.139736551711944	1
GO:0003250	BP	regulation of cell proliferation involved in heart valve morphogenesis	3	1	0.139736551711944	1
GO:0070447	BP	positive regulation of oligodendrocyte progenitor proliferation	3	1	0.13975224680237	1
GO:2000669	BP	negative regulation of dendritic cell apoptotic process	6	1	0.140178250684919	1
GO:0006549	BP	isoleucine metabolic process	5	1	0.140241183404885	1
GO:0061008	BP	hepaticobiliary system development	139	9	0.140268287818459	1
GO:0005694	CC	chromosome	1881	84	0.140314957858044	1
GO:0010830	BP	regulation of myotube differentiation	63	5	0.140466033883392	1
GO:0030030	BP	cell projection organization	1508	77	0.140638847123976	1
GO:1904748	BP	regulation of apoptotic process involved in development	13	2	0.140779832622101	1
GO:0008276	MF	protein methyltransferase activity	86	6	0.140865541044892	1
GO:1902548	BP	negative regulation of cellular response to vascular endothelial growth factor stimulus	19	2	0.140900653887798	1
GO:0070996	MF	type 1 melanocortin receptor binding	4	1	0.141011305363132	1
GO:1903959	BP	regulation of anion transmembrane transport	29	3	0.141127341893978	1
GO:0000785	CC	chromatin	1406	66	0.141209037274821	1
GO:0017145	BP	stem cell division	41	4	0.14121113975465	1
GO:0045736	BP	negative regulation of cyclin-dependent protein serine/threonine kinase activity	33	3	0.141352778107845	1
GO:0060998	BP	regulation of dendritic spine development	68	6	0.141395563981488	1
GO:0030144	MF	alpha-1	6-mannosylglycoprotein 6-beta-N-acetylglucosaminyltransferase activity	2	1	0.141454131971715	1
GO:0045104	BP	intermediate filament cytoskeleton organization	49	4	0.14158225000297	1
GO:0009953	BP	dorsal/ventral pattern formation	92	7	0.141635449134051	1
GO:0035359	BP	negative regulation of peroxisome proliferator activated receptor signaling pathway	3	1	0.141704965231909	1
GO:0005353	MF	fructose transmembrane transporter activity	4	1	0.141780414017998	1
GO:0032747	BP	positive regulation of interleukin-23 production	5	1	0.141851237312153	1
GO:0060911	BP	cardiac cell fate commitment	13	2	0.141861752584635	1
GO:0051216	BP	cartilage development	191	13	0.141887596194996	1
GO:1905224	BP	clathrin-coated pit assembly	3	1	0.141889951986559	1
GO:0004185	MF	serine-type carboxypeptidase activity	5	1	0.142006396895402	1
GO:0042133	BP	neurotransmitter metabolic process	28	3	0.142020197613113	1
GO:0000821	BP	regulation of arginine metabolic process	4	1	0.142037845754493	1
GO:0009890	BP	negative regulation of biosynthetic process	1616	75	0.142186470595534	1
GO:0042987	BP	amyloid precursor protein catabolic process	50	4	0.142273704677889	1
GO:0061684	BP	chaperone-mediated autophagy	15	2	0.142339987597187	1
GO:2001074	BP	regulation of metanephric ureteric bud development	2	1	0.142856997547153	1
GO:2001076	BP	positive regulation of metanephric ureteric bud development	2	1	0.142856997547153	1
GO:0042766	BP	nucleosome mobilization	4	1	0.143200803111786	1
GO:0071442	BP	positive regulation of histone H3-K14 acetylation	3	1	0.143484939185442	1
GO:0005154	MF	epidermal growth factor receptor binding	34	3	0.14351037377448	1
GO:0003207	BP	cardiac chamber formation	12	2	0.143575310416896	1
GO:0061418	BP	regulation of transcription from RNA polymerase II promoter in response to hypoxia	76	5	0.143592222103522	1
GO:0006743	BP	ubiquinone metabolic process	20	2	0.143699755912292	1
GO:0072012	BP	glomerulus vasculature development	26	3	0.143750324338785	1
GO:0030168	BP	platelet activation	152	10	0.143937114036922	1
GO:0051168	BP	nuclear export	193	10	0.144529610727865	1
GO:0014074	BP	response to purine-containing compound	144	9	0.144564777834945	1
GO:1903849	BP	positive regulation of aorta morphogenesis	2	1	0.144613379858576	1
GO:1990757	MF	ubiquitin ligase activator activity	4	1	0.144618778353344	1
GO:0035967	BP	cellular response to topologically incorrect protein	161	9	0.144628870818254	1
GO:0008169	MF	C-methyltransferase activity	5	1	0.144933881161961	1
GO:2000501	BP	regulation of natural killer cell chemotaxis	8	1	0.144982830494076	1
GO:0090596	BP	sensory organ morphogenesis	264	17	0.145030600286137	1
GO:0044297	CC	cell body	566	31	0.14518552061698	1
GO:0055005	BP	ventricular cardiac myofibril assembly	3	1	0.145192864909184	1
GO:0007566	BP	embryo implantation	53	4	0.14529946283432	1
GO:0044853	CC	plasma membrane raft	112	8	0.14534605917616	1
GO:0031781	MF	type 3 melanocortin receptor binding	4	1	0.145396170760065	1
GO:0031782	MF	type 4 melanocortin receptor binding	4	1	0.145396170760065	1
GO:1900149	BP	positive regulation of Schwann cell migration	2	1	0.145424187378899	1
GO:2000273	BP	positive regulation of signaling receptor activity	35	3	0.145446620631988	1
GO:0021812	BP	neuronal-glial interaction involved in cerebral cortex radial glia guided migration	2	1	0.145472478772413	1
GO:0014005	BP	microglia development	4	1	0.145512065724065	1
GO:0050792	BP	regulation of viral process	210	11	0.14556894670152	1
GO:1903027	BP	regulation of opsonization	4	1	0.145587121933099	1
GO:1902305	BP	regulation of sodium ion transmembrane transport	61	5	0.145595563635851	1
GO:0019748	BP	secondary metabolic process	55	4	0.145601035500604	1
GO:0002950	MF	ceramide phosphoethanolamine synthase activity	3	1	0.145698580191492	1
GO:0033188	MF	sphingomyelin synthase activity	3	1	0.145698580191492	1
GO:0047493	MF	ceramide cholinephosphotransferase activity	3	1	0.145698580191492	1
GO:0060313	BP	negative regulation of blood vessel remodeling	3	1	0.145720054142245	1
GO:0000123	CC	histone acetyltransferase complex	75	5	0.145807619827596	1
GO:0031326	BP	regulation of cellular biosynthetic process	3916	166	0.146045609722086	1
GO:0044467	BP	glial cell-derived neurotrophic factor secretion	3	1	0.146065113411314	1
GO:1900166	BP	regulation of glial cell-derived neurotrophic factor secretion	3	1	0.146065113411314	1
GO:1900168	BP	positive regulation of glial cell-derived neurotrophic factor secretion	3	1	0.146065113411314	1
GO:0099080	CC	supramolecular complex	1232	55	0.146136402055275	1
GO:0036150	BP	phosphatidylserine acyl-chain remodeling	21	2	0.146186371971744	1
GO:0071947	BP	protein deubiquitination involved in ubiquitin-dependent protein catabolic process	4	1	0.146230959337972	1
GO:0070995	BP	NADPH oxidation	4	1	0.146328704688945	1
GO:0072395	BP	signal transduction involved in cell cycle checkpoint	73	5	0.146366715196735	1
GO:0006355	BP	regulation of transcription	DNA-templated	3188	139	0.14638897528164	1
GO:0006470	BP	protein dephosphorylation	308	17	0.146548382329106	1
GO:1904928	MF	coreceptor activity involved in canonical Wnt signaling pathway	3	1	0.146686190064522	1
GO:0045103	BP	intermediate filament-based process	50	4	0.146825054394013	1
GO:2001267	BP	regulation of cysteine-type endopeptidase activity involved in apoptotic signaling pathway	17	2	0.146870345058093	1
GO:0048846	BP	axon extension involved in axon guidance	36	4	0.146921155618784	1
GO:1902284	BP	neuron projection extension involved in neuron projection guidance	36	4	0.146921155618784	1
GO:0006837	BP	serotonin transport	19	2	0.146961242419996	1
GO:0030397	BP	membrane disassembly	16	2	0.147212572014378	1
GO:0051081	BP	nuclear envelope disassembly	16	2	0.147212572014378	1
GO:0051480	BP	regulation of cytosolic calcium ion concentration	337	18	0.147260391401576	1
GO:2000670	BP	positive regulation of dendritic cell apoptotic process	4	1	0.147321715332773	1
GO:0060740	BP	prostate gland epithelium morphogenesis	25	3	0.147361270415694	1
GO:0021877	BP	forebrain neuron fate commitment	10	2	0.147384840658861	1
GO:0046627	BP	negative regulation of insulin receptor signaling pathway	33	3	0.147441549489103	1
GO:0018205	BP	peptidyl-lysine modification	375	19	0.147527854079254	1
GO:0000270	BP	peptidoglycan metabolic process	6	1	0.147531148076433	1
GO:0009253	BP	peptidoglycan catabolic process	6	1	0.147531148076433	1
GO:0006101	BP	citrate metabolic process	5	1	0.147535197620933	1
GO:0005521	MF	lamin binding	16	2	0.147843747625835	1
GO:0072262	BP	metanephric glomerular mesangial cell proliferation involved in metanephros development	3	1	0.148261274738712	1
GO:0035019	BP	somatic stem cell population maintenance	74	6	0.148455299117399	1
GO:0002314	BP	germinal center B cell differentiation	6	1	0.148522649426729	1
GO:0016893	MF	endonuclease activity	active with either ribo- or deoxyribonucleic acids and producing 5'-phosphomonoesters	39	3	0.148541107499571	1
GO:0035403	MF	histone kinase activity (H3-T6 specific)	2	1	0.148542328247062	1
GO:0035408	BP	histone H3-T6 phosphorylation	2	1	0.148542328247062	1
GO:0005925	CC	focal adhesion	401	23	0.14859464039792	1
GO:0060589	MF	nucleoside-triphosphatase regulator activity	321	18	0.148718718437388	1
GO:0035675	BP	neuromast hair cell development	2	1	0.148880006037832	1
GO:0048882	BP	lateral line development	2	1	0.148880006037832	1
GO:0048884	BP	neuromast development	2	1	0.148880006037832	1
GO:0048886	BP	neuromast hair cell differentiation	2	1	0.148880006037832	1
GO:0060480	BP	lung goblet cell differentiation	4	1	0.148943125013987	1
GO:0048306	MF	calcium-dependent protein binding	76	5	0.149011517714601	1
GO:0046827	BP	positive regulation of protein export from nucleus	19	2	0.149125286716801	1
GO:0048012	BP	hepatocyte growth factor receptor signaling pathway	16	2	0.149274044249121	1
GO:0030017	CC	sarcomere	199	12	0.149296877301425	1
GO:0045569	MF	TRAIL binding	5	1	0.149751014974079	1
GO:1904030	BP	negative regulation of cyclin-dependent protein kinase activity	34	3	0.14976100087429	1
GO:0070404	MF	NADH binding	3	1	0.149846298869385	1
GO:0014065	BP	phosphatidylinositol 3-kinase signaling	153	10	0.14989829163229	1
GO:0014902	BP	myotube differentiation	114	8	0.149984124226153	1
GO:0061689	CC	tricellular tight junction	4	1	0.15007416813439	1
GO:0031685	MF	adenosine receptor binding	5	1	0.150116502340071	1
GO:0002070	BP	epithelial cell maturation	16	2	0.1501434883703	1
GO:0042713	BP	sperm ejaculation	5	1	0.150166777733539	1
GO:1902992	BP	negative regulation of amyloid precursor protein catabolic process	17	2	0.150466302267802	1
GO:0034250	BP	positive regulation of cellular amide metabolic process	154	9	0.150566750913511	1
GO:0030242	BP	autophagy of peroxisome	5	1	0.150588355658964	1
GO:0071241	BP	cellular response to inorganic substance	209	12	0.150765011957321	1
GO:0036293	BP	response to decreased oxygen levels	354	19	0.150794844595315	1
GO:0016311	BP	dephosphorylation	469	24	0.150823223761366	1
GO:0019958	MF	C-X-C chemokine binding	6	1	0.1508721453619	1
GO:0004579	MF	dolichyl-diphosphooligosaccharide-protein glycotransferase activity	5	1	0.151212489559888	1
GO:0007160	BP	cell-matrix adhesion	221	14	0.151391140825872	1
GO:0043046	BP	DNA methylation involved in gamete generation	20	2	0.151508058324378	1
GO:0044262	BP	cellular carbohydrate metabolic process	277	15	0.151523653527293	1
GO:0046875	MF	ephrin receptor binding	26	3	0.151644704484325	1
GO:0050777	BP	negative regulation of immune response	146	8	0.151647862589573	1
GO:1902003	BP	regulation of amyloid-beta formation	33	3	0.151663369513924	1
GO:0008305	CC	integrin complex	31	3	0.151819017963049	1
GO:0070509	BP	calcium ion import	78	6	0.152079453702997	1
GO:0043984	BP	histone H4-K16 acetylation	18	2	0.152157218398977	1
GO:0009581	BP	detection of external stimulus	130	8	0.152305273432622	1
GO:0035523	BP	protein K29-linked deubiquitination	4	1	0.152339168937311	1
GO:0001946	BP	lymphangiogenesis	15	2	0.152411929683815	1
GO:0009889	BP	regulation of biosynthetic process	4000	169	0.152425266418004	1
GO:0050768	BP	negative regulation of neurogenesis	283	18	0.15257943431259	1
GO:0016602	CC	CCAAT-binding factor complex	4	1	0.152760806999482	1
GO:0061024	BP	membrane organization	837	40	0.152849050232649	1
GO:0060083	BP	smooth muscle contraction involved in micturition	2	1	0.15287846224359	1
GO:0045648	BP	positive regulation of erythrocyte differentiation	31	3	0.153129239452313	1
GO:0030538	BP	embryonic genitalia morphogenesis	3	1	0.153143786319525	1
GO:0050508	MF	glucuronosyl-N-acetylglucosaminyl-proteoglycan 4-alpha-N-acetylglucosaminyltransferase activity	3	1	0.153184294451401	1
GO:0009110	BP	vitamin biosynthetic process	20	2	0.153196863727966	1
GO:0097681	BP	double-strand break repair via alternative nonhomologous end joining	4	1	0.153231093085061	1
GO:0004095	MF	carnitine O-palmitoyltransferase activity	4	1	0.153300980075124	1
GO:0042986	BP	positive regulation of amyloid precursor protein biosynthetic process	4	1	0.153348261542693	1
GO:0090501	BP	RNA phosphodiester bond hydrolysis	156	8	0.15346051959006	1
GO:0070304	BP	positive regulation of stress-activated protein kinase signaling cascade	164	10	0.1536123490522	1
GO:0007340	BP	acrosome reaction	39	3	0.153659708643369	1
GO:0071840	BP	cellular component organization or biogenesis	6219	262	0.153751356365681	1
GO:0021592	BP	fourth ventricle development	2	1	0.153759645895275	1
GO:1903358	BP	regulation of Golgi organization	16	2	0.153834233392856	1
GO:0040013	BP	negative regulation of locomotion	363	19	0.15388766547117	1
GO:0071655	BP	regulation of granulocyte colony-stimulating factor production	4	1	0.153906968030493	1
GO:1990258	BP	histone glutamine methylation	4	1	0.153942791658252	1
GO:1903762	BP	positive regulation of voltage-gated potassium channel activity involved in ventricular cardiac muscle cell action potential repolarization	4	1	0.154074943418384	1
GO:1903947	BP	positive regulation of ventricular cardiac muscle cell action potential	4	1	0.154074943418384	1
GO:1905026	BP	positive regulation of membrane repolarization during ventricular cardiac muscle cell action potential	4	1	0.154074943418384	1
GO:1905033	BP	positive regulation of membrane repolarization during cardiac muscle cell action potential	4	1	0.154074943418384	1
GO:0036499	BP	PERK-mediated unfolded protein response	21	2	0.15407646083792	1
GO:0140467	BP	integrated stress response signaling	21	2	0.15407646083792	1
GO:0072583	BP	clathrin-dependent endocytosis	44	4	0.154119359093644	1
GO:0000502	CC	proteasome complex	62	4	0.154196096945926	1
GO:0045505	MF	dynein intermediate chain binding	29	3	0.154356309193999	1
GO:0098978	CC	glutamatergic synapse	340	21	0.154371948594135	1
GO:1905908	BP	positive regulation of amyloid fibril formation	4	1	0.154648958080375	1
GO:0009310	BP	amine catabolic process	22	2	0.154748559482699	1
GO:0003213	BP	cardiac right atrium morphogenesis	2	1	0.154819469964344	1
GO:0007254	BP	JNK cascade	201	12	0.154826863305243	1
GO:0055065	BP	metal ion homeostasis	619	30	0.155010860178312	1
GO:0033183	BP	negative regulation of histone ubiquitination	4	1	0.155071742334552	1
GO:1901314	BP	regulation of histone H2A K63-linked ubiquitination	4	1	0.155071742334552	1
GO:1901315	BP	negative regulation of histone H2A K63-linked ubiquitination	4	1	0.155071742334552	1
GO:0004427	MF	inorganic diphosphatase activity	4	1	0.155654210442695	1
GO:0022898	BP	regulation of transmembrane transporter activity	255	15	0.155699242268291	1
GO:0001701	BP	in utero embryonic development	364	20	0.15591642298018	1
GO:0060249	BP	anatomical structure homeostasis	441	22	0.155981212286805	1
GO:0051973	BP	positive regulation of telomerase activity	35	3	0.156105087421292	1
GO:0010751	BP	negative regulation of nitric oxide mediated signal transduction	3	1	0.156110324078433	1
GO:0001921	BP	positive regulation of receptor recycling	14	2	0.156247471009842	1
GO:0043170	BP	macromolecule metabolic process	9594	364	0.156257386513254	1
GO:0055011	BP	atrial cardiac muscle cell differentiation	3	1	0.156260710680303	1
GO:0055014	BP	atrial cardiac muscle cell development	3	1	0.156260710680303	1
GO:0010556	BP	regulation of macromolecule biosynthetic process	3769	160	0.156355899755554	1
GO:0000421	CC	autophagosome membrane	36	3	0.156363423131355	1
GO:0048585	BP	negative regulation of response to stimulus	1660	75	0.15638884079243	1
GO:0098839	CC	postsynaptic density membrane	89	7	0.156495783939967	1
GO:0021700	BP	developmental maturation	278	16	0.156562070129283	1
GO:0048070	BP	regulation of developmental pigmentation	15	2	0.156580024937747	1
GO:0043266	BP	regulation of potassium ion transport	101	7	0.156638855414158	1
GO:0019240	BP	citrulline biosynthetic process	4	1	0.156685511374434	1
GO:0071495	BP	cellular response to endogenous stimulus	1345	65	0.156696884601178	1
GO:1904958	BP	positive regulation of midbrain dopaminergic neuron differentiation	3	1	0.156921862046126	1
GO:0000186	BP	activation of MAPKK activity	49	4	0.156922563173787	1
GO:0050501	MF	hyaluronan synthase activity	4	1	0.157174242024504	1
GO:0140199	BP	negative regulation of adenylate cyclase-activating adrenergic receptor signaling pathway involved in heart process	4	1	0.15732727430412	1
GO:0004832	MF	valine-tRNA ligase activity	2	1	0.157438235487098	1
GO:0006438	BP	valyl-tRNA aminoacylation	2	1	0.157438235487098	1
GO:0099173	BP	postsynapse organization	156	11	0.157791667906965	1
GO:0008201	MF	heparin binding	167	10	0.157902437108272	1
GO:0006567	BP	threonine catabolic process	5	1	0.157944815344512	1
GO:0019518	BP	L-threonine catabolic process to glycine	5	1	0.157944815344512	1
GO:0150117	BP	positive regulation of cell-substrate junction organization	29	3	0.157956964483717	1
GO:0033142	MF	progesterone receptor binding	3	1	0.15796201937466	1
GO:0017083	MF	4-galactosyl-N-acetylglucosaminide 3-alpha-L-fucosyltransferase activity	6	1	0.157997003742196	1
GO:0001907	BP	killing by symbiont of host cells	4	1	0.158088045497424	1
GO:0050904	BP	diapedesis	5	1	0.158170451878042	1
GO:0006104	BP	succinyl-CoA metabolic process	5	1	0.158289092146003	1
GO:0031087	BP	deadenylation-independent decapping of nuclear-transcribed mRNA	5	1	0.158541286363754	1
GO:0006787	BP	porphyrin-containing compound catabolic process	7	1	0.158748408375871	1
GO:0033015	BP	tetrapyrrole catabolic process	7	1	0.158748408375871	1
GO:0042167	BP	heme catabolic process	7	1	0.158748408375871	1
GO:0046149	BP	pigment catabolic process	7	1	0.158748408375871	1
GO:0050872	BP	white fat cell differentiation	14	2	0.158810641180868	1
GO:1903053	BP	regulation of extracellular matrix organization	43	4	0.158883044937144	1
GO:0007043	BP	cell-cell junction assembly	140	9	0.158891857991787	1
GO:0032270	BP	positive regulation of cellular protein metabolic process	1549	70	0.158961998143329	1
GO:0060900	BP	embryonic camera-type eye formation	12	2	0.158977132658741	1
GO:0003756	MF	protein disulfide isomerase activity	19	2	0.159159417013759	1
GO:0016864	MF	intramolecular oxidoreductase activity	transposing S-S bonds	19	2	0.159159417013759	1
GO:2000852	BP	regulation of corticosterone secretion	4	1	0.159177712801541	1
GO:0051661	BP	maintenance of centrosome location	6	1	0.159297473296346	1
GO:0071604	BP	transforming growth factor beta production	35	3	0.159403705031241	1
GO:0006091	BP	generation of precursor metabolites and energy	491	22	0.159441201975901	1
GO:0060674	BP	placenta blood vessel development	33	3	0.159589806811625	1
GO:0060252	BP	positive regulation of glial cell proliferation	17	2	0.159865700138117	1
GO:0005886	CC	plasma membrane	5006	208	0.15987529652376	1
GO:0051715	BP	cytolysis in other organism	9	1	0.159879759861563	1
GO:0051801	BP	cytolysis in other organism involved in symbiotic interaction	9	1	0.159879759861563	1
GO:0051838	BP	cytolysis by host of symbiont cells	9	1	0.159879759861563	1
GO:0071902	BP	positive regulation of protein serine/threonine kinase activity	327	18	0.159905542585098	1
GO:1904355	BP	positive regulation of telomere capping	17	2	0.15993082458741	1
GO:0046847	BP	filopodium assembly	57	5	0.160021360265856	1
GO:1990761	CC	growth cone lamellipodium	3	1	0.160040795031004	1
GO:0030620	MF	U2 snRNA binding	5	1	0.160067964713871	1
GO:0045202	CC	synapse	1286	67	0.160080262763127	1
GO:0030672	CC	synaptic vesicle membrane	101	7	0.160204783393463	1
GO:0099501	CC	exocytic vesicle membrane	101	7	0.160204783393463	1
GO:0004707	MF	MAP kinase activity	18	2	0.160346439654574	1
GO:0032184	MF	SUMO polymer binding	5	1	0.160469092856302	1
GO:0006611	BP	protein export from nucleus	175	9	0.160556416065595	1
GO:0031674	CC	I band	134	9	0.160684155943271	1
GO:0002372	BP	myeloid dendritic cell cytokine production	6	1	0.160760667136068	1
GO:0002733	BP	regulation of myeloid dendritic cell cytokine production	6	1	0.160760667136068	1
GO:0002735	BP	positive regulation of myeloid dendritic cell cytokine production	6	1	0.160760667136068	1
GO:0030858	BP	positive regulation of epithelial cell differentiation	74	5	0.160845800508891	1
GO:0034767	BP	positive regulation of ion transmembrane transport	150	9	0.161015001790242	1
GO:1902263	BP	apoptotic process involved in embryonic digit morphogenesis	3	1	0.161071059232147	1
GO:0008592	BP	regulation of Toll signaling pathway	4	1	0.161095974930779	1
GO:0005509	MF	calcium ion binding	669	33	0.16119373673556	1
GO:1903542	BP	negative regulation of exosomal secretion	3	1	0.161305634215354	1
GO:0060435	BP	bronchiole development	3	1	0.161365930775216	1
GO:0046320	BP	regulation of fatty acid oxidation	31	3	0.161388287853594	1
GO:0062028	BP	regulation of stress granule assembly	5	1	0.1614376770393	1
GO:0006325	BP	chromatin organization	745	35	0.161501011737602	1
GO:0010558	BP	negative regulation of macromolecule biosynthetic process	1529	71	0.16157221150855	1
GO:0006565	BP	L-serine catabolic process	4	1	0.161707645907794	1
GO:0045923	BP	positive regulation of fatty acid metabolic process	35	3	0.16179368969623	1
GO:0044331	BP	cell-cell adhesion mediated by cadherin	27	3	0.161810826004491	1
GO:1900077	BP	negative regulation of cellular response to insulin stimulus	35	3	0.161823839445653	1
GO:0051851	BP	modulation by host of symbiont process	57	4	0.161888275012214	1
[truncated: 20,612 more rows]
[truncated: 2 more columns]
