# Supplementary material for: Large-scale placenta DNA methylation integrated analysis reveals fetal sex-specific differentially methylated CpG sites and regions
Source: Sci Rep. 2022 Jun 7;12:9396. doi: 10.1038/s41598-022-13544-z (PMC9174475; doi:10.1038/s41598-022-13544-z)
Supplement: Supplementary file 11 — Supplementary Information 11. [file 41598_2022_13544_MOESM11_ESM.csv]

chr	start	end	p.value	fwer	p.valueArea	fwerArea	MD
chr19	52074293	52074501	0	0	0	0	0.170096082329064
chr5	150284416	150284796	0	0	0	0	0.172419788464031
chr5	126408756	126409553	0	0	0	0	-0.0737184326346234
chr11	2906285	2907127	0	0	1.83022661081512e-06	0.007	0.0242725854825306
chr7	86974674	86975244	2.6146094440216e-07	0.001	3.66045322163025e-06	0.014	-0.0521656907401146
chr7	27169674	27171051	5.22921888804321e-07	0.002	1.04584377760864e-05	0.039	-0.0371783323899384
chr4	90758120	90759203	1.04584377760864e-06	0.004	1.72564223305426e-05	0.065	-0.039348420670632
chr6	28641622	28642394	3.39899227722809e-06	0.013	1.83022661081512e-05	0.069	0.0329459113842774
chr9	98637332	98638444	2.6146094440216e-07	0.001	2.24856412185858e-05	0.085	-0.0561221214057477
chr4	57371368	57372597	2.09168755521728e-06	0.008	3.34670008834765e-05	0.124	-0.0425123765602027
chr3	45883249	45883859	1.41188909977167e-05	0.052	6.43193923229315e-05	0.23	0.023612151125103
chr10	106014296	106015050	1.04584377760864e-05	0.039	6.79798455445617e-05	0.239	-0.0312416248238401
chr8	146227953	146228461	1.93481098857599e-05	0.073	7.84382833206481e-05	0.269	0.0143877444063508
chr11	43902112	43902557	1.38574300533145e-05	0.052	9.41259399847777e-05	0.311	0.0365706571568382
chr6	56111812	56112696	2.30085631073901e-05	0.087	0.000102492690205647	0.331	-0.0565213583498517
chr17	46018654	46019184	5.75214077684753e-06	0.022	0.000109552135704505	0.346	0.0278603768230266
chr15	40697568	40698392	2.24856412185858e-05	0.083	0.000124978331424233	0.384	-0.0345747681667418
chr6	28972963	28973524	3.55586884386938e-05	0.127	0.000145372285087601	0.424	-0.044760683176557
chr12	130501688	130502586	3.79118369383133e-05	0.132	0.000149032738309231	0.432	0.0530395372835705
chr5	43396802	43397288	4.18337511043457e-06	0.016	0.000164981855917763	0.467	-0.0439897269116921
chr3	128209772	128212273	5.64755639908666e-05	0.194	0.00016707354347298	0.471	0.0461807373804146
chr20	61147652	61148894	4.57556652703781e-05	0.165	0.000171518379527817	0.481	0.026531420901779
chr6	168970774	168972517	5.62141030464645e-05	0.202	0.000180669512581893	0.493	-0.0239403329522136
chr5	50678451	50679743	5.90901734348882e-05	0.211	0.000180930973526295	0.494	-0.0317184506280887
chr14	94855034	94855990	5.75214077684753e-06	0.022	0.000194265481690805	0.52	0.0690458045172537
chr15	40544855	40545511	5.75214077684753e-05	0.201	0.000194526942635207	0.52	0.00761777644007741
chr4	186732837	186733428	4.05264463823349e-05	0.14	0.000197403013023631	0.526	0.0390711159368018
chr10	42862876	42863594	4.05264463823349e-05	0.14	0.000198187395856838	0.527	-0.0423759413809364
chr8	143858414	143858791	4.62785871591824e-05	0.16	0.000218058427631402	0.569	0.0300637147216791
chr18	23713407	23714084	6.64110798781487e-05	0.225	0.000237145076572759	0.598	-0.05877076238966
chr6	26224013	26224714	3.13753133282592e-06	0.012	0.000240544068849988	0.6	0.0395143917593598
chr10	62703741	62704447	7.03329940441811e-05	0.237	0.000246819131515639	0.609	0.0223249689041807
chr11	111807548	111808394	7.11173768773876e-05	0.239	0.000249956662848465	0.614	-0.0384037882775712
chr3	44666362	44667010	8.07914318202676e-05	0.263	0.000252048350403683	0.618	-0.0334534694017779
chr2	20101139	20101961	9.98780807616253e-05	0.322	0.000261199483457758	0.633	-0.0322852637069678
chr15	79382548	79383644	0.000101446846428038	0.326	0.000266167241401399	0.637	0.0164718395820624
chr6	28557291	28557575	8.49748069307021e-05	0.276	0.000275318374455475	0.644	0.0249014004027755
chr19	52531438	52531956	4.05264463823349e-05	0.142	0.000305386383061723	0.688	0.0280469023747293
chr7	56515510	56516504	0.000120272034424994	0.378	0.000308523914394549	0.692	0.0159830003366629
chr1	53904088	53905233	4.60171262147802e-05	0.16	0.000326041797669494	0.712	-0.0318330185743165
chr12	130603995	130605112	4.8893196603204e-05	0.17	0.000340160688667211	0.734	0.0447286491809381
chr8	11659832	11660924	0.000181453895415099	0.51	0.000455726426092966	0.823	0.0189765694786911
chr3	156543471	156544586	0.000178839285971078	0.506	0.000506188388362583	0.853	-0.0316016976306783
chr2	24397539	24398859	0.000208645833632924	0.56	0.000511156146306224	0.855	-0.031228725538703
chr3	36421572	36422406	0.000194004020746403	0.536	0.000533118865636005	0.864	0.0195538803397093
chr2	219857793	219858154	2.6146094440216e-05	0.096	0.000556388889687797	0.873	0.0526433319759248
chr3	137483479	137484586	0.000240021146961183	0.608	0.000583580827905622	0.881	0.0246190151645604
chr5	110074217	110074611	5.3860954546845e-05	0.187	0.000596392414181328	0.885	-0.0232237865905227
chr12	6560689	6560851	5.22921888804321e-06	0.02	0.000607635234790621	0.89	-0.0406658264454913
chr1	152814831	152816168	3.13753133282592e-05	0.112	0.000609204000457034	0.891	0.0682290267193574
chr1	152730027	152731590	6.48423142117358e-05	0.217	0.000665418103503498	0.906	0.057000320185466
chr8	143807962	143809371	0.000160275558918524	0.45	0.000675615080335182	0.909	0.0212093314714417
chr5	172660996	172662328	0.000289698726397594	0.668	0.000692087119832519	0.914	0.0431875664510498
chr11	47736132	47737105	0.000294405023396833	0.673	0.000701238252886594	0.915	-0.0231276562441958
chr5	42951192	42952369	4.10493682711392e-05	0.144	0.000734182331881266	0.925	-0.0752452904514679
chr7	75931693	75932007	0.000338591923000798	0.724	0.000768172254653547	0.937	-0.0273103761559326
chr15	60296981	60298519	9.33415571515713e-05	0.295	0.000783336989428873	0.943	-0.0423558763743935
chr5	50264516	50265767	0.000222764724630641	0.573	0.000792226661538546	0.945	-0.030664131794241
chr2	144994885	144995448	1.38574300533145e-05	0.053	0.000799547567981807	0.947	-0.053979266528187
chr7	27191564	27192656	0.0003872236586596	0.772	0.000841904240974956	0.956	0.0347292018502418
chr17	32690127	32690732	6.14433219345077e-05	0.209	0.000867527413526368	0.963	0.0440563738704536
chr12	108732994	108733791	0.000272180843122649	0.649	0.000875894163747237	0.963	0.0500900869643197
chr8	38964784	38965492	0.000364215095552209	0.751	0.000871710788636803	0.963	-0.0209039165564153
chr17	40718952	40719654	0.000413631214044218	0.799	0.000879293156024465	0.964	-0.0169002463505046
chr19	52407881	52408371	0.000446313832094488	0.828	0.000918250836740387	0.97	0.0169501328744251
chr5	110074725	110075285	7.68695176542352e-05	0.249	0.000954332447067885	0.971	-0.0228995313959513
chr5	140864020	140864834	0.000468799473313074	0.84	0.000946488618735821	0.971	0.0336258478013134
chr17	77923971	77925136	0.000482133981477584	0.85	0.000960607509733537	0.973	0.0570336385207375
chr2	238395764	238395947	2.71919382178247e-05	0.1	0.000994597432505818	0.975	0.0477403987178413
chr1	167090618	167091161	0.000188251879969555	0.508	0.00106205435616158	0.977	0.0389676350269194
chr10	135341528	135342936	0.000380164213160741	0.762	0.00104767400421946	0.977	0.0192497212895021
chr2	1746647	1748617	0.000521353123137908	0.872	0.00101969768316843	0.977	0.0178527615447067
chr14	94789681	94790112	3.45128446610852e-05	0.125	0.00109552135704505	0.981	0.069606416562757
chr9	36258114	36258885	0.000208907294577326	0.549	0.00111879138109684	0.982	0.0189568609587958
chr17	32682770	32683481	3.86962197715197e-05	0.138	0.00114807500686989	0.985	0.0644631605563587
chr2	133428422	133429088	0.000447098214927694	0.81	0.0011499052334807	0.985	0.035710015978027
chr17	32580869	32581466	6.79798455445617e-06	0.026	0.00117762009358733	0.989	0.0818049742663907
chr1	153013573	153014367	6.79798455445617e-06	0.026	0.00119147752364064	0.989	0.0824737306893064
chr1	3623102	3623859	0.000127592940868254	0.379	0.00118284931247537	0.989	0.0613573996650726
chr9	116811229	116812388	0.000127854401812656	0.38	0.00118363369530858	0.989	0.045818836484395
chr5	63986130	63987010	0.000129161706534667	0.381	0.00119147752364064	0.989	-0.0265488492562817
chr8	86840929	86841010	7.32090644326049e-06	0.028	0.00122023822752488	0.99	0.0504179415678294
chr12	41085901	41086879	0.000499128942863724	0.857	0.00134939993405955	0.992	-0.0211448160613948
chr10	97849481	97850343	0.000543838764356494	0.87	0.00129109414345787	0.992	-0.0226078666693154
chr6	127664470	127665315	0.000724508276938387	0.928	0.00131096517523243	0.992	-0.0225924044243033
chr19	57741988	57742444	0.000707774776496648	0.936	0.00139332537271911	0.994	-0.0259676856157719
chr3	57743163	57743599	7.11173768773876e-05	0.239	0.00146810320281813	0.995	0.0479798380395371
chr4	104640489	104641319	0.000518738513693886	0.871	0.00142182461565895	0.995	-0.0287987736616327
chr16	49671991	49672687	1.93481098857599e-05	0.074	0.00159072838574274	0.997	0.0690729462489077
chr11	70961596	70961902	8.68050335415173e-05	0.279	0.0015854991668547	0.997	-0.0460860185419626
chr1	20616440	20617456	0.000795364192871372	0.946	0.00161216818318372	0.997	0.0346028429765738
chr11	3663198	3663801	0.000782029684706862	0.954	0.00157216465869019	0.997	0.0117519325516476
chr6	32820862	32820999	0.000930539501127289	0.973	0.00159282007329796	0.997	0.0234247508322938
chr6	28411030	28411423	0.00093916771229256	0.974	0.00160563165957367	0.997	0.0134314431403537
chr14	23835212	23836012	2.53617116070096e-05	0.096	0.00169635860728122	0.998	-0.0464194013040636
chr6	28834480	28834513	0.000112166745148527	0.341	0.001742375733496	0.998	-0.0326792933814842
chr9	98783308	98784351	0.000322119883503462	0.701	0.00175283417127208	0.998	-0.0257965800568497
chr21	27107221	27107221	0	0	0.0024326326267177	1	0.125628909653339
chr1	243053673	243053673	0	0	0.00379379830327535	1	0.0953717762838026
chr13	23489940	23489940	0	0	0.00402676000473767	1	-0.0807035535982839
chr2	144500981	144501227	2.6146094440216e-07	0.001	0.00360345473575057	1	-0.0822020225224065
chr17	32611290	32612007	2.09168755521728e-06	0.008	0.00185349663486692	1	0.0909571335330844
chr2	73461528	73461528	2.09168755521728e-06	0.008	0.0065106389765582	1	0.0395530483774482
chr16	49802060	49802298	1.07198987204886e-05	0.041	0.00269487795395307	1	0.068794776676449
chr2	145236966	145237379	1.33345081645102e-05	0.051	0.0069104127605491	1	-0.0613936977154196
chr14	89878619	89878619	1.38574300533145e-05	0.051	0.00875423534047313	1	0.121042033111427
chr16	89557657	89557657	1.43803519421188e-05	0.052	0.00879763785724389	1	0.0587985660524457
chr2	27851430	27851430	2.1178336496575e-05	0.078	0.00932944941815789	1	-0.0812821598357628
chr11	14214472	14214472	2.19627193297815e-05	0.081	0.00943690986630718	1	0.117377598599219
chr17	65717569	65717569	2.37929459405966e-05	0.087	0.00957600708872912	1	0.105360021022264
chr11	13983009	13983705	2.37929459405966e-05	0.09	0.00332944366601711	1	0.0795471796979322
chr1	3622085	3622130	2.71919382178247e-05	0.101	0.00799730590642888	1	0.0744624423190563
chr11	13989610	13989610	3.00680086062484e-05	0.107	0.00982491790779998	1	0.130128841904081
chr1	152813850	152814273	3.05909304950528e-05	0.112	0.00819497038039691	1	0.0780723314832928
chr1	223900693	223900822	3.08523914394549e-05	0.113	0.00819732352889653	1	0.0571548871010026
chr17	14202916	14203189	3.45128446610852e-05	0.123	0.00364790309629894	1	0.0381181775185181
chr1	45190262	45190519	3.79118369383133e-05	0.135	0.00370908495728905	1	-0.0459812607282601
chr8	42356637	42356871	3.81732978827154e-05	0.136	0.00375301039594861	1	0.0558312717085471
chr14	99728984	99729088	3.84347588271176e-05	0.137	0.00375693231011464	1	0.0784457851075923
chr1	5661803	5661886	4.0787907326737e-05	0.144	0.00859029932833298	1	0.0593611129436202
chr9	138375675	138376074	4.18337511043457e-05	0.148	0.00863553207171455	1	0.0768433558646548
chr12	53171017	53171191	4.70629699923889e-05	0.163	0.00886326455428884	1	0.0691703583883465
chr4	39529342	39529342	4.99390403808126e-05	0.169	0.0107107475874345	1	-0.0583737255689637
chr5	43289541	43289541	5.90901734348882e-05	0.195	0.0110080286812198	1	0.061758329363004
chr14	94856984	94857275	6.51037751561379e-05	0.223	0.00233458477256689	1	0.0705056248942985
chr20	26188971	26189240	6.51037751561379e-05	0.223	0.00233824522578852	1	-0.0549452063268427
chr1	153114690	153114766	7.26861425438006e-05	0.244	0.00976896526569792	1	0.0634951976626067
chr1	121260892	121260900	7.8176822376246e-05	0.26	0.00993891487955932	1	-0.0399350249317176
chr11	59318136	59318494	8.00070489870611e-05	0.265	0.00997891840405285	1	-0.0226229116499904
chr12	130618547	130618620	8.26216584310827e-05	0.271	0.00458184158970346	1	0.055330908571588
chr12	108714854	108715309	8.26216584310827e-05	0.271	0.00458341035536987	1	0.0617465103570841
chr5	528580	528962	8.70664944859194e-05	0.285	0.00465740380263568	1	0.0322366885092676
chr17	36103036	36103289	8.91581820411367e-05	0.294	0.00258349559163775	1	-0.0472254722723757
chr12	130589151	130589287	0.000102492690205647	0.326	0.00491023653587257	1	0.0620063253103771
chr15	101936156	101936156	0.000120010573480592	0.342	0.0126460814978993	1	-0.0736779812198209
chr19	39051817	39052112	0.000116873042147766	0.359	0.00507966322784517	1	-0.0457285552729276
chr9	138377834	138377993	0.000117918885925374	0.359	0.010983451352446	1	0.0622482150153352
chr16	49686567	49686662	0.000119226190647385	0.366	0.00510162594717495	1	0.0696876531357078
chr4	1008614	1008738	0.000127331479923852	0.383	0.0111604604118062	1	-0.0262923845947439
chr12	53085038	53085038	0.00014040452714396	0.386	0.0130950099394378	1	-0.0426556705205833
chr1	245836513	245836835	0.000130207550312276	0.39	0.00521797606743392	1	0.0396631059334371
chr1	152941727	152942688	0.00013674407392233	0.394	0.00187389058853028	1	0.0529893192945498
chr16	49594026	49594482	0.000135698230144721	0.4	0.0113233505801688	1	0.0585611129953766
chr2	51057218	51057548	0.000141973292810373	0.41	0.0114417923879829	1	0.059506109355532
chr2	51074881	51074939	0.000143280597532384	0.414	0.011476305232644	1	0.0544023097786667
chr7	104624178	104624890	0.00014641812886521	0.415	0.00190944927696898	1	0.025600753527981
chr1	152768267	152768727	0.000147202511698416	0.426	0.00538766422035092	1	0.0664906547032296
chr16	49669842	49670437	0.000152170269642057	0.436	0.00545538260495108	1	0.0663317581657075
chr17	32612799	32613298	0.000160798480807329	0.448	0.0117260004345481	1	0.05193659796152
chr5	95047004	95047004	0.000170995457639013	0.453	0.0136163630625757	1	-0.0742395122649634
chr2	144698389	144698389	0.000170995457639013	0.453	0.0136189776720197	1	-0.0737724397834276
chr10	42864633	42864912	0.000168903770083796	0.463	0.0118925510561323	1	0.0568049492197911
chr12	24102581	24102832	0.000178054903137871	0.48	0.00329597666513363	1	-0.0555219619900084
chr2	238173365	238173584	0.000184852887692327	0.493	0.0121869560795291	1	0.0698752546685127
chr17	32575548	32575548	0.000197925934912435	0.508	0.0140652915041142	1	0.11031287852411
chr10	80588621	80588828	0.000190866489413577	0.514	0.00580443296572796	1	0.0587336509282488
chr3	197282220	197282902	0.000193219637913197	0.517	0.00581672163011486	1	0.0315303851477018
chr2	208632434	208632990	0.000194526942635207	0.517	0.00582430399750253	1	0.0400968121752184
chr8	126011549	126012434	0.000202893692856076	0.523	0.00341520285578102	1	0.0402639133423637
chr8	42395162	42395557	0.000200017622467653	0.524	0.0124311606016007	1	0.0523870565229628
chr19	991161	991359	0.000200540544356457	0.524	0.0124392658908772	1	0.0521872809825237
chr3	13974286	13974800	0.00020812291174412	0.534	0.00593934681303948	1	-0.0465109260973309
chr12	130599593	130599729	0.000208907294577326	0.534	0.00594797502420475	1	0.0592727674698644
chr19	40871557	40871823	0.000209168755521728	0.534	0.00594823648514915	1	0.0269762993433764
chr1	86861147	86861232	0.000209953138354935	0.535	0.00595294278214839	1	0.0444476508998808
chr1	3621015	3621445	0.000217535505742597	0.547	0.00599660675986355	1	0.0637586877553628
chr1	152880108	152880324	0.000214659435354174	0.548	0.0126319626069016	1	0.0573149722613301
chr2	144582331	144582331	0.000229301248240695	0.554	0.0145299076023169	1	-0.103229634165042
chr11	14128237	14128237	0.000231915857684716	0.557	0.0145717413534212	1	0.0931212255154251
chr16	32895392	32895392	0.000233223162406727	0.558	0.0145978874478614	1	0.103872066349115
chr1	153030514	153030594	0.000229301248240695	0.566	0.00609125562173713	1	0.0507088620532805
chr7	28449474	28450001	0.000244204522071618	0.588	0.00620106921838604	1	-0.0233412029519811
chr19	55973320	55973338	0.000247864975293248	0.601	0.0131224633386	1	0.0178416387498419
chr11	13987766	13987766	0.000265121397623791	0.603	0.0150384491391791	1	0.108336170353684
chr2	144664540	144664540	0.000276102757288681	0.619	0.0151678723066581	1	-0.0781488448248728
chr1	181478149	181478161	0.000266690163290204	0.622	0.0133700668529489	1	0.0610047226745456
chr6	26225258	26225389	0.000268781850845421	0.626	0.00635454679275011	1	0.0322024120858716
chr1	152957018	152957379	0.000268781850845421	0.626	0.0133841857439466	1	0.0449357501032488
chr14	45267631	45267997	0.000275318374455475	0.63	0.0134882471998187	1	-0.0654571997825797
chr16	56651356	56651367	0.000287868499786779	0.646	0.013627605883185	1	0.0341975436973219
chr17	32582516	32582828	0.0002904831092308	0.648	0.0136689167124005	1	0.0399182215141158
chr8	144361073	144361315	0.000293882101508028	0.651	0.0136932325802299	1	0.0255340435749396
chr20	22401074	22401407	0.00029649671095205	0.668	0.00386570006298594	1	0.0644447354398242
chr12	4337382	4337404	0.000305386383061723	0.669	0.0138438340842056	1	0.063708632639262
chr4	1303317	1303710	0.000309046836283354	0.677	0.00662228279981792	1	0.0303921843798998
chr8	86934762	86934762	0.000327872024280309	0.685	0.0157566823534518	1	0.0822710871949427
chr1	3477690	3477695	0.000323427188225472	0.689	0.01404306732384	1	0.0439776387353069
chr8	49783505	49783907	0.000321074039725853	0.692	0.00671300974752547	1	0.0565582834276239
chr1	152849738	152849783	0.000333101243168352	0.7	0.0141439912483793	1	0.0534614057561504
chr22	50118767	50118821	0.000333885626001559	0.701	0.014155495529933	1	0.0282965181982124
chr1	209406345	209406725	0.000334670008834765	0.702	0.0141604632878766	1	0.0296818451391896
chr12	2113119	2113664	0.00033650023544558	0.704	0.00256963816158443	1	-0.0228630997212532
chr5	49737236	49737349	0.000340683610556015	0.706	0.0142205993050891	1	-0.0305748037545893
chr19	3285973	3286244	0.000331271016557537	0.712	0.00400165975407506	1	0.0361586045174793
chr17	32596886	32596886	0.000358985876664166	0.714	0.0161044254095067	1	0.10438052001174
chr19	38307803	38308263	0.00033650023544558	0.719	0.00402257662962724	1	-0.0508468869367237
chr12	38546326	38546326	0.000366829704996231	0.721	0.0161888772945486	1	-0.0566619775478212
chr1	174967663	174968144	0.000350619126443297	0.723	0.002613563600244	1	-0.039158892058628
chr9	98787613	98788085	0.000363692173663405	0.726	0.0144329055919437	1	0.0492649400022152
chr2	208631081	208631916	0.000345389907555254	0.728	0.00406310307600957	1	0.0454938184287489
chr2	214149195	214149425	0.000351403509276504	0.73	0.00688531250988649	1	-0.0294751300641028
chr21	10991412	10991482	0.000369967236329057	0.731	0.0145048073516543	1	-0.0469279468741332
chr8	86842690	86842690	0.000377288142772317	0.731	0.0162725447967573	1	0.0903209364619308
chr6	28616368	28616678	0.000355063962498134	0.735	0.00410336806144751	1	0.0329719388521905
chr1	3668909	3669280	0.00035820149383096	0.735	0.00411095042883517	1	0.0571591827597469
chr7	154997031	154997361	0.000356894189108949	0.736	0.00691459613565953	1	0.0296652557151444
chr13	85468943	85468980	0.00037885690843873	0.736	0.0146104375731927	1	0.0377947840073057
chr8	86976101	86976101	0.000383301744493567	0.738	0.0163415704860794	1	0.106261921351048
chr11	17803160	17803421	0.000363692173663405	0.741	0.00413500483572017	1	0.0470384252791664
chr7	98739496	98740022	0.000374934994272698	0.746	0.00267265377367888	1	0.0360464974702548
chr7	30635712	30636176	0.000378072525605524	0.751	0.00268075906295535	1	0.0365339011640957
chr14	37131329	37131601	0.000372058923884274	0.756	0.00699277295803578	1	-0.0427264162564051
chr16	49525139	49525304	0.00037885690843873	0.76	0.00703512963102893	1	0.0712493885372995
chr6	55009423	55009445	0.000414154135933022	0.763	0.014962364004358	1	-0.055809462622692
chr16	31711784	31712342	0.000397682096435686	0.768	0.00189454600313805	1	-0.0179120395927435
chr18	31020627	31020806	0.000387485119604002	0.77	0.00707225708513404	1	-0.0359186415502823
chr20	34319899	34319899	0.0004235667299315	0.775	0.0167251336915174	1	0.0757574229680098
chr3	127794706	127794831	0.000437947081873619	0.78	0.0151882662603215	1	0.027646514245033
chr12	130590137	130590671	0.000416245823488239	0.783	0.00193219637913197	1	0.0392202493446496
chr17	32645748	32646156	0.000409186377989381	0.785	0.00276024319005361	1	0.0377375162216659
chr10	65028929	65029168	0.000410755143655794	0.785	0.00276259633855323	1	0.0218816495217308
chr12	52967554	52968145	0.000422259425209489	0.79	0.0043326693096882	1	0.0569552355297375
chr1	27338978	27339413	0.000434025167707586	0.797	0.00437319575607054	1	0.0378444701887427
chr15	93122918	93123385	0.000445267988316879	0.806	0.004405355452232	1	0.0494400120477734
chr3	16428391	16428391	0.000465661941980248	0.809	0.0171102656626218	1	-0.0955355756365538
chr10	50146962	50146991	0.000478996450144758	0.817	0.0155775816065363	1	0.0614842578107834
chr4	46995637	46995821	0.00046357025442503	0.82	0.00201011174056381	1	-0.0325517305511405
chr14	37641261	37641726	0.000468276551424269	0.821	0.00201952433456229	1	-0.0326637486021945
chr17	59480470	59480926	0.000468015090479867	0.824	0.00448510104027466	1	0.0351573370646051
chr2	133176249	133176249	0.000490239270754051	0.827	0.0173372137623629	1	-0.100882669374977
chr3	167813648	167814123	0.000500174786641333	0.839	0.00761766461515694	1	-0.0247503812886552
chr15	100881162	100881458	0.000517431208971875	0.843	0.0158761700050436	1	0.023271989093862
chr11	1283875	1283970	0.000516646826138669	0.848	0.00767727771048064	1	0.0245563027796915
chr14	95027692	95028105	0.000517169748027473	0.848	0.00768041524181346	1	0.0613031642716257
chr12	52760975	52761416	0.00052161458408231	0.85	0.00210763667282581	1	0.0441463067338215
chr12	132905735	132906443	0.000522921888804321	0.851	0.00301569053273452	1	0.0283692263541817
chr16	34740585	34741966	0.000549852366077743	0.86	0.00216149762737266	1	-0.0372262024675377
chr5	77146796	77147141	0.000540178311134863	0.862	0.00778944445562916	1	-0.0347271303338932
chr8	143695529	143695827	0.000540178311134863	0.862	0.00779022883846237	1	0.0252680520203462
chr9	116817641	116817641	0.000556650350632199	0.862	0.0179288998795449	1	0.0973756996807503
chr2	214148856	214148976	0.000557173272521004	0.863	0.00217457067459277	1	-0.0157893167762299
chr16	88482273	88482940	0.00055795765535421	0.867	0.00308916105811153	1	0.062424195949458
chr17	63823864	63823962	0.000561879569520243	0.868	0.0161946294353254	1	0.0468917492143615
chr4	7131061	7131478	0.000566324405575079	0.869	0.00310092680060962	1	0.0520591919622755
chr2	144271431	144271431	0.000571030702574318	0.871	0.0180452499998039	1	-0.097324468838945
chr1	153112816	153113262	0.000576259921462362	0.873	0.0163062732585851	1	0.0469444396567341
chr17	36103953	36104218	0.000568416093130297	0.874	0.00790474873211052	1	-0.0381296782973231
chr17	32595801	32595801	0.000580181835628394	0.874	0.0181346696427894	1	0.10190676559043
chr15	101099284	101099284	0.000585672515460839	0.875	0.0181741502453942	1	-0.0546197354275901
chr1	18971872	18972430	0.000578090148073177	0.877	0.00794187618621562	1	0.0584190430899552
chr7	1572252	1572571	0.000584365210738829	0.879	0.00797455880426589	1	0.019638952387013
chr5	104728220	104728427	0.000588287124904861	0.879	0.0163789594011289	1	0.0221934147459066
chr21	37442104	37442777	0.000588025663960459	0.881	0.00222607848063999	1	-0.0195250761260815
chr7	1209495	1209742	0.000596130953236926	0.882	0.00802188323520268	1	0.0233341527740448
chr2	144535905	144535905	0.000608419617623827	0.882	0.0183783512429723	1	-0.084320693035839
chr12	125412894	125413164	0.000568154632185895	0.884	0.00477662999328307	1	0.0426133347553418
chr4	129732568	129732568	0.000634304251119641	0.886	0.0185809834748839	1	0.0377836692166246
chr4	107725	107995	0.000608942539512632	0.887	0.00806397844725143	1	-0.0412848669427705
chr8	70745342	70745466	0.000647638759284151	0.896	0.0168025261310604	1	-0.0286245226464518
chr17	9940970	9941095	0.000654959665727412	0.897	0.0168506349448304	1	0.0667917166230447
chr15	79381805	79381867	0.000656789892338227	0.898	0.016871813281327	1	0.0289859559565844
chr7	27183806	27184077	0.000569723397852307	0.899	0.00189506892502686	1	-0.0110770605536762
chr1	15127680	15127907	0.000611295688012251	0.899	0.00489010404315361	1	0.0601188156330467
chr12	53013048	53013344	0.000635088633952848	0.899	0.00817483788767795	1	0.0580943909269117
chr17	41382128	41382237	0.000652083595338988	0.9	0.00327009203163782	1	-0.0330438770114235
chr8	599525	600555	0.000612602992734262	0.901	0.00182630469664909	1	0.0253768354772025
chr6	75884800	75884860	0.000640840774729695	0.901	0.00819784645078534	1	-0.0449476212798933
chr9	23821566	23821570	0.000678752611668008	0.904	0.017012217808471	1	-0.0530331646720626
chr8	94508150	94508434	0.000654959665727412	0.905	0.0082422948113337	1	-0.0304950809992494
chr3	186953699	186953727	0.000682413064889639	0.905	0.0170493452625761	1	0.0335437597880797
chr12	115130855	115130994	0.000657312814227031	0.906	0.00825536785855381	1	-0.022335878862051
chr5	44389406	44389848	0.000662280572170672	0.907	0.00827628473410599	1	-0.0326491729069702
chr1	4714672	4715615	0.000628552110342794	0.91	0.00184643718936806	1	0.0191153522981031
chr19	23653837	23654274	0.000673000470891161	0.912	0.00831524241482191	1	-0.0278896325362766
chr6	168936486	168936684	0.00065600550950502	0.913	0.00500671562435697	1	-0.0315392528773188
chr16	89883988	89884179	0.000665941025392302	0.913	0.00503129295313077	1	0.0461807029813522
chr21	22373039	22373039	0.000705421627997029	0.913	0.0190476912606418	1	0.0948904976230836
chr17	46618919	46620300	0.000693655885498932	0.916	0.00238138628161488	1	-0.0286398330272911
chr2	230785050	230785180	0.000681890143000834	0.916	0.00834478750153935	1	0.0301903231607865
chr19	21769190	21769736	0.000676138002223987	0.917	0.0050590078132374	1	-0.0406934848613766
chr4	57334163	57334163	0.000740195933602516	0.919	0.0193028771423783	1	-0.0322213599319821
chr19	15281200	15281607	0.000754314824600233	0.921	0.00345912829444058	1	0.0345450052982931
chr10	95848649	95848841	0.000697839260609366	0.924	0.00511077708022903	1	-0.0378266006713
chr1	209406063	209406063	0.000797194419482187	0.926	0.0196955914808703	1	0.0818583525698967
chr6	168954578	168954782	0.000759021121599472	0.929	0.0175659920887147	1	-0.0360585862625725
chr1	19276236	19276353	0.000774970239208003	0.93	0.0176763286072525	1	0.030460598553616
chr10	80063568	80063791	0.000777061926763221	0.931	0.0176920162639166	1	0.0592137749900327
chr6	168901167	168901202	0.000780722379984851	0.931	0.0177207769678008	1	-0.0318186963316532
chr10	117886935	117887197	0.000783598450373275	0.932	0.0177474459841298	1	-0.0403623078988954
chr14	95047591	95048102	0.000793011044371753	0.933	0.00352841544470715	1	0.0371322818396234
chr14	95046342	95046934	0.000736796941325288	0.934	0.00855317187422787	1	0.047743610902934
chr14	94808883	94808883	0.000825693662422023	0.934	0.0198788756028963	1	0.0968780059905836
chr17	21220055	21220360	0.000747516840045777	0.935	0.00858611595322255	1	-0.0309631889985252
chr16	34726734	34726856	0.000804515325925448	0.936	0.0178902036597734	1	-0.0342669141788282
chr11	86383464	86383585	0.000827000967144033	0.938	0.00358698269625324	1	0.0199861196114373
chr8	2831994	2832078	0.00078176822376246	0.939	0.00870795675331395	1	0.038307019804375
chr1	152783137	152783674	0.000782552606595666	0.939	0.00870874113614716	1	0.0486205555158623
chr2	26570033	26570144	0.000819680060700773	0.939	0.0179898202795906	1	0.0342087007539281
chr6	75795679	75796125	0.000822294670144794	0.94	0.018006292319088	1	-0.0450065647290659
chr8	143820035	143820828	0.00079274958342735	0.941	0.0087380247619202	1	0.0264316811455158
chr10	125923337	125923376	0.000855761671028271	0.942	0.0182010807226676	1	0.0395704315166506
chr3	117158482	117158482	0.000863344038415934	0.943	0.0201212498983571	1	-0.0795460925997546
chr2	27851776	27851776	0.000864389882193542	0.943	0.0201309239532999	1	-0.0353095599069405
chr11	2562310	2562647	0.000800331950815013	0.944	0.00875972602030558	1	-0.0311726908953954
chr16	30596419	30596551	0.000880861921690878	0.945	0.0183686771880294	1	0.0361292166420846
chr2	160918519	160918675	0.000881123382635281	0.945	0.018371030336529	1	0.0314750751154985
chr13	23500153	23501457	0.000755622129322244	0.946	0.00200697420923098	1	-0.0448672796214502
chr5	140052017	140053068	0.000805038247814252	0.946	0.00531576246064032	1	-0.0421079574035498
chr16	88492755	88492868	0.000885045296801313	0.946	0.0183974378919136	1	0.066153424861278
chr14	102554826	102554977	0.000823079052978001	0.948	0.00535864205552228	1	-0.0328963474769522
chr17	59473456	59473707	0.000833014568865283	0.948	0.00886614062467726	1	0.0243501796844726
chr12	133022423	133022955	0.000819941521645175	0.95	0.00256467040364079	1	0.0275692868195895
chr2	145051829	145051829	0.000883999453023704	0.95	0.0202509345267805	1	-0.0563385441565457
chr4	108745557	108745587	0.000916943532018377	0.952	0.018588827303216	1	0.0362212711558298
chr16	1991308	1991447	0.000920342524295605	0.952	0.0186066066474353	1	0.0376350208131074
chr14	95156546	95157685	0.000828046810921642	0.954	0.00257329861480606	1	0.0511756426003482
chr2	240168836	240169280	0.000830922881310066	0.954	0.00257669760708329	1	0.0297384153939252
chr8	119122430	119123054	0.000873541015247618	0.954	0.00898222928399182	1	0.0265813460071788
chr17	79881066	79881543	0.000857591897639086	0.955	0.00261774697535443	1	0.0383360983219496
chr2	144359756	144359756	0.000947795923457831	0.957	0.0206290070523861	1	-0.0911338636807181
chr2	154728202	154728468	0.000888444289078541	0.958	0.00550558310627629	1	-0.0305967815073549
chr2	133430101	133430560	0.000940736477958973	0.958	0.00918067814079306	1	-0.0379590910239637
chr15	70126655	70126776	0.000949364689124244	0.958	0.0187739416518527	1	0.0514804750076635
chr14	65068527	65068635	0.000966098189565983	0.96	0.0188795718733912	1	-0.0417137870995639
chr1	230491641	230491641	0.000961914814455548	0.96	0.0207111057889283	1	0.114506380008477
chr5	147763501	147763705	0.000973680556953645	0.962	0.00382726530415882	1	0.0196618364891368
chr12	86230557	86230957	0.000960607509733537	0.962	0.00923166302495148	1	-0.0400557958384452
chr10	73976790	73976821	0.000967144033343591	0.963	0.00925414866617007	1	0.0361725396068753
chr12	54070378	54070891	0.000890535976633758	0.964	0.00218319888575804	1	-0.0305622380393341
chr17	44896877	44897431	0.000946750079680223	0.964	0.00562402491409047	1	-0.0276787576934369
chr1	150692971	150693482	0.000898902726854627	0.965	0.00219339586258972	1	-0.0406005477441403
chr15	31515852	31516481	0.000921911289962018	0.965	0.002227385785362	1	0.0362045620635478
chr1	46088336	46089045	0.000989629674562177	0.965	0.00384295296082295	1	-0.0374818556778198
chr2	144996219	144996219	0.000999826651393861	0.966	0.0209145224036732	1	-0.0612531227041948
chr11	504784	504937	0.00100061103422707	0.968	0.00385576454709866	1	0.0151028996615035
chr11	115372874	115373119	0.000973942017898048	0.968	0.00568102339997014	1	0.0351937012580603
chr8	67344642	67345006	0.00101185385483636	0.969	0.00387119074281839	1	0.0102295634656526
chr1	20492386	20492604	0.00102126644883484	0.969	0.0192079668195603	1	0.0445441918890145
chr16	30597058	30597528	0.00102335813639006	0.97	0.00283371371543061	1	0.0212522758963888
chr7	74020819	74021054	0.00101002362822555	0.97	0.00937049878642903	1	0.0312300295686433
chr5	1859764	1860135	0.00101342262050277	0.971	0.00574795740173709	1	0.0377217412973696
chr12	130572394	130572734	0.00102989466000011	0.971	0.00942279097530946	1	0.0446033460947697
chr6	168983411	168983500	0.00103094050377772	0.971	0.00942383681908707	1	-0.0309627596145464
chr6	39508479	39508853	0.0010283258943337	0.971	0.0192401265157218	1	0.0412722349623305
chr8	75735552	75735733	0.00103878433210978	0.971	0.0192921572436578	1	-0.0324750319431577
chr7	27136424	27136486	0.0010406145587206	0.971	0.0193065375955999	1	-0.0318928129144442
chr11	755608	755658	0.00105002715271908	0.971	0.0193481098857599	1	-0.0405994518013121
chr10	99160096	99160130	0.00105002715271908	0.971	0.0193502015733151	1	0.0314490686894954
chr3	114790477	114790596	0.00105185737932989	0.971	0.0193619673158132	1	-0.039593933327045
chr13	25081063	25081296	0.00107015964543804	0.971	0.0194406670600782	1	-0.0289825861441185
chr14	94858066	94858339	0.0010766961690481	0.971	0.0194785788970165	1	0.0565365565655505
chr1	3449825	3450227	0.0010772190909369	0.971	0.0194822393502382	1	0.0542025684629258
chr1	230492737	230492944	0.00102205083166805	0.972	0.00576495236312323	1	0.0415892670682624
chr2	237489107	237489920	0.00102440398016766	0.972	0.00577201180862209	1	0.0448979699837758
chr14	105617080	105617308	0.00104819692610826	0.972	0.0094643632654694	1	0.0414833760254074
chr8	11059029	11059277	0.00101472992522478	0.974	0.00233301600690048	1	-0.0306760279777865
chr6	159359940	159360705	0.00105107299649668	0.974	0.00581619870822606	1	0.0392929479045435
chr2	25384293	25384809	0.00107277425488206	0.975	0.00586169291255203	1	-0.0337508100083699
chr8	49835988	49836230	0.00107774201282571	0.975	0.00587581180354975	1	0.0460909773477911
chr19	38993211	38993534	0.0010892462943794	0.975	0.00588862338982546	1	-0.0254369061793701
chr11	86142104	86142587	0.0011015349587663	0.975	0.00591006318726643	1	-0.0408002125408573
chr5	178052235	178052578	0.00111016316993157	0.975	0.0196464368233227	1	0.0376639009604527
chr17	55344913	55344950	0.00113317173303896	0.976	0.0197667088577477	1	0.0464713972767268
chr1	5809346	5809461	0.00114885938970309	0.976	0.0198393950002915	1	0.0442718799515422
chr17	21825321	21825355	0.00115931782747918	0.976	0.0198901184235055	1	-0.042803868113252
chr1	153321907	153322488	0.00109159944287902	0.977	0.00956947056511907	1	0.0462637773269804
chr15	65116194	65116557	0.0011017964197107	0.977	0.00958986451878244	1	0.0298677295646001
chr8	57232395	57232601	0.00116873042147766	0.977	0.0199421491514416	1	0.0272301709795626
chr16	49902342	49902436	0.00118128054680896	0.977	0.0200030695514873	1	0.0436255219471795
chr19	53038972	53039444	0.00118441807814179	0.977	0.0200192801300402	1	-0.0582363512311959
chr1	201708500	201709336	0.000926617586961256	0.979	0.00207599989855315	1	-0.0300072454206015
chr22	49487343	49487534	0.00114127702231543	0.979	0.0096816373102676	1	0.045835595859489
chr2	81708633	81708953	0.00115748760086836	0.979	0.00972216375664993	1	-0.041335512378135
chr1	152881815	152882420	0.0011614095150344	0.979	0.00973340657725922	1	0.0524695590615313
chr17	9940004	9940227	0.0011621938978676	0.979	0.00973523680387004	1	0.0514995092563769
chr10	80746999	80746999	0.00109996619309989	0.979	0.0214899979423024	1	0.0888847449647225
chr4	77341841	77342788	0.00111774553731924	0.98	0.00294823360907876	1	-0.0382727489624666
chr6	72596291	72596698	0.0011261122875401	0.98	0.00295843058591044	1	0.0178311749589194
chr6	78362057	78362377	0.00121291732108162	0.98	0.0201290937266891	1	-0.0281807798957908
chr13	36919344	36919409	0.00126050321296282	0.981	0.0203215289817691	1	0.0321448175014749
chr1	209008498	209008498	0.00117814301547613	0.981	0.0219242845709544	1	0.0916370257963611
chr2	133423194	133423194	0.0011862483047526	0.981	0.0219629807907259	1	-0.0785450781495288
chr8	144660157	144660772	0.00116611581203364	0.982	0.00250113539415107	1	0.0151611828567438
chr1	3630882	3630882	0.00120115157858352	0.983	0.0220652120199871	1	0.0964172874916793
chr12	52714864	52715691	0.00124743016574271	0.984	0.00311478423066294	1	0.039250383805702
chr12	3782889	3783474	0.00109447551326744	0.984	0.00399773783990903	1	0.0377024421169875
chr6	28829378	28829401	0.00117814301547613	0.984	0.00604889894874398	1	-0.0254359814171238
chr1	3617661	3617886	0.00124350825157667	0.984	0.00992924082461644	1	0.0555062124650024
chr5	51426	51898	0.0012589344472964	0.984	0.00996113905983351	1	0.0387032820600128
chr22	23523942	23524136	0.00133711126967265	0.984	0.0206846982335437	1	0.0524975714124676
chr14	94776986	94776993	0.00134051026194988	0.984	0.0207053536481515	1	0.0365393006777216
chr14	95105801	95106170	0.00135645937955841	0.984	0.0207673198919748	1	0.0611917028709171
chr1	20658462	20658612	0.00138705031005346	0.985	0.0209024952002307	1	0.0357893498024687
chr21	38592612	38593754	0.00124978331424233	0.986	0.00214764019731935	1	-0.0226910346511544
chr2	51254021	51254170	0.00124403117346548	0.986	0.00616498760805854	1	0.0407605515478078
chr8	91014265	91014327	0.00139489413838553	0.986	0.0209307329822261	1	0.00905172553872302
chr14	96180319	96180826	0.00126102613485162	0.987	0.00216202054926146	1	0.0209218264410488
chr11	86383182	86383300	0.00128115862757059	0.987	0.00315295752854565	1	0.021757738871339
chr6	133119453	133120000	0.00129841504990113	0.987	0.00317727339637505	1	0.0099519238312107
chr1	3605747	3606082	0.00122416014169092	0.987	0.00418572825893419	1	0.0489926035369715
chr10	82295394	82296072	0.00125631983785238	0.987	0.00423148392420456	1	-0.0212411662218059
chr1	149871503	149871945	0.00125998029107401	0.987	0.00619244100722077	1	-0.0291210411647512
chr1	153175842	153176083	0.00143568204571226	0.987	0.0211179390184181	1	0.0472515411050225
chr12	71003822	71003836	0.00143672788948987	0.987	0.0211226453154173	1	-0.0276722060628339
chr19	55972791	55973099	0.00126939288507249	0.988	0.00620969742955131	1	0.0152861692949322
chr8	144255650	144255688	0.00131645585506488	0.988	0.0101049425792547	1	-0.0193611140348466
chr12	2613914	2613948	0.00132717575378537	0.988	0.0101240292281961	1	0.032589464062252
chr14	95477582	95477946	0.00153242259514106	0.989	0.0215506568814037	1	0.0576456965282124
chr10	126137924	126138879	0.00123592588418901	0.99	0.00210214599299337	1	0.00200024167597579
chr14	98012817	98013058	0.00138469716155384	0.99	0.0102722775836721	1	0.041051932341287
chr1	7466976	7466976	0.00137266995811134	0.99	0.0229379686524015	1	0.0724020565833909
chr1	17287291	17287291	0.00138992638044188	0.99	0.0230284341391647	1	-0.0693365468620737
chr12	38449116	38449116	0.0014035223495508	0.99	0.0230932764533764	1	-0.0618185759810194
chr10	80339185	80339185	0.00141502663110449	0.99	0.0231591646113658	1	0.0891095310453529
chr21	27945125	27945413	0.00157608657285622	0.991	0.0217130241278774	1	-0.0334830162854023
chr17	45944339	45944385	0.00159203569046475	0.991	0.0217755132935895	1	0.0649642707761421
chr6	32632937	32632957	0.00160589312051807	0.991	0.021836956615524	1	-0.0258034201757121
chr18	44334713	44335109	0.00160824626901769	0.991	0.0218414014515789	1	0.0425991852520164
chr6	3356384	3356535	0.00162419538662622	0.991	0.0219046750001242	1	0.0213647527518748
chr7	25702709	25702848	0.00162419538662622	0.991	0.021906505226735	1	0.0445352526336253
chr17	32569640	32569640	0.00142731529549139	0.991	0.0232245298474663	1	0.0869911497629531
chr5	85913627	85913627	0.00145110824143199	0.991	0.0233434945771693	1	-0.0315180394331513
chr2	133189699	133189699	0.00146156667920808	0.991	0.0233923877737725	1	-0.0899554685075274
chr2	145143754	145143754	0.00146235106204128	0.991	0.0233939565394389	1	-0.0550787651968573
chr16	85531414	85531414	0.00146339690581889	0.991	0.0234007545239934	1	-0.0665428616329023
chr2	145037160	145037160	0.00147777725776101	0.991	0.023457753009873	1	-0.0495717468017404
chr10	50143337	50143517	0.001380252325499	0.992	0.00439019071745668	1	0.038107412992834
chr19	21264896	21265421	0.00142260899849215	0.992	0.0103347667493842	1	0.0175852921505707
chr4	121992988	121993098	0.00145659892126444	0.992	0.0104116362670384	1	-0.0267856830951586
chr6	168947817	168948186	0.00146078229637487	0.992	0.0104197415563149	1	-0.0376313947245764
chr2	133174117	133174168	0.00147071781226215	0.992	0.0104414428147003	1	0.0138004841096266
chr12	130707332	130707407	0.0014890200783703	0.992	0.010478308807861	1	0.0323994385935085
chr6	166667371	166667648	0.00154837171274959	0.992	0.0106103465847841	1	-0.0160669180125301
chr16	75148743	75149110	0.00169165231028198	0.992	0.0221559389676947	1	-0.0276264906519299
chr11	17798912	17799117	0.00169923467766964	0.992	0.0221831309059125	1	0.0496357214479525
chr15	58357874	58358384	0.00144378733498873	0.993	0.0023722351485608	1	-0.0247356124464326
chr19	6230240	6230665	0.00151124425864449	0.993	0.00659692108821091	1	0.0256266996776799
chr1	3664522	3664680	0.00151934954792095	0.993	0.00660894829165341	1	0.0415562460272316
chr11	111383515	111383624	0.00152222561830938	0.993	0.00661417751054145	1	0.010887560390933
chr2	232348334	232348794	0.00155804576769247	0.993	0.00666725408225509	1	-0.0337321082585644
chr1	78442533	78442554	0.00170550974033529	0.993	0.0222124145316855	1	0.0330370350287472
chr11	13993807	13993807	0.00155150924408242	0.993	0.0238245827148693	1	0.0742958583911033
chr12	124086727	124086727	0.00156928858830177	0.993	0.0239176628110764	1	0.0223805466085729
chr10	115611817	115611817	0.00157504072907861	0.993	0.0239500839681823	1	0.0612138401109031
chr2	133171381	133171381	0.00157896264324465	0.993	0.0239736154531785	1	-0.0886929551252802
chr1	86970291	86970291	0.00165504777806568	0.993	0.0243260648062326	1	0.0837530715937852
chr19	58220080	58220773	0.00133868003533906	0.994	0.00232961701462325	1	0.0187621049113305
chr2	9459368	9459596	0.00160144828446323	0.994	0.00672791302135639	1	-0.0244490079575516
chr17	79317944	79318470	0.00163203921495829	0.994	0.00676870092868313	1	0.0271283034144995
chr2	144694809	144695257	0.00163491528534671	0.994	0.00677889790551481	1	0.0113426590759403
chr15	25684804	25684849	0.00165452485617687	0.994	0.00680399815617742	1	-0.0334599068246971
chr5	7396978	7397021	0.0017666916013254	0.994	0.0224628941164228	1	0.020935819630051
chr8	4601508	4601579	0.00176852182793621	0.994	0.0224678618743664	1	0.0522478370986559
chr9	85678242	85678251	0.00177662711721268	0.994	0.0225021132580831	1	-0.0183512641610241
chr8	98290148	98290229	0.00178917724254398	0.994	0.0225512679156307	1	-0.0327166205194729
chr15	56033606	56033728	0.00180957119620735	0.994	0.0226252613628965	1	0.0324606961224848
chr22	49448123	49448320	0.00182002963398344	0.994	0.0226555908324472	1	0.0371506889885838
chr17	9929528	9929698	0.00182395154814947	0.994	0.0226728472547777	1	0.0605135348461338
chr11	128559075	128559244	0.00185480393958893	0.994	0.0227988714299796	1	0.0572776674827261
chr4	41936852	41936863	0.00186238630697659	0.994	0.0228289394385858	1	-0.0483849670206676
chr19	3801294	3801874	0.00159621906557519	0.995	0.00352841544470715	1	0.0189901548901353
chr8	77594256	77595027	0.00153137675136345	0.995	0.00456719977681694	1	-0.0272999004863031
chr5	142784522	142785258	0.00153895911875112	0.995	0.00457635090987101	1	-0.0389908606309407
chr2	206551212	206551987	0.0015732105024678	0.995	0.00461583151247574	1	0.0238660809096779
chr17	10325588	10325617	0.00189899083919289	0.995	0.022966206434397	1	0.0579679113697362
chr6	168840193	168840641	0.00191729310530104	0.995	0.0230252966078319	1	-0.0348436581511073
chr10	117817567	117817578	0.00192121501946707	0.995	0.023040984264496	1	-0.037152982606522
chr17	40937362	40937365	0.00192801300402153	0.995	0.0230684376636582	1	-0.0207640763523068
chr18	44495671	44495876	0.00194579234824088	0.995	0.0231494905564229	1	0.0523188570240744
chr2	233283819	233284112	0.00195128302807332	0.995	0.0231732835023635	1	0.017901434111879
chr8	143856122	143856487	0.00195572786412816	0.995	0.0231952462216933	1	-0.0230033667558541
chr2	9324111	9324127	0.00198213541951278	0.995	0.0232948628415105	1	-0.030388199800067
chr5	38556108	38556223	0.00198396564612359	0.995	0.0233008764432317	1	-0.0251139854164814
chr2	160761413	160761427	0.00198841048217843	0.995	0.0233131651076186	1	0.0345045303535926
chr1	3615390	3615457	0.00199180947445566	0.995	0.0233264996157831	1	0.0564674645764565
chr15	34491893	34491893	0.0016696895909522	0.995	0.0243916915032775	1	-0.050673882034887
chr17	15847977	15848264	0.00143019136587982	0.996	0.00258584874013737	1	-0.0181422878446745
chr2	39470725	39471182	0.00163543820723551	0.996	0.00469296249107438	1	-0.030105533148599
chr6	3023598	3024023	0.001718321326611	0.996	0.00479728540789084	1	0.0037844210999507
chr1	6269260	6269367	0.00200828151395299	0.996	0.0233845439454404	1	0.0260728794728055
chr2	191555076	191555076	0.00172015155322181	0.996	0.0246262219704063	1	0.0810028540605515
chr19	9609342	9609422	0.00192618277741072	0.997	0.00502893980463115	1	0.0189144207453517
chr2	220435506	220436224	0.00192749008213273	0.997	0.00503077003124197	1	0.0165462524042594
chr1	181454744	181455181	0.0019604341611274	0.997	0.00506423703212544	1	0.0327344125900461
chr1	159824086	159824866	0.00173505482705274	0.997	0.00691172006527111	1	0.0221451790736401
chr12	9360854	9360986	0.00167125835661861	0.997	0.0108833118107399	1	0.0331974398563403
chr1	209858339	209858806	0.00171204626394535	0.997	0.0109630573987826	1	0.0362321950130582
chr2	11750735	11750918	0.00172433492833225	0.997	0.010983451352446	1	0.0426646001592795
chr3	64210991	64211204	0.00174786641332844	0.997	0.0110263309473279	1	-0.0367844658828356
chr8	94241979	94242042	0.00202292332683951	0.997	0.0234284693841	1	-0.0316689113924041
chr1	152680843	152681163	0.00202893692856076	0.997	0.0234452028845417	1	0.0464874651567984
chr8	49469560	49469775	0.00204906942127973	0.997	0.0235035086751434	1	0.0509013021022291
chr1	7510190	7510190	0.00183127245459273	0.997	0.0251211675381596	1	0.10056309854445
chr8	35598326	35598326	0.00194265481690805	0.997	0.0256161131059129	1	-0.0695245517303936
chr1	152777382	152777382	0.00195468202035055	0.997	0.0256636989977941	1	0.0901498648675969
chr10	80275252	80275252	0.00198056665384637	0.997	0.0257591322425008	1	0.0775492846417126
chr8	2820857	2820857	0.00201168050623022	0.997	0.0258864637224247	1	0.0861802124243525
chr10	593275	593275	0.00202841400667196	0.997	0.0259476455834148	1	-0.0192125948691619
chr22	42469976	42470868	0.00154575710330557	0.998	0.00316027843498891	1	-0.0279451807934389
chr10	102899949	102900491	0.00183074953270393	0.998	0.00377863356850002	1	0.0232110272677406
chr20	33865349	33866020	0.00183493290781436	0.998	0.00378098671699964	1	0.0131735258618048
chr14	37666920	37667261	0.00213404422821043	0.998	0.00523967732581929	1	-0.0326359666607923
chr12	85671811	85672623	0.00214397974409772	0.998	0.00524752115415136	1	-0.0334245011396661
chr6	168918116	168918901	0.00235628603095227	0.998	0.00546427227706075	1	-0.0206558576847086
chr11	63655748	63656090	0.0023840008910589	0.998	0.00549695489511102	1	0.0332595946565981
chr1	59247487	59248148	0.00239106033655776	0.998	0.00550401434060988	1	0.0120812709959987
chr5	28809622	28810645	0.00240178023527825	0.998	0.00551342693460836	1	-0.0340848259804667
chr1	3435887	3436219	0.00247420491687764	0.998	0.0055793150925977	1	0.0336689190147941
chr7	75932562	75932911	0.00253669408258976	0.998	0.00564101987547661	1	-0.0201535289909676
chr7	27213971	27214126	0.00273828047072383	0.998	0.00583920727133345	1	-0.0203062952992711
chr8	110703888	110704130	0.00277880691710616	0.998	0.00587764203016057	1	0.00929653241468514
chr6	28557047	28557240	0.0017544029369385	0.998	0.00693682031593372	1	0.020692423917075
chr5	31796424	31796726	0.0017787188047679	0.998	0.00697786968420486	1	-0.0300547881655696
chr5	1867978	1868279	0.00181061703998496	0.998	0.00701839613058719	1	0.0323638695499903
chr16	34808479	34809256	0.00176773744510301	0.998	0.0110692105422099	1	-0.0335215964824621
chr12	130591337	130591397	0.00179388353954322	0.998	0.0111272548718671	1	0.0298233034040838
chr21	22370237	22370444	0.00179702107087605	0.998	0.011133007012644	1	-0.0313530094680222
chr4	188426278	188426506	0.00179780545370925	0.998	0.01113692892681	1	-0.0399828778809685
chr6	169001953	169002120	0.00181950671209463	0.998	0.0111829460530248	1	-0.0270708067890935
chr5	42924215	42924552	0.00182891930609311	0.998	0.0112030785457438	1	-0.0372055953780505
chr14	59113178	59113603	0.00217143314325994	0.998	0.0239189701157984	1	0.0385574174139388
chr5	60628875	60628891	0.00217430921364837	0.998	0.0239304743973521	1	0.0228096372285465
chr1	29586570	29586580	0.00219679485486695	0.998	0.0240183252746713	1	0.0225900277162769
chr12	51794933	51795291	0.00221195958964228	0.998	0.0240734935339401	1	0.047543627873859
chr22	50018392	50018876	0.00221640442569711	0.998	0.024085782198327	1	-0.0360664189931119
chr19	19625761	19626251	0.00223784422313809	0.998	0.024161867333148	1	-0.0224425849407784
chr7	127991421	127991614	0.00226477470041151	0.998	0.0242497182104672	1	-0.0313623242497259
chr1	2572242	2572713	0.00228490719313048	0.998	0.0243312940251206	1	0.0484250708605909
chr8	132054555	132054713	0.00229771877940619	0.998	0.0243825403702235	1	0.0268042768130033
chr16	22824877	22825046	0.00231445227984792	0.998	0.0244377086294923	1	-0.0295484782436118
chr14	98419775	98419775	0.00206397269511065	0.998	0.0261209941895534	1	0.0946348906962982
chr1	153065613	153065613	0.0020935177818281	0.998	0.0262428349896448	1	0.0850222153902148
chr2	144503739	144503739	0.00210110014921576	0.998	0.0262666279355854	1	-0.0788157253638997
chr14	94811949	94811949	0.00212253994665674	0.998	0.0263495110549609	1	0.0845866650183209
chr16	32322028	32322028	0.00212646186082277	0.998	0.0263633684850142	1	-0.0758701207153695
chr12	52798363	52798363	0.00212646186082277	0.998	0.0263633684850142	1	0.0360404059113767
chr5	145484705	145484705	0.00215051626770777	0.998	0.0264551412764994	1	-0.0716183779840521
chr8	2960317	2960317	0.00224464220769255	0.998	0.0268319064973829	1	0.0891119446334284
chr17	41363737	41364121	0.00169269815405959	0.999	0.00271004268872839	1	0.0117659536814105
chr1	20511782	20512944	0.00170917019355692	0.999	0.00273278979089138	1	0.0267587340051429
chr5	7826845	7827964	0.00171596817811138	0.999	0.00274560137716709	1	-0.0248767763252318
chr8	1885083	1885997	0.0018393777438692	0.999	0.00293568348374746	1	-0.0159626740002203
chr7	94138743	94139752	0.0018882709404724	0.999	0.00302091975162256	1	-0.0157459249480526
chr1	53925145	53926227	0.0018882709404724	0.999	0.00302118121256696	1	-0.0167569905281455
chr10	45496087	45496482	0.00212123264193473	0.999	0.00350749856915498	1	-0.0150558424117912
chr15	75019196	75019376	0.0020090658967862	0.999	0.00395119779180545	1	-0.022591401336191
chr1	155290535	155290961	0.00206214246849984	0.999	0.00400715043390751	1	0.0222133897427214
chr3	147110295	147110499	0.00280076963643594	0.999	0.00589882036665714	1	-0.0411009669403311
chr16	49407186	49407997	0.00287188701331333	0.999	0.00596183245425806	1	0.041768614982311
chr12	2224410	2224755	0.00192592131646631	0.999	0.00716899763456284	1	0.0382252086592173
chr12	115129011	115130124	0.0019489298795737	0.999	0.0072014187916687	1	-0.0232877646711306
chr1	12655992	12656315	0.00200462106073136	0.999	0.00727070594193528	1	0.035385037516157
chr14	96507957	96508538	0.0018997752220261	0.999	0.0113379923930553	1	0.0439272491838006
chr11	120894841	120895273	0.00192173794135588	0.999	0.0113730281596052	1	-0.0200007013064339
chr1	18406624	18406812	0.00200383667789816	0.999	0.0115309505700241	1	0.0537091822635323
chr10	44875989	44876292	0.00201717118606267	0.999	0.0115536976721871	1	0.0412801047523099
chr10	134672797	134672917	0.00203573491311522	0.999	0.0115842886026821	1	0.037535104955534
chr11	103907989	103908336	0.00207390821099794	0.999	0.0116572362061703	1	-0.0285584995049816
chr7	100488705	100489022	0.00207678428138636	0.999	0.0116616810422252	1	-0.0287368535819792
chr4	8645833	8646016	0.00209142609427288	0.999	0.011694102199331	1	0.0454412054766239
chr19	4326975	4327350	0.00212489309515636	0.999	0.0117544996774879	1	0.0234011755417878
chr4	47033423	47033634	0.00216541954153869	0.999	0.011830584812309	1	-0.0246607228081203
chr19	34302382	34302998	0.00219261147975652	0.999	0.0118768633994681	1	0.0392035334897967
chr7	155963049	155963097	0.00223000039480603	0.999	0.0119464120106791	1	0.0555596847793706
chr14	99712336	99712380	0.00227810920857602	0.999	0.0120201439970005	1	-0.0220515294584714
chr1	1168432	1168550	0.00232517217856841	0.999	0.012097797897488	1	0.0256748629908697
chr8	2885516	2885627	0.00235105681206423	0.999	0.0121461681722024	1	0.0416035982810699
chr17	46688593	46688845	0.00236439132022874	0.999	0.0121691767353098	1	-0.0332561381892546
chr5	26237674	26237728	0.0023484422026202	0.999	0.0245509212184185	1	0.0473041381248582
chr1	5812881	5812892	0.00237301953139401	0.999	0.0246319741111831	1	0.0388710644186866
chr2	172974735	172974819	0.00238844572711374	0.999	0.0246719776356767	1	-0.0295103377660131
chr6	1101607	1101644	0.00242112834516401	0.999	0.0247674108803834	1	0.0541593060190311
chr4	967324	967327	0.0024321097048289	0.999	0.0247925111310461	1	0.0265472250729469
chr1	38942644	38942976	0.00246034748682433	0.999	0.0248842839225312	1	0.0381788422214051
chr1	152779374	152779584	0.00247655806537726	0.999	0.0249269020564688	1	0.0366669265647028
chr5	27523909	27523974	0.00248832380787536	0.999	0.0249629836667963	1	0.0501934531325995
chr8	67898717	67898781	0.00249433740959661	0.999	0.0249778869406272	1	-0.0460971169031639
chr12	52996658	52996663	0.00250348854265069	0.999	0.025009000793011	1	0.0559501929049827
chr17	79197669	79197747	0.00252806587142449	0.999	0.025078549404222	1	-0.0259303769731505
chr15	69853608	69853722	0.0025293731761465	0.999	0.0250824713183881	1	0.0540332654330322
chr16	88168312	88168314	0.00254270768431101	0.999	0.0251271811398808	1	0.0441128026541699
chr2	121334411	121334614	0.00255839534097514	0.999	0.0251758128755396	1	0.0202647122147161
chr6	168812624	168812737	0.00255891826286394	0.999	0.0251789504068724	1	-0.0289177249869045
chr1	3477168	3477292	0.00257120692725085	0.999	0.0252147705562555	1	0.0458353520787468
chr1	152778580	152778580	0.00228490719313048	0.999	0.0269995029627447	1	0.0849697426576481
chr12	2255779	2255779	0.00230660845151586	0.999	0.0270850006915642	1	0.0958611715645326
chr2	145260010	145260010	0.00237380391422721	0.999	0.0273375719638567	1	-0.0783483125573694
chr7	109596752	109596752	0.0024083167588883	0.999	0.027470394123613	1	-0.0578049037874332
chr12	52908478	52908478	0.00242818779066286	0.999	0.02754386464899	1	0.0957046093919357
chr11	111148753	111148753	0.00246479232287917	0.999	0.0276978651452429	1	0.0606923741575776
chr12	76423956	76423956	0.00247577368254406	0.999	0.0277436208105132	1	0.0574492606739115
chr1	6988185	6988185	0.00249015403448618	0.999	0.0278076787418918	1	0.08359665069603
chr22	37172025	37172713	0.00165008002012203	1	0.00305177214306202	1	0.00978056930861151
chr8	9911482	9911685	0.00190683466752496	1	0.00335480537762412	1	-0.0374479839829854
chr18	74728979	74729175	0.00239811978205661	1	0.00395590408880469	1	0.0343434256445041
chr1	2564329	2565265	0.00208855002388446	1	0.00403434237212533	1	0.0378149040248213
chr11	2919689	2920055	0.00209534800843891	1	0.0040421862004574	1	-0.0265034146149539
chr1	152487844	152488269	0.00246976008082281	1	0.0040427091223462	1	-0.0143138106878677
chr5	148960831	148961311	0.00229484270901776	1	0.00405133733351148	1	-0.0234799405149366
chr11	124805538	124806901	0.00229693439657298	1	0.00406807083395321	1	0.0126701210649803
chr3	128564782	128565090	0.00214110367370929	1	0.00409212524083821	1	0.0165556392014344
chr6	75911716	75912711	0.00231915857684716	1	0.00415644463316114	1	-0.0228367327473858
chr3	137486091	137487081	0.0023113147485151	1	0.00425527687014516	1	0.022528127232283
chr6	33280390	33280476	0.0026990613290635	1	0.00437790205306977	1	0.017722452862411
chr5	41870796	41871058	0.0026993227900079	1	0.00437868643590298	1	-0.0171905087835382
chr6	6546375	6547074	0.0024572099554915	1	0.00439751162389994	1	0.0190661609792377
chr14	38064532	38065303	0.00249747494092944	1	0.00443490053894944	1	-0.0262420021422267
chr10	125805493	125806390	0.00282194797293252	1	0.00457242899570498	1	0.023673417971345
chr11	46354562	46354803	0.00286038273175963	1	0.00462576702836302	1	0.00717220970857044
chr16	2907819	2908245	0.00279161850338187	1	0.00470577407735008	1	0.0158663423553458
chr8	70745597	70746368	0.00240230315716705	1	0.00474237860956639	1	-0.0110084638444456
chr1	2125114	2125243	0.00285489205192719	1	0.00477244661817263	1	0.0348243466571204
chr7	117119382	117119637	0.00290770716269643	1	0.00482447734610866	1	-0.0270182842978555
chr17	10741383	10742003	0.0030138603061237	1	0.00493089195048034	1	0.0298031889924141
chr18	32847251	32848016	0.00307190463578098	1	0.00499024358485963	1	-0.0318533054466977
chr6	33172371	33172467	0.00311975198860658	1	0.0050349534063524	1	0.0110706971898882
chr4	80247171	80247524	0.00315138876287924	1	0.00506632871968066	1	0.012044999787881
chr6	28227068	28227127	0.00324054694492038	1	0.0051554869017218	1	-0.0345361352865815
chr12	54369102	54370458	0.00314040740321435	1	0.00520960931721305	1	-0.0157852969042119
chr11	2922762	2922852	0.00337729101884271	1	0.00528281838164565	1	-0.0151850669673936
chr6	32145165	32145383	0.00317309002126462	1	0.00528307984259005	1	-0.013960142286525
chr19	55549590	55549826	0.00343821141888841	1	0.00534321585980255	1	-0.0302051198587879
chr11	10472001	10472159	0.00349468698287928	1	0.00540518210362586	1	-0.0237501932647272
chr7	127881001	127881440	0.00351246632709862	1	0.00542819066673325	1	0.0219922384398369
chr15	99408804	99409506	0.00354671771081531	1	0.00546087328478352	1	-0.0425970543903355
chr15	78556860	78557532	0.00355979075803541	1	0.00547734532428086	1	-0.0335622217664246
chr14	97091489	97092205	0.00364371972118851	1	0.00556467327971118	1	0.0336370482295543
chr1	207224510	207225128	0.00372085069978714	1	0.0056402354926434	1	0.0195499718444155
chr5	404264	404996	0.00328996306341238	1	0.00565958360252916	1	-0.0137284037568715
chr8	22132926	22133076	0.00377052827922356	1	0.00568102339997014	1	-0.0224632911691817
chr13	88324169	88324711	0.00384347588271176	1	0.00576704405067845	1	-0.0478944800929506
chr8	23082876	23083578	0.00395067486991664	1	0.00589123799926948	1	0.0310657278824945
chr15	67356310	67356942	0.00291189053780686	1	0.00599294630664192	1	-0.0249452116165108
chr1	247681439	247681931	0.00295999935157686	1	0.00603425713585746	1	-0.0413335382040373
chr7	95026121	95026502	0.00412376201511087	1	0.00607060020712936	1	-0.016869536233896
chr13	20692403	20692932	0.00299555804001555	1	0.00607347627751778	1	-0.0334976494829976
chr17	76506489	76506793	0.00422756201003853	1	0.00618616594455512	1	0.03499891671519
chr5	160975024	160975978	0.0031469439268244	1	0.00621858710166098	1	-0.0198957477278956
chr2	190539103	190539778	0.00429057409763945	1	0.00625937500898772	1	-0.0206287541785385
chr7	150065170	150065255	0.00436143001357244	1	0.00634618004252924	1	-0.0226488317678185
chr12	54410487	54410526	0.0033399021037932	1	0.0063901054811888	1	-0.0199623607537033
chr18	72916311	72917163	0.00336369504973379	1	0.00640971505201896	1	0.0338017092769938
chr7	95025736	95025905	0.00442731817156178	1	0.00642252663829467	1	-0.00985450555535777
chr14	48144280	48145108	0.00345154592705292	1	0.00647769489756352	1	-0.029246782683516
chr7	100075304	100075506	0.00346984819316107	1	0.00649312109328325	1	0.028093038730402
chr19	38281047	38281559	0.00352710813998514	1	0.00654122990705325	1	-0.0385987617334438
chr5	87971573	87972056	0.00357207942242232	1	0.00658201781437999	1	0.0168667554944223
chr6	168813688	168814821	0.0036547010808534	1	0.00665836441014542	1	0.0302529541313873
chr2	198651076	198651576	0.00367849402679399	1	0.00667771252003118	1	-0.0156746416696115
chr6	168841257	168841574	0.00374882702083818	1	0.0067286974041896	1	-0.0350459532055687
chr5	118603742	118603938	0.00377314288866758	1	0.00675092158446378	1	0.00722010282541671
chr2	109745516	109745841	0.00469845317090682	1	0.00678098959307003	1	-0.0173660100099336
chr22	31318147	31318373	0.00476434132889617	1	0.00687799160344323	1	-0.0153832266711482
chr6	30227294	30227373	0.00478551966539274	1	0.00690962837771589	1	0.00297600656771863
chr1	247712140	247712383	0.0040063660510743	1	0.00696584248076236	1	-0.0200962120591623
chr12	53242896	53243489	0.00486265064399138	1	0.00701839613058719	1	0.031541632480713
chr5	140857813	140858046	0.0041146108820568	1	0.00706127572546915	1	0.0284031554449067
chr4	174450353	174451251	0.00427619374569733	1	0.00719828126033588	1	-0.0372584157555822
chr11	63753169	63753376	0.00496671209986344	1	0.00720900115905637	1	-0.0246171052420661
chr7	96650668	96651586	0.00429188140236146	1	0.007212661612278	1	0.0268450392744015
chr5	2005957	2006374	0.00438574588140184	1	0.00729580619259788	1	0.0342384953334701
chr8	145103842	145104359	0.00203704221783723	1	0.00731463138059484	1	-0.0224792839829605
chr21	47581042	47582049	0.00206344977322185	1	0.0073588182801988	1	0.0279194827659974
chr21	39643733	39644354	0.00446392270377808	1	0.00736796941325288	1	0.0391382068908136
chr12	52257893	52258264	0.00207495405477554	1	0.00737450593686293	1	0.0325666540164182
chr20	21686264	21686293	0.0021178336496575	1	0.00743673364163065	1	-0.00932411100526699
chr10	135050619	135050702	0.00456353932359531	1	0.00745765051718282	1	0.0272890901623041
chr9	970654	971757	0.00457896551931504	1	0.00747046210345853	1	-0.0321627622189187
chr8	72756058	72756812	0.00461661589530895	1	0.00750915832323005	1	-0.0276338458129444
chr6	32116893	32116963	0.00513901486222446	1	0.00751961676100613	1	0.0184582050984533
chr17	46621709	46622037	0.00219208855786771	1	0.00753164396444863	1	-0.0284910932923817
chr4	188916726	188916943	0.00515496397983299	1	0.00755020769150119	1	0.0109332947241776
chr7	94293250	94293780	0.00221143666775347	1	0.00755779005888885	1	0.0345370581169419
chr5	23507450	23507617	0.00468747181124193	1	0.00757060164516455	1	-0.0246323577730415
chr11	30038310	30038677	0.00517509647255196	1	0.00758655076277309	1	0.0127228494750617
chr10	75407372	75407634	0.00224516512958135	1	0.00760563741171444	1	0.0278324285903336
chr2	11679879	11680144	0.00474316299239959	1	0.00762367821687819	1	0.0430574358093571
chr13	93879303	93879769	0.00474316299239959	1	0.0076239396778226	1	-0.032600753231456
chr2	237072673	237072998	0.00227863213046483	1	0.00764407217054156	1	0.0451717350104415
chr7	50518350	50518647	0.00228987495107412	1	0.00765819106153928	1	-0.0354530323233301
chr8	67454546	67454707	0.00229876462318379	1	0.00767178703064819	1	0.0304561698872155
chr7	155165723	155166435	0.00481977104910942	1	0.00768773614825672	1	0.0281707420525509
chr8	49647703	49647907	0.00525458059965022	1	0.00776146813457813	1	-0.0110583478383552
chr6	28367544	28367883	0.00491964912987105	1	0.00777741725218666	1	-0.0200893383448506
chr1	200009373	200010137	0.00492252520025947	1	0.00778029332257509	1	0.026135007536174
chr1	85512957	85513315	0.00242661902499645	1	0.00781637493290259	1	0.0337423812574724
chr20	53092334	53092818	0.00252126788687003	1	0.00792069784971905	1	-0.0207905327984148
chr17	9929755	9930194	0.00256493186458519	1	0.00797377442143269	1	0.0481607325469202
chr16	31580299	31580989	0.00515810151116582	1	0.00798397139826437	1	-0.0237851747340357
chr12	55378411	55378912	0.00518921536354968	1	0.00801351648498181	1	0.0341980168944381
chr7	4784769	4784963	0.00260598123285633	1	0.00802894268070154	1	0.0200864511672419
chr12	107974296	107974554	0.0052286959661544	1	0.0080482907905873	1	0.0301864535907079
chr6	160769359	160770346	0.00263474193674057	1	0.00805718046269698	1	-0.0188003352428844
chr21	34774882	34775045	0.00266768601573524	1	0.00809169330735806	1	-0.00992534085900945
chr11	17599365	17599798	0.00267317669556769	1	0.0080969225262461	1	0.044272095183613
chr4	25656514	25657160	0.0026744840002897	1	0.00809979859663453	1	0.0381731981738069
chr2	219646372	219646831	0.0026747454612341	1	0.00810032151852333	1	0.0371623216650941
chr6	32362318	32362593	0.00530242795247581	1	0.0081207154721867	1	0.038167452589193
chr17	47209827	47210270	0.00539681535340499	1	0.00819784645078534	1	-0.0164042074854612
chr11	119191624	119192155	0.00277462354199573	1	0.0082056902791174	1	-0.0180705038104558
chr6	30181581	30181604	0.00280965930854562	1	0.00824464795983332	1	-0.0175615483177933
chr1	33592870	33593154	0.00549643197322222	1	0.00828334417960484	1	0.0111882991298529
chr5	45695241	45696206	0.00546871711311559	1	0.00832936130581962	1	-0.0272569034434466
chr3	46759472	46759698	0.00574481987040427	1	0.00851133812312353	1	0.0266151887384067
chr1	240656217	240656737	0.00552414683332884	1	0.00851839756862239	1	-0.0210773929212101
chr3	44283283	44283355	0.00575684707384677	1	0.00852153509995521	1	-0.0108534329816585
chr12	111855897	111856416	0.00313517818432631	1	0.0085801023515013	1	-0.025998420443612
chr18	31803067	31803458	0.0031945298187056	1	0.0086407612906026	1	-0.0422525357155802
chr19	49713645	49714044	0.00323270311658831	1	0.00868416380737336	1	0.0242988811518565
chr2	127818000	127818226	0.00594640625853833	1	0.00870874113614716	1	-0.0110756381922332
chr12	76742363	76742630	0.00332578321279548	1	0.00877802828641373	1	-0.0266377870570861
chr12	114917826	114918693	0.00604445411268914	1	0.00879789931818829	1	-0.016901744399243
chr1	2038593	2038940	0.00339559328495086	1	0.00883816430362623	1	0.0278948609433671
chr12	133120548	133121660	0.00611504856767773	1	0.00886352601523324	1	0.0347683441229226
chr16	20420222	20420716	0.00344213333305444	1	0.00888810334400704	1	0.0367911151467577
chr3	50375459	50375545	0.005615919624814	1	0.00890614414917079	1	-0.0190431412252611
chr2	175199576	175199694	0.00348841192021362	1	0.00893804238438785	1	0.0212769479508547
chr22	51016501	51016703	0.00562297907031286	1	0.00894640913460872	1	-0.0143848982813779
chr15	93614758	93615439	0.00623636644588033	1	0.00896654162732769	1	0.0165884294799982
chr6	41303030	41303596	0.00355639176575819	1	0.00900131593293318	1	0.0306682816995937
chr17	1012288	1012835	0.00627584704848506	1	0.00900576076898801	1	-0.013545645694119
chr10	134211353	134211908	0.00629022740042717	1	0.00901831089431932	1	-0.0195784342555039
chr17	21226435	21226936	0.00357730864131036	1	0.00902589326170698	1	-0.0265583506265142
chr6	10417087	10418121	0.00630147022103647	1	0.00903138394153943	1	-0.0144148973813613
chr16	67918680	67918813	0.00632317147942185	1	0.00905073205142518	1	0.0266180467307562
chr7	20833088	20833585	0.00635062487858407	1	0.00907844691153181	1	-0.0154021988546837
chr3	53529387	53530075	0.00643533822457037	1	0.00916080710901849	1	0.0246231248922665
chr5	66124492	66124801	0.0056642898995284	1	0.00920316378201164	1	-0.0171308360089971
chr11	2920350	2920617	0.00651403796883542	1	0.0092457819159492	1	-0.0209599429635197
chr16	1014818	1015103	0.00384216857798975	1	0.00927951037777707	1	0.0355696425852755
chr13	36871943	36872086	0.00661182436204183	1	0.00933703178554555	1	-0.00995149250733497
chr17	46608345	46608570	0.00680478253901063	1	0.00951822422001625	1	-0.0176472168603363
chr21	19617138	19617873	0.00411016604600196	1	0.00952110029040467	1	-0.0270683085538349
chr2	73511261	73512148	0.00416193531299359	1	0.00956816326039706	1	0.0162219235467116
chr1	21616619	21616984	0.00417056352415886	1	0.00957522270589592	1	-0.0130235073615895
chr14	37125004	37125531	0.00688322082233127	1	0.00960110733939173	1	-0.0224450976214524
chr2	133175192	133175397	0.00423462145553739	1	0.00963797333255244	1	-0.0157113466346797
chr6	10416090	10416531	0.00692034827643638	1	0.00964660154371771	1	-0.0108866037543148
chr12	96183197	96183791	0.00425710709675598	1	0.00965941312999341	1	0.0168436907880489
chr7	123673549	123673690	0.00428220734741858	1	0.00967719247421276	1	0.0218987032280818
chr7	155971123	155971398	0.00435097157579635	1	0.00973628264764765	1	0.0430888964017037
chr12	54410657	54410671	0.00441006174923124	1	0.00978439146141765	1	-0.0231538902988075
chr4	52942997	52943247	0.00448405519649705	1	0.0098518483850734	1	0.0222967949166535
chr6	170599833	170600003	0.00711487521907159	1	0.00985629322112824	1	0.00662997642080475
chr1	152486477	152487335	0.00465060581808123	1	0.0099964362873278	1	0.0371832833201801
chr6	40346035	40346509	0.00732430543553772	1	0.0100787964848145	1	0.0276790632199931
chr17	406249	406501	0.00479519372033562	1	0.0101151395560864	1	-0.0378805117834777
chr6	28092269	28092420	0.00574246672190465	1	0.0101172312436416	1	-0.0222654213637197
chr6	164092631	164093099	0.00482317004138665	1	0.0101352720488053	1	-0.0296706554981154
chr6	710835	711405	0.00485899019076975	1	0.0101661244402448	1	0.0199482706946843
chr4	1255808	1256272	0.00491049799681697	1	0.0102071738085159	1	0.0307863874703163
chr2	237077920	237078362	0.00745738905623842	1	0.010220246855736	1	0.0305869691882996
chr7	23749667	23749852	0.00499991763980251	1	0.010281951638615	1	-0.0279642133238655
chr19	58427935	58428186	0.00502083451535469	1	0.0102950246858351	1	-0.038346128075064
chr7	154684327	154684562	0.00504881083640572	1	0.0103198634755533	1	0.0265459678822869
chr2	105853494	105854051	0.00754314824600233	1	0.0103269229210521	1	-0.0172668947282643
chr17	9674817	9675212	0.00755857444172205	1	0.0103473168747155	1	0.0284654152159387
chr16	68573191	68573721	0.0075755694031082	1	0.0103716327425449	1	-0.0186450166991046
chr3	55516184	55517101	0.00759282582543874	1	0.0103972559150963	1	0.0143056524011249
chr19	40324898	40325100	0.00759674773960477	1	0.0104030080558732	1	-0.0243494642118016
chr7	2208345	2208830	0.00760433010699243	1	0.0104137279545936	1	-0.0147632420457475
chr1	35220334	35220814	0.00760877494304727	1	0.0104200030172593	1	-0.0193209037276433
chr10	93393028	93393086	0.00526033274042706	1	0.0105018402928572	1	0.0116079885456404
chr14	37051417	37051777	0.00528543299108967	1	0.0105204040199097	1	-0.0257443561342033
chr12	132903921	132904689	0.00769610289847759	1	0.010523803012187	1	0.0172579126932133
chr6	28829171	28829328	0.00531523953875152	1	0.0105379219031847	1	-0.019339218943494
chr7	70597058	70597458	0.00536753172763195	1	0.0105818473418442	1	0.0099053945890735
chr7	138348774	138349443	0.00539498512679418	1	0.0106032871392852	1	0.0243829807094045
chr15	100882334	100882647	0.00540230603323744	1	0.0106090392800621	1	0.00885819137312011
chr2	240039617	240040219	0.00542269998690081	1	0.0106249883976706	1	0.0354843279434782
chr7	19157634	19157739	0.00551133524705314	1	0.0107015964543804	1	0.0142804660467363
chr12	115132460	115132905	0.00552022491916281	1	0.0107094402827125	1	-0.0185474153981772
chr16	3507460	3507582	0.00785559407456291	1	0.0107238206346546	1	-0.0147895824519214
chr13	114111919	114112218	0.00786500666856139	1	0.0107358478380971	1	0.0129210990593639
chr3	54157557	54157900	0.00787128173122704	1	0.0107463062758732	1	0.0292534526439049
chr19	53811704	53812098	0.00557356295182085	1	0.0107557188698717	1	-0.0239520753707193
chr19	38976253	38976794	0.00563735942225498	1	0.0108129788166957	1	-0.0182199180119494
chr6	27730016	27730563	0.00568912868924661	1	0.0108524594193005	1	-0.0283043589484182
chr13	36728963	36729231	0.00573122390129536	1	0.0108916785609608	1	-0.011490758185378
chr5	147763284	147763476	0.00575031055023671	1	0.010911288131791	1	0.0140521946828092
chr19	1439980	1440293	0.0058091392627272	1	0.0109562594142281	1	0.0242882352423751
chr12	10183167	10183220	0.00586404606105165	1	0.0109965243996661	1	0.0212692151104592
chr17	6347791	6348019	0.00587162842843932	1	0.0110035838451649	1	0.0101453063079749
chr6	168955764	168956418	0.00588417855377062	1	0.0110132579001078	1	-0.0234488530540303
chr1	95006322	95006729	0.00600366620536241	1	0.0111034619259265	1	0.0202956951878785
chr2	192711243	192712158	0.00813012806618518	1	0.011110259910481	1	0.0229106886349004
chr11	433316	434467	0.00601909240108213	1	0.0111173193559799	1	-0.0141075988174305
chr6	1394986	1395278	0.00603033522169143	1	0.0111256861062007	1	0.0345510543796502
chr7	27285433	27286075	0.0060507291753548	1	0.0111398049971984	1	-0.0124897005541246
chr4	379766	380396	0.00609230146551474	1	0.011177193912248	1	-0.0316811417568225
chr19	7964574	7965034	0.00614354781061756	1	0.0112151057491863	1	-0.0141247550024871
chr6	28945322	28945500	0.00823889581905648	1	0.0112809939071756	1	0.0113502084149564
chr11	13690157	13690461	0.00824961571777696	1	0.0112974659466729	1	-0.0129428539356842
chr1	230272306	230272611	0.00631271304164576	1	0.0113489737527202	1	0.028956505426831
chr5	50694849	50695337	0.00830033914099098	1	0.0113793032222708	1	-0.0238454802331274
chr8	134203235	134203379	0.00643324653701516	1	0.0114407465442053	1	0.0418744134261426
chr17	80806135	80806435	0.00840230890930783	1	0.0115521289065207	1	-0.024335695849119
chr12	111536664	111537195	0.00661496189337466	1	0.0115683394850736	1	0.0347567355010799
chr14	103740033	103740597	0.00844361973852337	1	0.0116258608928421	1	-0.0261392180677178
chr20	21378200	21378227	0.00676399463168389	1	0.0116870427538322	1	-0.00997882819448831
chr11	16761290	16761533	0.00681471805489791	1	0.0117309681924917	1	0.0186248877457451
chr1	119527156	119528018	0.00851552149823396	1	0.0117586830525984	1	-0.0243630589802114
chr4	110223429	110223700	0.006898647018051	1	0.0117911042097042	1	-0.0297447698342458
chr12	67072769	67073062	0.00854741973345103	1	0.0118284931247537	1	0.0218070989059665
chr10	126106425	126106614	0.00704480368597181	1	0.0119074543299632	1	0.0280212551719454
chr8	11665843	11666017	0.00710860015640594	1	0.0119524256124004	1	0.00574272597962061
chr6	32821090	32821194	0.00861461519616238	1	0.0119798790115626	1	0.00967516902646244
chr1	35250489	35250839	0.00714102131351181	1	0.0119798790115626	1	0.0286092556582389
chr9	138966848	138967195	0.00714912660278827	1	0.0119845853085618	1	0.0555677691940838
chr15	93353059	93353422	0.00722364297194289	1	0.0120489047008848	1	-0.0135030461530772
chr16	30485597	30485966	0.0074069270939688	1	0.0121929696812503	1	-0.0160042914623441
chr13	102068530	102068996	0.00744928376696195	1	0.012223299150801	1	-0.0261359888299643
chr5	41869679	41870316	0.00754184094128032	1	0.012294155066734	1	-0.0289896181346435
chr3	49377951	49378124	0.007552037918112	1	0.012300691590344	1	-0.0286087041491402
chr19	1050977	1051160	0.00249224572204139	1	0.012363703677945	1	-0.021871956215493
chr6	168817299	168817498	0.00252492834009166	1	0.0124248855389351	1	-0.0336198521502725
chr19	52901307	52901639	0.00253773992636737	1	0.0124418805003212	1	-0.0255838064508938
chr8	50891767	50891864	0.00257408299763927	1	0.0124894663922024	1	0.0423561721803563
chr13	85937730	85937926	0.00779833412773884	1	0.0124946956110904	1	0.0298858535192054
chr15	83379988	83380063	0.00258244974786014	1	0.0125046311269777	1	-0.0223515909071919
chr9	98491016	98491311	0.0026017978577459	1	0.0125326074480288	1	0.0427751699917718
chr20	23336944	23337156	0.0026138250611884	1	0.0125550930892473	1	0.0318286465324208
chr14	69341603	69341905	0.00261826989724323	1	0.0125618910738018	1	-0.0275550200919157
chr10	96990543	96990858	0.0026381409290178	1	0.0125932663871301	1	-0.0547480360933513
chr8	67344553	67344588	0.00264886082773829	1	0.0126141832626822	1	0.00717014826821892
chr2	98351769	98352002	0.00798554016393078	1	0.0126547097090646	1	0.0316125141994658
chr6	168426308	168426664	0.00802946560259035	1	0.0126884381708924	1	0.0249585727215959
chr1	3401607	3401748	0.00270847392306198	1	0.0127004653743349	1	0.0329654999160318
chr12	15475767	15476085	0.00807914318202676	1	0.0127279187734972	1	-0.0399537663799977
chr3	109056349	109056897	0.0080848953228036	1	0.012733670914274	1	-0.0252392764461458
chr12	52545978	52546246	0.0027717474716073	1	0.0127945913143197	1	0.0269407983807407
chr18	24445134	24445318	0.0081816358722324	1	0.012805834134929	1	0.0378327606308668
chr1	152943210	152943352	0.00278063714371698	1	0.0128081872834286	1	0.0307796014645885
chr10	57390306	57390872	0.00818529632545403	1	0.0128094945881506	1	-0.0337335809547014
chr1	7887199	7887455	0.00822007063105952	1	0.0128319802293692	1	-0.0206845479422573
chr6	32935354	32935592	0.00828465148432686	1	0.012880611965028	1	-0.0113789193010971
chr10	134600651	134600680	0.00829850891438017	1	0.0128905474809153	1	0.0253515332076872
chr12	53189841	53190173	0.00284574091887311	1	0.012896822543581	1	0.0371984867644374
chr1	207991597	207991780	0.00830739858648984	1	0.0128983913092474	1	0.0125980618660946
chr14	65009265	65009707	0.00284809406737273	1	0.0128996986139694	1	0.0269619304535707
chr19	58238987	58239222	0.00831785702426593	1	0.0129067580594682	1	0.0123342723282395
chr21	44573854	44574022	0.00287894645881219	1	0.012947545966795	1	0.0355133862288254
chr2	176981328	176981469	0.0084352529883025	1	0.0130011454603974	1	0.0137973688309592
chr1	15175204	15175356	0.00292653235069338	1	0.0130157872732839	1	0.0493478966668114
chr3	128720323	128720433	0.00293463763996985	1	0.0130319978518369	1	0.00870062632971086
chr5	151150340	151150581	0.00293463763996985	1	0.0130319978518369	1	-0.0318214561628506
chr2	237542624	237542706	0.00294797214813436	1	0.0130484698913342	1	0.0363139352501908
chr18	24127237	24127875	0.00295816912496604	1	0.0130604970947767	1	0.0352597470952114
chr2	102927278	102927898	0.00853853006134135	1	0.0130819368922177	1	0.0259256591660358
chr19	29284229	29284511	0.00300732378251365	1	0.0131441645969854	1	-0.0307507822543512
chr2	198365065	198365150	0.00864703635326825	1	0.0131669116991484	1	-0.0107118248509345
chr7	158854447	158854856	0.0086656000803208	1	0.0131815535120349	1	0.0299302852262601
chr2	37551024	37551108	0.0030499419164512	1	0.0132053464579755	1	0.0315853462208444
chr1	218520468	218520792	0.00305229506495082	1	0.0132116215206412	1	-0.0194702292460232
chr12	117768754	117768981	0.00307059733105897	1	0.0132395978416922	1	0.0468216636970424
chr11	133994642	133995182	0.003074519245225	1	0.013245349982469	1	0.0246545100409187
chr11	2573972	2574042	0.00308340891733468	1	0.0132605147172444	1	-0.0233243247829894
chr1	209877970	209878389	0.00308994544094473	1	0.0132688814674652	1	0.0333014381958254
chr10	118084243	118084587	0.00878090435680215	1	0.0132814315927965	1	-0.0243576265458171
chr15	26873818	26874363	0.00887529175773133	1	0.013360392798006	1	-0.0278926118419057
chr1	1024212	1024608	0.00888104389850818	1	0.0133650990950052	1	-0.00626152162525784
chr8	86290219	86290878	0.00891634112600247	1	0.0133956900255003	1	0.0307441744330582
chr12	52867568	52867793	0.00317152125559821	1	0.0134027494709991	1	0.0470190573614323
chr7	149795	150023	0.00317753485731946	1	0.0134119006040532	1	-0.0418451004673097
chr9	74764263	74764766	0.00909570333386236	1	0.0134126849868864	1	-0.0106849806053786
chr1	117529619	117530009	0.00894510182988671	1	0.0134173912838857	1	-0.0141900902225066
chr4	7164648	7164855	0.00318537868565152	1	0.0134202673542741	1	0.0374692470286504
chr7	155580742	155580862	0.0032311343509219	1	0.0134840638247082	1	0.0347972065908768
chr1	3473186	3473665	0.00323950110114277	1	0.0134963524890951	1	0.045264351926263
chr2	223161771	223162128	0.00908289174758665	1	0.0135264204977014	1	0.0333824491625909
chr22	42679444	42679804	0.00326904618786021	1	0.0135355716307554	1	0.0394826377684724
chr12	52845930	52846073	0.00326904618786021	1	0.0135360945526442	1	0.0412438150771408
chr19	35417702	35418345	0.00911688167035893	1	0.0135525665921416	1	0.00818399252236195
chr14	103655424	103655712	0.00328185777413592	1	0.013554135357808	1	-0.02852225285114
chr16	34786998	34787392	0.0032920547509676	1	0.0135724376239161	1	-0.023725172413703
chr2	8301459	8301539	0.00335323661195771	1	0.0136600270402909	1	0.0392000282186887
chr12	53184005	53184086	0.00335480537762412	1	0.0136613343450129	1	0.0290504396014331
chr12	130527030	130527046	0.00336970865145504	1	0.0136812053767874	1	0.0171068888598715
chr6	28733419	28733695	0.00929807410482963	1	0.0137008149476176	1	0.0111859338816059
chr17	36666953	36667782	0.00932474312115865	1	0.0137201630575034	1	0.0110067335525718
chr16	89159988	89160056	0.00940422724825691	1	0.0137769000824386	1	-0.0153795741398599
chr3	124931736	124932002	0.00916080710901849	1	0.0137774230043274	1	-0.0262228968105769
chr20	23433608	23434279	0.00944109324141761	1	0.0138046149425453	1	0.0246982883825614
chr15	78632572	78632670	0.00948397283629956	1	0.0138362517168179	1	-0.0285793412614362
chr12	130529849	130530121	0.00361103710313824	1	0.0139818854628499	1	0.0399199235053118
chr6	28601440	28601519	0.00968372899782281	1	0.0139933897444036	1	-0.0158690851774321
chr8	87081654	87082008	0.00968555922443363	1	0.0139944355881812	1	0.0333076927458484
chr15	67228722	67228986	0.00969026552143287	1	0.0139980960414029	1	-0.0259329215626848
chr9	90589530	90589640	0.00363822904135606	1	0.0140216275263991	1	-0.0112884907607533
chr15	102077114	102077239	0.00365025624479856	1	0.014035223495508	1	0.0457052611611662
chr7	73894884	73895109	0.00978073100819602	1	0.0140744426371683	1	0.0327599615027693
chr14	38091400	38091824	0.00979171236786091	1	0.0140838552311668	1	-0.0271286245135011
chr6	50818181	50818424	0.00369967236329057	1	0.0140958824346093	1	-0.0298769036177393
chr6	168920227	168920331	0.003727910145286	1	0.0141283035917151	1	-0.0220781726619728
chr4	4765299	4765389	0.00373444666889606	1	0.0141364088809916	1	0.0373350852569976
chr19	29218653	29218774	0.00374412072383894	1	0.0141505277719893	1	-0.0182030973734252
chr2	136874298	136875144	0.00990178742545422	1	0.0141745821788743	1	-0.0158814878738353
chr12	113416145	113416442	0.0100029728109379	1	0.0142632174390267	1	0.0263300623626536
chr1	228651848	228652067	0.00385210409387703	1	0.0142883176896893	1	0.0208388812820794
chr1	178006917	178007364	0.00385210409387703	1	0.0142885791506337	1	-0.0350789473880069
chr1	28908770	28909005	0.00389236907931496	1	0.0143361650425149	1	-0.0340753876520289
chr16	89410196	89410474	0.00389812122009181	1	0.0143458390974577	1	0.0309781813328841
chr20	61560373	61560630	0.0101109561809759	1	0.0143515912382346	1	0.0193823578054845
chr3	12595473	12595852	0.0039579957763599	1	0.0144229700760564	1	-0.01587514904951
chr1	20396560	20396690	0.00397106882358001	1	0.0144397035764981	1	0.0339697415513933
chr7	27184853	27185512	0.0102382876608998	1	0.0144522537018294	1	0.0385096134247087
chr1	156358231	156358408	0.00398754086307735	1	0.0144585287644951	1	0.012767321443919
chr20	4702516	4702581	0.00398754086307735	1	0.0144595746082727	1	0.0436468550941977
chr12	130750236	130750328	0.00400479728540789	1	0.0144802300228804	1	0.0371434401774773
chr22	50052294	50052407	0.00412062448377805	1	0.0146104375731927	1	-0.0291415511206449
chr11	2907930	2908116	0.0105170050276325	1	0.0146629912230176	1	-0.0133101832689655
chr6	33158020	33158538	0.0105421052782951	1	0.0146844310204585	1	0.0297619729508567
chr1	3466683	3467219	0.00418102196193495	1	0.0146865227080138	1	0.0394123198931712
chr10	101281703	101282185	0.0105489032628496	1	0.014691229005013	1	-0.0164541275843087
chr19	30863260	30863349	0.00420612221259755	1	0.0147163292556756	1	0.0356973182772019
chr11	119613308	119613957	0.0106043329830628	1	0.0147320169123397	1	0.019218121584904
chr8	144809598	144810339	0.0106218508663378	1	0.0147479660299483	1	-0.023833709289539
chr5	1218561	1218916	0.0106307405384474	1	0.0147545025535583	1	-0.0099904245312763
chr5	3536156	3536525	0.0106976745402144	1	0.014807579125272	1	-0.0213619283073128
chr11	19734932	19735068	0.00431645873113527	1	0.0148389544386002	1	-0.0172349624557598
chr19	52452094	52452447	0.0107491823462616	1	0.0148535962514867	1	-0.0265498510206089
chr1	18060276	18060505	0.00437188845134852	1	0.0148993519167571	1	0.0471068003601201
chr1	152298884	152299078	0.00439594285823352	1	0.0149322959957518	1	0.0422775517481857
chr16	81039227	81039458	0.00443228592950542	1	0.0149699463717457	1	0.0340307225811348
chr7	27166853	27167828	0.0108767752871299	1	0.0149707307545789	1	0.0361550632960433
chr1	228463260	228463720	0.00443385469517184	1	0.0149736068249673	1	0.0140103962880781
chr16	2908892	2908934	0.0044539871878908	1	0.0149987070756299	1	0.0197473794760843
chr6	27258635	27259043	0.00929964287049604	1	0.0150347886859574	1	-0.0231740028995138
chr16	75150784	75150833	0.0109952170949441	1	0.015081328734061	1	0.0203272953514493
chr13	114193150	114193224	0.00460903352792128	1	0.0151759775959346	1	0.0220229596974747
chr3	196756621	196756875	0.0110998014727049	1	0.0151856516508775	1	0.0115674098830261
chr1	92683403	92683514	0.00463413377858389	1	0.0152036924560412	1	-0.0203686006756145
chr2	40006334	40006561	0.0046351796223615	1	0.0152052612217076	1	-0.012147231068448
chr11	102638494	102638778	0.0111215027310903	1	0.0152060456045408	1	-0.0228961640252355
chr2	48982832	48983178	0.0111858221234132	1	0.0152614753247541	1	0.0270905897866441
chr16	68564110	68564532	0.00468250405329829	1	0.015268534770253	1	0.00837005418012485
chr17	79892777	79893060	0.0111999410144109	1	0.0152755942157518	1	-0.0141081519289684
chr6	28601365	28601377	0.00471570959323736	1	0.0153135060526901	1	-0.0148462801156684
chr2	226896008	226896225	0.00472799825762427	1	0.0153263176389658	1	-0.0215818164224709
chr1	4770935	4771682	0.00474237860956639	1	0.0153448813660184	1	0.0241279061549169
chr12	131701622	131701888	0.0112765490711208	1	0.0153501105849064	1	0.0249473783980881
chr12	53172158	53172600	0.00476486425078497	1	0.0153715503823474	1	0.0353517168074461
chr2	121708506	121708556	0.00477166223533943	1	0.0153807015154015	1	0.0523549946664408
chr13	38444087	38444227	0.00477218515722823	1	0.0153812244372903	1	-0.0212948995413219
chr1	3574507	3574999	0.00477741437611628	1	0.0153908984922332	1	0.0466206673134747
chr11	98437855	98437985	0.00482813779933029	1	0.0154418833763916	1	0.0365461318339876
chr2	133173643	133174035	0.0048524536671597	1	0.0154756118382195	1	0.0163921308561435
chr19	49106849	49107057	0.00487127885515665	1	0.0154960057918828	1	-0.0138785077157429
chr22	17897985	17898286	0.00487363200365627	1	0.0154980974794381	1	0.0389554360811957
chr22	21987048	21987190	0.00487650807404469	1	0.0155051569249369	1	0.0312722671505655
chr18	47825070	47825363	0.0114742135450888	1	0.0155247664957671	1	-0.0139492505293645
chr5	1879698	1880310	0.0114836261390873	1	0.015535747855432	1	0.0178758823390095
chr1	63785321	63785946	0.0115006211004734	1	0.0155522198949293	1	0.0289016340116969
chr6	28984341	28984461	0.00932160558982582	1	0.015558494957595	1	0.00843853774370451
chr8	95246514	95246814	0.00495834534964257	1	0.015593007802256	1	0.0365530568584114
chr2	242004824	242005101	0.00500253224924653	1	0.0156413780769704	1	0.033715921239602
chr4	74702421	74702713	0.0116572362061703	1	0.0156931473439621	1	-0.0154544155254904
chr4	1514621	1515209	0.00507469546990153	1	0.0157336737903444	1	0.0162463720007204
chr10	134778176	134778648	0.00510816247078501	1	0.0157668793302835	1	0.0206333280912877
chr4	8373438	8373553	0.00515705566738821	1	0.0158189100582195	1	0.0288889822698721
chr1	3613808	3614578	0.0118373827968634	1	0.0158586521217686	1	0.0324479562742208
chr1	153177032	153177577	0.00520098110604778	1	0.0158662344891563	1	0.0368014960953628
chr8	143359879	143360109	0.00521222392665707	1	0.0158761700050436	1	0.0403076301347673
chr4	156874602	156875105	0.0119168669239617	1	0.0159305538814792	1	-0.0150871587638004
chr2	84743523	84743573	0.0120026261137256	1	0.0160076848600779	1	-0.0120939207653575
chr9	5185415	5185951	0.0120329555832762	1	0.0160395830952949	1	-0.0239314895278218
chr20	56227286	56227686	0.00537825162635244	1	0.0160649448069019	1	0.0316286391657155
chr13	96744126	96744289	0.00538923298601733	1	0.0160777563931776	1	0.0276242788381343
chr6	68598642	68598790	0.0054457085500082	1	0.016139722637001	1	0.0298534494782259
chr4	8374182	8374697	0.0121435535627583	1	0.0161543644498875	1	0.0223325558610561
chr17	1358234	1358505	0.00547995993372488	1	0.0161810334662165	1	0.0236884006415983
chr2	43020169	43020457	0.00548440476977972	1	0.0161862626851045	1	0.01033400914734
chr3	37033791	37033903	0.00549852366077743	1	0.0162011659589355	1	-0.0295177413951111
chr1	182026044	182026510	0.00555055438871346	1	0.016266531195036	1	0.0214376108558146
chr8	141348919	141349212	0.00558846622565178	1	0.0163033971881967	1	0.016121094909083
chr8	15397637	15397899	0.0122985999027888	1	0.0163128097821952	1	-0.00830411124192776
chr12	56616029	56616161	0.00572599468240731	1	0.0164448475591183	1	-0.0356230958319395
chr2	157292018	157292411	0.01249051223598	1	0.0165015845840535	1	-0.0222277374427424
chr19	49633674	49633902	0.00581750601294807	1	0.0165455100227131	1	-0.0205466263666361
chr20	45280237	45280288	0.00589254530399149	1	0.016626039993589	1	0.015519147951336
chr5	177811198	177811648	0.00590012767137915	1	0.0166344067438098	1	0.0333436610974994
chr6	168811070	168811287	0.00592601230487497	1	0.0166608142991945	1	-0.0259073433851084
chr10	3678924	3679085	0.00592810399243018	1	0.0166629059867497	1	0.0253742671695787
chr6	39902298	39902356	0.0126832089520044	1	0.0166984646751884	1	0.0015811299464118
chr14	99664107	99664243	0.00603687174530148	1	0.0167844853258967	1	0.0424978882298072
chr19	9608947	9609204	0.00606171053501969	1	0.0168074938890041	1	0.0128300831672661
chr5	72528296	72528766	0.0128207374087599	1	0.0168393921242211	1	-0.0216132483767907
chr17	41278179	41278241	0.00614067174022914	1	0.0168875009379911	1	-0.0176613470053458
chr7	155255232	155255791	0.0128759056680288	1	0.0169031885946553	1	0.0337318278091494
chr10	134298584	134298762	0.00620708282010729	1	0.0169635860728122	1	0.0331022367836608
chr5	177876830	177876930	0.00624028836004636	1	0.0170020208316393	1	0.0362349960587053
chr10	88730823	88731069	0.00624290296949038	1	0.0170062042067497	1	0.0142735693075796
chr19	5871012	5871323	0.0129883338741217	1	0.017020061636803	1	-0.0143123756620154
chr19	58879857	58879943	0.00625806770426571	1	0.0170221533243583	1	-0.0213075338380162
chr11	73668626	73669290	0.0130641575479983	1	0.0170945780059577	1	-0.0159565090858378
chr5	95768997	95769025	0.0130764462123852	1	0.0171089583578998	1	0.0129456465562113
chr8	22423014	22423055	0.0130955328613266	1	0.0171309210772295	1	0.00798353539188409
chr4	124426923	124427045	0.0064021326846313	1	0.0171690943751123	1	-0.0324218988558781
chr4	13300487	13300507	0.00645913117051097	1	0.017228707470436	1	0.0369896497188166
chr1	50513654	50513749	0.00646645207695423	1	0.0172373356816012	1	-0.0168092575846727
chr20	44097320	44097731	0.013221295575584	1	0.0172817840421496	1	0.0319185795824294
chr12	53075359	53075482	0.00653652361005401	1	0.017303485300535	1	0.0433266342122494
chr17	1082526	1082774	0.0066081639088202	1	0.0173764329040232	1	0.013556186784305
chr17	36665844	36666462	0.00663117247192759	1	0.0174033633812966	1	0.0125746860530355
chr11	118842392	118842484	0.0133439207585087	1	0.0174198354207939	1	-0.024112922826463
chr20	31595115	31595360	0.00667718959814237	1	0.017449119046567	1	0.0432655837623138
chr12	126467949	126468463	0.0133758189937257	1	0.0174514721950666	1	0.0100848399950753
chr6	137366346	137366492	0.0133826169782802	1	0.0174590545624543	1	-0.0132843409631838
chr17	9676126	9676243	0.00671980773207992	1	0.0174885996491717	1	0.0434872668267974
chr5	51813651	51813682	0.00672634425568998	1	0.0174938288680597	1	0.0341731874802396
chr7	155100517	155100559	0.00678125105401443	1	0.0175563180337719	1	0.0314195613706961
chr17	68171276	68171750	0.00681262636734269	1	0.0175900464955997	1	-0.0203717624777654
chr10	35080979	35081084	0.00687773014249883	1	0.017665608708532	1	0.0224649212098674
chr19	11199903	11199965	0.0135852492101919	1	0.0177027361626371	1	0.0150698809580819
chr5	176559881	176560116	0.00696061326187431	1	0.0177453542965746	1	-0.0210533334025736
chr4	57181252	57181518	0.00696505809792915	1	0.0177508449764071	1	-0.0262892226153351
chr6	88757358	88757392	0.0136691781733449	1	0.0178083663841755	1	-0.0196231212144489
chr20	52790589	52790733	0.0136900950488971	1	0.0178386958537262	1	-0.0127819148707509
chr2	71503883	71504232	0.00707905506968849	1	0.0178705940889433	1	0.0150101336118878
chr10	71892593	71892719	0.0137374194798339	1	0.0178894192769402	1	0.0189116270390348
chr12	130645423	130645566	0.0071167054456824	1	0.0178990933318831	1	0.0161126100894383
chr1	1017019	1017383	0.0137499696051652	1	0.0179048454726599	1	-0.00474601245161399
chr12	4382181	4382188	0.00715566312639833	1	0.0179398812392098	1	-0.00730653314609229
chr16	89588846	89589025	0.00716716740795202	1	0.0179526928254855	1	0.0207366347082244
chr13	25338287	25338390	0.00741163339096804	1	0.0181877462145031	1	0.0109894792288103
chr4	135248601	135248622	0.00755282230094521	1	0.018320306913315	1	-0.0303012468412177
chr13	114150007	114150139	0.00756746411383173	1	0.0183328570386463	1	0.0326721363659644
chr5	172662724	172663219	0.0141256889822711	1	0.0184160016189662	1	0.0314811276373643
chr22	42195972	42196210	0.00765400768642884	1	0.0184186162284102	1	-0.0232536736121574
chr17	16875129	16875558	0.00768878199203433	1	0.0184528676121269	1	0.0342120921121456
chr19	49133421	49133647	0.00769008929675634	1	0.0184541749168489	1	0.0193165352616754
chr7	156795914	156796550	0.0141667383505423	1	0.0184732615657902	1	0.0413752420939565
chr21	40759659	40759694	0.00775179407963525	1	0.0185148338559502	1	0.0128111270925242
chr19	12831659	12832212	0.0141983751248149	1	0.0185211089186158	1	0.0183640479421902
chr19	19626525	19626605	0.0142532819231394	1	0.0186052993427133	1	-0.0211673230905458
chr12	75699417	75699625	0.0142817811660792	1	0.0186426882577628	1	-0.0206407499487207
chr15	70233653	70233856	0.00788670792694677	1	0.0186463487109845	1	0.0384533688368451
chr11	45714772	45714930	0.00789507467716763	1	0.0186549769221497	1	0.0408393434422289
chr13	40762150	40762260	0.00793821573299399	1	0.0187023013530865	1	0.040019226723407
chr7	97911938	97912641	0.0079627930617678	1	0.0187224338458055	1	0.0191273408949906
chr19	46282571	46283080	0.00798004948409834	1	0.0187360298149144	1	0.0235599351216527
chr20	26188639	26188919	0.00801090187553779	1	0.0187606071436882	1	-0.0370803477339711
chr1	152747472	152747562	0.00802868121975714	1	0.0187757718784635	1	0.0267638933476751
chr2	131583843	131583921	0.00805273562664214	1	0.0187995648244041	1	0.0159161723241867
chr11	74178114	74178462	0.00808280363524839	1	0.0188304172158436	1	0.0210736556790038
chr1	214162308	214162604	0.00820882781045023	1	0.0189527809378238	1	-0.0214805224726262
chr3	44596665	44596770	0.00823157491261322	1	0.0189742207352648	1	-0.024285216749026
chr11	2949813	2950092	0.00823262075639082	1	0.018975005118098	1	0.0230633898533719
chr1	1377656	1378060	0.0082543220147762	1	0.0189938303060949	1	0.0404026754893718
chr9	126776767	126777160	0.00826216584310827	1	0.019001674134427	1	-0.020827157663083
chr18	34916713	34916814	0.00832177893843196	1	0.0190544892451962	1	0.0421754853699683
chr7	601283	601503	0.008399171377975	1	0.0191316202237949	1	0.0381424449727967
chr16	27414272	27414536	0.0146593307697959	1	0.0192437869689434	1	0.0272517361603059
chr14	51296586	51296728	0.00852153509995521	1	0.0192437869689434	1	0.0234355784193169
chr6	30955992	30956221	0.00852911746734287	1	0.0192479703440538	1	0.0325229341917882
chr3	127795340	127795571	0.00861356935238477	1	0.0193326836900401	1	0.0140421987225778
chr1	15375064	15375511	0.0147351544436726	1	0.0193645819252572	1	0.0293236401399057
chr1	6294656	6294850	0.0086896544872058	1	0.0194043239888063	1	0.0327391597660071
chr1	5540565	5540878	0.00872129126147846	1	0.0194343919974126	1	0.0174569870381339
chr22	30901249	30901647	0.014891508088425	1	0.0196210751117157	1	0.0240512744588117
chr4	187476455	187476569	0.00895294565821878	1	0.0196542806516548	1	0.00979343010348607
chr6	31371539	31371557	0.0149223604798645	1	0.0196704912302077	1	0.0210915952966467
chr10	101089149	101089972	0.00901438898015328	1	0.0197157239735893	1	-0.0249299889519082
chr10	99798395	99798430	0.00902380157415176	1	0.0197248751066434	1	0.0283796473142619
chr1	153174654	153175248	0.00910250131841681	1	0.0197910247255771	1	0.0348795375310773
chr8	1821404	1821860	0.00911609728752572	1	0.0198017446242976	1	-0.0319189605257915
chr11	13518676	13519025	0.00920813153995528	1	0.0198875038140615	1	0.0297970795708038
chr22	25160033	25160098	0.00925414866617007	1	0.0199282917213883	1	-0.0179613801719021
chr6	32306040	32306373	0.00954776930673369	1	0.0201884453610684	1	0.0348285032815487
chr3	169487235	169487675	0.0152165040423169	1	0.0201936745799565	1	0.00751216585855076
chr10	124638874	124638983	0.00959849272994771	1	0.0202326322606724	1	-0.0197157711330195
chr20	57463903	57463974	0.0152405584492019	1	0.0202443980031705	1	0.00573402282634516
chr12	62585031	62585467	0.00961418038661184	1	0.0202454438469481	1	-0.0202602933170358
chr6	170531660	170531847	0.00962385444155472	1	0.0202540720581134	1	0.0292708795559341
chr15	37403088	37403242	0.0153014788492476	1	0.0203785274676488	1	0.0313145679146836
chr16	88480701	88481008	0.00979301967258292	1	0.0204015360307562	1	0.0532130984729696
chr4	1243849	1244017	0.0153697201557366	1	0.0205241612136808	1	-0.0145202147798548
chr15	35384714	35385240	0.00995303377055704	1	0.020547692698677	1	0.0329493148069256
chr4	154681066	154681197	0.00995826298944508	1	0.0205534448394538	1	0.0173874920332499
chr17	76521075	76521202	0.0100254584521564	1	0.0206062599502231	1	0.0465195992064622
chr5	1727797	1728443	0.0154089392973969	1	0.0206148881613883	1	0.029638886279008
chr5	72597015	72597316	0.0154298561729491	1	0.0206708408034904	1	-0.0193002756578132
chr12	21927425	21927773	0.0154489428218905	1	0.0207079682575955	1	-0.0185939832913411
chr11	45711244	45711402	0.0101478221741366	1	0.020716073546872	1	0.0307032799096831
chr20	21681966	21682505	0.0102008987458503	1	0.0207620906730868	1	0.0399433925434502
chr1	35586453	35586588	0.0102275677621793	1	0.0207850992361941	1	-0.0168918398807236
chr2	1817351	1817891	0.0102346272076782	1	0.020792158681693	1	0.0311562822922022
chr14	105851883	105852272	0.015514308057991	1	0.0208645833632924	1	-0.0149300187694634
chr19	1907972	1908328	0.0103815682584322	1	0.020917659935006	1	0.0309944280679821
chr4	140216130	140216277	0.0104194800953705	1	0.0209540030062779	1	0.0208650986002202
chr13	79183424	79183694	0.0105473344971832	1	0.0210672155952041	1	-0.0131804616783004
chr12	130554977	130555091	0.0105912599358427	1	0.0211069576587532	1	0.0370792585712849
chr17	48263189	48263204	0.0106861702586607	1	0.0211838271764074	1	-0.0147423265600389
chr18	13136899	13137315	0.0107303571582647	1	0.0212212160914569	1	-0.0241647017955903
chr6	168867541	168867685	0.0108265747858047	1	0.0213004387576108	1	-0.0253854955929201
chr8	29732519	29732579	0.0156782440701311	1	0.0213108971953869	1	0.0145493228099932
chr12	52749958	52750508	0.0108524594193005	1	0.0213237087816626	1	0.0372161339761178
chr1	20304962	20305685	0.0109057974519585	1	0.0213699873688218	1	0.029894239664462
chr19	4328745	4328818	0.0109261914056219	1	0.0213843677207639	1	0.0157544244328019
chr10	73723753	73723920	0.0109408332185084	1	0.0213992709945948	1	-0.0224983581356214
chr5	177980691	177980944	0.0109641032425602	1	0.0214183576435362	1	0.0345937458396001
chr13	28493913	28494004	0.010968548078615	1	0.0214209722529802	1	0.00936732731465292
chr7	27193351	27194013	0.0109774377507247	1	0.0214275087765903	1	0.0377149265851388
chr15	35087616	35087773	0.0157237382744571	1	0.0214353526049223	1	0.0145018496923165
chr12	91775247	91775501	0.0110281611739387	1	0.0214690810667502	1	0.027167188480947
chr1	228468281	228468624	0.0110705178469319	1	0.021496273004968	1	-0.0134034569517105
chr1	228466616	228466971	0.0111607218727506	1	0.0215736654445111	1	-0.0128873143628224
chr4	94124971	94125068	0.0112122296787978	1	0.0216196825707258	1	0.0308999766506001
chr1	213189641	213189823	0.0112143213663531	1	0.0216215127973367	1	-0.0351200526793359
chr10	118387095	118387327	0.0112289631792396	1	0.0216332785398348	1	0.0220921743640936
chr7	64349133	64349557	0.0158251851208852	1	0.0217370785347624	1	0.0133907546072037
chr6	32303790	32304143	0.0113523727449974	1	0.0217423077536505	1	0.036353637012799
chr15	93152363	93152765	0.0158291070350512	1	0.0217454452849833	1	0.0230128372740264
chr7	99517279	99517295	0.0113562946591634	1	0.0217457067459277	1	-0.0122108562005495
chr11	2603011	2603429	0.011402834707267	1	0.0217844029656992	1	-0.0166652877692537
chr17	57915665	57915740	0.0114355173253173	1	0.0218110719820282	1	0.0180134888271209
chr6	168857803	168858319	0.0114624478025907	1	0.0218364336936352	1	-0.0202202540278532
chr10	124402817	124402963	0.0115084649288055	1	0.0218722538430183	1	0.0230392976136419
chr10	22623213	22623548	0.011519184827526	1	0.0218803591322948	1	-0.0264824212961136
chr10	49893336	49893423	0.0158889815913193	1	0.0219284679460648	1	0.023374822555947
chr10	6472750	6472833	0.0116276911194529	1	0.021973439228502	1	0.0304026273065117
chr3	124931162	124931627	0.0116373651743958	1	0.0219823289006116	1	-0.033976073517817
chr1	228462007	228462316	0.0116619425031696	1	0.022004030158997	1	-0.0146595727757155
chr1	2163437	2163529	0.0116854739881658	1	0.0220249470345492	1	0.0218305047474339
chr2	27938071	27938371	0.0117024689495519	1	0.0220393273864913	1	-0.0277161524367693
chr8	145027948	145028103	0.011742211013101	1	0.0220730558483192	1	-0.00574922190380453
chr6	33172551	33172817	0.011761036201098	1	0.0220879591221501	1	0.0124132419385258
chr16	88479315	88479546	0.0117981636552031	1	0.0221219490449224	1	0.0523995548761718
chr13	114145973	114146138	0.0118935968999099	1	0.0222030019376871	1	0.0312498046705932
chr1	2303963	2304264	0.0119126835488512	1	0.02221921251624	1	0.0345176587028729
chr3	51996834	51997385	0.0120177908485009	1	0.0223041873231707	1	0.0295191705334583
chr11	65810516	65811095	0.0121014583507096	1	0.0223627545747168	1	-0.0182401733999006
chr1	204980933	204981786	0.0121137470150965	1	0.0223734744734373	1	0.0346281828667069
chr12	53200448	53200975	0.0121451223284248	1	0.0224022351773215	1	0.0317176542432852
chr19	36822311	36822549	0.0122138865568025	1	0.0224592336632012	1	0.0200715967504161
chr12	53183047	53183773	0.0122402941121871	1	0.0224804119996978	1	0.0283706010463494
chr2	154727907	154728062	0.0122823893242359	1	0.0225162321490808	1	-0.0181236707315095
chr1	230457631	230457961	0.0123257918410066	1	0.0225575429782964	1	0.0423445854661637
chr12	108523395	108523409	0.0124314220625451	1	0.0226378114882279	1	0.00770043477628612
chr10	118083701	118083830	0.0124583525398185	1	0.022661342973224	1	-0.021244438372791
chr19	44763979	44764101	0.0125749641210219	1	0.0227622668977633	1	-0.0265464655397913
chr12	34457912	34458462	0.0126594160060638	1	0.0228289394385858	1	-0.0199620960202105
chr21	48054563	48055212	0.0127582482430478	1	0.0229126069407945	1	-0.0172899464381395
chr15	45315307	45315362	0.0129765681316236	1	0.0230859555469332	1	0.0152928805313101
chr15	27216277	27216529	0.0130398416801689	1	0.0231317112122035	1	-0.0245516111754666
chr12	130571246	130571342	0.0130641575479983	1	0.0231513207830337	1	0.020224037757565
chr1	6534449	6534951	0.0131501781987067	1	0.0232263600740771	1	0.029742258658799
chr1	6137768	6138086	0.0131752784493693	1	0.0232470154886849	1	0.0272859944442425
chr4	183167912	183168158	0.0132267862554165	1	0.0232896336226224	1	0.0296107631204129
chr1	1022900	1022995	0.0132443041386914	1	0.0233019222870093	1	-0.00870483080513529
chr14	104746527	104746687	0.0132738492254089	1	0.0233264996157831	1	-0.0126519330426216
chr1	20669407	20669905	0.0162471830851502	1	0.0233730396638867	1	0.0217231272651246
chr19	46032528	46032854	0.0133345081645102	1	0.0233756542733307	1	-0.0184669758144827
chr11	2598247	2598653	0.0133658834778384	1	0.0234007545239934	1	-0.0147435280578899
chr10	71583235	71583771	0.0134587021131012	1	0.0234687343695379	1	0.034983628408111
chr12	9227195	9227320	0.0134916461920959	1	0.0234917429326453	1	0.0329028909409174
chr17	36997449	36997720	0.0162728062577017	1	0.0235152744176415	1	-0.0133669797591597
chr9	136399386	136400057	0.0136519217510144	1	0.0236175056469027	1	0.0314620593648667
chr19	23076606	23077008	0.0137473549957212	1	0.0236935907817238	1	-0.0238282510001868
chr8	99952217	99952749	0.0138359902558735	1	0.0237728134478776	1	-0.022572427876076
chr14	99738006	99738452	0.0139340381100243	1	0.0238454995904214	1	-0.0162967964712732
chr17	46810540	46810702	0.013985807377016	1	0.0238917781775806	1	-0.00743692661455442
chr3	147126703	147126763	0.0139946970491256	1	0.0238977917793019	1	-0.0376102068526175
chr7	106508080	106508672	0.0140082930182345	1	0.0239095575218	1	-0.0224137778028892
chr20	46414934	46414999	0.0140320859641751	1	0.0239268139441305	1	-0.0119602385116577
chr5	178692691	178692806	0.0141018960363305	1	0.0239866885003986	1	0.0133059404638158
chr12	62585877	62586267	0.0141737977960411	1	0.0240473474394999	1	-0.0234226469753001
chr7	130626376	130626559	0.0142077877188134	1	0.0240711403854405	1	-0.0290136505941206
chr19	52216726	52217388	0.014234195274198	1	0.0240920572609927	1	-0.0180837091626407
chr21	43299840	43300024	0.0144153877086687	1	0.0242410899993019	1	-0.0142986143450788
chr12	132219328	132219811	0.0144161720915019	1	0.0242423973040239	1	-0.0234124216140956
chr8	10207852	10207915	0.0144561756159954	1	0.0242740340782966	1	0.0262970351884682
chr3	96533699	96534005	0.0145286002975948	1	0.0243339086345647	1	-0.0224051449292902
chr12	127630550	127631198	0.0145424577276482	1	0.0243427983066743	1	0.0243484960325703
chr17	47210318	47210599	0.014743259732949	1	0.0245033353265373	1	-0.0109258931224325
chr1	14113172	14113230	0.0148201292506033	1	0.0245645171875274	1	-0.0213960499979854
chr16	33964783	33965322	0.0148899393227586	1	0.0246230844390735	1	-0.0202708422513764
chr19	1207124	1207644	0.0149166083390877	1	0.0246437398536812	1	0.0179333808506246
chr16	88164417	88164581	0.0149579191683032	1	0.0246740693232319	1	0.0308402477469547
chr17	61524073	61524304	0.014962364004358	1	0.0246774683155091	1	-0.00979929506463473
chr15	92399195	92399897	0.0149908632472979	1	0.0246991695738945	1	0.0515068983819545
chr2	119067637	119067828	0.0150180551855157	1	0.0247242698245571	1	-0.0312985257925617
chr20	3145178	3145597	0.0164419714887299	1	0.0247744703258823	1	-0.0132844480600104
chr10	18999145	18999313	0.015198986159042	1	0.0248649358126455	1	0.0364527134601359
chr15	69323995	69324156	0.0152609524028653	1	0.0249093841731938	1	0.00951290679526924
chr14	64760831	64761203	0.0164626269033376	1	0.0249922672925693	1	0.00707090284543471
chr16	20709100	20709548	0.0154031871566201	1	0.0250069091054558	1	0.0286710381528992
chr2	237068350	237068750	0.0154241040321722	1	0.0250244269887308	1	0.0439581207336012
chr5	80382795	80383136	0.0154455438296132	1	0.0250403761063393	1	-0.025055773024625
chr1	204966000	204966197	0.0154656763223322	1	0.0250547564582814	1	0.0349205384422173
chr2	60763357	60763808	0.0155613710279834	1	0.0251316259759357	1	0.0399669633835256
chr17	48845009	48845064	0.0156147090606414	1	0.02517345972704	1	-0.0241081159082659
chr1	7811235	7811409	0.0157938098075569	1	0.02531778616835	1	0.0252536336448839
chr22	46366859	46367203	0.00260833438135595	1	0.0253350425906805	1	0.0237058457390043
chr2	200137014	200137080	0.015834859175828	1	0.0253546521615107	1	-0.00890405141947315
chr8	49390241	49390373	0.00261591674874361	1	0.0253593584585099	1	0.0302706752865459
chr6	168925633	168925698	0.0158440103088821	1	0.0253648491383424	1	-0.0261003919463498
chr20	57465439	57465448	0.0158633584187679	1	0.0253776607246181	1	0.0122415405471015
chr14	106916597	106916953	0.00263055856163014	1	0.0254106048036128	1	-0.0295623757980731
chr6	168920947	168921237	0.00264415453073905	1	0.0254558375469943	1	-0.0290216500746707
chr5	36608598	36608769	0.00265147543718231	1	0.0254780617272685	1	0.039320482196566
chr3	96533295	96533520	0.0160035014849674	1	0.0254908733135442	1	-0.0205514644967991
chr6	230908	230959	0.0160706969476788	1	0.0255444728071467	1	0.0321149628140934
chr4	170679019	170679069	0.00268389659428818	1	0.0255680042921429	1	-0.0294951864416718
chr6	32267874	32268374	0.0161025951828959	1	0.0255682657530873	1	0.0296073187062045
chr7	140135299	140135515	0.0161378924103901	1	0.0255951962303607	1	-0.0234823445647554
chr11	2951243	2951281	0.0161585478249979	1	0.0256100995041916	1	0.0163251151888321
chr2	37571729	37571901	0.0161802490833833	1	0.0256268330046334	1	0.0165714168995451
chr7	25703644	25703841	0.00270533639172915	1	0.0256393831299647	1	0.0486473919787489
chr3	171527257	171527346	0.00270925830589519	1	0.0256537634819068	1	0.029757632043091
chr4	7427195	7427446	0.016219729685988	1	0.025659777083628	1	0.0357169485030837
chr10	37414597	37414802	0.0162477060070391	1	0.025682524185791	1	-0.0345646861101589
chr3	124860616	124860871	0.0162534581478159	1	0.025686446099957	1	-0.0139415978818836
chr5	145236139	145236262	0.0162976450474199	1	0.0257214818665069	1	0.01020573843913
chr11	128563685	128563716	0.0164001377376255	1	0.0258061952124932	1	-0.0191792581755983
chr2	4600947	4600973	0.00276233487760882	1	0.0258197911816021	1	0.0301730331846353
chr14	94759646	94759767	0.016432297433787	1	0.0258305110803226	1	0.0233532133545443
chr12	10658281	10658539	0.0027837746750498	1	0.0258804501207034	1	0.0242377901148074
chr11	1669926	1670305	0.016553876772934	1	0.0259298662391955	1	0.0234857911617253
chr5	121412702	121413050	0.016601985586704	1	0.0259669936933006	1	-0.020112945177351
chr1	152483199	152483675	0.0166291775249218	1	0.0259892178735747	1	0.0313636819037082
chr12	108237937	108238461	0.0166686581275265	1	0.0260213775697362	1	-0.014098136490561
chr10	91296311	91296457	0.00284574091887311	1	0.0260503997345648	1	0.0412584679109189
chr14	104582743	104583067	0.0167803019507863	1	0.0261053065328893	1	0.0140620189060041
chr1	109204304	109204325	0.0168187367096134	1	0.02613563600244	1	-0.028347840101657
chr1	110672912	110673082	0.00287293285709094	1	0.026136943307162	1	0.032689839374892
chr6	168841866	168842035	0.016916000180931	1	0.0262185191218154	1	-0.0277647398259455
chr9	139398998	139399348	0.00290247794380838	1	0.0262266244110919	1	0.0442818050240559
chr8	144371537	144371779	0.0169411004315936	1	0.026239697458312	1	0.027404456582219
chr3	64084951	64085148	0.0169897321672524	1	0.0262844072798048	1	-0.0164241243763765
chr17	1083491	1083824	0.00292104167086094	1	0.0262885906549152	1	0.0207649021102742
chr10	62023553	62023665	0.0170205845586918	1	0.0263068929210234	1	0.0185617171989154
chr7	27153636	27153663	0.0170381024419668	1	0.0263231034995763	1	-0.0291480460797027
chr7	127744210	127744389	0.00293333033524784	1	0.0263246722652427	1	0.0344297577600544
chr2	160143690	160143772	0.00293516056185865	1	0.0263301629450752	1	-0.0260292779306312
chr21	31655261	31655654	0.0170783674274047	1	0.026354740273849	1	-0.0260640315633822
chr1	50513870	50513927	0.00295084821852278	1	0.026380101985456	1	-0.0213888003658446
chr1	64935571	64935606	0.00297333385974137	1	0.0264441599168345	1	-0.0203425835428183
chr15	45571217	45571636	0.017284660112538	1	0.0265265201143212	1	0.00820653102616378
chr13	36788926	36789025	0.00300470917306963	1	0.0265380243958749	1	-0.0375848118831414
chr11	68611328	68611596	0.0173081915975342	1	0.0265479599117622	1	-0.0143749123484284
chr11	2563802	2563897	0.00302824065806582	1	0.0266054813195306	1	-0.0267751885106881
chr17	2831573	2831903	0.0173874142636881	1	0.0266188158276951	1	0.0196430435984168
chr11	120894635	120894785	0.0174219271083492	1	0.026646007765913	1	-0.0083098210876988
chr1	152595322	152595351	0.00305438675250604	1	0.0266826122981293	1	0.0435066291008027
chr11	67979160	67979344	0.0175563180337719	1	0.0267566057453951	1	0.0252131514254515
chr4	8034100	8034335	0.00309752780833239	1	0.0268190949111072	1	0.0321467421853506
chr11	107583339	107583406	0.0176344948561481	1	0.0268201407548848	1	-0.0221271940178063
chr7	53879253	53879422	0.0176810349042517	1	0.0268604057403227	1	0.0178206050486545
chr6	106433985	106434169	0.0178381729318374	1	0.0269974112751895	1	0.0326109987989956
chr14	95106927	95107019	0.00316001697404451	1	0.0269997644236891	1	0.0510361990791374
chr2	237478664	237479015	0.00316341596632174	1	0.0270073467910768	1	0.0422633689285135
chr19	50464713	50464887	0.0178839285971078	1	0.0270395064872382	1	-0.0255442537497629
chr4	974821	975006	0.017930207184267	1	0.0270771568632321	1	-0.00709561943307457
chr20	22565228	22565240	0.00319348397492799	1	0.0270839548477866	1	-0.0224090547939909
chr6	168811930	168812152	0.0179550459739852	1	0.0270970278950067	1	-0.0206856116612278
chr5	1864520	1864666	0.0179866827482578	1	0.0271255271379465	1	0.0178045694673723
chr2	63287082	63287288	0.00321230916292494	1	0.0271433064821659	1	-0.0319900714792536
chr19	9846398	9846701	0.0180321769525838	1	0.0271642233577181	1	-0.0139198775719455
chr1	57432110	57432150	0.00323976256208717	1	0.0272201759998201	1	0.0327343257002105
chr5	177823864	177824403	0.0181398988616775	1	0.0272546888444812	1	0.0220215345865921
chr11	75140541	75140681	0.0182091860119441	1	0.0273203155415261	1	-0.0137053133971596
chr19	39055500	39055712	0.00330643510290972	1	0.0274094737235673	1	-0.0312032521326446
chr1	28261552	28261706	0.0183519436875876	1	0.0274405875759511	1	0.0155091998797345
chr2	207988651	207988952	0.0183600489768641	1	0.0274492157871164	1	-0.0181611985812248
chr14	73712256	73712491	0.0183720761803066	1	0.0274573210763929	1	0.0161917618750946
chr7	124404244	124404324	0.00334957615873608	1	0.0275164112498278	1	0.027430756355611
chr2	102803985	102804576	0.0184588812138481	1	0.0275357593597135	1	-0.0488187086517075
chr10	98946673	98946790	0.0184607114404589	1	0.0275370666644355	1	0.0397259960686002
chr5	38557085	38557143	0.00337153887806586	1	0.0275702722043746	1	-0.0208906493152728
chr1	18023561	18023668	0.00338539630811917	1	0.027614720564923	1	0.0397935920461572
chr6	10660286	10660390	0.00339193283172923	1	0.0276283165340319	1	-0.0433881023390437
chr5	135528543	135528954	0.0186149733976562	1	0.027669365902303	1	-0.0119145644467258
chr8	142482939	142483022	0.00341520285578102	1	0.0276827004104675	1	0.0393353047163063
chr14	101158095	101158251	0.0186683114303143	1	0.0277119840362406	1	-0.0316852377086515
chr12	52800423	52800873	0.00343167489527836	1	0.0277169517941842	1	0.0322214284360267
chr7	99516845	99517136	0.00343585827038879	1	0.0277292404585711	1	-0.015407965556604
chr19	45889164	45889464	0.00345180738799732	1	0.0277729044362863	1	-0.0453945857483365
chr1	179545668	179545668	0.00251499282420438	1	0.0279169694166519	1	-0.0478651330540522
chr8	22132563	22132665	0.0189485975627134	1	0.0279386706750373	1	-0.0196929400244353
chr2	133197577	133197577	0.00252179080875884	1	0.0279405009016481	1	-0.0776300374060078
chr11	14043404	14043404	0.00253957015297818	1	0.0279948847780837	1	0.0588956421817588
chr2	237874990	237874990	0.00254976712980987	1	0.02802495278669	1	0.091362429618356
chr16	21294947	21295413	0.0190986761448002	1	0.0280704469910159	1	-0.0199311857130677
chr11	2920146	2920209	0.0191101804263539	1	0.0280819512725696	1	-0.0156733406096692
chr4	186549051	186549051	0.00256780793497362	1	0.0280939784760121	1	-0.0454881400570213
chr17	21795257	21795257	0.00257094546630644	1	0.028104959835677	1	-0.0701062726015655
chr11	70458964	70459053	0.0191501839508474	1	0.0281180328828971	1	0.0229673727545899
chr2	144448686	144448686	0.00259369256846943	1	0.028199870158495	1	-0.0789952647421204
chr10	135333901	135334061	0.0192440484298878	1	0.0282006545413282	1	0.0136715272357324
chr2	127811805	127811853	0.00362280284563633	1	0.0282040535336054	1	-0.0242372404037307
chr5	150283885	150283885	0.00259787594357987	1	0.0282152963542147	1	-0.0521105752577685
chr5	157078822	157079312	0.0192777768917157	1	0.0282359517688225	1	-0.019108032839609
chr17	28562142	28562474	0.0193018312986007	1	0.0282581759490967	1	-0.0126255846031685
chr1	6999547	6999547	0.00261068752985557	1	0.0282607905585407	1	0.0813052527627717
chr6	32312351	32312513	0.00364554994779932	1	0.0282649739336511	1	0.0411514414580278
chr2	144915087	144915087	0.00261539382685481	1	0.02827203337915	1	-0.0565976942786425
chr7	37531741	37532191	0.0193339909947622	1	0.0282851064263701	1	-0.0214732892730466
chr13	25506131	25506340	0.0193481098857599	1	0.028296087786035	1	-0.0176802712966784
chr13	114292172	114292172	0.00265853488268117	1	0.0284281255629581	1	0.0688278460647165
chr14	96152464	96152529	0.0195002801554019	1	0.0284281255629581	1	0.0185761380797643
chr12	115107925	115108282	0.00372398823111997	1	0.0284576706496755	1	-0.0247873347627532
chr12	117042854	117042917	0.0196072176816624	1	0.0285185910497212	1	0.0358473323298371
chr6	46655782	46655820	0.0196762433709846	1	0.028583433363933	1	-0.0248909232519532
chr1	160865097	160865097	0.00269984571189671	1	0.0285884011218766	1	0.0748083746218157
chr2	24367828	24367828	0.00270507493078475	1	0.0286051346223184	1	0.0520035136926795
chr15	69883108	69883460	0.00379667437366377	1	0.0286456610687007	1	0.0450728450213018
chr8	688018	688417	0.0197776902174126	1	0.0286718071631409	1	-0.0120178904243359
chr19	40711928	40712074	0.0197891944989663	1	0.0286801739133618	1	-0.00976133624636832
chr20	55964273	55964459	0.00383746228099051	1	0.0287601809623488	1	-0.0166230471045657
chr2	213696794	213697049	0.0198854121265063	1	0.0287656716421813	1	-0.0255198132439732
chr2	78768994	78769016	0.0038609937659867	1	0.0288234545108942	1	0.0386204982883819
chr6	168106129	168106326	0.019989212121434	1	0.0288639809572765	1	0.028370926916506
chr2	183943938	183944048	0.00388243356342768	1	0.028874700855997	1	0.0171125732713516
chr15	61520370	61520873	0.0200088216922641	1	0.0288817603014958	1	-0.0156722913893313
chr14	98444513	98444533	0.00391668494714436	1	0.028954707904984	1	0.0368635321897196
chr10	4868331	4868335	0.020112098765303	1	0.0289745789367586	1	0.00857065484838715
chr2	99226287	99226313	0.00392479023642083	1	0.0289771935462026	1	0.0325439300160172
chr11	74178749	74178795	0.0202067476271766	1	0.0290574620561341	1	0.016380324225531
chr14	97685657	97685945	0.0202391687842824	1	0.0290859612990739	1	0.0225649349763308
chr1	152944334	152944810	0.00398675648024414	1	0.029121781448457	1	0.0467829634887088
chr5	1876337	1876397	0.00398910962874376	1	0.0291277950501783	1	0.0144060747973966
chr12	24103358	24103374	0.00400113683218626	1	0.0291589089025621	1	-0.0437397064325291
chr10	73724697	73725041	0.0203225748255467	1	0.0291649225042834	1	-0.0205020170978464
chr8	144906376	144906507	0.0203685919517615	1	0.0292044031068881	1	0.025496113268653
chr12	52947004	52947004	0.00288365275581143	1	0.0293019280391501	1	0.0849421916796176
chr10	111966029	111966094	0.0204844191501317	1	0.0293131708597594	1	0.0205146505937966
chr1	2501853	2501937	0.00407460735756327	1	0.0293450690949765	1	0.0402534875390227
chr2	1377754	1377856	0.0206031224188902	1	0.0294240303001859	1	0.026726125999
chr5	150281191	150281191	0.00292496358502697	1	0.0294439013319605	1	-0.052880524070436
chr12	54954337	54954400	0.020650446849827	1	0.0294684786607343	1	0.0137380885338784
chr22	49498271	49498376	0.0041266380854993	1	0.0294708318092339	1	0.0354960766578188
chr16	80574757	80575018	0.0206603823657143	1	0.029478675637566	1	-0.0131722430160851
chr18	32073245	32073466	0.0206669188893244	1	0.0294857350830648	1	-0.0145298683893332
chr12	9269178	9269671	0.00414284866405223	1	0.0295126655603383	1	0.0380633100081104
chr7	64295583	64295583	0.00294666484341235	1	0.0295304449045576	1	0.0610189800265721
chr14	73712902	73712967	0.00415932070354957	1	0.0295427335689445	1	0.00887592148740984
chr11	16625751	16626278	0.0207356831177021	1	0.029549531553499	1	-0.00992551258603379
chr22	45680687	45680702	0.0207822231658057	1	0.0295945028359361	1	0.00949092767687164
chr1	216774598	216774956	0.0208096765649679	1	0.0296203874694319	1	-0.0314927142880967
chr14	89016862	89016979	0.00422207133020609	1	0.0296925506900869	1	0.0285376811498618
chr1	152196106	152196597	0.020956617615722	1	0.0297581773871319	1	0.0302926331597452
chr3	137485266	137485369	0.00425606125297837	1	0.0297733421219072	1	0.0275904219080907
chr6	32942710	32942808	0.0210188453204897	1	0.0298164831777336	1	0.0176543196752673
chr7	64466846	64467056	0.0210345329771538	1	0.0298321708343977	1	-0.0123190924442426
chr16	88537187	88537374	0.0210358402818758	1	0.0298329552172309	1	0.0260422132325275
chr16	49499385	49499613	0.00428351465214059	1	0.029839491740841	1	0.04752977362504
chr1	3394709	3394871	0.0210878710098118	1	0.0298847244842225	1	0.0212294451720455
chr2	144498168	144498168	0.00304602000228517	1	0.029888907859333	1	-0.0556925081869206
chr6	40722820	40723038	0.0043086149028032	1	0.0299004121408867	1	0.0374786597022205
chr1	27668421	27668445	0.0211213380106953	1	0.0299174071022728	1	-0.0145596523243603
chr14	94844776	94844776	0.00306589103405973	1	0.029961071079988	1	0.0785126019067981
chr15	76639212	76639713	0.0211712770510761	1	0.0299644700722652	1	-0.019689052855747
chr1	153122203	153122203	0.00307112025294778	1	0.0299809421117625	1	0.0845990756193159
chr11	2920819	2921176	0.00435986124790602	1	0.0300015975263703	1	-0.0292101273595131
chr22	42763815	42764019	0.0213234473207182	1	0.0301009526852431	1	-0.0137351390801642
chr6	157825146	157825146	0.0031100779336637	1	0.0301234383264617	1	0.0452725987517282
chr2	237702390	237702420	0.00445790910205683	1	0.0302235778681677	1	0.0453684408787732
chr6	40299963	40299963	0.00313308649677109	1	0.0302277612432782	1	0.0665881532587874
chr7	155166856	155167283	0.0214920896298576	1	0.0302552146424404	1	0.0244291297101766
chr11	65733627	65733992	0.021536537990406	1	0.0302975713154335	1	0.0246199373104153
chr14	29236476	29236898	0.0215394140607944	1	0.0302999244639332	1	-0.0278468610683484
chr18	77495904	77496360	0.0215673903818454	1	0.0303268549412066	1	0.016932700433006
chr5	134825895	134825895	0.00317544316976424	1	0.0303940504039179	1	0.0501371001468552
chr6	32278653	32279016	0.00453582446348868	1	0.0304123526700261	1	0.0412037363701817
chr1	245843929	245843929	0.00318224115431869	1	0.0304175818889141	1	0.0329438875398466
chr8	75736301	75736723	0.00454340683087634	1	0.0304358841550223	1	-0.0238334269534372
chr8	4583355	4583386	0.00454837458881998	1	0.030448695741298	1	0.0462855678736494
chr2	145149645	145149645	0.0031955756624832	1	0.0304654292417397	1	-0.0600367379155048
chr8	48691052	48691176	0.0217049188386009	1	0.0304675209292949	1	0.0136733816333506
chr1	5779163	5779383	0.0217145928935438	1	0.030477979367071	1	0.0160836446666736
chr22	18463400	18463646	0.00457086023003857	1	0.0305049098443445	1	0.031193376996385
chr22	50025086	50025306	0.00457974990214824	1	0.030526088180841	1	-0.0321072441170885
chr4	113444372	113444577	0.00459046980086873	1	0.0305543259628365	1	0.0204601267409198
chr10	112260509	112260867	0.00459962093392281	1	0.0305804720572767	1	0.0203441838355227
chr1	93912688	93912802	0.00460955644981009	1	0.0306076639954945	1	0.0266058364574719
chr19	46580441	46580807	0.0218479379751889	1	0.0306081869173833	1	0.00640293294681515
chr1	152671348	152671707	0.00461504712964253	1	0.0306186453551594	1	0.0382436325951827
chr10	129794994	129795003	0.00462498264552982	1	0.0306442685277108	1	0.0543034007103584
chr6	48036212	48036409	0.0219125188284563	1	0.0306688458564846	1	0.0119093923010394
chr6	167250429	167250541	0.0219357888525081	1	0.0306926388024252	1	0.0200394226413103
chr6	168816724	168816771	0.00464537659919318	1	0.0306973450994244	1	-0.0271848640699451
chr9	68377657	68377657	0.00326643157841619	1	0.0307125098341998	1	-0.0834822997968881
chr2	9347943	9347973	0.0047559745786753	1	0.0309588060438266	1	0.0207923446036245
chr2	115919829	115919950	0.00475989649284133	1	0.0309692644816027	1	-0.0418103454798563
chr14	95027382	95027441	0.00477689145422747	1	0.0310142357640399	1	0.0426550023077117
chr7	23720292	23720454	0.0222877152836734	1	0.03102730881126	1	-0.000846506576039019
chr19	51870582	51870714	0.0223039258622263	1	0.0310458725383125	1	0.0114448623707828
chr7	29923538	29923883	0.0223224895892788	1	0.0310673123357535	1	0.0248303350603387
chr12	4919081	4919230	0.0223282417300557	1	0.0310712342499195	1	-0.0180272408499604
chr6	29719081	29719180	0.0223502044493855	1	0.0310955501177489	1	-0.015190913823961
chr4	5889238	5889332	0.00481401890833258	1	0.0311041783289142	1	0.0127172518458248
chr3	142681516	142681704	0.0223640618794388	1	0.0311094075478023	1	-0.0189366574692406
chr5	153862394	153862450	0.00484905467488247	1	0.0311752957057916	1	0.0216219003352618
chr5	1875013	1875188	0.0224239364357069	1	0.03117817177618	1	0.0127409698587795
chr13	97646341	97646731	0.0224445918503147	1	0.0312001344955098	1	-0.0111942876057387
chr14	37117706	37117758	0.00488409044143236	1	0.0312626236612219	1	-0.0249100421811431
chr13	94891445	94891445	0.00342958320772314	1	0.0312966135839942	1	-0.0758341660040067
chr8	143751796	143751801	0.00492357104403708	1	0.0313423692492646	1	0.0171004004717762
chr15	71185242	71185336	0.0226129726985096	1	0.0313651163514276	1	-0.0246034410491058
chr3	138668931	138669137	0.00499259673335925	1	0.0314963697455174	1	0.0181923664893264
chr10	74856741	74856741	0.00350697564726618	1	0.0315805601696149	1	-0.0157994253180855
chr2	21346738	21346892	0.0228373061888067	1	0.0315876196151138	1	0.0321228672291854
chr1	20813647	20813666	0.00504122846901805	1	0.0316061833421664	1	0.0249431091119851
chr4	109515707	109515707	0.00351900285070868	1	0.0316252699911077	1	0.0662928374176998
chr2	96930398	96930658	0.0229039787296293	1	0.0316569067653804	1	0.0145452629253096
chr1	3680345	3680420	0.00506214534457023	1	0.0316587369919912	1	0.0402725905319716
chr14	106933960	106933960	0.003534167585484	1	0.0316723329611001	1	-0.0768617962530951
chr2	1886086	1886127	0.0229199278472378	1	0.0316731173439333	1	0.0236483404431151
chr8	49493865	49494173	0.00508489244673322	1	0.0317162583997597	1	0.0429842452489096
chr16	3210066	3210357	0.0229756190283954	1	0.0317214876186477	1	0.0153431600318522
chr1	202430474	202430474	0.0035697262739227	1	0.0317967883706355	1	-0.0414960035514345
chr7	27186993	27187269	0.0231249132276491	1	0.031879671490011	1	0.0325770418626355
chr17	7493453	7493710	0.023137201892036	1	0.0318961435295083	1	0.0213265738573621
chr3	147127010	147127097	0.0231871409324168	1	0.0319510503278328	1	-0.0280111510515824
chr16	31469562	31469821	0.00518869244166087	1	0.0319586326952205	1	-0.0230669904725211
chr9	16310537	16310954	0.0051920914339381	1	0.0319677838282745	1	-0.0328582484507702
chr5	180258154	180258265	0.00520254987171419	1	0.0319994206025472	1	-0.0133382632077784
chr19	50706723	50706737	0.00522085213782234	1	0.0320321032205975	1	0.0173262832537248
chr14	29254530	29254680	0.00525170452926179	1	0.0321042664412525	1	-0.0345088985558787
chr1	225964856	225964937	0.00527366724859158	1	0.03214034805158	1	-0.040942492616122
chr4	17710911	17711202	0.0233832366407184	1	0.0321487148018008	1	-0.0191783897023914
chr5	38845028	38845129	0.00528020377220163	1	0.0321534210988001	1	-0.0316453005720139
chr19	56904901	56904945	0.00528647883486728	1	0.0321641409975206	1	0.0129455431325601
chr15	76627594	76627788	0.0234506935643742	1	0.0322135571160126	1	0.0158135416207379
chr8	23571706	23571740	0.0234731792055928	1	0.032235258374398	1	0.029305672085813
chr11	8038043	8038523	0.0235343610665829	1	0.0322985319229433	1	0.0165512776996856
chr8	35613299	35613299	0.00371248394956628	1	0.0323204946422731	1	-0.0630560705652093
chr1	14926373	14926373	0.00371379125428829	1	0.0323270311658831	1	0.0742017158324876
chr8	49468688	49468828	0.0236156754202919	1	0.03238742864404	1	0.0322938192265391
chr13	88329680	88330200	0.0236326703816781	1	0.0324112215899806	1	-0.0260368041901129
chr1	204950701	204951031	0.00541250301006912	1	0.0324425969033089	1	0.0494240924983533
chr21	33034963	33034963	0.00375065724744899	1	0.0324499178097521	1	0.079852550683059
chr5	25190672	25191097	0.0054344657293989	1	0.0324909671780233	1	-0.0356777400444255
chr6	168859941	168859997	0.0237113701259431	1	0.0325003797720217	1	-0.0190399974137317
chr21	39627840	39627877	0.00543917202639814	1	0.0325019485376882	1	0.0408659473498478
chr11	55797626	55797628	0.00544936900322983	1	0.0325194664209631	1	-0.0291564519329393
chr3	132756721	132756867	0.0237634008538792	1	0.0325581626407346	1	-0.0112193018012076
chr14	96343016	96343119	0.00547133172255961	1	0.0325751576021208	1	-0.0177367058755839
chr19	55668066	55668232	0.00547211610539282	1	0.0325775107506204	1	0.0274985598871113
chr1	152729200	152729200	0.00379458268610855	1	0.0325858775008412	1	0.0840933017483947
chr10	23633326	23633518	0.0237911157139858	1	0.0325869233446189	1	-0.0169309494754331
chr12	5018984	5019017	0.0238290275509241	1	0.0326264039472236	1	-0.0168408014726427
chr2	28114349	28114462	0.0239283827097969	1	0.0327333414734841	1	0.0181734442469464
chr16	49833847	49833847	0.00383981542949013	1	0.0327411853018161	1	0.0804661857478574
chr2	3753297	3753297	0.00384269149987855	1	0.0327474603644818	1	-0.0269250262801821
chr10	134045578	134045913	0.023966817468624	1	0.0327777898340324	1	0.0280601612741924
chr12	130567971	130567996	0.00557487025654286	1	0.0328005369361954	1	0.0255667839538303
chr4	189203762	189203965	0.0239940094068419	1	0.0328070734598055	1	0.0195379086164424
chr10	71813286	71813353	0.00558402138959694	1	0.03282040796797	1	-0.0236497770322047
chr18	8659509	8659650	0.0240282607905585	1	0.032845769679577	1	-0.0160426592355268
chr6	168963504	168963731	0.0056151352419808	1	0.0328881263525702	1	-0.0184340034849684
chr12	52976095	52976095	0.00389498368875898	1	0.0329268225723417	1	0.0616728555543672
chr6	12957651	12957800	0.0241255242618761	1	0.0329500925963935	1	-0.0109115488584182
chr13	51417469	51417846	0.0241519318172608	1	0.0329785918393333	1	0.00444097446107999
chr7	31126479	31126531	0.0241550693485936	1	0.0329822522925549	1	0.0271944374759214
chr11	68773204	68773448	0.0242193887409165	1	0.0330523238256547	1	-0.0145413960942381
chr14	94849703	94849747	0.00569749543946748	1	0.0330659197947636	1	0.0329678442021153
chr19	50706387	50706536	0.024275602843963	1	0.0331174276008108	1	0.0120278587469521
chr17	70636625	70636625	0.00395407386219387	1	0.0331268401948093	1	0.0371458447383352
chr9	93564339	93564603	0.0243446285332852	1	0.0331966502669647	1	-0.013526806185504
chr3	16554466	16554619	0.00577488787901052	1	0.0332397913227911	1	0.0348609632660608
chr16	31120226	31120649	0.0244055489333309	1	0.0332633228077872	1	0.0161524075862723
chr8	131265658	131265658	0.00401682448885039	1	0.0333231973640553	1	-0.0523470091570494
chr2	133427427	133427813	0.0245185000613126	1	0.0333984981160432	1	0.0172209462179324
chr10	79996622	79997038	0.00587659618638296	1	0.0334534049143676	1	0.0552503897942105
chr2	80531597	80531633	0.0245809892270247	1	0.0334680467272541	1	-0.020481176624175
chr19	38345819	38346023	0.00588496293660383	1	0.033469876953865	1	-0.0153065914206764
chr1	7018949	7018949	0.00406467184167599	1	0.0334892250637507	1	0.0825050753111682
chr11	134373627	134373655	0.00590012767137915	1	0.0335009908062488	1	0.0486438967216988
chr19	51869680	51869687	0.00590221935893437	1	0.0335090960955253	1	0.0185556815766467
chr7	150020269	150020751	0.0246379877129044	1	0.0335331505024103	1	-0.00787696309223135
chr17	29150100	29150100	0.0041268995464437	1	0.0337151273197142	1	0.0728853796311612
chr13	36706433	36706701	0.00601203295558328	1	0.0337289847497675	1	0.03761435006285
chr3	169386691	169387139	0.0248424501714269	1	0.0337682038914278	1	-0.0229398232155636
chr10	60936626	60936801	0.0248565690624246	1	0.033786506157536	1	-0.0129738202902023
chr5	103820591	103820591	0.00415409148466152	1	0.0337982719000341	1	-0.0528378662347182
chr2	144703795	144703795	0.00415487586749473	1	0.0338014094313669	1	-0.0420204206272032
chr1	33631017	33631052	0.00605386670668762	1	0.0338160512442534	1	0.0262845173207648
chr5	80597718	80597828	0.00607138458996257	1	0.0338518713936365	1	0.0170215465039286
chr13	25337690	25338135	0.0249370990333004	1	0.0338785404099655	1	0.0087274451187932
chr2	177012706	177013071	0.00608968685607072	1	0.0338861227773532	1	0.032517754645486
chr1	3446295	3446295	0.00419226478254424	1	0.0339496577868429	1	0.0752680581990537
chr13	114305226	114305746	0.0249964506676797	1	0.0339538411619534	1	-0.00964766173692677
chr12	52938023	52938420	0.00612759869300903	1	0.0339629922950074	1	0.0407197358300295
chr10	3724497	3724557	0.00613701128700751	1	0.0339833862486708	1	0.0290548298593803
chr2	8500033	8500179	0.00614380927156196	1	0.0339995968272237	1	0.0346632894323685
chr8	144153180	144153190	0.00614537803722838	1	0.0340040416632786	1	-0.032019570478534
chr8	700220	700659	0.0250495272393934	1	0.0340173761714431	1	0.0258832246164773
chr7	2742371	2742484	0.0251120164051055	1	0.0340877091654873	1	0.028193312849902
chr5	14380323	14380529	0.0251151539364383	1	0.0340908466968201	1	0.00952435776262073
chr5	169483131	169483281	0.00620394528877446	1	0.0341423545028673	1	0.0398465780007264
chr12	16759531	16759571	0.0251632627502083	1	0.0341462764170333	1	-0.012529041356686
chr14	40686259	40686341	0.00623584352399153	1	0.0342213157080768	1	0.0389138247344967
chr8	59058254	59058585	0.025241701033529	1	0.0342432784274065	1	-0.0228649237949842
chr2	218898511	218898788	0.0252560813854711	1	0.0342613192325703	1	0.0328351513752075
chr16	49670999	49670999	0.00429345016802788	1	0.0342696859827912	1	0.0415204488349209
chr11	75273068	75273187	0.00625623747765489	1	0.0342743922797904	1	-0.0301803592750551
chr7	70597778	70598282	0.0252882410816326	1	0.0342963549991202	1	0.0232582503232914
chr1	23668691	23668792	0.00628029188453989	1	0.0343198864841164	1	0.0286632783325654
chr10	839609	839609	0.00432900885646657	1	0.0343902194781606	1	-0.0296558916180047
chr5	72593606	72593933	0.0253758304980073	1	0.0343951872361042	1	-0.0172073309966453
chr7	2740160	2740362	0.0253928254593934	1	0.0344106134318239	1	0.0230050432220651
chr8	8761750	8761750	0.00434025167707586	1	0.0344281313150989	1	-0.0209004233971154
chr5	180258762	180258852	0.0254247236946105	1	0.0344487867297066	1	-0.0157008297855026
chr7	138147038	138147038	0.00435044865390755	1	0.0344597680893715	1	0.0454044644322976
chr6	34662875	34663155	0.00636343646485978	1	0.0345097071297523	1	0.0336676492123619
chr6	168122755	168122879	0.00637311051980266	1	0.0345324542319153	1	0.0336631115149355
chr10	103599520	103599700	0.0255180652517621	1	0.0345583388654111	1	0.00894139144107445
chr2	120189867	120190202	0.0255593760809776	1	0.0346098466714584	1	-0.0218107012872261
chr5	2006984	2007128	0.00642357248207228	1	0.0346302406251217	1	0.04317400936025
chr21	22369485	22369908	0.0255753251985861	1	0.0346307635470105	1	-0.0250156366467515
chr22	38071591	38071607	0.0256182047934681	1	0.0346825328140022	1	0.0127379755584572
chr19	8595087	8595384	0.0256268330046334	1	0.0346916839470563	1	-0.0105877599845119
chr8	48172764	48172992	0.0256362455986318	1	0.0347063257599428	1	-0.0165161027233092
chr12	1905735	1906097	0.00651900572677907	1	0.0348344416226998	1	-0.0234927476764289
chr16	22825158	22825282	0.00652109741433428	1	0.0348415010681987	1	-0.0232194186021232
chr2	11679605	11679845	0.00652580371133352	1	0.034850129279364	1	0.0512486993523491
chr2	3699334	3699563	0.0258069795953264	1	0.0349066048433548	1	0.0225966348038423
chr11	14201330	14201330	0.00449346779049553	1	0.0349272602579626	1	0.0809572392758431
chr2	54342651	54342806	0.00659326063498928	1	0.0349913181893411	1	-0.0163354718168748
chr14	106941205	106941205	0.00453111816648944	1	0.035042564534444	1	-0.0713409261189027
chr4	174451455	174451460	0.00663352562042721	1	0.0350728940039946	1	-0.0275467393984986
chr6	168896207	168896316	0.0259902637173524	1	0.0351471489122048	1	-0.0115000801947144
chr19	49828347	49828629	0.0260035982255169	1	0.0351615292641469	1	-0.0139794256910318
chr2	145202065	145202065	0.00457164461287177	1	0.0351756481551447	1	-0.0709733876894723
chr11	364805	364809	0.00668790949686286	1	0.0351957806478636	1	0.0389443438328791
chr10	44501131	44501318	0.0260470007422876	1	0.035214867296805	1	0.0332929215268422
chr6	47202254	47202394	0.00670725760674862	1	0.0352316007972467	1	0.0210215564589703
chr3	16650168	16650168	0.00459543755881237	1	0.0352572239697981	1	-0.064394256271174
chr4	113276997	113277063	0.00673418808402204	1	0.0352802325329055	1	-0.0297468245219639
chr7	20865522	20865639	0.00674177045140971	1	0.0352938285020144	1	-0.0147805967238372
chr9	138370703	138370739	0.0067535361939078	1	0.0353181443698438	1	0.0280135102485382
chr4	85414135	85414194	0.026139557916606	1	0.0353427216986176	1	-0.0178965119598493
chr2	115919009	115919366	0.00676843946773873	1	0.035344290464284	1	-0.023757333653765
chr6	108497717	108497734	0.00677053115529394	1	0.0353471665346725	1	0.0223612597879995
chr1	45452580	45453003	0.0261500163543821	1	0.0353513499097829	1	-0.0172798269256387
chr12	130637449	130637557	0.00677366868662677	1	0.0353563176677265	1	0.0330328162393322
chr2	100937072	100937505	0.00678046667118123	1	0.0353699136368355	1	0.0471804930875228
chr6	72595944	72596135	0.00678177397590324	1	0.0353735740900571	1	0.0210618732157615
chr12	48397055	48397568	0.0262036158479845	1	0.0354169766068278	1	-0.0133787053423524
chr3	53032818	53032988	0.0262211337312595	1	0.0354363247167136	1	0.0120323864321403
chr1	239549626	239549798	0.00681916289095275	1	0.0354452143888233	1	-0.0152542498836378
chr4	1580172	1580377	0.0262828385141384	1	0.0355179005313671	1	0.033655011835913
chr20	44806406	44806780	0.0263772259150676	1	0.03563032873746	1	0.030022725613951
chr14	105622312	105622454	0.00691982535454758	1	0.0356363423391813	1	0.0400267331651351
chr15	93617141	93617168	0.0264496505966669	1	0.0357262849040556	1	-0.0148892040301938
chr10	60935663	60935910	0.00697603945759404	1	0.0357443257092194	1	-0.0217335920679928
chr1	18806517	18806854	0.0264713518550523	1	0.0357539997641622	1	0.0289657898964595
chr1	208962374	208962374	0.00474786928939883	1	0.0357704718036596	1	0.0790783351778878
chr1	79472361	79472408	0.0070076762318667	1	0.0358010627341546	1	-0.0290540325368951
chr3	42304966	42305186	0.0265011584027142	1	0.0358031544217098	1	0.0342468264884423
chr8	54605566	54605788	0.0265139699889899	1	0.0358198879221516	1	-0.0290469653046522
chr8	4183642	4183726	0.00702127220097562	1	0.0358256400629284	1	0.0472315391066503
chr2	144992352	144992352	0.00478918011861437	1	0.035894927213195	1	-0.0443061129257373
chr3	43020791	43020846	0.0265767206156464	1	0.0358951886741394	1	-0.00511591380626786
chr3	10436278	10436325	0.0266154168354179	1	0.0359398984956322	1	0.0281281507815956
chr14	99506767	99507062	0.00709474272635262	1	0.0359639529025172	1	0.0437428190732281
chr17	9859123	9859123	0.00481271160361057	1	0.0359762415669041	1	0.0588010865331098
chr20	21685401	21685834	0.00711043038301675	1	0.035995066754901	1	0.0446300420578876
chr7	150102721	150102724	0.00713265456329094	1	0.0360389921935606	1	0.0206863137954933
chr3	126237319	126237462	0.0267103271582359	1	0.0360669685146116	1	0.0288961474780013
chr12	128364721	128364739	0.0071525255950655	1	0.0360787342571097	1	0.033024352654968
chr12	132976866	132977140	0.0267419639325086	1	0.0361108939532712	1	0.0186230755092845
chr3	114343673	114343825	0.0267427483153418	1	0.0361132471017708	1	-0.0193598499951386
chr3	85008587	85008786	0.0267636651908939	1	0.0361498516339871	1	-0.0275029869194473
chr19	55692003	55692397	0.00720194171355751	1	0.0361705070485949	1	-0.0211115501831214
chr12	130647580	130647874	0.00720586362772354	1	0.0361833186348706	1	0.0177319587653462
chr1	3229739	3230250	0.0268041916372763	1	0.0361982219087015	1	-0.0142403580644737
chr20	59542578	59542589	0.00721893667494365	1	0.0362105105730884	1	0.0414723187690883
chr19	49838101	49838698	0.026820925137718	1	0.0362183544014205	1	-0.0140763440637689
chr13	61989037	61989412	0.0268266772784949	1	0.0362264596906969	1	-0.0182910278718996
chr1	190068053	190068180	0.0269163583824248	1	0.0363462088032331	1	-0.0144106425896752
chr22	26137997	26138429	0.0269174042262024	1	0.0363472546470107	1	0.0209858499128126
chr2	237678157	237678157	0.00494501084147806	1	0.0363684329835073	1	0.0778342155514368
chr20	33103246	33103584	0.0269341377266442	1	0.0363741851242842	1	-0.0131808121979371
chr10	80303482	80303482	0.00495390051358773	1	0.0363943176170031	1	0.0827692318313346
chr6	31024990	31025014	0.0073214293651493	1	0.0364100052736673	1	0.0349762580982224
chr5	172753646	172753741	0.00737241424930772	1	0.0364952415415424	1	0.0294564390256309
chr1	161368787	161368947	0.00737685908536255	1	0.0365038697527076	1	-0.0335525197447726
chr1	47697429	47697496	0.0270510107687919	1	0.0365279241595926	1	0.0129274320264693
chr8	49823433	49823497	0.00739202382013788	1	0.0365383825973687	1	0.0377931583935947
chr1	3632713	3632713	0.00499756449130289	1	0.0365420430505903	1	0.0791996112845128
chr8	2877217	2877217	0.00501429799174463	1	0.036597734231748	1	0.0737261101132671
chr1	5793761	5793847	0.00743804094635266	1	0.0366186511073002	1	0.0342369453871476
chr1	204485075	204485087	0.0074555588296276	1	0.0366481961940176	1	-0.0468445388330336
chr2	98262341	98262341	0.0050344304844636	1	0.0366602233974601	1	0.0475633650879001
chr1	159750831	159751259	0.0271451367087767	1	0.0366633609287929	1	0.011810034936051
chr6	13976724	13977251	0.027181741240993	1	0.036715391656729	1	0.0215448036565413
chr11	115531033	115531299	0.0272348178127066	1	0.0367883392602172	1	0.0350955557494053
chr4	108641437	108641439	0.00753818048805869	1	0.0367993206198821	1	-0.0162212536614384
chr5	140855547	140855582	0.027283188087421	1	0.0368547503400953	1	0.00531603390776646
chr2	198650752	198650985	0.0273349573544127	1	0.0369253447950839	1	-0.0161429789242447
chr14	94944009	94944009	0.00511600629911707	1	0.0369297896311387	1	0.0484388357487796
chr1	228291668	228291705	0.0273833276291271	1	0.0369894027264624	1	0.00867355318515828
chr13	112255528	112255534	0.00766289735853852	1	0.0370192092741243	1	-0.0259807262271374
chr3	57999988	57999988	0.00515365667511098	1	0.0370291447900116	1	0.0577313144363827
chr6	168063188	168063253	0.00766943388214857	1	0.0370330667041776	1	0.0320021761649063
chr1	36184400	36184717	0.00767440164009221	1	0.0370424792981761	1	0.00985474448870993
chr1	57293848	57294085	0.00767753917142504	1	0.0370479699780085	1	0.0339776359722656
chr10	12085598	12085641	0.00772068022725139	1	0.0371368666991053	1	-0.0401512901633727
chr8	142431437	142431473	0.00772355629763982	1	0.0371405271523269	1	0.0388345784831416
chr1	75590960	75591353	0.0275145810232169	1	0.0371703336999887	1	-0.0101339551321755
chr12	97957406	97957454	0.00777297241613183	1	0.0372315155609788	1	0.0364330959242017
chr4	3746818	3746931	0.0276317155263091	1	0.0373253800400192	1	0.0159785231056042
chr1	179555635	179555658	0.00782735629256748	1	0.0373381916262949	1	0.0119399248577627
chr18	33530184	33530342	0.00784435125395362	1	0.0373679981739568	1	0.0174695137924784
chr11	70672858	70672878	0.0276772097306351	1	0.0373857775181761	1	0.0130008433295804
chr2	946010	946127	0.00786343790289497	1	0.0374051256280619	1	0.0227591862016768
chr8	145106299	145106582	0.0276976036842985	1	0.037418198675282	1	-0.0202664437068022
chr9	98585586	98585586	0.00527654331898	1	0.0374427760040558	1	0.061382911911236
chr7	157209551	157209551	0.00530974885891907	1	0.037542392623873	1	0.0508608310332512
chr14	106856864	106857477	0.0278024495230037	1	0.0375646168041472	1	0.0273757450394295
chr3	42947263	42947385	0.0278521271024401	1	0.037633381032525	1	-0.0237312674678277
chr16	31548640	31549141	0.02788716286899	1	0.0376791366977953	1	-0.0219708921981873
chr2	63276700	63276723	0.0278981442286549	1	0.0376961316591815	1	-0.0183369748099322
chr22	17591088	17591088	0.00536805464952076	1	0.0377256767458989	1	0.0278109806675912
chr1	1067099	1067223	0.027936578987482	1	0.03775365306695	1	0.0217925558374702
chr1	181454164	181454164	0.00538949444696173	1	0.0377918263648327	1	0.078375902682831
chr15	23892574	23892770	0.0279990681531942	1	0.0378396737176583	1	0.0254570071708533
chr10	80725166	80725361	0.00812411446446393	1	0.0378747094842082	1	0.035390524034393
chr12	132862944	132863109	0.0280560666390738	1	0.037927263134033	1	0.0113094875645086
chr1	5677939	5677939	0.00543054381523287	1	0.0379280475168662	1	0.0565973524050623
chr17	43506829	43507018	0.00816620967651268	1	0.0379602072130277	1	-0.0258576955513239
chr6	50787803	50788414	0.02812117041423	1	0.0380198203083513	1	-0.0247859181739855
chr2	24715094	24715213	0.00821457995122708	1	0.0380404757229591	1	0.0234159687848773
chr5	5652693	5652728	0.00823758851433447	1	0.038078126098953	1	0.0343195214963561
chr22	43793555	43793802	0.00824621672549974	1	0.0380914606071175	1	0.0365650500109916
chr15	23891189	23891780	0.0281813064314425	1	0.0381068868028373	1	0.029222898477686
chr10	125806958	125807047	0.00827105551521794	1	0.0381291109831115	1	0.0299945603212601
chr1	153015281	153015281	0.00550192265305466	1	0.0381583946088845	1	0.0746597085939754
chr19	55627728	55627738	0.0082906650860481	1	0.038166499898161	1	0.0255526769318917
chr17	9728972	9729235	0.0282688958478172	1	0.0382350026655943	1	0.0288540432591002
chr6	29691245	29691250	0.0083505396423162	1	0.0382804968699203	1	0.0213578267480185
chr12	119771135	119771257	0.00835812200970386	1	0.0382886021591968	1	0.0393394103605651
chr2	133178190	133178190	0.00554715539643624	1	0.0382964459875288	1	-0.0629724569906046
chr6	10421372	10421670	0.0283368756933617	1	0.0383422016527992	1	0.0187867662286689
chr11	14913297	14913424	0.0283489028968042	1	0.0383649487549622	1	-0.0273970720262611
chr6	40310514	40310514	0.00558559015526335	1	0.0384088741936218	1	0.0715756175160626
chr14	29236034	29236221	0.00844022074624614	1	0.0384253462331191	1	-0.0304773355155011
chr6	40298217	40298217	0.0055916037569846	1	0.0384344973661732	1	0.0707737013754294
chr16	57290525	57290525	0.00559212667887341	1	0.0384358046708952	1	0.0662447191689681
chr17	33914403	33914403	0.00559997050720547	1	0.0384635195310018	1	-0.0411395710989303
chr2	227663034	227663151	0.00846218346557592	1	0.0384734550468891	1	0.0320779521784156
chr10	50010141	50010529	0.00848022427073967	1	0.038509798118161	1	0.0446651276708487
chr17	72244469	72244690	0.00851630588106717	1	0.0385730716667063	1	0.0432915216091431
chr9	138904715	138904964	0.00852885600639847	1	0.0385963416907581	1	0.0676927632878573
chr5	139488623	139488731	0.00854794265533983	1	0.0386258867774756	1	0.0283703665387713
chr16	11001757	11001871	0.0285206827372765	1	0.0386285013869196	1	0.0173022454409141
chr1	152958102	152958102	0.00565696899308514	1	0.0386368681371404	1	0.0738727494167681
chr4	188256637	188256765	0.0285468288317167	1	0.0386724268255791	1	0.0366518237014181
chr1	167095593	167095747	0.00857513459355765	1	0.0386758258178564	1	-0.0218358708025295
chr14	95058788	95058788	0.00568259216563655	1	0.0387210585612379	1	0.0741402274051571
chr10	79929586	79929586	0.00568677554074699	1	0.0387336086865692	1	0.0844332260808471
chr12	115948398	115948398	0.00568886722830221	1	0.0387390993664017	1	0.0552549812631725
chr2	237381593	237381593	0.00570455488496634	1	0.0387845935707277	1	0.087726840001994
chr2	27498285	27498334	0.0286417391545347	1	0.0388193678763332	1	-0.0110415080463215
chr10	88854610	88854610	0.00572677906524052	1	0.0388528348772166	1	-0.0140852779806479
chr1	111683801	111683960	0.00869436078420504	1	0.0388842101905449	1	0.0252590232334282
chr21	31709690	31709690	0.00576495236312323	1	0.0389817351228069	1	-0.0578047185281701
chr8	2916814	2916814	0.00576495236312323	1	0.0389833038884733	1	0.0615172705689773
chr1	52082593	52082593	0.00577488787901052	1	0.0390078812172471	1	-0.0303682052731807
chr12	10325221	10325287	0.0087989451619659	1	0.0390724620705145	1	0.0372485408117817
chr5	92414263	92414398	0.00880548168557596	1	0.0390899799537894	1	-0.0258648534288057
chr8	104512168	104512317	0.00882430687357291	1	0.0391184791967292	1	-0.0224669191675929
chr4	155664954	155664998	0.0288383577847251	1	0.0391409648379478	1	-0.0241365899406673
chr16	87110129	87110195	0.00884234767873666	1	0.0391433179864474	1	0.0365194539136575
chr1	228401186	228401278	0.00884260913968106	1	0.039144363830225	1	0.0108587423263901
chr15	85360655	85360691	0.0288414953160579	1	0.0391448867521138	1	-0.0123685793113697
chr20	57463711	57463725	0.0288425411598355	1	0.0391469784396691	1	0.00594918502480668
chr6	10720455	10720630	0.00884757689762471	1	0.0391545608070567	1	-0.0463489302051665
chr7	19146032	19146255	0.00885254465556835	1	0.0391610973306668	1	0.0143224945660512
chr6	28565403	28565626	0.00888653457834063	1	0.0392220177307125	1	0.0131199394243273
chr10	80523167	80523167	0.00585515638894198	1	0.0392225406526013	1	0.0831347180762246
chr14	90724229	90724250	0.00890535976633758	1	0.0392523472002631	1	0.0223425746593346
chr3	114862175	114862175	0.0058815639443266	1	0.039314051983142	1	-0.0431622707661814
chr8	27183097	27183097	0.00588862338982546	1	0.0393292167179174	1	0.0269867403285485
chr12	130529394	130529514	0.00896994061960492	1	0.0393694817033553	1	0.0225240585921994
chr12	107974897	107975299	0.0089796146745478	1	0.0393888298132411	1	0.0321214548352038
chr8	49470468	49470964	0.00898301366682503	1	0.0393956277977955	1	0.0393391840673601
chr14	76565523	76565763	0.00898458243249144	1	0.0393977194853507	1	0.0447681324836675
chr2	38301438	38301756	0.00898667412004665	1	0.0394003340947948	1	-0.0454470014477116
chr14	95513854	95513955	0.0089916418779903	1	0.039407655001238	1	0.042158100044722
chr6	32294260	32294503	0.029001509414032	1	0.0394084393840712	1	0.0291104080279913
chr20	37230386	37230413	0.0290294857350831	1	0.039454456510286	1	0.0115853064195121
chr15	93128681	93128777	0.0290472650793024	1	0.0394868776673919	1	0.0246373995338641
chr2	9340871	9340871	0.00594588333664953	1	0.0394876620502251	1	-0.0638255403290867
chr13	25875020	25875133	0.0090648509424229	1	0.0395313260279402	1	-0.0445732875403669
chr12	1702001	1702116	0.00906798847375573	1	0.0395360323249395	1	0.0269247585833515
chr5	140344290	140344620	0.0291128917763474	1	0.0395922464279859	1	-0.0134852911343851
chr15	100874800	100874864	0.0091132212171373	1	0.0396144706082601	1	-0.0197196801786306
chr12	108169020	108169333	0.00913806000685551	1	0.0396450615387552	1	-0.0208239477003963
chr12	132913161	132913161	0.0060028818225292	1	0.0396531668280316	1	0.0538014339319139
chr6	168928303	168928348	0.00916054564807409	1	0.0396858494460819	1	-0.0134130938154872
chr2	11621399	11622001	0.029190022754946	1	0.0397347426426851	1	0.0315649548476168
chr11	46864195	46864195	0.00605020625346599	1	0.0398003693397301	1	0.0454245425008308
chr3	39093076	39093212	0.00924133707989436	1	0.0398142267697834	1	-0.035545616589327
chr14	99413386	99413386	0.00606066469124208	1	0.0398239008247263	1	0.0577834426194177
chr19	50312505	50312544	0.00924865798633762	1	0.0398280841998367	1	0.0203415103861886
chr1	152657198	152657198	0.00606929290240735	1	0.0398482166925557	1	0.0721104581509666
chr1	151104750	151105049	0.00927558846361104	1	0.0398688721071634	1	-0.0318040390680984
chr21	45078342	45078421	0.0292925154451516	1	0.0399117517020454	1	-0.0158722215054034
chr22	50007440	50007725	0.00931219299582734	1	0.0399256091320987	1	-0.0279286708511421
chr22	40060836	40060891	0.00932108266793702	1	0.0399423426325404	1	0.0152149232584464
chr9	116840435	116840825	0.00932788065249147	1	0.0399522781484277	1	0.0337115486633834
chr12	115671392	115671392	0.00610668181745686	1	0.0399640438909258	1	0.0683801699868257
chr16	967929	968024	0.0293432388683657	1	0.0399933275166989	1	0.0283681822558467
chr17	59534637	59534847	0.0293479451653649	1	0.0400024786497529	1	0.0352399878122345
chr8	11839764	11839844	0.0293531743842529	1	0.0400134600094178	1	0.022278823833572
chr12	72665771	72665880	0.00937154463020664	1	0.0400233955253051	1	-0.0232977183490219
chr15	45670526	45670872	0.0293793204786932	1	0.040053202072967	1	-0.0150628679791032
chr17	22194163	22194163	0.00613858005267392	1	0.040058431291855	1	-0.0490618497585543
chr3	105087206	105087718	0.0294093884872994	1	0.0400994806601261	1	0.0231889113274666
chr19	14016717	14016729	0.00944789122597207	1	0.0401468050910629	1	-0.0306184730562265
chr5	131281112	131281290	0.00951796275907184	1	0.0402791043289304	1	-0.0205390122122259
chr8	49292285	49292685	0.0295246927637808	1	0.0402887783838733	1	0.0278074321158021
chr2	145129279	145129279	0.00623427475832511	1	0.0403353184319769	1	-0.0489253872768269
chr1	14847711	14847711	0.00624996241498924	1	0.0403784594878032	1	0.0773487521422384
chr1	152759772	152759772	0.00626146669654294	1	0.0404148025590751	1	0.0781926951030283
chr4	7106023	7106195	0.00959796980805891	1	0.0404200317779632	1	0.0360413707669003
chr10	121296010	121296042	0.00964477131710689	1	0.0404919335376738	1	0.0450742567213048
chr7	95026095	95026097	0.00969627912315412	1	0.0405682801334392	1	-0.015278335102608
chr11	63529891	63530432	0.0296839224789217	1	0.040588935548047	1	0.0152487196922289
chr9	98113462	98113543	0.00971144385792944	1	0.040591550157491	1	0.0320101570062076
chr6	32633102	32633102	0.00632055686997783	1	0.0405946876888238	1	-0.0501284763226786
chr5	83678903	83679123	0.0296873214711989	1	0.0405962564544902	1	0.0214759028688921
chr16	10133433	10133466	0.00972582420987156	1	0.0406106368064324	1	0.0111786217008067
chr1	18767776	18767776	0.00633781329230837	1	0.040644888190149	1	0.056071215582734
chr1	160389175	160389374	0.0297430126523566	1	0.0406927355429746	1	0.0357155699089462
chr8	125985757	125985883	0.0297430126523566	1	0.0406945657695855	1	-0.0252593418052853
chr11	116661100	116661388	0.0297566086214655	1	0.0407201889421369	1	-0.00876567188302901
chr8	10262159	10262628	0.0297942589974594	1	0.0407926136237363	1	0.0342639019194715
chr11	111250201	111250338	0.0298177904824556	1	0.040836016140507	1	0.0256382598653778
chr3	57581113	57581393	0.00990675518339786	1	0.0409021657594408	1	0.0246024239214057
chr4	146823969	146823969	0.00643141631040434	1	0.040908179361162	1	0.0543873018053223
chr5	163662391	163662391	0.00644945711556809	1	0.0409521047998216	1	0.0448971058657281
chr17	7341616	7341641	0.00995041916111302	1	0.0409748519019846	1	0.0344354823130801
chr3	129346101	129346288	0.0299066872035523	1	0.0410012594573692	1	-0.0102021645613513
chr19	2888943	2889256	0.0299958453855934	1	0.0411631037819541	1	0.0107778777195332
chr22	34318327	34318614	0.0100701682736492	1	0.0411704246883974	1	0.00750969960841241
chr16	49411456	49411456	0.00653312461777678	1	0.0411947405562268	1	0.0805892887306009
chr14	94750291	94750291	0.00654645912594129	1	0.0412284690180547	1	0.0866938105890597
chr10	129785464	129785537	0.0101198458530856	1	0.04124363375283	1	0.0405056653191221
chr1	152955080	152955543	0.0101352720488053	1	0.0412658579331042	1	0.0296887086974781
chr10	80615772	80615772	0.00656528431393825	1	0.0412804997459907	1	0.0752082121800829
chr19	47617189	47617189	0.00657626567360314	1	0.0413110906764857	1	0.0228070325703125
chr4	165304531	165304842	0.0300886640208562	1	0.0413419430679252	1	-0.0157519648178852
chr12	5153729	5153947	0.0102639108334512	1	0.0414755496105147	1	0.0373768269526001
chr22	45132934	45133246	0.0301650106166216	1	0.0415032644706213	1	0.0226431356171499
chr11	27015813	27015991	0.0301705012964541	1	0.041514768752175	1	-0.0156669247213581
chr3	15107106	15107309	0.0102853506308922	1	0.0415173833616191	1	-0.0300073965190518
chr2	172974014	172974217	0.0301739002887313	1	0.0415215667367295	1	-0.0176790815710127
chr12	52828840	52829316	0.0103182947098869	1	0.0415733360037211	1	0.0419643492712767
chr5	171616388	171616574	0.0302162569617245	1	0.041608371770271	1	-0.014704141669151
chr2	85554079	85554513	0.0302288070870558	1	0.041631118872434	1	0.0175270527112482
chr9	116662447	116662447	0.0066928772548065	1	0.0416313803333784	1	0.074541424559876
chr7	109585055	109585055	0.00669967523936096	1	0.0416559576621522	1	-0.0578741676076632
chr1	152780139	152780139	0.00670621176297101	1	0.0416690307093723	1	0.0677089677662899
chr7	56605828	56605835	0.0302648886973833	1	0.0416983143351453	1	0.00914809895498556
chr14	105864430	105864488	0.0303111672845425	1	0.0418049904004614	1	-0.0124056165481581
chr16	85747424	85747424	0.00677915936645921	1	0.041871662941284	1	-0.0365550002289624
chr8	2883914	2883914	0.00679850747634497	1	0.041922386364498	1	0.0706972786513361
chr6	169631139	169631196	0.0304167975060809	1	0.0420131133122055	1	0.0158265647753667
chr8	144824631	144824658	0.0304303934751898	1	0.0420460573912002	1	0.0221103900607017
chr11	107582734	107582818	0.0304450352880764	1	0.0420750795560289	1	-0.0181548194389622
chr12	52915036	52915064	0.0106846014929943	1	0.0421326009637973	1	0.0384970292912377
chr10	80735988	80735988	0.00688243643949807	1	0.0421600543629596	1	0.0669235952749808
chr10	134411480	134411480	0.00688452812705329	1	0.042166852347514	1	-0.0319691222226816
chr16	1992631	1992734	0.0107138851187673	1	0.0421710357226244	1	0.0353321576040548
chr10	50746568	50746589	0.0107303571582647	1	0.0421956130513983	1	-0.0244184575621206
chr2	237245421	237245446	0.0107661773076478	1	0.0422520886153891	1	0.0406296989197394
chr5	177751557	177751794	0.0107664387685922	1	0.0422526115372779	1	0.0295033066944255
chr22	50013649	50013649	0.00692191704210279	1	0.0422635928969428	1	-0.0475143688973889
chr2	145310966	145310966	0.0069221785030472	1	0.0422649002016648	1	-0.0626514866658652
chr3	196386877	196387058	0.0107912775583104	1	0.0422866014600502	1	-0.0162883222089757
chr22	50028390	50028456	0.0108388634501916	1	0.0423629480558156	1	-0.0263045910426911
chr11	28781311	28781311	0.00696061326187431	1	0.0423655626652597	1	-0.0676610759496496
chr1	153003198	153003198	0.00697786968420486	1	0.0424066120335308	1	0.0592182398112004
chr10	79399007	79399092	0.0108945546313492	1	0.0424552437691896	1	0.0257996395542216
chr1	3589862	3589971	0.0109055359910141	1	0.042478252332297	1	0.0462121255435048
chr3	147136904	147136922	0.0109131183584018	1	0.0424894951529063	1	-0.0432591528108934
chr7	143140164	143140416	0.0109507687343957	1	0.0425493697091744	1	0.00590495143170922
chr6	168844698	168844755	0.0109520760391177	1	0.0425509384748408	1	-0.0168724757611175
chr16	30133175	30133247	0.0110388810726592	1	0.0426727792749322	1	0.0319730899004431
chr15	22922243	22922301	0.0110563989559342	1	0.0426989253693724	1	0.0351095099875118
chr1	152879586	152879586	0.00708114675724371	1	0.0427031087444828	1	0.0706006851436319
chr2	30669597	30669759	0.011060843791989	1	0.0427054618929825	1	0.00742652053244597
chr1	152636074	152636074	0.00708742181990936	1	0.0427182734792582	1	0.0786541150534553
chr4	134070369	134070416	0.0307462382960276	1	0.0427245485419238	1	-0.0197185414912475
chr12	107348689	107348855	0.0307569581947481	1	0.0427527863239193	1	-0.0226070337379628
chr1	92683675	92683821	0.0110937878709837	1	0.0427598457694181	1	-0.0175020424535786
chr9	117880491	117880556	0.0110982327070385	1	0.0427648135273618	1	-0.0166613610343279
chr21	29910411	29910762	0.0111567999585846	1	0.0428479581076816	1	0.0295353155550807
chr7	109600591	109600733	0.0111910513423013	1	0.0429065253592277	1	-0.0206219075570775
chr1	228652478	228652528	0.0111910513423013	1	0.0429065253592277	1	0.0155128862252973
chr3	39851641	39851788	0.0112564165784018	1	0.0429975137678797	1	-0.0318572591519009
chr4	113444295	113444295	0.00719775833844707	1	0.0430069263618782	1	0.0345320532823861
chr16	20417044	20417094	0.0112823012118976	1	0.0430359485267068	1	0.0375449070891035
chr1	228403247	228403422	0.0309193254412219	1	0.0431237994040259	1	-0.00251778897470722
chr1	5483364	5483783	0.0113589092686075	1	0.0431502069594105	1	0.0230172437324155
chr2	205543309	205543309	0.0072618162698256	1	0.0431831510384052	1	0.0431969893828884
chr7	121946018	121946036	0.0113994357149898	1	0.0432085127500122	1	0.0172741469549302
chr3	49236810	49236810	0.00727122886382408	1	0.0432129575860671	1	-0.0279625987046621
chr21	35574324	35574541	0.0114464986849822	1	0.0432832905801112	1	0.000657923075121997
chr10	50123203	50123344	0.0114742135450888	1	0.0433243399483824	1	0.0406179124782667
chr12	119594454	119594454	0.00731881475570527	1	0.0433353213080473	1	0.0544537967890098
chr2	238322972	238323400	0.0114828417562541	1	0.0433355827689917	1	0.0373638802956696
chr1	201123745	201123745	0.00735463490508837	1	0.0434315389355873	1	-0.0385450113302319
chr11	35611044	35611044	0.0073588182801988	1	0.0434453963656406	1	0.0323844867378168
chr19	52206224	52206446	0.0310678352576423	1	0.0434804321321905	1	0.0248598791237914
chr14	97081208	97081655	0.031099472031915	1	0.0435494578215126	1	0.0234021539074634
chr2	219576383	219576539	0.0116279525803973	1	0.0435518109700123	1	0.00629741282754481
chr19	49646157	49646179	0.0116289984241749	1	0.0435528568137899	1	-0.0172355516726728
chr18	77905699	77905947	0.031104701250803	1	0.0435627923296771	1	-0.024502301165307
chr1	93425802	93425802	0.00741111046907924	1	0.0435735122283976	1	0.0660429161487589
chr12	133337036	133337116	0.0116457319246166	1	0.0435774341425637	1	0.0255031311100417
chr6	14282715	14282882	0.0311282327357992	1	0.0436145615966688	1	0.0245828518374666
chr18	31020418	31020418	0.00743882532918587	1	0.0436495973632187	1	-0.0483269190656614
chr8	1822186	1822568	0.0117678341856524	1	0.0437575807332568	1	-0.00810235507112811
chr11	13983851	13983893	0.0117683571075412	1	0.0437594109598676	1	0.03557100122934
chr8	8639450	8639926	0.0118230024449213	1	0.0438365419384662	1	-0.0407056355422586
chr9	135645219	135645761	0.0312325556526157	1	0.0438791600724038	1	-0.0143190591160562
chr1	154238265	154238265	0.00753556587861466	1	0.0438820361427922	1	0.0439786224460489
chr2	144053418	144053418	0.00754550139450195	1	0.0439055676277884	1	-0.060331133918018
chr8	12869602	12869615	0.0118967344312427	1	0.0439353741754502	1	0.0286187462896765
chr1	208774442	208774442	0.00756328073872129	1	0.0439492316055035	1	0.0670702428016552
chr4	1558451	1558628	0.0119126835488512	1	0.0439578598166688	1	0.0268457221476138
chr7	64338366	64338366	0.00757478502027499	1	0.0439795610750542	1	-0.0321925890366177
chr3	105178356	105178356	0.00759439459110515	1	0.0440297615763794	1	-0.0505038354236463
chr11	78052863	78052863	0.00761138955249129	1	0.0440744713978722	1	0.0334806588615323
chr17	77216953	77217025	0.0120078553326136	1	0.0440901590545363	1	0.0232767133596205
chr6	166666838	166667022	0.0120128230905573	1	0.0440980028828684	1	-0.0143536288262963
chr16	15982478	15982511	0.0313256357488228	1	0.0441100300863109	1	0.00718272758800621
chr5	20305818	20305935	0.0120222356845557	1	0.0441110759300885	1	-0.0387380067413051
chr2	51808957	51809023	0.0120224971455001	1	0.0441115988519773	1	-0.0401790038392933
chr11	123066179	123066252	0.0313366171084877	1	0.0441361761807511	1	-0.0111495922764471
chr17	22191976	22191979	0.0120559641463836	1	0.0441589232829141	1	0.0406558663422768
chr2	63275034	63275178	0.0313470755462638	1	0.0441659827284129	1	-0.0241358458478624
chr16	73099892	73099917	0.012073743490603	1	0.0441798401584663	1	0.0199640344007464
chr14	100680261	100680334	0.0120774039438246	1	0.0441832391507435	1	-0.0367973456530529
chr5	1849983	1850140	0.0120959676708771	1	0.0442096467061281	1	0.0291079776126398
chr1	18026187	18026284	0.0121038114992092	1	0.0442182749172934	1	0.0414646788210434
chr17	74865838	74865925	0.0121134855541521	1	0.0442313479645135	1	0.0182951045079234
chr13	112859362	112859484	0.0121440764846471	1	0.044270044184285	1	0.0161637820534676
chr2	50884252	50884693	0.0121605485241445	1	0.0442880849894487	1	0.0272056991322644
chr1	221510354	221510354	0.00769453413281118	1	0.0442988048881692	1	0.0737665422191029
chr7	134232463	134232463	0.00774630339980281	1	0.0444321499698143	1	-0.0622267439973137
chr19	47289410	47289611	0.0314506140802471	1	0.0444405167200352	1	0.0185778296031086
chr16	88166706	88166826	0.0122842195508467	1	0.0444507136968669	1	0.0310659656632181
chr13	52952113	52952319	0.0123022603560105	1	0.0444760754084739	1	-0.0365669993918341
chr1	161349006	161349116	0.0123064437311209	1	0.0444823504711395	1	0.015331667560036
chr1	226288408	226288430	0.0123336356693387	1	0.0445163403939118	1	-0.0232057092993213
chr9	842799	842914	0.0123467087165588	1	0.044533335355298	1	-0.0237504249318157
chr17	14936230	14936230	0.00778630692429634	1	0.0445375187304084	1	0.0502579539631437
chr3	55693741	55693880	0.0123759923423319	1	0.0445728159579027	1	-0.0256761300004453
chr20	9049273	9049361	0.0124081520384933	1	0.0446141267871182	1	-0.0182329992743993
chr1	61869782	61869782	0.00782631044878987	1	0.0446402728815585	1	-0.0354919907799458
chr6	150464990	150465049	0.012443710726932	1	0.0446664189759987	1	-0.0209021771155809
chr5	133560149	133560225	0.0124750860402603	1	0.044705638117659	1	0.0254608072935923
chr16	29188654	29189042	0.0315554599189523	1	0.0447132204850467	1	0.0352258524095336
chr1	1229534	1229589	0.012494434150146	1	0.0447338758996544	1	0.0199491910428754
chr12	129462997	129463021	0.0125004477518673	1	0.0447417197279865	1	0.0292638702508428
chr1	150253842	150254439	0.0315706246537277	1	0.044752439626707	1	-0.0191403462401383
chr12	3646215	3646576	0.0125135207990874	1	0.0447649897520383	1	0.0322271274861874
chr11	84634581	84634620	0.0315899727636134	1	0.0448023786670878	1	-0.0148875916546721
chr5	1223240	1223240	0.00788566208316916	1	0.0448063005812538	1	-0.0373758052550176
chr2	45168921	45168924	0.0125799318789655	1	0.0448468270276362	1	-0.026475277216698
chr8	1854608	1854947	0.0316116740219988	1	0.0448580698482455	1	-0.00822481092628424
chr6	75792730	75792730	0.00791337694327579	1	0.0448708814345212	1	-0.0601319444242334
chr5	115419633	115419881	0.0126066008952946	1	0.0448868305521297	1	0.020504819129528
chr2	242844781	242844876	0.0126609847717302	1	0.0449637000697839	1	0.030393152557285
chr3	105159482	105159482	0.00795782530382415	1	0.0449733741247268	1	-0.0611931770525194
chr16	10065222	10065222	0.0079638389055454	1	0.0449846169453361	1	0.0653258826946639
chr9	32955790	32956264	0.0126991580696129	1	0.0450105015788319	1	0.0214158481501606
chr5	78533917	78533917	0.00798344847637557	1	0.0450316799153285	1	0.0644423223420221
chr19	52034970	52035161	0.0316718100392113	1	0.0450379549779941	1	0.010139865796622
chr11	71951714	71952356	0.0316893279224862	1	0.0450907700887634	1	0.0263642473702948
chr10	85898649	85898700	0.0127621701572139	1	0.0450907700887634	1	-0.0310544323110524
chr7	99096450	99096450	0.00801979154764747	1	0.0451156088784816	1	0.0563416357265467
chr1	20501558	20502234	0.0317010936649843	1	0.0451200537145364	1	0.0138543880950558
chr1	91192451	91192466	0.0128147238070387	1	0.0451642406141404	1	0.0257310990698392
chr1	7587410	7587410	0.00804044696225524	1	0.0451668552235844	1	0.0785358503992495
chr10	80015831	80015831	0.00804489179831007	1	0.0451786209660825	1	0.0811093628760047
chr19	19655352	19655748	0.0128293656199252	1	0.0451848960287482	1	-0.0150279493216581
chr6	28829640	28829746	0.0317282856032022	1	0.0452024139120231	1	-0.0117424446547983
chr15	81488168	81488338	0.0128662316130859	1	0.045240064288017	1	0.0362596974459735
chr14	95077557	95077557	0.00807731295541594	1	0.0452583665541252	1	0.0819878700357756
chr17	928723	928747	0.012903359067191	1	0.0452860814142318	1	0.0344511336636234
chr15	81489160	81489338	0.01293002808352	1	0.0453208557198373	1	0.0478815981104367
chr1	21763130	21763251	0.0129323812320197	1	0.0453242547121145	1	0.0178525212515293
chr5	169010375	169010408	0.0129454542792398	1	0.0453451715876667	1	-0.0184644476948637
chr21	36041605	36041683	0.0317899903860811	1	0.0453849136512158	1	-0.00716044168270846
chr17	63822778	63822838	0.0129823202724005	1	0.0453898814091594	1	0.0306028175771256
chr9	116813975	116813975	0.00815548977779219	1	0.0454353756134854	1	0.07908520699031
chr2	145247292	145247292	0.00817013159067871	1	0.0454790395912006	1	-0.0457603076320415
chr5	154238919	154239514	0.0318456815672387	1	0.0455525101165776	1	0.0184828574050588
chr3	35706038	35706161	0.0318566629269036	1	0.0455909448754047	1	0.0331105164071896
chr10	11934150	11934239	0.0131512240424843	1	0.0456152607432341	1	0.0315649084317243
chr9	98619666	98619666	0.00823131345166881	1	0.0456293796342318	1	0.051505736330326
chr11	43291043	43291188	0.0132040391532535	1	0.0456824562059455	1	0.0247773757344865
chr7	27224092	27224123	0.0132505792013571	1	0.0457546194266005	1	-0.0114654075529558
chr3	139353025	139353058	0.0132545011155231	1	0.0457561881922669	1	0.0333155479347127
chr16	88186669	88186835	0.0132599917953556	1	0.0457661237081542	1	0.0274082932909151
chr7	4873428	4873549	0.0132720189987981	1	0.0457844259742623	1	-0.0185834798914956
chr9	23850969	23850969	0.00831158196160028	1	0.0458296587176439	1	-0.0599029822473279
chr19	843940	843995	0.0133530718915627	1	0.0458965927194108	1	0.0160654969797104
chr6	20211373	20211654	0.0133541177353403	1	0.0458979000241328	1	0.0292754720545444
chr6	168975151	168975424	0.0134061484632764	1	0.0459674486353438	1	-0.0214997938723079
chr1	57719013	57719013	0.00842950084752565	1	0.0460971332637673	1	0.06690184900499
chr16	215845	215864	0.0135366174745331	1	0.0461316461084284	1	0.0188833418396555
chr1	24071253	24071557	0.0135930930385239	1	0.0462093000089158	1	0.0277594534546495
chr10	80767136	80767136	0.00848022427073967	1	0.0462171438372479	1	0.05162568141942
chr16	34586894	34587120	0.0136459081492932	1	0.0462749267059608	1	-0.0342613565918618
chr14	38069079	38069206	0.0136780678454546	1	0.0463115312381771	1	-0.024317412957695
chr11	111637200	111637202	0.0137204245184478	1	0.046374543325778	1	0.013279132181119
chr1	36549719	36549726	0.0137416028549443	1	0.0464040884124954	1	-0.0186364807464524
chr10	80590072	80590072	0.00857801066394608	1	0.0464686692657628	1	0.0768732083756163
chr2	1942893	1942942	0.0138077524738781	1	0.0464874944537597	1	0.02408500311288
chr6	7141246	7141575	0.0138631821940913	1	0.0465614879010255	1	0.00468884815725529
chr19	21860753	21861136	0.0138945575074196	1	0.0466077664881847	1	-0.0356408633767106
chr3	128998585	128998642	0.0139269786645255	1	0.0466485543955114	1	0.0185113162344514
chr8	37823292	37823409	0.0139285474301919	1	0.0466498617002335	1	-0.0122901194011145
chr2	85361959	85362480	0.0321978694593484	1	0.046692479834171	1	-0.0250882317408554
chr2	142890490	142890700	0.0140388839487296	1	0.0467902662273774	1	-0.0200207427690684
chr1	243264842	243265016	0.0140699978011135	1	0.0468287009862045	1	-0.0176136011379157
chr1	3478767	3478767	0.00872835070697732	1	0.0468438657209799	1	0.069552999136699
chr1	228225659	228225886	0.032240487593286	1	0.0468496178617567	1	-0.0197753871591228
chr12	108740289	108740289	0.00877515221602531	1	0.0469633533725716	1	0.0714672525171077
chr7	128045859	128045859	0.00879057841174503	1	0.0470036183580096	1	-0.0370346916701793
chr17	32579022	32579022	0.00880652752935357	1	0.047035778054171	1	0.0570098988598077
chr19	6010222	6010231	0.0142436078681965	1	0.0470582636953896	1	-0.0187782185169295
chr1	234365540	234365756	0.0143108033309078	1	0.0471343488302107	1	0.0431127399437666
chr5	140011662	140012023	0.0143327660502376	1	0.0471615407684285	1	-0.0176595751046888
chr1	3608758	3608758	0.00886561770278846	1	0.0471863795581467	1	0.0610044223887863
chr7	158059976	158060003	0.0144007458957822	1	0.0472478228800812	1	0.0198358656887326
chr1	3827578	3827651	0.0144289836777776	1	0.0472778908886874	1	0.00634676337964581
chr16	49530608	49530608	0.00890562122728199	1	0.0472784138105763	1	0.0642356069734549
chr12	1553525	1553525	0.00891634112600247	1	0.0473037755221833	1	-0.0563126204054043
chr17	22012690	22012717	0.0144540839284402	1	0.0473121422724041	1	-0.0287691921485381
chr1	181480848	181480848	0.00894196429855388	1	0.0473649573831734	1	0.074142061924328
chr12	3580229	3580676	0.0144933030701006	1	0.047366003226951	1	0.0327327057724272
chr1	78956845	78956905	0.0323863828002624	1	0.0473754158209495	1	0.00988850379508419
chr9	139715701	139716215	0.0323863828002624	1	0.0473759387428383	1	0.0199331290553465
chr1	154943300	154943349	0.0145074219610983	1	0.0473856127977811	1	0.0195647255184663
chr7	150715831	150716072	0.0323916120191504	1	0.0473984243840568	1	-0.0273667574445784
chr2	778731	779099	0.0145701725877548	1	0.0474640510811018	1	0.0379989276129923
chr2	232220549	232220566	0.0145929196899178	1	0.04749542639443	1	-0.0123113329317334
chr3	32443454	32443496	0.0146188043234136	1	0.0475239256373699	1	0.0111898940684949
chr4	119759900	119759900	0.00903844338703828	1	0.0475898137953592	1	0.0233067140909247
chr1	3605087	3605087	0.00906537386431171	1	0.0476554404924042	1	0.0796104365785572
chr1	28919300	28919362	0.0147683599836116	1	0.0477090399860066	1	-0.0161247107267294
chr1	7449057	7449057	0.00910746907636045	1	0.0477487820495557	1	0.0616901144170467
chr13	53422808	53422847	0.0148292803836573	1	0.0477851251208276	1	0.00967207979304918
chr14	72943461	72943540	0.0148653619939848	1	0.0478319266298756	1	0.0240438327886357
chr8	10005423	10005590	0.032512929897353	1	0.0479077503037523	1	0.0296088334067566
chr5	92443321	92443321	0.00918669174251431	1	0.0479362495466921	1	-0.0557097842190677
chr6	40491590	40491590	0.00919871894595681	1	0.0479623956411323	1	0.0645996094557609
chr4	1523074	1523275	0.0149749141296893	1	0.0479707623913532	1	0.0120410530251318
chr10	1767482	1767511	0.0325312321634612	1	0.047994032415405	1	0.0142615354010782
chr6	1102332	1102379	0.0150089040524616	1	0.0480196555879564	1	0.0512057863406293
chr12	96184415	96184580	0.0325500573514582	1	0.0480782228395025	1	0.0127003862905598
chr6	168045662	168045888	0.0151302219306642	1	0.0481718258575984	1	0.0281843991045154
chr6	30899162	30899162	0.00929598241727441	1	0.0481720873185428	1	-0.0186730010276542
chr19	52222698	52223099	0.0151631660096589	1	0.0482084303898147	1	0.015830847810843
chr12	111484977	111485005	0.0151880047993771	1	0.0482303931091445	1	0.0421101511810749
chr1	3438863	3438863	0.00932108266793702	1	0.0482356223280326	1	0.0600596290697401
chr9	29826562	29826639	0.0152185957298721	1	0.0482735341649709	1	0.0366888240147782
chr2	238214874	238214874	0.00934696730143283	1	0.0482936666576898	1	0.0777125264226844
chr7	129913008	129913310	0.0326018266184498	1	0.048339945244849	1	-0.0253188508041823
chr8	86350381	86350390	0.0152805619736955	1	0.0483454359246815	1	0.0276844854486448
chr20	21694428	21694617	0.0153623992492933	1	0.0484445296226099	1	0.0358388320040461
chr4	11401173	11401665	0.0326219591111687	1	0.0484547265994416	1	0.0228049341917685
chr16	959952	960144	0.0153731191480138	1	0.0484552495213304	1	0.0380715056956196
chr2	95692727	95693023	0.0153799171325683	1	0.0484633548106068	1	-0.0276427796040045
chr17	881734	881743	0.0154068476098417	1	0.0484962988896015	1	0.0133089368504992
chr6	168842491	168843099	0.0326399999163325	1	0.0485561734458696	1	-0.0254677808725523
chr8	144850435	144850435	0.00946697787491342	1	0.0485684621102565	1	0.0377850022814783
chr12	10264192	10264389	0.032653334424497	1	0.0486155250802489	1	0.0184322490738011
chr5	389490	389763	0.0155328717850435	1	0.0486469003935772	1	-0.00981057701659582
chr22	22863655	22863663	0.0155433302228196	1	0.0486644182768521	1	-0.0281066110504137
chr2	144895454	144895454	0.00952554512645951	1	0.0487041603404012	1	-0.0375938911196924
chr17	655955	656181	0.0156303967173055	1	0.0487611588262809	1	-0.0200341341856561
chr20	31611438	31611438	0.00960659801922418	1	0.0488850913139275	1	0.0448257007148108
chr5	178367621	178368071	0.0327119016760431	1	0.0489114988693121	1	0.0065258671578782
chr1	57769718	57770145	0.015758774041007	1	0.048914636400645	1	0.0274812672268747
chr10	135087441	135087462	0.0157953785732233	1	0.0489580389174157	1	0.0147789848891076
chr8	58055024	58055168	0.0158058370109994	1	0.0489661442066922	1	-0.0222053699168456
chr2	9458925	9459065	0.0158432259260489	1	0.0490129457157402	1	-0.0283749211115016
chr3	148804272	148804275	0.0158518541372142	1	0.0490215739269055	1	-0.0152298535118551
chr10	103500093	103500682	0.0327349102391505	1	0.0490236656144607	1	-0.0154874391812156
chr2	144855085	144855085	0.00967091741154711	1	0.0490315094427927	1	-0.0531123847900478
chr1	6131294	6131676	0.0158696334814335	1	0.0490458897947349	1	0.0286324370171692
chr17	79370518	79371014	0.0327464145207042	1	0.0490879850067836	1	0.00544143977470823
chr2	145230271	145230271	0.00969601766220972	1	0.049088246467728	1	-0.0473973776340756
chr8	704109	704148	0.0159072838574274	1	0.0490885079286724	1	0.0383300472205065
chr18	63417385	63417392	0.0159483332256986	1	0.0491355708986648	1	-0.0174536981005829
chr5	172663731	172663784	0.0160014097974122	1	0.0491920464626557	1	0.0466033403397206
chr17	32561989	32561989	0.00978256123480683	1	0.049308658043859	1	0.0479703082691649
chr16	70285806	70285816	0.0161533186061099	1	0.0493585970842398	1	0.00913675775551342
[truncated: 15,373 more rows]
