# Supplementary material for: Large-scale placenta DNA methylation integrated analysis reveals fetal sex-specific differentially methylated CpG sites and regions
Source: Sci Rep. 2022 Jun 7;12:9396. doi: 10.1038/s41598-022-13544-z (PMC9174475; doi:10.1038/s41598-022-13544-z)
Supplement: Supplementary file 12 — Supplementary Information 12. [file 41598_2022_13544_MOESM12_ESM.csv]

chr	start	end	p.value	fwer	p.valueArea	fwerArea
chr6	30181713	30182507	2.67788091784904e-06	0.01	6.80181753133656e-05	0.205
chr6	72595944	72596748	0.00015451372895989	0.374	0.000414535966083031	0.695
chr19	52074293	52074501	9.29224678493617e-05	0.265	0.000451758510841133	0.72
chr7	86974674	86975087	8.89056464725881e-05	0.271	0.000455507544126122	0.721
chr10	126137517	126138879	0.000567978542675781	0.801	0.00120825987013349	0.938
chr15	31195612	31196382	0.000657687553423724	0.845	0.00138553558689509	0.951
chr11	46354562	46354997	0.000756769147384139	0.854	0.00165734050005677	0.97
chr8	91013007	91013697	0.000802560911079357	0.888	0.00167206884510494	0.97
chr5	150284416	150284796	0.000482018565212827	0.698	0.00177998744609426	0.973
chr15	78556834	78557094	0.00030581400081836	0.564	0.00182899266689089	0.977
chr19	52531438	52531956	0.000911550664435813	0.895	0.00184747004522405	0.977
chr7	116963259	116964802	0.000879951669605195	0.905	0.00184532774048977	0.977
chr5	126408756	126409310	0.0009490409972857	0.926	0.0020311726761885	0.984
chr5	139493544	139494006	0.00111426624991699	0.931	0.00210829564662255	0.985
chr12	21927425	21927990	0.00105321056499003	0.947	0.00233163091517116	0.989
chr7	56515510	56516309	0.00108855859310563	0.951	0.0024515999802908	0.989
chr15	64995133	64995684	0.0014297206220396	0.97	0.00249203598215032	0.99
chr6	48036280	48036676	0.00147926141901981	0.973	0.00259834785458892	0.992
chr5	133968566	133968668	0.000867633417383089	0.859	0.00292103250518973	0.995
chr15	40697634	40698392	0.00167153326892137	0.978	0.0027938331615919	0.995
chr8	146228251	146228461	0.000971535196995632	0.882	0.00306778037948786	0.996
chr1	7831052	7831811	0.0018927262327357	0.984	0.00309455918866635	0.996
chr4	169401183	169402197	0.00176874034623929	0.985	0.0033082540859107	0.996
chr19	58427935	58428186	0.000387221580720971	0.622	0.00452990336063344	0.997
chr2	175199576	175199694	0.000446938325189005	0.654	0.00478189195500303	0.997
chr2	177042789	177043427	0.000681520693592581	0.79	0.00363709786262257	0.997
chr3	158449734	158450251	0.00129770109278964	0.927	0.00470128773937578	0.997
chr1	153508511	153508713	0.00130439579508427	0.936	0.00353453502346895	0.997
chr20	23030250	23030533	0.00183408064063481	0.968	0.00418231441749663	0.997
chr19	17905589	17906309	0.00198779100531934	0.976	0.00436494589609394	0.997
chr21	37442104	37442777	0.00203492170947349	0.976	0.00442037803109341	0.997
chr1	173638690	173639135	0.00226682619695921	0.982	0.00468040026821655	0.997
chr19	12476105	12476845	0.00181506768611808	0.987	0.00346303560296238	0.997
chr2	70994962	70995522	0.00276250195485307	0.995	0.00460836527152641	0.997
chr13	45010973	45011224	0.0029944064423388	0.995	0.00502745363516979	0.998
chr18	53447211	53447841	0.00203545728565706	0.977	0.00571165220968022	0.999
chr10	134411480	134411480	0.000217443930529342	0.396	0.0145526760599588	1
chr2	30669597	30669863	0.000429264311131201	0.637	0.0079080501385	1
chr7	4244250	4244643	0.000465415703522163	0.663	0.00810889120733868	1
chr7	143140164	143140416	0.00087914830532984	0.816	0.0197946279566483	1
chr1	11783294	11783294	0.00121923918189667	0.847	0.0227293176545191	1
chr11	85873778	85873778	0.00156415024411562	0.887	0.0245505444667482	1
chr8	142192568	142192568	0.00167367557365565	0.899	0.0250596096292313	1
chr7	64451426	64451426	0.00179685809587671	0.915	0.0256897150092012	1
chr14	100441223	100441223	0.00183327727635945	0.923	0.0258694008187889	1
chr5	124309096	124309096	0.00200600059556072	0.929	0.0266325968803758	1
chr10	28032282	28032548	0.0014350763838753	0.931	0.00720992658321676	1
chr7	66785137	66785137	0.00213614560816818	0.934	0.0271946840850324	1
chr12	104237895	104237895	0.00213828791290246	0.934	0.0272059311848873	1
chr21	27107221	27107221	0.00217417151720164	0.937	0.027356963668654	1
chr5	170845058	170845058	0.00217738497430305	0.937	0.0273759766231707	1
chr9	95473718	95473718	0.0025881719071011	0.949	0.0291203482530576	1
chr17	75084281	75084281	0.0028417672300214	0.954	0.0300889377810436	1
chr5	65888284	65888284	0.00344402264844565	0.969	0.0321878608444537	1
chr17	40561514	40561514	0.00360657002015909	0.972	0.0327186168423714	1
chr6	52454298	52454298	0.0037873269821139	0.975	0.0332978424849021	1
chr1	62499140	62499140	0.00391291959716102	0.976	0.0337024702915891	1
chr3	112927486	112927486	0.00429264311131201	0.981	0.0349195671687515	1
chr7	151106990	151107400	0.00223040701647647	0.982	0.00596631868496766	1
chr17	35161825	35161825	0.00443671310469229	0.982	0.0353922131507518	1
chr19	12606183	12606729	0.00276598320004627	0.984	0.0143320186723281	1
chr8	109235928	109235928	0.00470717907739504	0.984	0.0362143225925315	1
chr7	41745179	41745376	0.00291219549816083	0.987	0.0145668688288234	1
chr7	149112142	149112402	0.00309777264576777	0.987	0.0148863400223228	1
chr6	160769116	160769754	0.00310982310989809	0.987	0.014907227493482	1
chr10	835505	835615	0.00353855184484572	0.987	0.0309721029077502	1
chr1	6507979	6508028	0.00362745749131831	0.987	0.0312374809067091	1
chr11	134176598	134176888	0.00247784321328572	0.988	0.00627561393097923	1
chr7	132261765	132262526	0.00313847643571908	0.99	0.00964251360899082	1
chr21	46975805	46976175	0.00333610404745633	0.99	0.0152885577361837	1
chr1	247537159	247537369	0.00398682911049365	0.99	0.0162930308684689	1
chr11	82535460	82535460	0.00565059652475326	0.99	0.0390370768680362	1
chr17	80084596	80084596	0.00568835464569493	0.99	0.0391460666213926	1
chr3	196756621	196756715	0.00416062358206205	0.991	0.0165498396484906	1
chr13	72441146	72441184	0.00426988112351029	0.991	0.016734881219914	1
chr2	241496830	241497554	0.00370699055457843	0.995	0.00618403040358879	1
chr5	1594282	1594733	0.00350561390955618	0.995	0.00737568741203161	1
chr3	45883249	45883621	0.00391586526617065	0.995	0.0105240720071467	1
chr7	1923695	1923695	0.00596899656588551	0.995	0.0399762097059258	1
chr2	237027592	237027592	0.00626731250013389	0.995	0.0408256335330675	1
chr1	19581542	19581542	0.00635755708706541	0.995	0.0410736053060604	1
chr11	4565489	4565489	0.00669979026836651	0.995	0.0420330900389257	1
chr8	146228149	146228236	0.00494952730046038	0.996	0.0176496453414512	1
chr6	736783	736838	0.00547760541746021	0.996	0.0183485722610098	1
chr18	31739202	31739207	0.0048161688307515	0.996	0.0344099664300848	1
chr15	65116255	65116557	0.00594944803518521	0.996	0.0370372353985865	1
chr1	201123745	201123745	0.00705889409945007	0.996	0.0430418477806794	1
chr14	81405846	81405846	0.00715047762684051	0.996	0.0432892839774887	1
chr6	156954565	156954565	0.00735346100041346	0.996	0.0438524423345123	1
chr18	77134251	77134251	0.00768658938659389	0.996	0.0447361430374025	1
chr2	163200532	163200975	0.00421685908133688	0.997	0.00672817580609571	1
chr2	208546083	208546089	0.00721367561650174	0.997	0.0398369598981977	1
chr3	112929830	112929835	0.00730874038908539	0.997	0.0400303029004664	1
chr16	12058616	12058616	0.00818601417777273	0.997	0.0460799036819791	1
chr16	103423	103423	0.00841095617487205	0.997	0.0466510956817563	1
chr15	102025217	102025217	0.00851780362349423	0.997	0.0469285241448455	1
chr9	129377854	129377854	0.00899098518167815	0.997	0.0481496378433847	1
chr1	40419732	40419732	0.00940123653829263	0.997	0.0491940114013458	1
chr13	23489940	23489940	0.0096730414514543	0.997	0.049882226797233	1
chr8	126608642	126608642	0.00971320966522204	0.997	0.049981843967377	1
chr14	21156471	21156471	0.0102916319434774	0.997	0.0514046020990302	1
chr3	48412245	48412245	0.0102972554934049	0.997	0.051414778046518	1
chr1	232086152	232086152	0.010468907660239	0.997	0.0518373476553546	1
chr1	95703607	95703607	0.0104956864694175	0.997	0.0518986711283733	1
chr10	133761284	133761284	0.0105077369335479	0.997	0.0519291989708368	1
chr1	92101219	92101219	0.0105221974905042	0.997	0.051961333541851	1
chr17	74679597	74679597	0.0107562442827242	0.997	0.0525073534610004	1
chr2	75059013	75059013	0.0109506584373601	0.997	0.0529725013764308	1
chr20	17680544	17680544	0.0115553239486104	0.997	0.0543767821297508	1
chr6	39290715	39290715	0.0116383382570637	0.997	0.0545760164700388	1
chr4	16077807	16077807	0.011671543980445	0.997	0.054657959626125	1
chr22	39527583	39527583	0.0118030279335114	0.997	0.0549723428458805	1
chr8	97747124	97747124	0.0122681758489418	0.997	0.0560333192655322	1
chr22	49579968	49579968	0.0122901344724682	0.997	0.0560882158243481	1
chr8	11660061	11660733	0.00440511410986167	0.998	0.00693624715341258	1
chr5	111093197	111093585	0.00412473997776288	0.998	0.00714833532210623	1
chr6	28984642	28984685	0.00427014891160208	0.998	0.00810380323359477	1
chr8	42356637	42356871	0.00620357893428909	0.998	0.0192681565681992	1
chr5	528580	528621	0.00875077926334709	0.998	0.0429805243076607	1
chr6	29342824	29342824	0.0129920070610364	0.998	0.0576478136709034	1
chr5	17381798	17381798	0.0132330163436428	0.998	0.0581665192046908	1
chr16	58704495	58704495	0.014507687660539	0.998	0.0608832293958486	1
chr10	124030740	124030740	0.0147063864246434	0.998	0.0612958908452892	1
chr22	45806309	45806309	0.0151337762191321	0.998	0.0621803949124547	1
chr7	29519297	29519297	0.0154639589363029	0.998	0.0628651290631487	1
chr2	213406960	213406960	0.0157944094415654	0.998	0.0635469175448331	1
chr2	233282380	233282380	0.0160399711217322	0.998	0.0640629451977026	1
chr5	134356114	134356114	0.0167881710501792	0.998	0.0655545248689445	1
chr1	41828130	41828130	0.0168623483516036	0.998	0.0656996660146919	1
chr12	53693322	53693485	0.00419677497445302	0.999	0.00739925276410868	1
chr17	12569110	12569322	0.00428862628993524	0.999	0.00777870849016789	1
chr5	36690259	36690602	0.00530327536970824	0.999	0.011930495065201	1
chr8	134271505	134271505	0.0169370612292116	0.999	0.0658485561937243	1
chr6	158492604	158492604	0.0170538168372298	0.999	0.0660860842311375	1
chr6	135137590	135137590	0.0173427601882657	0.999	0.0666441546144173	1
chr12	133078117	133078117	0.0176807087600983	0.999	0.0672697075968268	1
chr2	39319447	39319447	0.0184757716046077	0.999	0.0687977064485515	1
chr4	15151113	15151113	0.0186206449622633	0.999	0.0690679046331625	1
chr3	61237223	61237223	0.0186391223405965	0.999	0.0690968257470752	1
chr15	81412880	81412880	0.0186750059448956	0.999	0.0691648439223886	1
chr12	76023400	76023400	0.0197276809337021	0.999	0.0711001484617181	1
chr7	139351108	139351108	0.0198321182894982	0.999	0.0713042029876582	1
chr14	52816915	52816915	0.0203719790825366	0.999	0.0723027847819241	1
chr7	138229989	138229989	0.0204054525940097	0.999	0.0723667861358607	1
chr10	91453851	91453851	0.0208323068123148	0.999	0.0731374802640176	1
chr1	17309539	17309539	0.0210106536814436	0.999	0.0734617716431692	1
chr19	12768390	12768390	0.0210888478042448	0.999	0.0736023603913562	1
chr17	57187728	57187728	0.0212784417732285	0.999	0.0739486103940341	1
chr11	107461585	107461585	0.0213266436297498	0.999	0.0740460852594438	1
chr1	118427435	118427435	0.0215456942888298	0.999	0.0744515164304062	1
chr1	94445292	94445292	0.022677098976621	0.999	0.0765180371347103	1
chr17	59937758	59937758	0.0230142441841782	0.999	0.077114669003207	1
chr11	33797161	33797161	0.0230501277884774	0.999	0.0771789381452354	1
chr8	29082964	29082964	0.0235016185112267	0.999	0.0780074745012179	1
chr10	99278449	99278449	0.0235029574516857	0.999	0.0780117591106865	1
chr8	80783997	80783997	0.0236869278707419	0.999	0.0783462264373258	1
chr4	176987009	176987009	0.024976595320778	0.999	0.0807091885592358	1
chr2	43013772	43013772	0.0250065875870579	0.999	0.0807638173299599	1
chr6	33096133	33096133	0.0256562414977281	0.999	0.0819482440599246	1
chr7	2289888	2289888	0.0257981691863741	0.999	0.082210408601782	1
chr11	120233535	120233535	0.0263144646273354	0.999	0.0831696255465555	1
chr2	219229146	219229146	0.0264068515190012	0.999	0.0833501147204185	1
chr22	43168851	43168851	0.0267911274307125	0.999	0.0840811762109913	1
chr10	134095819	134095819	0.0268446850490695	0.999	0.0841789188644928	1
chr14	69341905	69341905	0.0269293060860735	0.999	0.0843299513482595	1
chr10	839609	839609	0.0273055483550313	0.999	0.0850403931557648	1
chr16	57541087	57541087	0.0274622043887255	0.999	0.085329068718709	1
chr4	190236439	190236439	0.0276236806080718	0.999	0.0856177442816531	1
chr7	12411370	12411370	0.0282955609303601	0.999	0.0868875954128971	1
chr20	5485144	5485294	0.00566559265789321	1	0.00846130033612761	1
chr12	123258933	123259330	0.0056800532148496	1	0.00847897435018542	1
chr5	147763501	147763705	0.00527810328908046	1	0.00905712884034902	1
chr2	45165527	45166314	0.00528399462709973	1	0.00906168123790937	1
chr10	62704173	62704408	0.00633613403972261	1	0.00956833630756641	1
chr1	33592870	33593154	0.00621991400788797	1	0.00994538194079955	1
chr6	26224013	26224714	0.00659160387928541	1	0.0101130172862569	1
chr3	45883676	45883796	0.00661436586708713	1	0.0103210886335738	1
chr5	134914371	134915042	0.00665319514039594	1	0.0103542943569551	1
chr2	75788038	75788273	0.00673915511785889	1	0.0104295428107467	1
chr17	1011974	1012579	0.00676834401986345	1	0.0104539115270991	1
chr1	150693100	150693482	0.00681199347882439	1	0.0107013477239083	1
chr11	111383288	111383624	0.00734141053628314	1	0.0110243001626009	1
chr5	72715464	72715996	0.007411303228239	1	0.0111057077425035	1
chr10	79397346	79398055	0.00759206019019381	1	0.0112912848901105	1
chr2	144994885	144995448	0.008191905515792	1	0.011910678746409	1
chr11	10562910	10563039	0.00822243335825548	1	0.0119404032245971	1
chr11	504784	504937	0.0086123328198943	1	0.0123734165690133	1
chr2	175199741	175200286	0.00601103929629574	1	0.0125889859829001	1
chr3	32443207	32443496	0.00638674598906996	1	0.0129349681974862	1
chr8	144660157	144660631	0.00918191809112079	1	0.0130961766287407	1
chr11	9635311	9636064	0.00926145115438091	1	0.0131909736132326	1
chr7	104624178	104624890	0.00939079280271301	1	0.0133591445348735	1
chr15	23810378	23811205	0.00940284326684333	1	0.0133770863370231	1
chr5	169930919	169931363	0.00950647725836409	1	0.0135294577612487	1
chr5	111093755	111093945	0.00979515282130822	1	0.0139472071844332	1
chr2	37384229	37384286	0.00989316326290149	1	0.0140982396681998	1
chr12	133022423	133022853	0.00990333921038932	1	0.0141145747417987	1
chr21	40759534	40759694	0.00999626167823868	1	0.014258644735179	1
chr14	59931541	59932128	0.00727714139425477	1	0.0142926538228357	1
chr5	67584194	67584297	0.0101896046805074	1	0.0145754380477605	1
chr1	207991597	207991780	0.00846210370040297	1	0.0147636930762853	1
chr10	98479991	98480465	0.00887021275228316	1	0.0151249392121032	1
chr17	32580869	32581466	0.0089529592726447	1	0.0151967064207015	1
chr7	138720457	138720808	0.0105495118758663	1	0.0152767750601452	1
chr12	6664872	6665330	0.00912889604894738	1	0.0153563081234053	1
chr16	29796373	29796798	0.0107921278870234	1	0.0158551973384006	1
chr2	220435506	220436045	0.0101486331024643	1	0.0162539338070683	1
chr7	65878503	65879115	0.0107131303999469	1	0.0167525552339718	1
chr6	28984269	28984453	0.0114034881005684	1	0.0180510596910368	1
chr6	28733419	28733695	0.0121591860955854	1	0.0180585577576068	1
chr1	240656342	240656667	0.0121822158714789	1	0.0180818553215921	1
chr11	10562070	10562473	0.0123723454166461	1	0.0182585954621701	1
chr4	85414016	85414194	0.0124197439088921	1	0.0183033160734982	1
chr10	28034792	28034816	0.0124208150612592	1	0.0183043872258653	1
chr10	126136228	126136709	0.0124583053941091	1	0.0183357184326042	1
chr10	75531995	75532717	0.0130340497914466	1	0.0188814705636618	1
chr6	30181581	30181604	0.0133869944964191	1	0.0192239715330547	1
chr7	22589311	22589830	0.0135074991377223	1	0.0193586689432225	1
chr1	47882314	47882739	0.0141156458941659	1	0.019985560866091	1
chr17	75369055	75369224	0.0142712307754929	1	0.0201550707281908	1
chr6	79620363	79620685	0.00750529684845551	1	0.0207666987298275	1
chr2	121103029	121103360	0.00787779008412831	1	0.021184448153012	1
chr1	101702519	101702689	0.00806684847692845	1	0.0213866281623096	1
chr7	158336016	158336049	0.00812040609528543	1	0.0214466126948694	1
chr8	2075469	2075820	0.00814718490446392	1	0.0214774083254247	1
chr1	65991176	65991664	0.0161465507822626	1	0.0222896096078083	1
chr21	42688650	42688849	0.00892537709919085	1	0.0223246898478321	1
chr20	61148178	61148408	0.00895563715356255	1	0.0223576277831216	1
chr11	124805538	124805981	0.0164309417357381	1	0.0226546047769111	1
chr7	56242554	56243297	0.00933509287962176	1	0.0227547575232387	1
chr7	28998078	28998214	0.00996091365012308	1	0.0234011979768074	1
chr11	115372874	115373119	0.0172985751531212	1	0.0238875011514888	1
chr18	37421510	37421828	0.0105345157427263	1	0.0239723899765846	1
chr4	1514621	1515209	0.0106127098655275	1	0.0240484417946515	1
chr13	72439386	72439779	0.0107163438570483	1	0.0241418998386845	1
chr3	148803905	148804275	0.0114688283949639	1	0.0249112550263825	1
chr11	5663136	5663329	0.0118539076709506	1	0.0252808025930456	1
chr18	47901419	47901440	0.0119345118865778	1	0.025356318834929	1
chr8	104152754	104153173	0.0123479767002937	1	0.0257521096345871	1
chr6	112575212	112575419	0.0184500639477963	1	0.0259012676017113	1
chr19	35417684	35418216	0.018459168742917	1	0.0259210839205034	1
chr6	33245128	33245181	0.0126192460372718	1	0.0260322159785941	1
chr3	43020791	43020846	0.0128399034249026	1	0.0262499276972152	1
chr8	146227953	146228110	0.0132107899320247	1	0.0266018012498206	1
chr18	30349476	30350221	0.0133529854087625	1	0.0267434611503748	1
chr7	97807643	97807741	0.0134480501813461	1	0.0268262076707363	1
chr20	61148684	61148784	0.0188753114375507	1	0.0268543254203737	1
chr7	75115627	75115669	0.0137386002609327	1	0.027119167843149	1
chr7	134143249	134143906	0.0190140256690953	1	0.0272032533039695	1
chr11	43902343	43902557	0.0190948976728144	1	0.0274051655251753	1
chr9	138967027	138967347	0.0144452930351531	1	0.0277875669202441	1
chr17	79881483	79881543	0.0193126093914355	1	0.0280017973936721	1
chr1	153013830	153014367	0.0149934552590368	1	0.0283068080302151	1
chr16	89883988	89884179	0.0194344529731976	1	0.0283501897010842	1
chr6	28834489	28834507	0.0152580298937203	1	0.0285529052865654	1
chr7	101559514	101559810	0.0195222874673031	1	0.0286367229592941	1
chr1	36348944	36349543	0.0195787907546697	1	0.0288303337496546	1
chr10	75531971	75531982	0.0157657561157444	1	0.0290183209900876	1
chr1	53527665	53527937	0.0159307135802839	1	0.0291816717260763	1
chr16	80966118	80966302	0.0198238168586529	1	0.0298013333704666	1
chr7	14029592	14029680	0.0166167866714369	1	0.0298248987225437	1
chr2	177053283	177053295	0.0198701441985317	1	0.0299984254060203	1
chr14	99728984	99729088	0.0174241677681683	1	0.0305693496177057	1
chr17	74070431	74070698	0.0177163245763057	1	0.0308449035641524	1
chr16	68563994	68564110	0.0178022845537686	1	0.0309230976869536	1
chr16	3508542	3509002	0.0179937530393948	1	0.0311049258012755	1
chr19	12305854	12306198	0.0182918011855514	1	0.0313850321452825	1
chr2	219858132	219858154	0.0183378607373384	1	0.0314276104518763	1
chr19	40324746	40324850	0.0202289802415234	1	0.0322207987797432	1
chr1	179555635	179555662	0.019412762137763	1	0.0324299412794272	1
chr22	19974307	19974685	0.0202525455936005	1	0.0324320835841615	1
chr10	3446963	3447019	0.0202945883240107	1	0.0332461593831876	1
chr2	219646481	219646831	0.0206898435474853	1	0.0336100833999233	1
chr4	4868794	4868983	0.0211201790109836	1	0.0340139078423349	1
chr19	54485404	54485494	0.0212797807136874	1	0.0341601201404495	1
chr2	73430289	73430646	0.0213314638154019	1	0.0342048407517776	1
chr13	100741041	100741163	0.0214916010942893	1	0.0343478395927907	1
chr2	20647987	20648580	0.0217360916220889	1	0.0345789407160011	1
chr11	124806508	124806901	0.0219720129309514	1	0.0348204855747911	1
chr11	1411012	1411020	0.0224700987816713	1	0.0353081276899314	1
chr5	87972056	87972127	0.022983448553623	1	0.0358008577788156	1
chr7	68326108	68326146	0.0234140518052131	1	0.0362421725540771	1
chr7	75932840	75932877	0.0250095332560675	1	0.0378497044690619	1
chr12	71003681	71003836	0.0253745284251704	1	0.0382425495997104	1
chr2	109745614	109745812	0.025707389023259	1	0.0385914774833061	1
chr11	2951578	2951613	0.0258230734789101	1	0.0387106431841504	1
chr3	192289245	192289293	0.0259034099064456	1	0.0387949964330626	1
chr17	32611290	32612007	0.0260919327230621	1	0.0389902139519738	1
chr4	74809912	74810142	0.0264148851617547	1	0.0393632427638302	1
chr21	47394015	47394354	0.0266671415442161	1	0.0396390644983686	1
chr16	2653501	2653839	0.0269317161788996	1	0.0399320246707813	1
chr5	178368253	178368620	0.0280596396214976	1	0.0412241022136435	1
chr6	74405811	74406097	0.029081251191657	1	0.0424752081784626	1
chr2	133430101	133430560	0.0296055802753718	1	0.0431224519963067	1
chr6	88877216	88877413	0.0298621212673018	1	0.0434617395085981	1
chr2	43020169	43020457	0.0299167500380259	1	0.0435302932600951	1
chr19	40324984	40325100	0.030114645437855	1	0.0437881731924839	1
chr4	75230901	75231177	0.030366098456041	1	0.0441330842547029	1
chr14	37131329	37131601	0.0307999151647325	1	0.04472677045419	1
chr1	60280809	60280868	0.0314142210472871	1	0.0455852990764524	1
chr6	170531660	170531847	0.0315020555413925	1	0.0457199964866202	1
chr5	175792493	175792510	0.0315173194626243	1	0.0457379382887698	1
chr5	135416381	135416398	0.0316758500129609	1	0.0459615413454102	1
chr7	27195960	27196286	0.0322515944102985	1	0.0468390829221893	1
chr2	1748112	1748337	0.0324010201655145	1	0.0470664350121147	1
chr10	102414426	102414501	0.0110151953674802	1	0.0471106200472592	1
chr9	139715701	139716215	0.0326827332380722	1	0.0475157834301298	1
chr11	2573972	2574042	0.0327510192014773	1	0.0476247731834863	1
chr4	140201065	140201262	0.0332030455004102	1	0.0483638683168126	1
chr8	638208	638330	0.0117358131224734	1	0.0483831490594211	1
chr7	27209463	27209582	0.0119738767360702	1	0.0487971494493206	1
chr3	49027828	49028278	0.0338939387772153	1	0.0495571320538061	1
chr10	1206555	1206690	0.0341004033959815	1	0.0499181104015322	1
chr1	12656114	12656315	0.0346868593169904	1	0.0510133636969324	1
chr2	183943938	183944048	0.0135441861062969	1	0.0513912126944409	1
chr1	47799633	47799638	0.0136427321240737	1	0.0515500110328694	1
chr5	147763303	147763393	0.0138915072613419	1	0.0519184874471654	1
chr12	127630314	127630812	0.0352347537527823	1	0.0520885328854488	1
chr8	86840929	86840954	0.0141461737366293	1	0.0523041022993357	1
chr6	26757644	26757842	0.0353662377058487	1	0.0523490906987555	1
chr7	155580742	155580862	0.0354080126481672	1	0.0524350506762185	1
chr7	101006573	101006963	0.0142709629874011	1	0.0524894116588508	1
chr10	124908083	124908488	0.0355020062683837	1	0.0526404441426175	1
chr5	523794	524127	0.0144431507304188	1	0.0527646978172057	1
chr6	64151739	64151745	0.0145540150004177	1	0.0529400990173248	1
chr6	108487063	108487078	0.0358158539119556	1	0.0533463335525625	1
chr4	169239733	169239850	0.0149465923429744	1	0.0535479779856766	1
chr13	21649722	21650028	0.0150411215393745	1	0.0536754451173662	1
chr6	17016226	17016484	0.0361487145100442	1	0.0541138142236181	1
chr16	29188654	29189042	0.03622610526857	1	0.054291893304655	1
chr3	96533295	96533511	0.0161063825684948	1	0.0552545914946217	1
chr4	4861618	4861820	0.0366572440963437	1	0.0553563509695	1
chr7	112726774	112726869	0.0369494009044811	1	0.0560933037980921	1
chr17	46691820	46692008	0.0168430676089951	1	0.0563110155167132	1
chr18	52989085	52989604	0.0370610685387554	1	0.0563993855870022	1
chr1	94313600	94313745	0.0371764852063147	1	0.0567260870589798	1
chr5	148034030	148034206	0.0372297750365798	1	0.0568792618474808	1
chr7	150093664	150094161	0.0178175484750004	1	0.0576960155274247	1
chr7	158740838	158740961	0.0374932785188962	1	0.0576986934083426	1
chr11	2906667	2906679	0.0179147555523183	1	0.057825089387665	1
chr15	45670872	45670875	0.0182393147195616	1	0.0582891661507283	1
chr12	24102807	24102832	0.0378049838577338	1	0.0586887059836714	1
chr10	42606808	42607194	0.018984568978999	1	0.059280517666516	1
chr1	205819179	205819406	0.0380117162645918	1	0.0594363703359348	1
chr8	8559461	8559678	0.0381231161107743	1	0.0598712581969935	1
chr4	967324	967327	0.0194459678611444	1	0.0599044639203748	1
chr2	8116953	8116961	0.0195260365005881	1	0.0600091690642627	1
chr2	237087777	237088197	0.0196061051400317	1	0.0601136064200588	1
chr5	133967994	133968296	0.0198835336031209	1	0.0604885097485577	1
chr13	45011353	45011471	0.0200442064581919	1	0.0607094349242802	1
chr2	144500981	144501227	0.0208261476862038	1	0.0617484527204057	1
chr2	60780415	60780474	0.0386174529282092	1	0.061937243325114	1
chr9	34958139	34958499	0.0210925968375298	1	0.0620839911994122	1
chr11	66610747	66610763	0.0212937056944602	1	0.0623616874505931	1
chr17	12568761	12569089	0.0212961157872863	1	0.0623640975434192	1
chr7	64894780	64894861	0.0217438574767506	1	0.0629248458076167	1
chr7	28893923	28894057	0.0223779796780973	1	0.0636987533928751	1
chr1	62119764	62119829	0.0224751867554152	1	0.0638211325508208	1
chr16	86601133	86601520	0.0224925929813812	1	0.0638441623267143	1
chr8	11665969	11666017	0.0230072816937918	1	0.0644547191759839	1
chr4	54957484	54957554	0.0232855135211563	1	0.064804450423855	1
chr20	22559339	22559346	0.0235024218755021	1	0.0650706317870892	1
chr6	108487160	108487183	0.0239493602006911	1	0.0656013877850069	1
chr15	29396200	29396267	0.0247187153883891	1	0.0664909798259163	1
chr15	23810238	23810280	0.0248984011979768	1	0.0666958377161318	1
chr2	242707237	242707603	0.0250116755608018	1	0.0668377654047778	1
chr1	67218135	67218165	0.0260241823358405	1	0.0680337070226892	1
chr4	169239550	169239619	0.0261366533343902	1	0.0681536760878088	1
chr17	32682770	32683054	0.0267932697354468	1	0.0689072317780915	1
chr7	134144036	134144055	0.0278788826595428	1	0.070136646907476	1
chr20	982991	983002	0.0289532484837838	1	0.0713229481540831	1
chr1	201617355	201617443	0.0292376394372594	1	0.0716335823405536	1
chr5	87971573	87971794	0.0293123523148674	1	0.0717136509799973	1
chr17	26645466	26645523	0.0308714145852391	1	0.0734473110862128	1
chr8	15397731	15397899	0.0322631092982452	1	0.0749728998451114	1
chr11	111170104	111170390	0.0323900408537513	1	0.0751145597456656	1
chr8	21867933	21868116	0.0324055725630748	1	0.0751322337597234	1
chr6	32552246	32552350	0.0328575988620077	1	0.0756327297032694	1
chr10	93392836	93392839	0.0331907272481881	1	0.0759915657462611	1
chr10	106014624	106014893	0.0338543061396311	1	0.0767170036869065	1
chr16	56651356	56651367	0.0343780996471624	1	0.0773106898863936	1
chr8	23082233	23082420	0.0346485656198652	1	0.0776055245754488	1
chr1	6508954	6509182	0.0349468815541135	1	0.0779118741524507	1
chr11	44330903	44330958	0.0354114938933604	1	0.0784249561363106	1
chr3	128211540	128211686	0.0363375051147526	1	0.07943157157333	1
chr8	146228807	146228920	0.0364802361676739	1	0.0795892987593913	1
chr2	131792772	131793064	0.0366577796725273	1	0.0797866585830368	1
chr11	120435560	120435915	0.0367298146692174	1	0.079864852705838	1
chr6	137736547	137736599	0.0368393399987575	1	0.0799901775327933	1
chr4	206442	206562	0.0370385743390454	1	0.0802218142321873	1
chr1	110230401	110230456	0.0373920546202015	1	0.0806103747533672	1
chr13	45009477	45009596	0.0384246455021241	1	0.0817567755742983	1
chr6	32632937	32632957	0.0390740316247025	1	0.0824540957653062	1
chr14	103021989	103022105	0.039593808310857	1	0.0830397483220398	1
chr2	68691913	68692224	0.0396093400201805	1	0.0830552800313633	1
chr14	89016862	89016979	0.0399480919562884	1	0.0834451794930022	1
chr19	58570466	58570468	0.0403412048750287	1	0.0838867620563555	1
chr2	80531597	80531599	0.0403837831816225	1	0.0839365706414275	1
chr2	208632832	208632990	0.0406245246761371	1	0.084211053435507	1
chr11	1669317	1669376	0.040675672201668	1	0.0842675567228736	1
chr2	79220510	79220528	0.0409517617242982	1	0.084572031783233	1
chr8	101661788	101661918	0.0411319831100695	1	0.0847656425735935	1
chr3	124860686	124860871	0.0416895179171656	1	0.0854112796628869	1
chr4	1523074	1523275	0.0421897460726198	1	0.0859915764577848	1
chr17	37024020	37024042	0.0423656828489225	1	0.086186793976696	1
chr6	28984832	28984874	0.0424029053936806	1	0.0862299078594734	1
chr17	15848067	15848072	0.0430131944548584	1	0.0869157131625345	1
chr16	3334135	3334273	0.0431342346723452	1	0.0870691557391273	1
chr10	8094093	8094142	0.0432833926394694	1	0.0872480381844396	1
chr8	1905131	1905131	0.0284988120920248	1	0.0872509838534492	1
chr12	54954337	54954396	0.044371951232575	1	0.0884662062139691	1
chr12	54388539	54388841	0.044475317436004	1	0.0885768026958763	1
chr10	133376942	133376942	0.0297582194876892	1	0.0896321555656006	1
chr5	121412702	121412970	0.0460716022511338	1	0.0904135612174289	1
chr19	54485730	54486058	0.0460718700392256	1	0.0904135612174289	1
chr8	144399335	144399335	0.030617551474227	1	0.0912324572021072	1
chr1	2844356	2844356	0.0307854546077761	1	0.0915393423552927	1
chr14	102094825	102094930	0.0475163190063134	1	0.0920845589101667	1
chr8	86157836	86157838	0.0477838393100065	1	0.0923810003277726	1
chr1	1168541	1168550	0.0478146349405618	1	0.0924184906606225	1
chr8	91681699	91681699	0.0313277254936406	1	0.0925767534228674	1
chr12	53693949	53694018	0.0481482989029257	1	0.0928121391555463	1
chr7	105306555	105306555	0.0314608161752577	1	0.0928126747317299	1
chr3	119420208	119420208	0.0319813962256875	1	0.0937922435714791	1
chr10	134556992	134556992	0.032160010882908	1	0.0941170705268142	1
chr8	131265658	131265658	0.0325461613112619	1	0.0948376882818073	1
chr17	79318066	79318146	0.0502493642710701	1	0.0952575800097261	1
chr20	23550632	23550632	0.0328404604241335	1	0.0953815658962225	1
chr1	39025249	39025311	0.0504301212330249	1	0.0954750239402554	1
chr19	57019069	57019279	0.0504694860825173	1	0.095527778194337	1
chr10	134672797	134672797	0.0331816224530675	1	0.0960360399925448	1
chr15	69323995	69324108	0.0509209768052666	1	0.0960529106423272	1
chr6	30710898	30710901	0.0512160792824136	1	0.0963879135451501	1
chr1	46420220	46420220	0.0335436719531607	1	0.0967087236791085	1
chr15	79269735	79269735	0.0335725930670734	1	0.0967601389927312	1
chr2	160918519	160918675	0.0516421301364434	1	0.0969103681122225	1
chr7	83824382	83824384	0.051752191042167	1	0.0970410487010135	1
chr3	119348585	119348585	0.0337608480955982	1	0.0971146904262544	1
chr12	133123627	133123942	0.0518394899600889	1	0.0971412014473411	1
chr4	39460490	39460490	0.0338374354898487	1	0.0972574214791757	1
chr19	9609405	9609422	0.0519677604560538	1	0.097299464209586	1
chr5	95478736	95478736	0.0340192636041706	1	0.0976009936009358	1
chr9	86886588	86886638	0.0524770934066287	1	0.0978832422496771	1
chr12	130589252	130589287	0.0525282409321596	1	0.0979469758155219	1
chr14	103018726	103018726	0.0344276404441426	1	0.0983698132124502	1
chr13	113623639	113623659	0.0529382245006823	1	0.0984528275209035	1
chr19	3771880	3771880	0.0345213662762673	1	0.0985393230745501	1
chr11	19734989	19735068	0.053225025546984	1	0.0987870270594511	1
chr4	11431253	11431359	0.053388108494881	1	0.0989867969759226	1
chr9	125133314	125133318	0.0535444967404833	1	0.0991828178591092	1
chr22	24989065	24989071	0.0536331345988642	1	0.0992987701028521	1
chr17	75378036	75378036	0.035293667132975	1	0.0999743994584254	1
chr2	43051175	43051175	0.0353785559580708	1	0.100141767015791	1
chr19	21688397	21688519	0.0545205843350393	1	0.100353587396393	1
chr1	180881583	180881646	0.0547174085825012	1	0.100586563036246	1
chr22	24988729	24988758	0.0549447606724266	1	0.100870953989721	1
chr16	27741555	27741555	0.035822816402342	1	0.100960395212377	1
chr10	105357975	105357975	0.0359232369367613	1	0.101144097843342	1
chr7	157985748	157985780	0.0552114776118444	1	0.101190960759404	1
chr16	11374865	11374865	0.0362156615329904	1	0.101691992279134	1
chr12	117798954	117799083	0.0559331665192047	1	0.102089122019251	1
chr9	1042202	1042605	0.0559915443232138	1	0.102166512777777	1
chr17	33734664	33734664	0.0367201742979132	1	0.102622020321903	1
chr5	134688497	134688497	0.0368098833086611	1	0.102791530184003	1
chr5	63461566	63461574	0.0565223003211315	1	0.102825539271659	1
chr5	121742044	121742044	0.0368942365575734	1	0.102948989581972	1
chr7	1133730	1133730	0.0369234254595779	1	0.103007367385981	1
chr7	88388555	88388564	0.0571451754226232	1	0.103601589161652	1
chr15	97491245	97491433	0.0571783811460045	1	0.10364175737542	1
chr19	3801548	3801727	0.0572027498623569	1	0.103675498674985	1
chr6	167195910	167195910	0.0374035695081483	1	0.103924541600344	1
chr17	32690367	32690412	0.0576587929826666	1	0.104218305137033	1
chr12	126018228	126018298	0.0577187775152264	1	0.104293285802732	1
chr15	97311928	97311928	0.037687692673532	1	0.104448335107876	1
chr2	238252272	238252272	0.0377136681184352	1	0.104494394659663	1
chr8	110703460	110703888	0.0585280331286004	1	0.105287850775621	1
chr5	175297531	175297531	0.0381469492509431	1	0.105325876684655	1
chr16	34787199	34787392	0.058847236534008	1	0.105686051668106	1
chr1	227177885	227177885	0.0383791215265207	1	0.105773886162211	1
chr17	1131781	1131878	0.058971757996688	1	0.105836012999505	1
chr2	242887344	242887344	0.0384128628260856	1	0.105839494244698	1
chr18	78005475	78005477	0.0590384372315424	1	0.105920098460326	1
chr4	87282697	87282697	0.0385925486356732	1	0.106176371664164	1
chr6	32634344	32634362	0.0594334246669252	1	0.106409079515925	1
chr5	80597718	80597828	0.0594679693307654	1	0.106450586670151	1
chr10	132886921	132887033	0.059617930662165	1	0.106641251791502	1
chr10	93999688	93999904	0.0599339206104712	1	0.107058465638503	1
chr11	74178749	74178761	0.0600988780750107	1	0.107279926390409	1
chr7	28449474	28449847	0.0602383956708306	1	0.107455327590528	1
chr8	2021420	2021420	0.0393715441946755	1	0.107595380762532	1
chr22	23489041	23489041	0.0394757137623798	1	0.107810950176419	1
chr12	7781431	7781431	0.0396540606315086	1	0.108138722800764	1
chr10	46992909	46993210	0.0611480718186239	1	0.108634934134841	1
chr1	31732891	31732891	0.0400592240143791	1	0.108887458305394	1
chr19	56879662	56879933	0.061622324529175	1	0.109236118400898	1
chr12	13254280	13254403	0.06184512422154	1	0.109507119949784	1
chr11	119191833	119191974	0.0621619175341216	1	0.109902910749442	1
chr8	1812614	1812709	0.0623715956099891	1	0.110164539715116	1
chr14	98444533	98445007	0.0623973032668005	1	0.110196138709947	1
chr16	20780262	20780262	0.0410744086703357	1	0.110790896061801	1
chr9	90113813	90113998	0.0631864747732906	1	0.111224712770493	1
chr7	112726549	112726653	0.0632279819275173	1	0.111280144905492	1
chr20	33298052	33298113	0.064236739669271	1	0.112600607986084	1
chr7	158114605	158114659	0.0642747655783045	1	0.112646935325962	1
chr14	37053331	37053601	0.0642755689425798	1	0.11264800647833	1
chr12	122688708	122688787	0.0644394552547522	1	0.112855810037555	1
chr6	36887307	36887307	0.0428629653353671	1	0.114046931469814	1
chr2	26402008	26402098	0.0654112582398396	1	0.114165561594475	1
chr14	24712222	24712224	0.0654372336847427	1	0.114204390867783	1
chr5	175200015	175200071	0.0655191768408289	1	0.114310702740222	1
chr19	13617091	13617094	0.0655992454802726	1	0.114425851619689	1
chr2	71723690	71723690	0.0432043951523928	1	0.114676233485508	1
chr7	76221076	76221076	0.0432060018809436	1	0.114679714730702	1
chr14	95157213	95157380	0.0662847829952419	1	0.115361771000478	1
chr10	119304583	119304586	0.0671446505579633	1	0.116493443476361	1
chr6	168147405	168147405	0.0444016757107632	1	0.116823893981623	1
chr14	70654824	70655056	0.0675939989759783	1	0.117131314710992	1
chr17	15848221	15848253	0.0676338994016543	1	0.11718192666034	1
chr19	52514445	52514445	0.0447468545610739	1	0.117450250328308	1
chr17	21280501	21280591	0.067852146696459	1	0.117492025270627	1
chr1	228604065	228604240	0.0681343953452003	1	0.117877104546613	1
chr1	53099053	53099248	0.0681694755852241	1	0.117922896310309	1
chr5	113697895	113697897	0.0682171418655618	1	0.117987165452337	1
chr1	244140051	244140051	0.0450497228928826	1	0.117997341399825	1
chr21	27945841	27945841	0.0450507940452498	1	0.117998412552192	1
chr5	132158560	132158625	0.0682332091510689	1	0.118012873109148	1
chr12	133132982	133132982	0.0450968535970368	1	0.118080355708278	1
chr4	134069236	134069304	0.0683290772879279	1	0.118149980612142	1
chr4	46995741	46995743	0.0691471699083308	1	0.119291561247421	1
chr1	85513124	85513191	0.0692631221520736	1	0.119447146128748	1
chr11	2291652	2291677	0.0693298013869281	1	0.119535783987129	1
chr8	53477881	53478023	0.0696688211111278	1	0.12002208716181	1
chr12	103325781	103325781	0.0466146765012736	1	0.120788496680499	1
chr1	205499355	205499355	0.0466369029128917	1	0.120827593741899	1
chr6	110222866	110222866	0.0467432147853304	1	0.121026292506004	1
chr17	406426	406501	0.0704376407226422	1	0.121106896721631	1
chr14	67878690	67878690	0.0468264968818755	1	0.121172237016027	1
chr4	188736172	188736336	0.0705477016283658	1	0.121257125841122	1
chr5	104728220	104728427	0.0706588336864566	1	0.121419405424744	1
chr2	26785367	26785460	0.070882436743097	1	0.121731914127857	1
chr17	35414006	35414006	0.0472022035746497	1	0.121850544252518	1
chr6	3023894	3024023	0.0713652586725851	1	0.122419326159469	1
chr1	207224549	207224567	0.0714048913101693	1	0.122468331380266	1
chr2	88927127	88927196	0.0715106676064243	1	0.122620970592583	1
chr2	214148856	214148862	0.0716169794788629	1	0.122781643447654	1
chr3	124861521	124861521	0.0477391186986784	1	0.122805744375915	1
chr3	111853297	111853297	0.0480173505260429	1	0.123292047550596	1
chr2	36815511	36815511	0.0480224384997868	1	0.123299010040982	1
chr5	135416412	135416529	0.0720462437899941	1	0.123385505594629	1
chr9	104501030	104501030	0.0482313132113791	1	0.123660523964892	1
chr16	215864	215960	0.0727821254662191	1	0.124481562254304	1
chr18	72102996	72102996	0.0490287861487145	1	0.125067214811038	1
chr10	63213339	63213385	0.0732127287178092	1	0.125114881091376	1
chr7	144184387	144184387	0.0491249220736653	1	0.125236189096954	1
chr5	43396953	43397113	0.0736336915980951	1	0.125743111954703	1
chr11	74178268	74178462	0.0738500643762573	1	0.126052942776898	1
chr7	39649290	39649359	0.0738524744690833	1	0.126055352869724	1
chr19	47742829	47742961	0.0738572946547355	1	0.126063386512478	1
chr17	77776714	77776716	0.074001096860024	1	0.126277349197814	1
chr5	16895511	16895511	0.049846075404842	1	0.126481403723754	1
chr3	39847605	39847605	0.050066465004381	1	0.126863537330731	1
chr2	149310951	149310951	0.0501259139607573	1	0.126962618924692	1
chr1	94313343	94313454	0.0744724039015654	1	0.12697734726974	1
chr17	77922972	77922972	0.0501899153146939	1	0.12706893079713	1
chr7	14030466	14030482	0.0745476523553569	1	0.127096512970584	1
chr6	31239243	31239247	0.074565058581323	1	0.127123023991671	1
chr2	73215647	73215647	0.0503463035602962	1	0.127336183312731	1
chr19	49202858	49202858	0.050361567481528	1	0.127366443367103	1
chr15	41096921	41096921	0.0506146272282647	1	0.127817398513669	1
chr10	45496476	45496482	0.0750950112149653	1	0.127904161855407	1
chr11	66624256	66624258	0.0752990657409054	1	0.128202210001564	1
chr6	10426588	10426637	0.0753968083944069	1	0.128352974697239	1
chr20	3148787	3148934	0.0756396921936558	1	0.128723057840086	1
chr2	144698389	144698389	0.0512388412702153	1	0.128904082590132	1
chr15	79092743	79092878	0.0759069447092571	1	0.129115635182642	1
chr18	77836355	77836355	0.0516271340033034	1	0.12955936005073	1
chr8	38847958	38847958	0.051819405853205	1	0.129880705760872	1
chr2	223156106	223156136	0.0766128341192021	1	0.130196427921086	1
chr8	143858612	143858612	0.0522334062431045	1	0.130592754296928	1
chr12	47471907	47471979	0.0769526572076772	1	0.130722899309535	1
chr5	10333766	10333868	0.077275341858278	1	0.131216700550787	1
chr7	11871535	11871690	0.0773733522998712	1	0.131376570041582	1
chr11	78512268	78512268	0.0528830601537746	1	0.131731657051289	1
chr15	101084442	101084442	0.0530402517636524	1	0.131997838414523	1
chr15	89312795	89312863	0.0785425151086041	1	0.133198868006178	1
chr12	53473636	53473666	0.0787104182421533	1	0.133473886376442	1
chr5	53545	53564	0.0788137844455822	1	0.133628667893493	1
chr8	41517301	41517301	0.0540482061411308	1	0.133699363949724	1
chr11	3108505	3108505	0.0541700497228929	1	0.13390422183994	1
chr6	157825146	157825146	0.0541729953919025	1	0.133909577601776	1
chr11	111383668	111383889	0.0790502413306283	1	0.134011069288562	1
chr11	9025730	9025767	0.0795547540955511	1	0.134820324901936	1
chr8	109095568	109095572	0.0796682962464679	1	0.135002956380533	1
chr1	10699831	10699958	0.0798169186374085	1	0.135238342113212	1
chr6	55104866	55105265	0.0799141257147264	1	0.135385625563694	1
chr7	151106082	151106245	0.0801674532495549	1	0.135815961027192	1
chr6	32822857	32822857	0.0553319822531476	1	0.135840329743545	1
chr12	133250118	133250118	0.0554420431588712	1	0.136021890069775	1
chr4	53210660	53210660	0.0555055089366242	1	0.136129808670764	1
chr8	1808270	1808475	0.0803699010469443	1	0.136151767294291	1
chr2	173118470	173118470	0.0566553910027486	1	0.138053598322147	1
chr6	88986780	88986780	0.0568069590626988	1	0.138305854704608	1
chr4	104640833	104641033	0.081990019002243	1	0.138792693455473	1
chr6	167704769	167704808	0.0820119776257694	1	0.138835271762067	1
chr17	7982898	7983072	0.0822594138225786	1	0.139240702933029	1
chr12	130590197	130590231	0.082273874379535	1	0.139268285106483	1
chr2	65640057	65640057	0.05747027016605	1	0.139385040714501	1
chr11	69867046	69867139	0.0823563531118047	1	0.139403518092835	1
chr3	156534380	156534380	0.0575382883413634	1	0.139501528534428	1
chr14	99506767	99507062	0.082638601760546	1	0.13986491697498	1
chr1	160121487	160121487	0.0577747452264095	1	0.139887143386598	1
chr2	54952078	54952081	0.0827342021093132	1	0.14002237637295	1
chr3	197183481	197183582	0.0829136201308091	1	0.140331939407053	1
chr6	169857450	169857450	0.0580516381133151	1	0.140339437473623	1
chr1	214317404	214317404	0.0581392048193287	1	0.140486720924105	1
chr7	28997485	28997485	0.0582538181226127	1	0.140674975952629	1
chr11	111170635	111170648	0.0833910862984616	1	0.141159136822576	1
chr13	100989375	100989375	0.0588882081120511	1	0.141688018303852	1
chr8	81599484	81599514	0.0839036327061379	1	0.142082470163051	1
chr10	25620462	25620462	0.0594130727719495	1	0.142516019083651	1
chr22	18479382	18479382	0.0597665530531056	1	0.14309203126908	1
chr2	219906404	219906406	0.0844898208390551	1	0.143101136064201	1
chr10	66311542	66311542	0.0600102402166299	1	0.143465060080936	1
chr8	22926898	22926909	0.0847643036331346	1	0.143604042100573	1
chr4	1006240	1006270	0.0847645714212264	1	0.143604042100573	1
chr11	790761	790761	0.0600978069226435	1	0.143604577676756	1
chr19	40562337	40562354	0.0850082585847506	1	0.144054729459047	1
chr12	33592642	33593004	0.0852382885555939	1	0.144456411596724	1
chr5	43289541	43289541	0.0606984556125171	1	0.144551744157399	1
chr1	52082593	52082593	0.0608294039893999	1	0.144761957809451	1
chr11	2907071	2907073	0.0854803689905674	1	0.14489986867672	1
chr5	16180048	16180055	0.0854905449380553	1	0.144917007114594	1
chr1	8152878	8152878	0.0609496408426113	1	0.144948873897516	1
chr7	1121190	1121190	0.0610899618027066	1	0.145184259630195	1
chr10	81892109	81892109	0.0615706414274605	1	0.145939154260937	1
chr6	30899162	30899162	0.0620143662955481	1	0.146639420120955	1
chr2	134767366	134767369	0.0868385901921005	1	0.147376372949547	1
chr3	147131617	147131860	0.0873738985875785	1	0.148388611936494	1
chr3	148804477	148804489	0.0878893906642644	1	0.14936175386204	1
chr4	80886143	80886264	0.087901173340303	1	0.149387729306943	1
chr11	536758	536817	0.0881826186247689	1	0.149936694895102	1
chr17	78093353	78093353	0.0641655080368562	1	0.149946067478315	1
chr1	154238265	154238265	0.0643315366537629	1	0.150198323860776	1
chr5	169930870	169930879	0.0885449359129539	1	0.150615537707777	1
chr13	21889774	21889774	0.0646017348383738	1	0.150615805495869	1
chr8	143820480	143820828	0.0887230149939908	1	0.150975177115044	1
chr15	51236304	51236304	0.0649919020881044	1	0.151190746528931	1
chr1	15392308	15392433	0.0892010167378269	1	0.151921540231412	1
chr17	72109759	72109809	0.0894358668943222	1	0.15237142422561	1
chr10	106440778	106440892	0.0894519341798293	1	0.152405968889451	1
chr7	2099404	2099404	0.0662684479216431	1	0.15311400060413	1
chr1	67217853	67217886	0.0898364778796325	1	0.153173449560506	1
chr17	1082705	1082774	0.0899288647712983	1	0.153363579105673	1
chr10	22634226	22634226	0.0664352799028251	1	0.153370006019876	1
chr4	55097476	55097576	0.0899529656995589	1	0.153418475664489	1
chr7	51293912	51293912	0.0665544456036693	1	0.153545407219995	1
chr10	52434778	52434778	0.0665697095249011	1	0.153566026903063	1
chr1	52387259	52387259	0.0666278195408184	1	0.15365707485427	1
chr19	17839689	17839689	0.0669673748412017	1	0.154169889050038	1
chr20	62402415	62402415	0.0669984382598487	1	0.154214609661366	1
chr19	1646212	1646212	0.0670538703948482	1	0.154291197055616	1
chr12	312592	312595	0.090452122702646	1	0.154455351155881	1
chr15	22982193	22982193	0.0672215057403055	1	0.154541578921435	1
chr17	32575548	32575548	0.0675024154485879	1	0.154950759125683	1
chr13	114280854	114280887	0.0907638280414836	1	0.15510634400701	1
chr20	11869467	11869467	0.0677053988221609	1	0.155238095748168	1
chr2	224897425	224897425	0.0677289641742379	1	0.155269426954907	1
chr6	28457925	28458175	0.0909180739823517	1	0.155465715626185	1
chr17	59539587	59539715	0.0909325345393081	1	0.155491423282996	1
chr4	7131136	7131136	0.06799782341839	1	0.15564352691913	1
chr10	134600651	134600656	0.0910921362420119	1	0.155832317523838	1
chr2	26401718	26401820	0.0911231996606589	1	0.155894176573041	1
chr13	113664019	113664019	0.0682345480915278	1	0.155989241345624	1
chr2	192711926	192712158	0.091167920271987	1	0.155995400471735	1
chr2	65212362	65212362	0.0682690927553681	1	0.156036372049779	1
chr3	138668931	138668931	0.0683191691285319	1	0.156105461377459	1
chr8	15398278	15398333	0.091225226923629	1	0.156119921934415	1
chr19	37466940	37466940	0.0687894050177062	1	0.156792605620979	1
chr4	39531927	39531927	0.0691474376964226	1	0.157302474147738	1
chr1	219634786	219634786	0.0691525256701665	1	0.15731184673095	1
chr1	22425642	22425642	0.0691578814320022	1	0.157323093830805	1
chr5	50265443	50265443	0.069161898253379	1	0.157328985168824	1
chr1	243053673	243053673	0.0692210794216634	1	0.157411999477278	1
chr7	64314295	64314295	0.0693624715341258	1	0.157602129022445	1
chr4	68622534	68622534	0.0693742542101644	1	0.157617392943677	1
chr2	73461528	73461528	0.0696032130286405	1	0.157950789117949	1
chr17	55966003	55966003	0.0697156840271901	1	0.158111194184928	1
chr2	234847769	234847769	0.0698404732779619	1	0.158288202113598	1
chr11	5960015	5960081	0.092339493173546	1	0.158558132510117	1
chr3	182971483	182971663	0.0923518114257681	1	0.158587589200213	1
chr9	124461412	124461412	0.0700723777654476	1	0.158613029068933	1
chr16	88034967	88034967	0.0703433793143339	1	0.158987932397432	1
chr20	61560373	61560434	0.0926651234931564	1	0.15930579686238	1
chr8	86841010	86841010	0.0707174792785575	1	0.159527257614287	1
chr1	85686316	85686316	0.0708843112597395	1	0.159758894313681	1
chr1	158083432	158083475	0.0929213966969946	1	0.15992090610921	1
chr4	165305050	165305238	0.0930544873786117	1	0.160212795129256	1
chr14	65240980	65240980	0.0713191991207981	1	0.160371057891501	1
chr3	31494586	31494586	0.0713250904588174	1	0.160379359322346	1
chr16	49802162	49802298	0.0933445018820147	1	0.160899671584684	1
chr3	167098017	167098017	0.0717257014441276	1	0.160923772512945	1
chr4	174443242	174443366	0.0935268655725202	1	0.16134312866468	1
chr8	1765312	1765336	0.0936519226113838	1	0.161645729208397	1
chr18	47016218	47016218	0.0724851484724296	1	0.161962254732887	1
chr15	67323243	67323243	0.0729149483597444	1	0.162536660189765	1
chr17	113262	113262	0.0731211451904188	1	0.16280739395056	1
chr7	133811940	133812031	0.094127246474302	1	0.162840331885849	1
chr7	157350867	157350867	0.0732148710225435	1	0.162935128870341	1
chr13	114890515	114890515	0.0734540057885074	1	0.16324254959971	1
chr14	102026953	102027172	0.0943596865379713	1	0.163414469554636	1
chr13	113539522	113539522	0.0736489555193268	1	0.163506053082027	1
chr16	8995926	8995926	0.0739799416007729	1	0.163953794771491	1
chr11	1001560	1001560	0.0742538888186689	1	0.164307007264555	1
chr16	67208247	67208405	0.0948998151191014	1	0.164824641645976	1
chr13	50425353	50425353	0.0747300160458625	1	0.164923991028028	1
chr10	130279912	130279912	0.0747466189075531	1	0.164945146287279	1
chr4	3255128	3255174	0.0949488203398981	1	0.164949966472931	1
chr2	31806042	31806042	0.0747487612122874	1	0.164950769837206	1
chr12	114395548	114395548	0.0748566798132767	1	0.165094036466311	1
chr13	40108007	40108007	0.0749517445858604	1	0.165219629081358	1
chr17	76179594	76179594	0.0751801678281529	1	0.165522229625075	1
chr12	57559808	57559808	0.0751991807826696	1	0.165544456036693	1
chr8	23423757	23423757	0.075340572895132	1	0.165730300972392	1
chr7	120659	120659	0.0753547656639966	1	0.165747171622175	1
chr2	73869666	73869666	0.0755502509709996	1	0.166001838097462	1
chr6	54172183	54172378	0.0953531803584933	1	0.166024867873356	1
chr3	4630986	4630986	0.0757462718541862	1	0.166247131989537	1
chr5	109221111	109221175	0.0955272426181535	1	0.166490551364969	1
chr6	55761410	55761410	0.0759854066201501	1	0.166560979633109	1
chr12	9885998	9885998	0.0761758039534092	1	0.166798775458614	1
chr10	118897904	118897904	0.0766712119232112	1	0.16743584332897	1
chr13	112728576	112728799	0.0959029493109277	1	0.16756331046066	1
chr13	113425098	113425098	0.0769132923581848	1	0.167747280879716	1
chr12	122651623	122651623	0.0772908735676015	1	0.168214838887972	1
chr7	2121155	2121155	0.0775358996715847	1	0.168523866345892	1
chr14	73392937	73392937	0.0776628312270907	1	0.168676773346301	1
chr16	7489771	7489771	0.0780321110056621	1	0.169140582321273	1
chr21	42880554	42880557	0.096454057203821	1	0.169172984680379	1
chr14	95106927	95106927	0.0780653167290434	1	0.16917914380649	1
chr8	8559074	8559132	0.0964599485418403	1	0.169189319753978	1
chr11	70733251	70733251	0.0782283996769405	1	0.16938614400144	1
chr10	120516119	120516119	0.0783505110467944	1	0.169536908697115	1
chr5	137577632	137577858	0.096705510222007	1	0.169899493773391	1
chr10	124899755	124899755	0.0787647792247856	1	0.170059631052279	1
chr8	144850435	144850435	0.0788223536645194	1	0.170126845863317	1
chr21	31312333	31312535	0.0968308350489624	1	0.170300908122977	1
chr1	209982407	209982407	0.0792312660806749	1	0.170624128349761	1
chr7	1272512	1272515	0.0970134665275597	1	0.170863263115725	1
chr10	99531645	99531645	0.0795820684809131	1	0.171048036899057	1
chr6	148540308	148540308	0.0796093828662752	1	0.171079635893887	1
chr2	133176249	133176249	0.0798096883589303	1	0.171319038447943	1
chr15	22923741	22923741	0.0801481725069464	1	0.171718846068978	1
chr16	14397685	14397688	0.0973463271256483	1	0.17199065098214	1
chr2	145051829	145051829	0.0805161133450589	1	0.172163909877524	1
chr1	8120055	8120055	0.0806786607167723	1	0.172370106708199	1
chr19	50159969	50159969	0.0810656145094015	1	0.172820258490489	1
chr4	110223429	110223598	0.0976315214433992	1	0.172950671291188	1
chr14	89878619	89878619	0.0813548256485292	1	0.173164633976525	1
chr11	68550390	68550390	0.0817377626197816	1	0.173616392487366	1
chr7	157695878	157695878	0.0817439217458927	1	0.17362308718966	1
chr20	62552607	62552607	0.0820395597992232	1	0.173968801616155	1
chr5	150400395	150400531	0.097911895575498	1	0.173971211708981	1
chr11	2222912	2222912	0.0823084190433752	1	0.174281578107359	1
chr2	214148958	214148958	0.0824415097249923	1	0.174432342803034	1
chr9	136403935	136403935	0.0824937284028904	1	0.174488310514217	1
chr9	116812263	116812388	0.0980503420189508	1	0.174522855178058	1
chr2	202507231	202507231	0.0826878747694345	1	0.174715662604143	1
chr13	111089337	111089337	0.0827899020324045	1	0.174839648490639	1
chr19	35395973	35396203	0.0983858804979573	1	0.17579538419022	1
chr15	60706369	60706369	0.0836540542045944	1	0.175822966363673	1
chr8	125935564	125935564	0.0836714604305604	1	0.175843586046741	1
chr4	104641146	104641250	0.098409981426218	1	0.175898482605557	1
chr15	34491893	34491893	0.0839529057150263	1	0.176161450511689	1
chr10	111989324	111989324	0.0844250161208431	1	0.17669113535724	1
chr12	104676774	104676774	0.0844464391681859	1	0.176715236285501	1
chr3	182971025	182971069	0.0987481977861423	1	0.17737533393175	1
chr4	25656830	25656865	0.0987527501837026	1	0.177394882462451	1
chr2	27851430	27851430	0.0850679753292187	1	0.177399167071919	1
chr12	123258876	123258897	0.0987680141049344	1	0.177464507366315	1
chr10	1228949	1229050	0.0987696208334851	1	0.177470666492426	1
chr1	29190137	29190137	0.0858167108338493	1	0.178228239004085	1
chr11	43602920	43602965	0.0990084878113572	1	0.178592698597005	1
chr7	563891	563891	0.0862818587492797	1	0.178723111397704	1
chr5	139493486	139493486	0.0863273827248831	1	0.178772919982776	1
chr17	80043349	80043349	0.0864387825710656	1	0.178893156835987	1
chr10	134405295	134405295	0.0864792185729251	1	0.178936002930673	1
chr18	74961342	74961360	0.0991809433424667	1	0.179423912833905	1
chr7	154958660	154958660	0.0872065310302129	1	0.179704554754096	1
chr11	8714324	8714324	0.0872630343175795	1	0.179765610439023	1
chr1	114696462	114696462	0.087719345225981	1	0.180250039097061	1
chr11	123048161	123048161	0.0879448227992639	1	0.180484621465465	1
chr12	2113119	2113266	0.0994390910629473	1	0.180805163811331	1
chr2	233284112	233284112	0.0882562603500097	1	0.180808912844617	1
chr17	17721594	17721594	0.08828330694728	1	0.180837566170437	1
chr7	130353515	130353515	0.0882999098089707	1	0.180853633455945	1
chr1	53878650	53878650	0.0883336511085356	1	0.180887374755509	1
chr9	72132995	72132995	0.088727835179643	1	0.181305124178694	1
chr6	30782272	30782272	0.088914483479617	1	0.181492843631035	1
chr10	7517765	7517807	0.0995638803137191	1	0.181541045487556	1
chr14	97091902	97092096	0.0995751274135741	1	0.181618971822266	1
chr7	25989735	25989763	0.0996276138795639	1	0.182001641005426	1
chr11	131780329	131780332	0.0996626941195877	1	0.18221372917412	1
chr13	78493066	78493066	0.0897623005782081	1	0.182348426584288	1
chr11	119292737	119292737	0.0901548779207647	1	0.182739129410202	1
chr9	138660958	138660998	0.0997848054894416	1	0.183136794726503	1
chr6	5404958	5404958	0.0907006300518224	1	0.183280061355608	1
chr5	172661970	172661970	0.0907394593251312	1	0.183317016112274	1
chr17	43224158	43224158	0.0909453883677138	1	0.183510626902634	1
chr3	49697458	49697458	0.0909598489246701	1	0.18352348073104	1
chr2	198365119	198365119	0.0910300094047178	1	0.18359096333017	1
chr15	74345103	74345103	0.0910731232874952	1	0.183632202696305	1
chr5	72602175	72602175	0.0911336433962385	1	0.183690580500314	1
chr11	18300953	18300953	0.0911360534890646	1	0.183693526169323	1
chr5	78282669	78282669	0.0918181097588408	1	0.184343715656177	1
chr16	29193020	29193318	0.0999221807805273	1	0.184426997752722	1
chr10	855060	855060	0.0923274427094156	1	0.184820914035738	1
chr6	97247867	97247867	0.0925644351706453	1	0.18504773054948	1
chr19	34621907	34621907	0.0927395685826726	1	0.185212688014019	1
chr16	54964677	54964737	0.100005730665164	1	0.185396122856892	1
chr17	724273	724273	0.0940726177035779	1	0.186453885819442	1
chr9	103788959	103788959	0.0952824843022621	1	0.187543783353007	1
chr19	2583601	2583601	0.0954067379768503	1	0.187656254351557	1
chr4	186549051	186549051	0.095502873901801	1	0.187742749905203	1
chr17	77038216	77038216	0.0956059723171382	1	0.187832994492135	1
chr12	132263618	132263618	0.0963067737533393	1	0.188446764798506	1
chr8	72987499	72987499	0.0965089537626369	1	0.188623772727175	1
chr1	218101823	218101823	0.0966514170274665	1	0.188750168706498	1
chr17	32596886	32596886	0.0970900539218102	1	0.189122929730262	1
chr7	150095084	150095084	0.0972392118889343	1	0.189249057921493	1
chr4	8569129	8569129	0.0972609027243689	1	0.189268606452193	1
chr18	56963742	56963742	0.0976652627429641	1	0.18961914106434	1
chr7	148032668	148032668	0.0980010690100624	1	0.189908619991559	1
chr16	1152511	1152511	0.0980891712922596	1	0.189983332869167	1
chr1	161675579	161675579	0.0983363397009771	1	0.190193278733127	1
chr7	5812747	5812747	0.098504510622618	1	0.190338955455058	1
chr14	59947673	59947673	0.0996152956273418	1	0.191280498385773	1
chr3	115376349	115376349	0.099654928264926	1	0.191314239685338	1
chr12	120755460	120755460	0.0999923412605749	1	0.191606396493476	1
chr19	15083795	15083795	0.100571299115014	1	0.192110105894123	1
chr18	34917603	34917603	0.100693946061051	1	0.192212936521368	1
chr7	87105216	87105216	0.10086024246605	1	0.192353257481464	1
chr7	211932	211932	0.100982353835904	1	0.192461176082453	1
chr2	87036626	87036626	0.101151863698004	1	0.192603907135374	1
chr11	122047028	122047028	0.102026459605773	1	0.19334594793771	1
chr5	145484705	145484705	0.102337897156519	1	0.193607576903384	1
chr14	52490568	52490568	0.102586404505695	1	0.193822342952996	1
chr7	27209197	27209197	0.102681201490187	1	0.19390107265198	1
chr7	116200522	116200522	0.103083151415956	1	0.194245715926108	1
chr1	227544540	227544540	0.103833761437229	1	0.194885729465474	1
chr15	91476398	91476398	0.104070486110367	1	0.195089516203322	1
chr10	62704070	62704070	0.104117081238338	1	0.195131558933732	1
chr10	121346762	121346762	0.105240184495284	1	0.196096131640341	1
chr9	115771599	115771599	0.105343282910621	1	0.196182627193988	1
chr22	18832673	18832673	0.105426565007166	1	0.196253323250219	1
chr6	31519394	31519394	0.105680160330086	1	0.196469963816473	1
chr10	73936754	73936754	0.105863327384867	1	0.196627155426351	1
chr16	64479729	64479729	0.106460762617639	1	0.197133274919824	1
chr11	66610784	66610784	0.106576179285199	1	0.197231553149509	1
chr18	77678514	77678514	0.106618757591792	1	0.197266633389533	1
chr10	92720690	92720690	0.107451310769152	1	0.197978414137497	1
chr8	144917532	144917532	0.107481570823523	1	0.198003050641942	1
chr5	139494540	139494540	0.107661524421203	1	0.198158367735177	1
chr14	95877336	95877336	0.107850850602095	1	0.19831341704032	1
chr19	34625543	34625543	0.107852457330645	1	0.198315023768871	1
chr11	102576374	102576374	0.108151844417261	1	0.198576652734545	1
chr4	4869172	4869172	0.108197636180956	1	0.19861494643167	1
chr9	91997686	91997686	0.108365271526414	1	0.198757141908408	1
chr14	54417114	54417114	0.108457390629988	1	0.198834532666934	1
chr8	10049871	10049871	0.10903233166305	1	0.199317622384514	1
chr10	52002547	52002547	0.109371886963433	1	0.199606833523641	1
chr22	25817266	25817266	0.109848281978718	1	0.200014942575522	1
chr2	71017541	71017541	0.110209528114536	1	0.200318614271606	1
chr11	13300592	13300592	0.110224524247676	1	0.200331735888103	1
chr11	777775	777775	0.110467140258833	1	0.20053980723542	1
chr22	30640594	30640594	0.111131522514552	1	0.201101626651985	1
chr6	28415023	28415023	0.11133075685484	1	0.201266048540341	1
chr2	133189699	133189699	0.111461437443631	1	0.201379590691257	1
chr1	24921758	24921758	0.112208030643527	1	0.202004340309392	1
chr4	57528377	57528377	0.112278191123575	1	0.202061914749125	1
chr5	1875886	1875886	0.11228194015686	1	0.202065395994319	1
chr8	103551067	103551067	0.112606499324103	1	0.202340414364582	1
chr14	59932153	59932153	0.113106995267649	1	0.202765126278153	1
chr10	37107018	37107018	0.113255082082406	1	0.202895003502668	1
chr2	107502801	107502801	0.113275701765473	1	0.20291321309291	1
chr10	124214250	124214250	0.113886258614743	1	0.203428437381504	1
chr17	32569640	32569640	0.113907146085902	1	0.203446111395562	1
chr11	124439146	124439146	0.114162080349281	1	0.203660877445173	1
chr9	120510294	120510294	0.1141843067609	1	0.203679622611598	1
chr1	94559714	94559714	0.11435247768254	1	0.203818336843143	1
chr20	36530548	36530548	0.114472178959568	1	0.203915811708552	1
chr16	89557657	89557657	0.114556264420389	1	0.203985436612416	1
chr11	74861433	74861433	0.115257869220865	1	0.204576444930986	1
chr14	71577479	71577479	0.115674279703591	1	0.204927515119316	1
chr15	62899159	62899159	0.115864141460666	1	0.205091937007672	1
chr7	4876057	4876057	0.11593671203354	1	0.205150850387864	1
chr19	56349119	56349119	0.1160357936275	1	0.205231454603492	1
chr18	54814189	54814189	0.116578332301457	1	0.205692050121362	1
chr1	95088560	95088560	0.11713693826092	1	0.20616442831527	1
chr2	202163482	202163482	0.117869874268135	1	0.206788374569129	1
chr2	114715532	114715532	0.117942177052917	1	0.206850233618331	1
chr6	169248185	169248185	0.118246652113277	1	0.207108381338812	1
chr2	69812277	69812277	0.119083757688196	1	0.207824714484337	1
chr1	714177	714177	0.119758048103311	1	0.20839537090793	1
chr16	1939295	1939295	0.119923273355942	1	0.208533013987108	1
chr6	33037640	33037640	0.120368069376397	1	0.20890390049423	1
chr17	21193432	21193432	0.120413861140092	1	0.208942194191355	1
chr15	100171683	100171683	0.120435016399343	1	0.208959868205413	1
chr3	152879313	152879313	0.120572391690428	1	0.20907501708488	1
chr5	111963982	111963982	0.121308273366653	1	0.209697088822097	1
chr18	56117145	56117145	0.121461983731338	1	0.209826966046612	1
chr18	72916311	72916311	0.121965693131985	1	0.210251677960183	1
chr4	187581093	187581093	0.122136541934544	1	0.210397354682114	1
chr4	139621636	139621636	0.122388530528914	1	0.210611852943634	1
chr19	56904901	56904901	0.123043004625236	1	0.211168316598363	1
chr21	44513500	44513500	0.123207694301684	1	0.211313189956018	1
chr5	159542935	159542935	0.123333286916731	1	0.211422447497467	1
chr11	2950092	2950092	0.123368099368663	1	0.211451100823288	1
chr11	13989610	13989610	0.123889214995276	1	0.211887059836714	1
chr3	120318272	120318272	0.123973568244188	1	0.211959362621495	1
chr1	27964774	27964774	0.124212167433969	1	0.212159132537967	1
chr2	144664540	144664540	0.124491738201792	1	0.212397463939656	1
chr7	157260189	157260189	0.124602602471791	1	0.212489850831321	1
chr9	116817641	116817641	0.124768363300606	1	0.212631242943784	1
chr18	55102461	55102461	0.125137910867269	1	0.212941609342162	1
chr2	238410067	238410067	0.125532362726468	1	0.213270453118874	1
chr17	77136834	77136834	0.125591811682845	1	0.213322136220589	1
chr4	8643029	8643029	0.12566920244137	1	0.213386405362617	1
chr15	43621948	43621948	0.125763463849679	1	0.213462457180684	1
chr14	52733243	52733243	0.1264342730196	1	0.214025615537708	1
chr6	135203613	135203613	0.126756154305925	1	0.214293939205676	1
chr8	62052409	62052409	0.126816674414669	1	0.214342944426473	1
chr7	128550623	128550623	0.126847470045224	1	0.214367848719009	1
chr19	20845590	20845590	0.126904776696866	1	0.214415514999347	1
chr4	103172826	103172826	0.126992075614788	1	0.21449103124123	1
chr8	10464160	10464160	0.127021532304884	1	0.214515935533766	1
chr6	31087240	31087240	0.127486680220315	1	0.21490663835968	1
chr1	169396868	169396868	0.128776347670351	1	0.215986627733849	1
chr7	77827379	77827379	0.12886632446919	1	0.216062679551916	1
chr10	115465924	115465924	0.130248914387076	1	0.217223273141711	1
chr6	33244976	33244976	0.130574544706686	1	0.217497220359607	1
chr4	113444295	113444295	0.131166891965715	1	0.217994502846052	1
chr22	46508451	46508451	0.131332920582621	1	0.218138840627524	1
chr8	86934762	86934762	0.132011763395296	1	0.218708961474934	1
chr20	60500578	60500578	0.132190645840608	1	0.218861600687251	1
chr15	25981177	25981177	0.132284639460825	1	0.218938455869594	1
chr2	145143754	145143754	0.132443170011161	1	0.219073956644037	1
chr5	141660565	141660565	0.132472358913166	1	0.219099396512756	1
chr17	28592047	28592047	0.132587240004542	1	0.219195800225799	1
chr17	32595801	32595801	0.132691141784154	1	0.219283634719904	1
chr19	4327106	4327106	0.133385248518061	1	0.219863128150527	1
chr2	173099597	173099597	0.133452195541007	1	0.219920434802169	1
chr10	13933996	13933996	0.133601353508131	1	0.220042278383931	1
chr2	242056286	242056286	0.133729356216004	1	0.220143502282626	1
chr1	28763330	28763330	0.133786662867646	1	0.220190900774872	1
chr7	22481962	22481962	0.134181650303029	1	0.220518405611125	1
chr19	542653	542653	0.134559767088629	1	0.220833056618972	1
chr19	1719126	1719126	0.134823538359037	1	0.221051303913777	1
chr7	1479952	1479952	0.13483746333981	1	0.22106228322554	1
chr9	139607421	139607421	0.134959306921572	1	0.22116886288607	1
chr6	88053106	88053106	0.135650200198377	1	0.221745946223867	1
chr17	28444188	28444188	0.136134361068325	1	0.222148163937727	1
chr5	150077189	150077189	0.136321544944482	1	0.222305623335697	1
chr5	131825843	131825843	0.136893540308535	1	0.222781482774799	1
chr3	111730545	111730545	0.136895147037085	1	0.222783089503349	1
chr19	41125850	41125850	0.137123570279378	1	0.2229737546247	1
chr2	242248764	242248764	0.137160792824136	1	0.223006424771898	1
chr6	29691140	29691140	0.137233095608918	1	0.223068551609192	1
chr10	134411295	134411295	0.138145985213813	1	0.223834157763605	1
chr12	125813494	125813494	0.13842609155782	1	0.224069811284376	1
chr6	108436519	108436519	0.138596940360379	1	0.224212274549206	1
chr6	94129636	94129636	0.138799388157768	1	0.224380445470846	1
chr14	101507727	101507727	0.139477427606167	1	0.224946013920696	1
chr10	3503185	3503185	0.140049155182128	1	0.225430710366827	1
chr17	45928250	45928250	0.140734960485189	1	0.226009668221266	1
chr1	208309239	208309239	0.141380061998299	1	0.226551671319038	1
chr14	56586028	56586028	0.141447276809337	1	0.226607906818313	1
chr13	24913084	24913084	0.141479946956535	1	0.226635756779859	1
chr13	48877696	48877696	0.141876541120468	1	0.226961119311378	1
chr10	72138124	72138124	0.142019539961481	1	0.227085372985966	1
chr5	889694	889694	0.142283043443798	1	0.227308976042606	1
chr8	2034467	2034467	0.142386677435318	1	0.227393864867702	1
chr17	66016097	66016097	0.142581627166138	1	0.227556144451324	1
chr1	4481995	4481995	0.142864143602971	1	0.227795547005379	1
chr22	17565889	17565889	0.143317241054271	1	0.228179019552815	1
chr10	73652288	73652288	0.143611807955234	1	0.22842431344489	1
chr1	245836513	245836513	0.144147116350712	1	0.228869109465345	1
chr2	220199185	220199185	0.14442882942327	1	0.229098336071913	1
chr10	102415991	102415991	0.144570221535733	1	0.229216162832298	1
chr12	72875216	72875216	0.145077947757757	1	0.229637929076859	1
chr15	41953061	41953061	0.145141949111693	1	0.229690683330941	1
chr5	5139797	5139797	0.145406255958285	1	0.229912411870939	1
chr6	31529897	31529897	0.145883454337846	1	0.230309541611056	1
chr19	48076699	48076699	0.14592603264444	1	0.230343282910621	1
chr1	2254245	2254245	0.146567117336173	1	0.230886357160761	1
chr15	67417607	67417607	0.147300053343388	1	0.23149236161247	1
chr13	99084682	99084682	0.147742171482925	1	0.231857624569665	1
chr17	54991456	54991456	0.147882224654928	1	0.231976254694325	1
chr6	84562888	84562888	0.147882760231112	1	0.231976790270509	1
chr13	33924537	33924537	0.148440027250116	1	0.232439528093113	1
chr17	15686294	15686294	0.148694693725404	1	0.232653758566541	1
chr21	45393541	45393541	0.148832336804581	1	0.232769710810284	1
chr20	10412596	10412596	0.14900023993813	1	0.232909496194196	1
chr11	18414888	18414888	0.149022466349748	1	0.232928241360621	1
chr16	89609646	89609646	0.149355326947837	1	0.233200849638058	1
chr15	30861172	30861172	0.149609993423124	1	0.233412670018659	1
chr14	103687580	103687580	0.14999185924201	1	0.233725178721772	1
chr6	169978203	169978203	0.150076480279014	1	0.233796142566095	1
chr12	60673288	60673288	0.150884664740021	1	0.234461595974181	1
chr15	80696283	80696283	0.15131071559405	1	0.234814540679153	1
chr22	50118767	50118767	0.151559490731319	1	0.235019398569369	1
chr8	1279421	1279421	0.151791930794988	1	0.235212473783546	1
chr2	150845309	150845309	0.152275556088751	1	0.235614691497407	1
chr5	140053350	140053350	0.152721958837757	1	0.235987988097355	1
chr7	157209551	157209551	0.152780068853674	1	0.236036457741968	1
chr8	144437379	144437379	0.153006617579324	1	0.236222570465758	1
chr16	81673657	81673657	0.153802483788109	1	0.2368829359001	1
chr11	110890228	110890228	0.154575588009092	1	0.237525627320384	1
chr8	144870535	144870535	0.155162311718193	1	0.238010055978423	1
chr5	147473666	147473666	0.155165792963386	1	0.238012733859341	1
chr3	29456667	29456667	0.155190697255922	1	0.238033085754316	1
chr6	16962712	16962712	0.155449648340678	1	0.238245977287285	1
chr8	1327546	1327546	0.155983617795697	1	0.238694790129117	1
chr15	28054345	28054345	0.156205346335695	1	0.238876082667255	1
chr5	143585107	143585107	0.156455995989606	1	0.239088170835949	1
chr22	32026561	32026561	0.156467243089461	1	0.239098078995345	1
chr13	25081296	25081296	0.156997999087378	1	0.239540464922973	1
chr11	130779479	130779479	0.157754232658579	1	0.240172177031494	1
chr7	6568678	6568678	0.15845503409478	1	0.240756222859677	1
chr10	126686762	126686762	0.158656410739802	1	0.240920912536125	1
chr14	92585304	92585304	0.15878655575241	1	0.241032312382307	1
chr17	76897139	76897139	0.158786823540501	1	0.241032580170399	1
chr3	189829092	189829092	0.159253845972574	1	0.241418462810661	1
chr1	16553456	16553456	0.159511993693055	1	0.24163590674119	1
chr12	99118507	99118507	0.159962948839621	1	0.242009738917322	1
chr20	62423401	62423401	0.161054720889828	1	0.242920754005574	1
chr17	79495519	79495519	0.161398025223496	1	0.243200056985306	1
chr15	25315383	25315383	0.161471399160645	1	0.2432621838226	1
chr7	44364925	44364925	0.161685629634073	1	0.243445350877381	1
chr2	91671535	91671535	0.161850587098612	1	0.243582726168467	1
chr1	50889442	50889442	0.161892897617114	1	0.243617538620399	1
chr10	102107251	102107251	0.162084633890832	1	0.243780085992112	1
chr22	50468964	50468964	0.162105789150083	1	0.243798563370445	1
chr20	44682963	44682963	0.163628432239972	1	0.245060916435119	1
chr3	196757701	196757701	0.164002532204196	1	0.245370747257314	1
chr11	11426039	11426039	0.164072692684244	1	0.245428321697048	1
chr3	168308798	168308798	0.164316112059676	1	0.245626484884969	1
chr1	3669172	3669172	0.164326020219072	1	0.245635054103906	1
chr12	55368244	55368244	0.164471964729095	1	0.245755558745209	1
chr17	80899280	80899280	0.164473571457646	1	0.245756362109485	1
chr14	104552209	104552209	0.164929882366047	1	0.246131533226075	1
chr13	28494497	28494497	0.165541778155776	1	0.246644347421843	1
chr1	245836835	245836835	0.165646215511572	1	0.246731646339765	1
chr2	236867804	236867804	0.165651303485316	1	0.246736466525417	1
chr5	69371421	69371421	0.165793766750145	1	0.246857774530996	1
chr11	93754223	93754223	0.165802335969082	1	0.246865272597566	1
chr21	42688618	42688618	0.166029688059008	1	0.247051117533265	1
chr8	116663921	116663921	0.166132786474345	1	0.247136274146452	1
chr7	155623690	155623690	0.166856617686439	1	0.247733977167316	1
chr5	68856077	68856077	0.166895982535932	1	0.247768254043065	1
chr10	63240299	63240299	0.167674978094934	1	0.24841121325144	1
chr12	378771	378771	0.168074517927877	1	0.248742467120978	1
chr22	48971959	48971959	0.168151908686403	1	0.248806736263006	1
chr2	133423194	133423194	0.168303208958261	1	0.248929918785228	1
chr12	122020661	122020661	0.168834768320455	1	0.249370697984305	1
chr2	20306539	20306539	0.169029450263182	1	0.249536726601212	1
chr1	40226045	40226045	0.16934570799958	1	0.24979889114307	1
chr7	146130429	146130429	0.169508255371294	1	0.249931714036595	1
chr11	660455	660455	0.169740427646871	1	0.250123718098405	1
chr12	129468675	129468675	0.170157909281964	1	0.250469700312991	1
chr14	74704714	74704714	0.170330364813073	1	0.250617519339656	1
chr3	77087860	77087860	0.170792834847586	1	0.251007418801295	1
chr1	11709271	11709271	0.171040538832487	1	0.251211205539143	1
chr20	31611438	31611438	0.171286100512654	1	0.251419812462644	1
chr4	80885735	80885735	0.171473819964995	1	0.251569773794043	1
chr2	154728210	154728210	0.1716366351248	1	0.251705006780394	1
chr12	124086727	124086727	0.171712686942867	1	0.251769811498606	1
chr17	80860250	80860250	0.172582730453076	1	0.252499801836812	1
chr6	47631791	47631791	0.173024045228338	1	0.252866939310649	1
chr17	3704482	3704482	0.17336654619773	1	0.253150526899849	1
chr4	107956955	107956955	0.173545696431135	1	0.253300488231249	1
chr15	27216529	27216529	0.173898908924199	1	0.253597197436947	1
chr19	725168	725168	0.174797605760229	1	0.254334953629814	1
chr17	52981853	52981853	0.175728704955365	1	0.255107254486522	1
chr17	78719173	78719173	0.175800739952055	1	0.255166167866714	1
chr15	52526871	52526871	0.175942132064518	1	0.255282387898549	1
chr17	28443555	28443555	0.176142169769081	1	0.255445738634538	1
chr3	32400704	32400704	0.176199476420723	1	0.255489388093499	1
chr12	125509502	125509502	0.176248213853428	1	0.255529824095358	1
chr7	2050401	2050401	0.176421740536904	1	0.255671216207821	1
chr9	110231817	110231817	0.176594731644197	1	0.255814215048834	1
chr16	87248612	87248612	0.176881800478591	1	0.256052010874339	1
chr6	31096127	31096127	0.177992049907131	1	0.256975076426721	1
chr7	64035529	64035529	0.178310182160172	1	0.257234295299569	1
chr1	9341141	9341141	0.178629653353671	1	0.257496459841427	1
chr11	134603744	134603744	0.179189866041685	1	0.257955716418838	1
chr2	40739771	40739771	0.180039557656918	1	0.258658392371681	1
chr15	96898045	96898045	0.180357689909959	1	0.258922431430181	1
chr18	45660777	45660777	0.180990205382755	1	0.25944890281863	1
chr13	111981262	111981262	0.181323601557027	1	0.259725527917444	1
chr11	131239030	131239030	0.181341811147268	1	0.259740524050584	1
chr4	186048714	186048714	0.181549346918402	1	0.259913782945969	1
chr4	141317067	141317067	0.181611205967604	1	0.259964127107224	1
chr5	6585532	6585532	0.181720999085236	1	0.260059191879808	1
chr11	76838549	76838549	0.181807494638882	1	0.260132833605049	1
chr17	70117055	70117055	0.182260056513999	1	0.260514163847751	1
chr1	76081962	76081962	0.182333162663056	1	0.260573345016035	1
chr7	158809128	158809128	0.182428763011823	1	0.260654217019754	1
chr10	133836792	133836792	0.18256185369344	1	0.260763742349294	1
chr13	111115558	111115558	0.182613536795155	1	0.260805785079704	1
chr19	37407214	37407214	0.183170000449884	1	0.261269326266584	1
chr4	2061930	2061930	0.183770649139758	1	0.26176526981257	1
chr2	161214856	161214856	0.183839470679346	1	0.261824183192762	1
chr17	80849463	80849463	0.184022637734127	1	0.261968520974235	1
chr2	133171381	133171381	0.184049148755214	1	0.261991015173944	1
chr11	102079985	102079985	0.184352820451298	1	0.262245681649232	1
chr1	182858007	182858007	0.184638282557141	1	0.262478657289085	1
chr11	14128237	14128237	0.185272136970395	1	0.262999505127606	1
chr3	192127457	192127457	0.185622939370634	1	0.263290858571468	1
chr8	24857794	24857794	0.185647575875078	1	0.263310942678352	1
chr17	39597601	39597601	0.185903581290824	1	0.263519014025669	1
chr12	54389477	54389477	0.186873241971177	1	0.264305775439333	1
chr4	177365023	177365023	0.186983570664993	1	0.264397358966724	1
chr12	727334	727334	0.186992943248205	1	0.264404589245202	1
chr11	3862089	3862089	0.187729628288706	1	0.265017556187297	1
chr10	118935095	118935095	0.187900477091264	1	0.265158144935485	1
chr13	110424497	110424497	0.188039191322809	1	0.265274900543503	1
chr5	148033473	148033473	0.188142557526238	1	0.265360592732874	1
chr2	96874307	96874307	0.189246647828667	1	0.266263574178373	1
chr15	30930499	30930499	0.189836317206777	1	0.266746663895953	1
chr3	149421196	149421196	0.189938880045931	1	0.266832623873415	1
chr4	66536186	66536186	0.190346721309719	1	0.267168162352422	1
chr2	75427489	75427489	0.190406170266096	1	0.267219577666045	1
chr12	41830372	41830372	0.190513821078993	1	0.267307947736334	1
chr16	2765843	2765843	0.190617722858606	1	0.267393372137613	1
chr15	79383947	79383947	0.190749206811672	1	0.267501290738602	1
chr16	8960833	8960833	0.190752955844957	1	0.26750396861952	1
chr20	34700675	34700675	0.191141248578045	1	0.267821029720194	1
chr4	6564820	6564820	0.191891590811227	1	0.268439620212217	1
chr11	70961902	70961902	0.192085201601587	1	0.268600828643471	1
chr18	44526605	44526605	0.192396371364241	1	0.268860047516319	1
chr10	49765381	49765381	0.192538566840979	1	0.268977606488613	1
chr6	39895417	39895417	0.192701114212692	1	0.269111232746413	1
chr19	55526208	55526208	0.192871427439067	1	0.269252624858876	1
chr7	157987184	157987184	0.192876783200903	1	0.269256641680252	1
chr10	1209939	1209939	0.19299487774938	1	0.269355723274213	1
chr12	7146119	7146119	0.193022459922834	1	0.269377414109647	1
chr3	120151283	120151283	0.19329640714073	1	0.269609854173317	1
chr10	27532245	27532245	0.193827163138648	1	0.270045009822467	1
chr12	1906764	1906764	0.193836267933769	1	0.270053311253313	1
chr20	59864534	59864534	0.194021309505192	1	0.270205147101355	1
chr6	32939426	32939426	0.194519395355912	1	0.270613791729418	1
chr2	176963353	176963353	0.194593304869244	1	0.27067404405007	1
chr5	172661803	172661803	0.195741312418726	1	0.271609695642766	1
chr2	173189711	173189711	0.195879758862179	1	0.271720292124674	1
chr17	71189068	71189068	0.196208334850799	1	0.271986205699816	1
chr11	519077	519077	0.196225473288673	1	0.271999059528222	1
chr3	128212269	128212269	0.196798272017001	1	0.27246393965556	1
chr5	79331135	79331135	0.19704865388282	1	0.272671475426694	1
chr2	70995607	70995607	0.197049189459004	1	0.272671743214785	1
chr2	181938260	181938260	0.197309479484219	1	0.272891329450049	1
chr7	77672208	77672208	0.197311889577045	1	0.272893471754783	1
chr16	49308483	49308483	0.197669118891486	1	0.273197946815143	1
chr6	351609	351609	0.198475161047758	1	0.273868755985064	1
chr7	24324976	24324976	0.198576652734545	1	0.273952573657793	1
chr4	528497	528497	0.19865243676452	1	0.274011487037985	1
chr12	125020161	125020161	0.199283077720673	1	0.274530192571773	1
chr1	233089275	233089275	0.199950941221585	1	0.275079693736115	1
chr19	10665928	10665928	0.199992983951995	1	0.275114506188047	1
chr7	148096241	148096241	0.200605415317907	1	0.275624910290989	1
chr18	12308377	12308377	0.201026110410101	1	0.275976783843595	1
chr4	110621006	110621006	0.201536782301135	1	0.276392658750137	1
chr8	1822568	1822568	0.201751548350747	1	0.276568595526439	1
chr10	64320150	64320150	0.202708087414602	1	0.277350268966359	1
chr17	71533396	71533396	0.203081651802642	1	0.277655011814811	1
chr8	11659970	11659970	0.203326677906626	1	0.277862279797852	1
chr1	166917009	166917009	0.203886622806548	1	0.278319126282437	1
chr3	159756929	159756929	0.20397847412203	1	0.278388483398209	1
chr9	124924045	124924045	0.204372925981229	1	0.278719201691564	1
chr3	132379626	132379626	0.204436659547074	1	0.278770349217095	1
chr6	29691245	29691245	0.205381683722983	1	0.279548541411822	1
chr5	157166598	157166598	0.205471124945639	1	0.279620844196604	1
chr5	116075820	116075820	0.205656166517062	1	0.279775357925563	1
chr10	71338186	71338186	0.206321084348964	1	0.280320306692346	1
chr6	8435883	8435883	0.206422843823843	1	0.280405195517442	1
chr12	103359572	103359572	0.206902987872413	1	0.280801789681375	1
chr12	65518055	65518055	0.206920394098379	1	0.28081598245024	1
chr1	233464194	233464194	0.207426781379944	1	0.281236945330526	1
chr6	37662649	37662649	0.207576474923252	1	0.28136521582649	1
chr7	94144926	94144926	0.208185425043971	1	0.281876958869891	1
chr8	6189008	6189008	0.208365914217834	1	0.282028526929842	1
chr9	104500729	104500729	0.208506770754113	1	0.282142872445034	1
chr16	2131718	2131718	0.208551223577349	1	0.282181433930251	1
chr22	38380983	38380983	0.208639058071454	1	0.282256950172134	1
chr4	184961220	184961220	0.208857573154351	1	0.282434493676988	1
chr16	15219673	15219673	0.208860786611452	1	0.282436903769814	1
chr16	55090870	55090870	0.209080105058624	1	0.282617392943677	1
chr12	130527046	130527046	0.209834464113182	1	0.283238929104709	1
chr6	170452270	170452270	0.210302022121439	1	0.283614635797484	1
chr22	27068761	27068761	0.211061201361649	1	0.284242866660811	1
chr8	145026335	145026335	0.211289624603941	1	0.284429514960785	1
chr19	2340235	2340235	0.211585530445364	1	0.284670792031483	1
chr6	146350748	146350748	0.21197355539036	1	0.284988656496432	1
chr15	72565016	72565016	0.212197158447	1	0.285177714889232	1
chr5	172670879	172670879	0.212377915408955	1	0.285332764194376	1
chr15	60644157	60644157	0.212471373452988	1	0.285410690529085	1
chr15	60812923	60812923	0.212581702146804	1	0.285500399539833	1
chr13	48668791	48668791	0.213369534712835	1	0.286153534695696	1
chr18	43305784	43305784	0.213414790900346	1	0.286190489452363	1
chr20	25388089	25388089	0.214249218594348	1	0.286884596186269	1
chr12	128642467	128642467	0.214391414071086	1	0.287003761887113	1
chr1	6190318	6190318	0.214552354714249	1	0.287137120356822	1
chr9	139371233	139371233	0.214709546324126	1	0.287266997581338	1
chr4	141490354	141490354	0.214966355104148	1	0.28747881796194	1
chr1	115972057	115972057	0.215101052514316	1	0.287592360112857	1
chr14	96526884	96526884	0.215146844278011	1	0.287629047081431	1
chr5	3511975	3511975	0.215494968797332	1	0.287912634670631	1
chr2	144703795	144703795	0.215917002829985	1	0.288261026978044	1
chr10	55568997	55568997	0.216011799814476	1	0.288341095617487	1
chr5	96143244	96143244	0.216229511533098	1	0.28851703239379	1
chr9	140051205	140051205	0.216664399394156	1	0.288871316039221	1
chr4	44727930	44727930	0.217038767146472	1	0.289172309854388	1
chr20	6748712	6748712	0.217573004389582	1	0.289615766934383	1
chr2	242888631	242888631	0.217821243950667	1	0.289817946943681	1
chr1	246415176	246415176	0.217973883162984	1	0.289940326101627	1
chr1	227635322	227635322	0.218018068198129	1	0.289978887586844	1
chr2	200321744	200321744	0.218372887419744	1	0.290272918911623	1
chr20	25058429	25058429	0.218635587537785	1	0.290488220537419	1
chr6	157876915	157876915	0.218713513872494	1	0.290552221891355	1
chr15	102357765	102357765	0.218978088507178	1	0.290771004762343	1
chr19	2291613	2291613	0.219759761947098	1	0.291413963970719	1
chr8	1999014	1999014	0.21977502586833	1	0.291426550011033	1
chr2	144582331	144582331	0.220709606308659	1	0.292203135477209	1
chr7	154035993	154035993	0.221373720776286	1	0.292747013091624	1
chr5	77930038	77930038	0.221505472517444	1	0.292855467268797	1
chr7	99769432	99769432	0.221804859604059	1	0.293101832313239	1
chr13	44453235	44453235	0.221807001908794	1	0.293103171253698	1
chr13	114193155	114193155	0.222342845880455	1	0.293543147088501	1
chr2	144590694	144590694	0.222539402339825	1	0.293707033400673	1
chr10	82669655	82669655	0.223641885913704	1	0.294613763879457	1
chr1	232711080	232711080	0.22377631553578	1	0.294720879116171	1
chr10	131665884	131665884	0.224160055871307	1	0.295039814733487	1
chr4	4858482	4858482	0.224579679811134	1	0.295386332524256	1
chr12	132869185	132869185	0.224709824823742	1	0.295494518913337	1
chr3	118144311	118144311	0.224796855953572	1	0.295566018333844	1
chr14	35032169	35032169	0.225750449348418	1	0.29635759993316	1
chr10	124757121	124757121	0.225888092427595	1	0.296472213236444	1
chr1	27854642	27854642	0.226586215982879	1	0.297048225421873	1
chr1	28560936	28560936	0.226904080447827	1	0.297307444294721	1
chr19	40950431	40950431	0.226926842435629	1	0.297325118308779	1
chr10	72432540	72432540	0.226987094756281	1	0.2973733201653	1
chr7	20010777	20010777	0.227035832188986	1	0.297412685014793	1
chr22	30230951	30230951	0.227048150441208	1	0.297423664326556	1
chr13	21728944	21728944	0.227318080837727	1	0.297645392866554	1
chr10	37414597	37414597	0.227447154697967	1	0.297751704738992	1
chr10	8087295	8087295	0.227995852498034	1	0.298208283435486	1
chr18	14457820	14457820	0.22837771831692	1	0.298525880112342	1
chr12	52947004	52947004	0.228651933322907	1	0.298749215380891	1
chr12	122012243	122012243	0.228738964452738	1	0.298821518165673	1
chr14	96508538	96508538	0.229262490172177	1	0.299249443536345	1
chr21	45246164	45246164	0.229292214650365	1	0.299273276676514	1
chr2	238600061	238600061	0.229314441061983	1	0.299291218478664	1
chr11	86472904	86472904	0.229843322543258	1	0.299724499611172	1
chr2	37551081	37551081	0.230229740759704	1	0.300047719837956	1
chr17	10220829	10220829	0.230458967366272	1	0.300239188323582	1
chr2	79220217	79220217	0.230771743857477	1	0.300499746136889	1
chr16	71660113	71660113	0.232043469505363	1	0.301543048542483	1
chr12	119419786	119419786	0.232460683352364	1	0.301886085088059	1
chr2	204731519	204731519	0.232698479177869	1	0.302085587216439	1
chr4	103266423	103266423	0.23301072009289	1	0.302345073877379	1
chr12	132537251	132537251	0.233216649135473	1	0.302515922679938	1
chr4	7799666	7799666	0.233357505671752	1	0.302633749440323	1
chr4	174443865	174443865	0.233979309620876	1	0.303148170364642	1
chr2	169460068	169460068	0.234140785840223	1	0.303271352886863	1
chr1	18902165	18902165	0.234197556915681	1	0.30331741243865	1
chr1	156358408	156358408	0.234262897210077	1	0.303369095540364	1
chr1	50744322	50744322	0.234352606220824	1	0.303446218510798	1
chr11	1682006	1682006	0.234735275403985	1	0.303768367585216	1
chr12	62586003	62586003	0.234972803441398	1	0.303967869713595	1
chr12	89747474	89747474	0.235691546679749	1	0.304558610244073	1
chr1	224804222	224804222	0.235781255690497	1	0.304631984181222	1
chr7	158712251	158712251	0.236148393164334	1	0.304934316936847	1
chr17	9143754	9143754	0.236653173717349	1	0.305346442810104	1
chr4	41882564	41882564	0.236810365327226	1	0.305476855610803	1
chr7	101837148	101837148	0.237895710463231	1	0.306366447651713	1
chr15	72020908	72020908	0.237950071445863	1	0.306410900474949	1
chr7	1976457	1976457	0.23831265652214	1	0.306701986130719	1
chr16	978040	978040	0.239527343306476	1	0.307717706362859	1
chr1	161582581	161582581	0.239660969564277	1	0.307827499480491	1
chr9	34957718	34957718	0.240109514618016	1	0.308197582623338	1
chr14	103557891	103557891	0.240737745481344	1	0.308711467971473	1
chr2	166930521	166930521	0.240895740455497	1	0.308845362017366	1
chr1	101701963	101701963	0.240916895714748	1	0.30886250045524	1
chr5	114937919	114937919	0.240936444245448	1	0.308878299952655	1
chr2	219906245	219906245	0.240989466287622	1	0.308921413835432	1
chr10	122262397	122262397	0.241605378898727	1	0.309428336693181	1
chr8	12838022	12838022	0.241714100863992	1	0.309519116856296	1
chr7	6653510	6653510	0.24179791853672	1	0.309586063879243	1
chr21	48055212	48055212	0.242032768693216	1	0.309781013610062	1
chr5	141485167	141485167	0.242315820706232	1	0.310013453673731	1
chr6	32939335	32939335	0.242404994140797	1	0.310087363187064	1
chr7	57247873	57247873	0.243078748979727	1	0.310636328775223	1
chr8	65292498	65292498	0.243259773729774	1	0.310782808861429	1
chr2	144992352	144992352	0.243376797125884	1	0.310880551514931	1
chr16	88797506	88797506	0.243414555246826	1	0.310910275993119	1
chr5	177387597	177387597	0.24345874028197	1	0.310948301902152	1
chr5	6581849	6581849	0.2437152812739	1	0.311163603527947	1
chr1	91191583	91191583	0.243930047323512	1	0.311337665787608	1
chr10	118976677	118976677	0.244741177453528	1	0.312016776388374	1
chr8	58132446	58132446	0.244885247446908	1	0.312138352182044	1
chr11	99375907	99375907	0.244893281089662	1	0.312145850248614	1
chr4	103265947	103265947	0.245221321502098	1	0.31241524506895	1
chr5	160975347	160975347	0.245438765432628	1	0.312596002030905	1
chr11	86383300	86383300	0.245460724056154	1	0.312613676044963	1
chr8	22266134	22266134	0.245951579628396	1	0.313015090394548	1
chr6	3253892	3253892	0.245999245908734	1	0.313054990820224	1
chr11	81358293	81358293	0.246558923020564	1	0.313519067583287	1
chr6	31621094	31621094	0.24656133311339	1	0.31352094209993	1
chr7	157915171	157915171	0.246570437908511	1	0.313528172378408	1
chr2	133409467	133409467	0.246617033036481	1	0.313564323770799	1
chr4	117847410	117847410	0.246977743596116	1	0.313855945002753	1
chr6	170574923	170574923	0.246982831569859	1	0.31385996182413	1
chr11	32355022	32355022	0.248492620831343	1	0.315111067788949	1
chr2	31806234	31806234	0.248791740129867	1	0.315361181866676	1
chr3	122400006	122400006	0.249346597056045	1	0.315820706232179	1
chr6	158690902	158690902	0.249512625672951	1	0.315957813735173	1
chr15	40883034	40883034	0.249863963649373	1	0.316252112848044	1
chr7	158330926	158330926	0.250570656423594	1	0.316839104345237	1
chr4	13550574	13550574	0.250701069224293	1	0.316945951793859	1
chr6	128530306	128530306	0.250886378583808	1	0.317097787641901	1
chr8	11659832	11659832	0.251179338756221	1	0.317343081533976	1
chr16	936480	936480	0.251311358285471	1	0.317453945803975	1
chr1	101089253	101089253	0.251682512580685	1	0.317760295380977	1
chr10	50714434	50714434	0.251811318652833	1	0.317867678405783	1
chr6	99817927	99817927	0.251872106549668	1	0.317917219202763	1
chr17	20128997	20128997	0.252452671132658	1	0.318396292098966	1
chr14	21994644	21994644	0.253020381887242	1	0.318870812597609	1
chr6	171036378	171036378	0.253078224115067	1	0.318919550030314	1
chr1	55014160	55014160	0.253209975856226	1	0.319030414300313	1
chr13	74899532	74899532	0.2533966241562	1	0.319182785724538	1
chr6	158243833	158243833	0.254735832403216	1	0.32030374667675	1
chr4	143771325	143771325	0.255278906653356	1	0.320754701823316	1
chr6	2842139	2842139	0.255382808432968	1	0.320841197376962	1
chr1	8725074	8725074	0.255489655881591	1	0.320927425142517	1
chr6	153455993	153455993	0.255706028659753	1	0.321100148461718	1
chr7	37960902	37960902	0.255733075257023	1	0.321122374873336	1
chr2	216593517	216593517	0.256036211376924	1	0.321372221162972	1
chr14	94497084	94497084	0.256229822167284	1	0.321533161806134	1
chr6	33131893	33131893	0.256336937403998	1	0.321620460724056	1
chr6	149356915	149356915	0.256777181026892	1	0.321975815521855	1
chr1	183623675	183623675	0.256919108715538	1	0.32209364228224	1
chr5	75472143	75472143	0.257010156666745	1	0.322168355159848	1
chr7	27196302	27196302	0.257203767457106	1	0.32233063474347	1
chr1	158911377	158911377	0.25744290222307	1	0.322534421481318	1
chr2	144915087	144915087	0.257638119741981	1	0.322696165488756	1
chr17	63926873	63926873	0.25800552500391	1	0.322997962668198	1
chr6	32526342	32526342	0.258048638886687	1	0.323034917424864	1
chr1	108039344	108039344	0.259419981704718	1	0.32417301681495	1
chr20	59827212	59827212	0.259497372463243	1	0.324237821533162	1
chr2	77235218	77235218	0.259736507229207	1	0.324437591449633	1
chr4	10009916	10009916	0.260216115701594	1	0.324830704368374	1
chr2	232277212	232277212	0.26037598519239	1	0.324963795049991	1
chr13	108487481	108487481	0.260833902829342	1	0.325342447411775	1
chr10	27389534	27389534	0.260959763232481	1	0.325445813615204	1
chr2	68923942	68923942	0.261380458324675	1	0.325796080439258	1
chr8	24858463	24858463	0.261589333036267	1	0.325965590301358	1
chr15	91500193	91500193	0.261642087290349	1	0.32600790081986	1
chr14	24567446	24567446	0.262541587490654	1	0.326746995953186	1
chr16	68002838	68002838	0.262854363981859	1	0.327005411461759	1
chr14	69950116	69950116	0.262921043216713	1	0.327061914749125	1
chr2	145280784	145280784	0.263126972259296	1	0.32723517364451	1
chr3	36986992	36986992	0.263893113989893	1	0.327865546812572	1
chr7	65509382	65509382	0.264004246047983	1	0.327958737068513	1
chr10	129197384	129197384	0.264624175480465	1	0.328477174814209	1
chr19	15090275	15090275	0.264802254561502	1	0.3286274039337	1
chr5	134181600	134181600	0.264815108389908	1	0.328638115457371	1
chr10	1130179	1130179	0.265191886235049	1	0.328945268398649	1
chr13	95618902	95618902	0.266001945212699	1	0.329614470840019	1
chr22	25961141	25961141	0.266071570116563	1	0.329669099610743	1
chr3	178254242	178254242	0.268419000529149	1	0.331607885395266	1
chr13	53174588	53174588	0.270437319376932	1	0.333265493683415	1
chr3	188405973	188405973	0.270506676492704	1	0.333321193606506	1
chr8	86842690	86842690	0.271019758476564	1	0.333748047824811	1
chr16	26227882	26227882	0.271250591811683	1	0.333934963912877	1
chr1	151163316	151163316	0.271290760025451	1	0.333968973000533	1
chr4	30723855	30723855	0.271295044634919	1	0.33397298982191	1
chr6	31731881	31731881	0.27141072909057	1	0.334069393534953	1
chr5	31106255	31106255	0.271420637249966	1	0.334078230541982	1
chr8	143852587	143852587	0.271601126423829	1	0.33422497841628	1
chr17	26645922	26645922	0.272223465949137	1	0.334741809433425	1
chr13	19692744	19692744	0.272338614828605	1	0.334836338629825	1
chr16	22910629	22910629	0.273558925162869	1	0.335840543974018	1
chr10	8093239	8093239	0.273694693725404	1	0.335955692853486	1
chr3	172005396	172005396	0.274101196048733	1	0.336292838061043	1
chr19	36763026	36763026	0.274367912988151	1	0.336511085355848	1
chr7	100027339	100027339	0.274554025711941	1	0.336663724568165	1
chr17	21728665	21728665	0.275568942579806	1	0.337519843097601	1
chr2	197104914	197104914	0.27578558314606	1	0.337702206788107	1
chr5	140856330	140856330	0.27589805414461	1	0.337796200408323	1
chr2	241525392	241525392	0.276023914547749	1	0.337896620942743	1
chr10	3164740	3164740	0.276519858093734	1	0.338300713173246	1
chr19	51197463	51197463	0.276577164745376	1	0.338348379453584	1
chr4	44447076	44447076	0.276866643672596	1	0.338587514219548	1
chr3	115580805	115580805	0.276986612737715	1	0.338684989084957	1
chr10	133834730	133834730	0.277029458832401	1	0.338721943841624	1
chr2	144535905	144535905	0.277055166489212	1	0.338743099100875	1
chr6	26235699	26235699	0.277459794295899	1	0.339079440944157	1
chr11	43905825	43905825	0.277834429836307	1	0.339391146282994	1
chr6	31324941	31324941	0.277837643293408	1	0.33939355637582	1
chr6	28414780	28414780	0.278184696660361	1	0.339680357422122	1
chr6	41341074	41341074	0.278527197629754	1	0.33996367722323	1
chr1	166853578	166853578	0.278583433129029	1	0.340005987741732	1
chr7	157982427	157982427	0.278754281931588	1	0.340147915430378	1
chr10	119135296	119135296	0.278857915923108	1	0.340233875407841	1
chr8	128940078	128940078	0.279434195896629	1	0.340718036277788	1
chr6	132271971	132271971	0.279785533873051	1	0.341012603178752	1
chr1	40359924	40359924	0.279838288127133	1	0.34105732379008	1
chr4	8253470	8253470	0.280278531750027	1	0.341425264628192	1
chr19	57019016	57019016	0.280395822934229	1	0.341519526036501	1
chr6	32607509	32607509	0.281053778275745	1	0.342060190193814	1
chr20	39317034	39317034	0.281063418647049	1	0.342067688260384	1
chr10	124911034	124911034	0.281167320426661	1	0.34215257708548	1
chr10	46970594	46970594	0.281431359485161	1	0.342372431108836	1
chr11	113258750	113258750	0.281725658598033	1	0.342619599517553	1
chr20	34319899	34319899	0.281751634042936	1	0.342641558141079	1
chr12	6643545	6643545	0.282168044525662	1	0.342988343719941	1
chr17	12562530	12562530	0.282252665562666	1	0.343060378716631	1
chr22	17901078	17901078	0.282368082230225	1	0.343156514641582	1
chr17	38935921	38935921	0.282655954428894	1	0.343397523924188	1
chr1	223566669	223566669	0.282728525001767	1	0.343455633940105	1
chr6	42751375	42751375	0.282906336294713	1	0.343600507297761	1
chr2	121334614	121334614	0.283298110272994	1	0.343922388584087	1
chr13	111142037	111142037	0.283756831274221	1	0.344296756336402	1
chr12	54133422	54133422	0.284070678917793	1	0.344554100692607	1
chr1	86970291	86970291	0.284249293575014	1	0.344704062024007	1
chr11	17825098	17825098	0.284421749106123	1	0.344846793076928	1
chr4	113441944	113441944	0.284713370338077	1	0.345086463419076	1
chr14	105617173	105617173	0.284820485574791	1	0.345177243582191	1
chr1	150954826	150954826	0.284937508970901	1	0.345276592964243	1
chr20	16559406	16559406	0.285069260712059	1	0.345389063962792	1
chr3	175987813	175987813	0.285310805570849	1	0.345584549269795	1
chr17	80394529	80394529	0.285554492734373	1	0.345781641305349	1
chr6	13860661	13860661	0.285889763425288	1	0.346062015437448	1
chr2	84199313	84199313	0.286044277154248	1	0.346190018145321	1
chr19	5238768	5238768	0.286854871708081	1	0.346864844136619	1
chr6	31597708	31597708	0.288137576667731	1	0.347930640741923	1
chr1	100327026	100327026	0.288345380226956	1	0.348104970789675	1
chr2	191514902	191514902	0.288374301340869	1	0.348129607294119	1
chr7	2250050	2250050	0.28896718417608	1	0.348622337383003	1
chr1	171787181	171787181	0.289764389325324	1	0.349288594155364	1
chr15	27902080	27902080	0.289883287238076	1	0.349387140173141	1
chr10	133872448	133872448	0.290021465893437	1	0.349503895781159	1
chr8	2060983	2060983	0.290128581130151	1	0.349592801427632	1
chr6	29894820	29894820	0.290664425101813	1	0.350033312838618	1
chr15	45927086	45927086	0.291052450046809	1	0.350357872005861	1
chr8	6876781	6876781	0.291098509598596	1	0.350398843583904	1
chr13	97422029	97422029	0.291178846026132	1	0.35046712954731	1
chr16	31213730	31213730	0.292015416024868	1	0.351158022824115	1
chr12	130604404	130604404	0.29220474220576	1	0.351315482222084	1
chr11	93586725	93586725	0.292599461853051	1	0.351649681760632	1
chr1	227505854	227505854	0.292855467268797	1	0.351860698776958	1
chr4	146656091	146656091	0.293166101455268	1	0.35211750755698	1
chr15	43398338	43398338	0.293470308727535	1	0.352371906244176	1
chr17	3286290	3286290	0.293565105712027	1	0.352450903731252	1
chr14	58333164	58333164	0.293687752658065	1	0.352557215603691	1
chr20	13830102	13830102	0.294025165653714	1	0.35283464406678	1
chr6	29855302	29855302	0.294457375633854	1	0.353191070016946	1
chr6	26745279	26745279	0.294651254212307	1	0.35335522411721	1
chr12	20960446	20960446	0.294705615194939	1	0.353401551457089	1
chr3	177309023	177309023	0.2949937551817	1	0.35364925544199	1
chr18	70534767	70534767	0.295015713805226	1	0.353668536184598	1
chr19	50848024	50848024	0.295465330011333	1	0.354039690479812	1
chr16	89660342	89660342	0.295883615010701	1	0.354388350575316	1
chr7	157561593	157561593	0.296058480634636	1	0.354534027297247	1
chr17	2263865	2263865	0.296184608825867	1	0.354641945898236	1
chr11	128564874	128564874	0.296403391696855	1	0.354825916317292	1
chr10	111912029	111912029	0.296435258479778	1	0.354852962914563	1
chr4	74864165	74864165	0.296918615985449	1	0.355253038323689	1
chr1	227689829	227689829	0.297194437719988	1	0.355486817327818	1
chr8	38127091	38127091	0.297525156013342	1	0.355766120307549	1
chr17	32640541	32640541	0.298261037689567	1	0.356369446878341	1
chr6	105584551	105584551	0.298612375665989	1	0.356661068110294	1
chr2	163200405	163200405	0.298889000764803	1	0.356897792783432	1
chr6	159462137	159462137	0.299415472153252	1	0.357342588803887	1
chr17	3814718	3814718	0.2996942395568	1	0.357572886562822	1
chr6	32520615	32520615	0.300054414540251	1	0.357869327980428	1
chr15	83952774	83952774	0.300090030356458	1	0.357897713518157	1
chr16	34587120	34587120	0.300305064194161	1	0.358076595963469	1
chr4	184250312	184250312	0.300927135931378	1	0.35859583707344	1
chr13	108520252	108520252	0.301099323674395	1	0.358736425821627	1
chr11	93476721	93476721	0.301105215012415	1	0.358742049371555	1
chr12	57942004	57942004	0.301565007166009	1	0.359120969521431	1
chr15	81666528	81666528	0.301747638644607	1	0.359279767859859	1
chr6	170455498	170455498	0.30184270341719	1	0.359360639863578	1
chr7	27183973	27183973	0.302296068656582	1	0.35974652250384	1
chr6	31782961	31782961	0.302643925387811	1	0.360033323550142	1
chr15	49342629	49342629	0.303031414756623	1	0.360357882717385	1
chr5	1644520	1644520	0.303568329880652	1	0.360808302287767	1
chr1	22904862	22904862	0.303881374159949	1	0.361069931253441	1
chr1	38327818	38327818	0.303971350958788	1	0.361145715283416	1
chr8	145737513	145737513	0.304036959041276	1	0.361199005113681	1
chr2	206579059	206579059	0.304135772847144	1	0.361278538176941	1
chr21	47806332	47806332	0.304501303592431	1	0.361585691118219	1
chr15	28272345	28272345	0.305513274791286	1	0.362436453885819	1
chr7	76145562	76145562	0.305615302054256	1	0.36252348501565	1
chr7	147732939	147732939	0.305722952867154	1	0.362611587297847	1
chr16	2653250	2653250	0.305878805536572	1	0.362741196734271	1
chr19	9731681	9731681	0.306528459447243	1	0.363288823381971	1
chr1	39044452	39044452	0.306684847692845	1	0.363417897242211	1
chr19	49689673	49689673	0.30728870983982	1	0.363917054245298	1
chr8	145049280	145049280	0.307583008952691	1	0.364158599104088	1
chr8	24858119	24858119	0.307651027128005	1	0.364215637967638	1
chr10	107733752	107733752	0.308451177946258	1	0.364885911561376	1
chr8	143858636	143858636	0.308721643918961	1	0.365113263651301	1
chr16	49525225	49525225	0.309041650688644	1	0.365379712802627	1
chr1	70036106	70036106	0.309507334180258	1	0.365765595442889	1
chr8	75233153	75233153	0.309849835149651	1	0.366048111879722	1
chr4	155312410	155312410	0.309994708507306	1	0.366165135275832	1
chr16	31214134	31214134	0.310235717789913	1	0.36636731528513	1
chr9	139616839	139616839	0.310354883490757	1	0.36646479015054	1
chr5	43000640	43000640	0.31060285526375	1	0.366673932650224	1
chr4	7194519	7194519	0.310850291460559	1	0.366882807361816	1
chr2	26785332	26785332	0.310872785660269	1	0.366900749163966	1
chr14	26674164	26674164	0.311144054997247	1	0.367126762313432	1
chr5	146614386	146614386	0.311221445755773	1	0.367193441548286	1
chr15	37395115	37395115	0.311379708518018	1	0.36732144425616	1
chr3	48335857	48335857	0.311487894907099	1	0.367411688843091	1
chr2	74665089	74665089	0.31223663041173	1	0.368039919706419	1
chr1	165325673	165325673	0.31240774700238	1	0.368180240666514	1
chr14	27066404	27066404	0.312528251643683	1	0.368278518896199	1
chr18	56941246	56941246	0.312663484630035	1	0.368385366344821	1
chr2	80527798	80527798	0.312749176819406	1	0.368455794612961	1
chr4	121843785	121843785	0.3131503233809	1	0.368796153277619	1
chr3	129693489	129693489	0.313361340397226	1	0.368969947749188	1
chr19	937444	937444	0.313646266926885	1	0.369202387812857	1
chr11	2181072	2181072	0.313719105287851	1	0.369265318014426	1
chr7	157646605	157646605	0.313926373270892	1	0.369442325943096	1
chr16	71264579	71264579	0.314004835181785	1	0.369508737389859	1
chr19	646890	646890	0.31442258460497	1	0.369854987392537	1
chr17	41278906	41278906	0.31455460413422	1	0.369965851662536	1
chr6	84563387	84563387	0.314670020801779	1	0.370060916435119	1
chr20	43371550	43371550	0.314699477491875	1	0.370085285151472	1
chr1	24611021	24611021	0.315323155957642	1	0.370608543082819	1
chr6	30710200	30710200	0.315483561024621	1	0.370742972704895	1
chr6	169713842	169713842	0.315611831520586	1	0.370850087941609	1
chr1	156358231	156358231	0.315725105883412	1	0.37094327819755	1
chr7	105137683	105137683	0.315763399580537	1	0.370974341616198	1
chr6	32710933	32710933	0.316069213581355	1	0.371224455693925	1
chr12	4337382	4337382	0.316291477697537	1	0.371412978510541	1
chr10	1252782	1252782	0.316804559681396	1	0.371837154847929	1
chr4	5570715	5570715	0.316879540347096	1	0.371899281685223	1
chr13	100740987	100740987	0.316967910417385	1	0.371973191198555	1
chr12	11548867	11548867	0.316968178205477	1	0.371973458986647	1
chr13	112241077	112241077	0.317263280682624	1	0.372218217302538	1
chr2	144895454	144895454	0.317569094683442	1	0.372476097234927	1
chr14	95883697	95883697	0.317617028751872	1	0.372514390932053	1
chr1	64786354	64786354	0.317671657522596	1	0.372558040391013	1
chr11	96076288	96076288	0.317736997816991	1	0.372611865797462	1
chr1	76081408	76081408	0.318056736798583	1	0.372875369279779	1
chr4	122302421	122302421	0.318137876590393	1	0.372941780726541	1
chr1	46212773	46212773	0.318817790555435	1	0.373509759269217	1
chr3	160170242	160170242	0.318841355907512	1	0.37352823664755	1
chr17	70636625	70636625	0.319218937116929	1	0.373839941986388	1
chr21	35574541	35574541	0.319358186924657	1	0.37395134183257	1
chr9	138899186	138899186	0.319913311638927	1	0.374416489748001	1
chr18	29205358	29205358	0.320743990299644	1	0.375110060905724	1
chr19	47217696	47217696	0.321345710141885	1	0.375616448187289	1
chr1	92154087	92154087	0.32155806609867	1	0.375792384963592	1
chr12	133304604	133304604	0.321664110183017	1	0.375881826186248	1
chr15	69883108	69883108	0.321714989920456	1	0.375923065552383	1
chr5	140212752	140212752	0.321857720973378	1	0.376042231253227	1
chr3	114958699	114958699	0.322175317650234	1	0.376307073676002	1
chr12	128866668	128866668	0.32218522580963	1	0.376316178471123	1
chr16	68563886	68563886	0.322499876817478	1	0.37657084494641	1
chr2	31360693	31360693	0.322581819973564	1	0.376638863121724	1
chr2	144693693	144693693	0.32332680644491	1	0.377266826196959	1
chr2	144855085	144855085	0.323478642292952	1	0.377397238997658	1
chr17	21795257	21795257	0.323629406988627	1	0.377524438341256	1
chr22	21319303	21319303	0.323659667042998	1	0.377550145998068	1
chr19	56612697	56612697	0.323806682705388	1	0.377671454003646	1
chr19	55592930	55592930	0.324061616968767	1	0.377888897934176	1
chr11	68866745	68866745	0.324500521651203	1	0.378248805129534	1
chr2	98340655	98340655	0.324605494583182	1	0.378335032895089	1
chr1	225838196	225838196	0.324660391141998	1	0.378379485718325	1
chr22	24384315	24384315	0.324758937159775	1	0.378459286569677	1
chr1	86861232	86861232	0.325178561099602	1	0.378812766850833	1
chr11	111148753	111148753	0.32569137529537	1	0.379246851347617	1
chr5	140501403	140501403	0.325999599389015	1	0.379502053399088	1
chr2	37571901	37571901	0.326007097455585	1	0.379509015889474	1
chr13	98629067	98629067	0.326379055115074	1	0.379822595744954	1
chr6	170816044	170816044	0.326452429052223	1	0.37988499037034	1
chr17	75369484	75369484	0.326904455351156	1	0.380265249460675	1
chr6	33036504	33036504	0.327102082962893	1	0.380430206925214	1
chr1	169396834	169396834	0.327292748084244	1	0.38059007641601	1
chr3	192127330	192127330	0.327342288881224	1	0.380631851358328	1
chr4	16723393	16723393	0.327417269546924	1	0.380694781559898	1
chr7	101662116	101662116	0.328316769747229	1	0.381441642547886	1
chr10	5454459	5454459	0.328349172106335	1	0.381468689145156	1
chr16	6534829	6534829	0.328432186414789	1	0.381539652989479	1
chr19	41595975	41595975	0.328594198210319	1	0.381674350399647	1
chr21	37438281	37438281	0.328641864490656	1	0.381711840732497	1
chr2	238392110	238392110	0.329085321570652	1	0.382078174842059	1
chr10	94459330	94459330	0.329258580466037	1	0.382228136173458	1
chr8	55382640	55382640	0.329948402590475	1	0.382800399325602	1
chr8	124693396	124693396	0.330289029043225	1	0.383092020557556	1
chr3	116428385	116428385	0.330385164968176	1	0.383171821408908	1
chr7	140994128	140994128	0.330645990569575	1	0.38339113985608	1
chr5	146614596	146614596	0.330773725489356	1	0.383502004126079	1
chr3	22422855	22422855	0.330865309016746	1	0.383578323732238	1
chr5	75378102	75378102	0.33109989138515	1	0.383779968165352	1
chr21	19191892	19191892	0.331249584928458	1	0.383906631932766	1
chr5	176559881	176559881	0.331528084543914	1	0.384142285453537	1
chr12	121570677	121570677	0.33171500063198	1	0.384294924665854	1
chr16	3142911	3142911	0.331936729171978	1	0.384480234025369	1
chr6	150390190	150390190	0.332332787759728	1	0.384810952318724	1
chr4	185021514	185021514	0.332378043947239	1	0.384850317168216	1
chr12	115134148	115134148	0.332430530413229	1	0.384897180084278	1
chr7	79083445	79083445	0.332534432192842	1	0.384982604485558	1
chr2	8829827	8829827	0.332572458101875	1	0.385016345785123	1
chr14	58283338	58283338	0.332588793175474	1	0.385031609706354	1
chr5	77268734	77268734	0.332748127090086	1	0.38516443259988	1
chr1	228633460	228633460	0.332764997739869	1	0.385177554216377	1
chr1	6149477	6149477	0.333309143142375	1	0.385627438210576	1
chr4	7195053	7195053	0.333356006058438	1	0.385667338636252	1
chr2	133197577	133197577	0.333539173113219	1	0.385823459093762	1
chr4	13968277	13968277	0.333710557491961	1	0.385968332451418	1
chr17	46018875	46018875	0.333846326054496	1	0.386078393357142	1
chr1	35661778	35661778	0.334356194581254	1	0.386499088449336	1
chr21	22370237	22370237	0.334407074318694	1	0.386541131179746	1
chr2	145202065	145202065	0.33528568704784	1	0.387281297465439	1
chr3	71113124	71113124	0.335491883878514	1	0.387450807327539	1
chr1	54163070	54163070	0.335648272124117	1	0.38758148791633	1
chr7	32543574	32543574	0.336108064277711	1	0.387966299404225	1
chr20	61476314	61476314	0.336327114936791	1	0.388157232313668	1
chr9	117694183	117694183	0.336844213742028	1	0.388581408651055	1
chr19	40031368	40031368	0.336961772714322	1	0.388680758033107	1
chr12	131517623	131517623	0.337045054810867	1	0.388749579572696	1
chr2	145037160	145037160	0.337317663088304	1	0.388981751848273	1
chr1	150554875	150554875	0.337543408449678	1	0.389171613605349	1
chr11	2562647	2562647	0.337701671211923	1	0.389300955253681	1
chr10	118476176	118476176	0.338174049405832	1	0.389699959510441	1
chr6	169682364	169682364	0.338175388346291	1	0.389701298450899	1
chr15	53080209	53080209	0.338356413096337	1	0.389851259782299	1
chr5	180620978	180620978	0.338569036841215	1	0.390025322041959	1
chr2	287993	287993	0.339018920835413	1	0.39040049315855	1
chr12	108715309	108715309	0.339035791485196	1	0.390415221503598	1
chr2	31805915	31805915	0.339354727102511	1	0.390684616323934	1
chr9	35812293	35812293	0.339677411753112	1	0.390950262110984	1
chr17	41321218	41321218	0.340561915820278	1	0.391688553880035	1
chr8	86158163	86158163	0.34117140151718	1	0.392200029135344	1
chr3	45860640	45860640	0.341196573597808	1	0.392222523335054	1
chr6	167178260	167178260	0.34134091137928	1	0.392343831340633	1
chr5	95047004	95047004	0.3414804289751	1	0.392459248008192	1
chr10	43698008	43698008	0.341485249160752	1	0.392463532617661	1
chr16	1992734	1992734	0.341506404420003	1	0.392480671055535	1
chr3	16428391	16428391	0.341810611692271	1	0.392741228868842	1
chr13	94461196	94461196	0.3420085070921	1	0.392906454121473	1
chr1	2135358	2135358	0.342669140314533	1	0.393461846623835	1
chr10	132883127	132883127	0.34339323931472	1	0.394068922227911	1
chr22	49495056	49495056	0.343590599138365	1	0.394231737387716	1
chr5	23384883	23384883	0.343622198133196	1	0.394256373892161	1
chr6	32820976	32820976	0.34363639090206	1	0.394268959932475	1
chr2	219524515	219524515	0.344793235458571	1	0.395244511950847	1
chr7	43151725	43151725	0.345136807580331	1	0.395535329818525	1
chr1	11024967	11024967	0.345396294241271	1	0.395755719418064	1
chr7	158038720	158038720	0.345459760019024	1	0.395810348188788	1
chr16	49686567	49686567	0.345699162573079	1	0.396009582529076	1
chr19	41106295	41106295	0.345850195056846	1	0.396137317448858	1
chr4	183167912	183167912	0.345873760408923	1	0.39615713376765	1
chr10	102504226	102504226	0.34600979675955	1	0.396266926885282	1
chr4	48833388	48833388	0.346055320735153	1	0.396304417218132	1
chr2	45179787	45179787	0.346228579630538	1	0.396449558363879	1
chr18	70210494	70210494	0.34642245820899	1	0.39661317688796	1
chr1	21023132	21023132	0.346553674373965	1	0.3967227022175	1
chr11	5959923	5959923	0.346562511380994	1	0.396731003648345	1
chr12	101603581	101603581	0.346606428628047	1	0.396768493981195	1
chr5	170921824	170921824	0.34716958698507	1	0.39725238706305	1
chr2	144503739	144503739	0.347612776276974	1	0.397628361543916	1
chr16	34740934	34740934	0.347736226587287	1	0.397731459959253	1
chr16	15982508	15982508	0.34801713629557	1	0.397968720208575	1
chr19	58715677	58715677	0.348525130305685	1	0.398393432122146	1
chr8	74888080	74888080	0.348883698560585	1	0.398696300453954	1
chr6	4775203	4775203	0.349031785375343	1	0.398820554128543	1
chr5	146253830	146253830	0.349419006956063	1	0.399145648871969	1
chr16	31228202	31228202	0.349694828690602	1	0.399378088935639	1
chr15	44039057	44039057	0.349713573857027	1	0.399392549492595	1
chr1	60280488	60280488	0.349771951661036	1	0.399442625865759	1
chr4	141490075	141490075	0.350679753292187	1	0.400208499808264	1
chr19	59073902	59073902	0.350730097453442	1	0.400251881479133	1
chr2	240874769	240874769	0.35141536718032	1	0.40082762587647	1
chr19	51293054	51293054	0.352186864672752	1	0.401473530753856	1
chr6	150463965	150463965	0.352774927322312	1	0.401970277664117	1
chr19	34302382	34302382	0.353091452846802	1	0.40223029990124	1
chr5	960204	960204	0.353706829881723	1	0.402742310732732	1
chr4	120375747	120375747	0.353753692797786	1	0.402780604429858	1
chr1	1687481	1687481	0.353774044692761	1	0.40279747507964	1
chr10	1209315	1209315	0.354003539087421	1	0.402993228174735	1
chr1	77747987	77747987	0.354399329887079	1	0.403330373382292	1
chr1	180201139	180201139	0.354557860437416	1	0.403465606368644	1
chr3	195940754	195940754	0.354696306880869	1	0.403582629764754	1
chr6	160327345	160327345	0.354985785808088	1	0.403830065961563	1
chr1	3240227	3240227	0.355039343426445	1	0.403872108691973	1
chr4	2396482	2396482	0.355316236313351	1	0.404106691060377	1
chr1	227971215	227971215	0.35532212765137	1	0.404111243457937	1
chr11	69063136	69063136	0.35535667231521	1	0.404140967936125	1
chr8	38126881	38126881	0.355583756617044	1	0.404336453243128	1
chr16	65105516	65105516	0.355659005070835	1	0.404400454597065	1
chr12	133007812	133007812	0.356038996373078	1	0.404728227221409	1
chr15	58358384	58358384	0.356219217758849	1	0.40488140200991	1
chr17	32561989	32561989	0.356542973561817	1	0.405149993465971	1
chr12	62586425	62586425	0.357133981880387	1	0.405641116826304	1
chr8	41518004	41518004	0.35725448652169	1	0.405741537360723	1
chr10	78483672	78483672	0.357263859104902	1	0.405749303215385	1
chr7	138720989	138720989	0.357570476469996	1	0.406005308631132	1
chr1	206224005	206224005	0.357668486911589	1	0.406089661880044	1
chr6	152892780	152892780	0.35780961123596	1	0.406208559792796	1
chr10	134893401	134893401	0.3578995880348	1	0.406286218339414	1
chr2	8724060	8724060	0.358195493876222	1	0.406534457900499	1
chr19	2216482	2216482	0.358741781583463	1	0.406983806318514	1
chr17	41116483	41116483	0.358867909774694	1	0.407090118190952	1
chr5	81402204	81402204	0.359488106995268	1	0.407611769393749	1
chr7	65958667	65958667	0.359917371306399	1	0.407970873224833	1
chr7	12609460	12609460	0.360009490409973	1	0.408051209652368	1
chr6	167786059	167786059	0.360452947489969	1	0.408425577404683	1
chr7	63358554	63358554	0.360512932022528	1	0.408474314837388	1
chr6	168454303	168454303	0.36057023867417	1	0.408522784482001	1
chr18	43651835	43651835	0.360689672163106	1	0.408618920406952	1
chr9	120507431	120507431	0.360861592118032	1	0.408761383671782	1
chr11	31837960	31837960	0.361114651864769	1	0.408970526171466	1
chr17	79958141	79958141	0.361446976886674	1	0.409252239244023	1
chr2	237072998	237072998	0.361625055967711	1	0.409405414032524	1
chr21	27945125	27945125	0.361637374219933	1	0.409415054403829	1
chr11	5463768	5463768	0.361689592897831	1	0.409458436074698	1
chr15	89248793	89248793	0.361956309837249	1	0.409685788164623	1
chr8	55366610	55366610	0.362162774456015	1	0.409863599457568	1
chr16	88482341	88482341	0.362932129643713	1	0.410509772123045	1
chr10	21808126	21808126	0.36361124024448	1	0.411079357394272	1
chr10	14188049	14188049	0.363728531428682	1	0.411177635623957	1
chr6	1101607	1101607	0.363731744885783	1	0.411180849081058	1
chr10	115611817	115611817	0.364810930895676	1	0.412095345414504	1
chr22	41753602	41753602	0.365429253599608	1	0.412629047081431	1
chr1	57432150	57432150	0.365624471118519	1	0.412795611274521	1
chr22	48899955	48899955	0.365965900935544	1	0.41308053780418	1
chr5	169960825	169960825	0.366925117880318	1	0.413882295350984	1
chr5	140529580	140529580	0.367010542281597	1	0.413953526983399	1
chr19	52840042	52840042	0.367072936906983	1	0.414006816813664	1
chr9	16868891	16868891	0.367340457210676	1	0.414234436691682	1
chr12	75728471	75728471	0.367377144179251	1	0.414265500110329	1
chr19	36036387	36036387	0.36746551424954	1	0.414339409623661	1
chr13	95958190	95958190	0.367568612664877	1	0.414427244117767	1
chr18	55107176	55107176	0.367666890894562	1	0.414509722850037	1
chr16	83982669	83982669	0.367751244143474	1	0.414582025634818	1
chr11	65734958	65734958	0.367770792674175	1	0.414597557344142	1
chr10	1196719	1196719	0.36786157283729	1	0.414674948102668	1
chr4	158144318	158144318	0.369553190213095	1	0.416110827850818	1
chr1	39044196	39044196	0.370333256924465	1	0.416776816835088	1
chr7	134455275	134455275	0.371215350898804	1	0.417522071094525	1
chr5	90679543	90679543	0.372514926508236	1	0.418632320523065	1
chr2	145196972	145196972	0.372572233159878	1	0.418679719015311	1
chr11	65641035	65641035	0.372673992634756	1	0.418761126595214	1
chr12	29302016	29302016	0.373118520867119	1	0.419135226559437	1
chr4	165304842	165304842	0.373412284403807	1	0.419383466120522	1
chr8	56813677	56813677	0.373981066310758	1	0.41985878998344	1
chr9	96721468	96721468	0.374369626831938	1	0.420188704912519	1
chr1	237413813	237413813	0.374434699338242	1	0.420243869259427	1
chr16	1723424	1723424	0.37467597640894	1	0.420451672818652	1
chr7	112726396	112726396	0.374858875675629	1	0.420609667792805	1
chr6	32939364	32939364	0.375008837007029	1	0.420738473864953	1
chr14	105840286	105840286	0.375174865623936	1	0.42087906261314	1
chr16	89626662	89626662	0.375599309749415	1	0.421240040960867	1
chr13	34318562	34318562	0.375968053951802	1	0.421553620816347	1
chr14	96180598	96180598	0.376341350551751	1	0.42187362758603	1
chr4	6008765	6008765	0.376470156623899	1	0.421982617339386	1
chr6	30955979	30955979	0.376611013160178	1	0.422102854192597	1
chr1	209405752	209405752	0.376709291389863	1	0.422188278593877	1
chr5	96789385	96789385	0.376726697615829	1	0.422202471362741	1
chr10	135030439	135030439	0.376778916293727	1	0.422247727550253	1
chr2	1788254	1788254	0.376923789651383	1	0.422372784589117	1
chr7	91510500	91510500	0.377530597467367	1	0.422887205513435	1
chr10	49909285	49909285	0.377732777476665	1	0.423053234130342	1
chr11	810109	810109	0.378161773999704	1	0.423421710544638	1
chr13	112849476	112849476	0.378282278641008	1	0.423523202231425	1
chr19	1737123	1737123	0.378367435254195	1	0.423595237228115	1
chr3	42543469	42543469	0.379197578338728	1	0.424305946823712	1
chr4	164249904	164249904	0.379505802432373	1	0.424568111365569	1
chr1	86861147	86861147	0.379644516663917	1	0.424685670337863	1
chr4	28829667	28829667	0.380145280395555	1	0.42510529427769	1
chr7	171613	171613	0.380235257194395	1	0.425183756188583	1
chr15	77925481	77925481	0.380364331054635	1	0.425292745941939	1
chr6	107017926	107017926	0.380549104837967	1	0.42544431400189	1
chr17	3599498	3599498	0.380895087052553	1	0.425736203021935	1
chr11	66624841	66624841	0.381033265707914	1	0.425850816325219	1
chr5	22853134	22853134	0.381449408402548	1	0.4262034932421	1
chr6	143586006	143586006	0.381574197653319	1	0.426310340690722	1
chr7	21926971	21926971	0.382086744060996	1	0.426746031916056	1
chr2	9409242	9409242	0.382358013397974	1	0.426979007555909	1
chr15	44038414	44038414	0.383022663441784	1	0.427542701489116	1
chr1	78602941	78602941	0.383118799366735	1	0.427625448009478	1
chr4	1342161	1342161	0.383330619747337	1	0.427800849209597	1
chr3	108021293	108021293	0.383919485761172	1	0.428294382662756	1
chr12	27691111	27691111	0.384385704828969	1	0.428694458071883	1
chr18	9704392	9704392	0.384431764380756	1	0.428733287345192	1
chr9	131155819	131155819	0.384560838240996	1	0.428840134793814	1
chr6	88032386	88032386	0.384583600228798	1	0.428859147748331	1
chr3	181442713	181442713	0.3856070863156	1	0.429737760477477	1
chr11	6477831	6477831	0.386182562924846	1	0.430219243466506	1
chr7	30029442	30029442	0.386600580136122	1	0.43057834729759	1
chr1	56163457	56163457	0.387087954463171	1	0.430992615475581	1
chr2	144888877	144888877	0.387343959878917	1	0.43121755747268	1
chr10	131686486	131686486	0.387450539539447	1	0.431308069847704	1
chr3	159600838	159600838	0.387696636795798	1	0.431515337830745	1
chr15	31775895	31775895	0.387699582464807	1	0.431518283499755	1
chr7	44058904	44058904	0.387900691321738	1	0.431695559216516	1
chr10	99080932	99080932	0.388152679916107	1	0.431909521901852	1
chr1	21763130	21763130	0.388328081116226	1	0.432058144292793	1
chr3	96534005	96534005	0.388622915805282	1	0.432309597310979	1
chr17	59529618	59529618	0.38898121627209	1	0.432611662278512	1
chr17	3512736	3512736	0.389092080542089	1	0.432710743872473	1
chr8	92570895	92570895	0.390160019452127	1	0.433627114722561	1
chr9	98637332	98637332	0.390615526996253	1	0.434012729574731	1
chr14	104797641	104797641	0.390621150546181	1	0.434017817548475	1
chr10	134956732	134956732	0.390829757469681	1	0.434196967781879	1
chr12	52473731	52473731	0.391358638950956	1	0.434651939749822	1
chr7	98246633	98246633	0.392754618273431	1	0.43582645832039	1
chr7	157867695	157867695	0.392916630068961	1	0.43596597591621	1
chr12	121570875	121570875	0.39305454093623	1	0.436080589219494	1
chr1	248512094	248512094	0.393145856675529	1	0.436160390070846	1
chr2	71787431	71787431	0.393362765029874	1	0.436345431642269	1
chr17	57784647	57784647	0.393712496277746	1	0.436645086516977	1
chr7	127720749	127720749	0.394043750147283	1	0.436916891430138	1
chr11	131934835	131934835	0.394091148639529	1	0.436955452915355	1
chr4	107237688	107237688	0.394209243188007	1	0.437051588840306	1
chr1	20465218	20465218	0.394370451619261	1	0.437187625190933	1
chr18	54306261	54306261	0.394662608427398	1	0.437436400328201	1
chr4	164092065	164092065	0.394690993965128	1	0.437460501256462	1
chr2	5836231	5836231	0.395142752475969	1	0.437846651684816	1
chr7	24323840	24323840	0.395525153871038	1	0.438171746428242	1
chr4	5570245	5570245	0.396125266984727	1	0.438690719750122	1
chr6	35109722	35109722	0.396287546568349	1	0.438825952736473	1
chr1	229374634	229374634	0.396397339685981	1	0.438919678568598	1
chr17	14936230	14936230	0.39647526602069	1	0.438985018862993	1
chr1	167127353	167127353	0.397000130680589	1	0.439429814883448	1
chr4	141489114	141489114	0.397124652143269	1	0.439533181086877	1
chr4	2439700	2439700	0.397336740311962	1	0.439716348141658	1
chr19	34311482	34311482	0.397521246307202	1	0.439876217632453	1
chr8	63160761	63160761	0.397714053733287	1	0.440041978461268	1
chr12	24689930	24689930	0.398042897509999	1	0.440319674712449	1
chr4	41540229	41540229	0.398611143840767	1	0.440802228853846	1
chr10	129535786	129535786	0.39924473046593	1	0.441338876189783	1
chr7	131874478	131874478	0.399292396746268	1	0.441381186708285	1
chr15	81426610	81426610	0.399509305100613	1	0.441569173948718	1
chr13	90053523	90053523	0.399688990910201	1	0.441724491041953	1
chr2	239362030	239362030	0.399839755605876	1	0.441851958173642	1
chr3	147133884	147133884	0.400014889017903	1	0.442003258445501	1
chr11	2295852	2295852	0.400714083725554	1	0.442602300406824	1
chr6	292329	292329	0.400816914352799	1	0.442687992596195	1
chr12	113408421	113408421	0.400864580633137	1	0.442730570902789	1
chr6	49928115	49928115	0.401214311881008	1	0.443026744532303	1
chr19	58521223	58521223	0.401395604419146	1	0.443182597201722	1
chr2	144695078	144695078	0.401631793516101	1	0.443380492601551	1
chr12	132896743	132896743	0.401660982418105	1	0.443405664682178	1
chr6	1080885	1080885	0.401906008522088	1	0.443615610546138	1
chr5	172671526	172671526	0.402257882074694	1	0.443917407725579	1
chr11	2292510	2292510	0.40235937376148	1	0.444006581160144	1
chr15	99395633	99395633	0.402798010655824	1	0.444375593150623	1
chr13	22252817	22252817	0.402861744221669	1	0.444428347404705	1
chr14	103433986	103433986	0.403304665725481	1	0.444808338706948	1
chr1	10737562	10737562	0.403352867582002	1	0.444848239132624	1
chr2	31361757	31361757	0.403481405866059	1	0.444956157733613	1
chr8	119122878	119122878	0.40408473243685	1	0.445476202207859	1
chr19	3191030	3191030	0.404250493265665	1	0.445620004413148	1
chr1	16010646	16010646	0.404516139052716	1	0.445850837748266	1
chr3	33141679	33141679	0.404661280198463	1	0.445972681330028	1
chr1	60280322	60280322	0.40476732428281	1	0.44606292591696	1
chr2	214149425	214149425	0.40480186894665	1	0.446092382607056	1
chr8	139095979	139095979	0.404880330857543	1	0.446160132994278	1
chr3	167098119	167098119	0.405165525175294	1	0.44639899997215	1
chr11	1103876	1103876	0.405201408779593	1	0.446429260026522	1
chr14	97685945	97685945	0.405305578347298	1	0.446517897884903	1
chr19	48362237	48362237	0.40583553098094	1	0.446969656395744	1
chr4	66321852	66321852	0.406007718723958	1	0.447115600905766	1
chr8	56805218	56805218	0.40603503310932	1	0.447140505198302	1
chr11	58612853	58612853	0.406819116642066	1	0.447822025891895	1
chr3	49027210	49027210	0.407002551484939	1	0.447978949713681	1
chr12	8995965	8995965	0.407149567147328	1	0.448103203388269	1
chr10	70805603	70805603	0.407196965639574	1	0.44814390717822	1
chr7	156813185	156813185	0.407405304774983	1	0.448319576166431	1
chr22	34317552	34317552	0.407755571599038	1	0.448613875279303	1
chr13	28194831	28194831	0.407805647972201	1	0.448654579069254	1
chr7	101006308	101006308	0.408159128253358	1	0.448957715189155	1
chr13	66583583	66583583	0.40819849310285	1	0.448992259852995	1
chr1	228652478	228652478	0.408359969322196	1	0.449128831779805	1
chr11	16627327	16627327	0.408423167311857	1	0.449182657186254	1
chr15	29763183	29763183	0.409115399529121	1	0.449770452047722	1
chr12	94995915	94995915	0.409225728222937	1	0.44986765912504	1
chr11	125774406	125774406	0.409876988862158	1	0.450424658355953	1
chr15	70391035	70391035	0.410267156111888	1	0.4507588578945	1
chr11	129685560	129685560	0.410651164235508	1	0.451085023790294	1
chr19	617195	617195	0.410672051706667	1	0.451101626651985	1
chr8	1249158	1249158	0.410774882333912	1	0.451189193357998	1
chr5	139076670	139076670	0.410945463348379	1	0.451336209020388	1
chr14	99712380	99712380	0.411088462189393	1	0.451455642509324	1
chr6	33128825	33128825	0.411124613581784	1	0.451486973716063	1
chr3	16650168	16650168	0.411183794750068	1	0.451537853453502	1
chr5	96298493	96298493	0.411284750860671	1	0.451625687947608	1
chr12	121905749	121905749	0.411685361845981	1	0.451976758135938	1
chr5	140892370	140892370	0.411918605273926	1	0.452180544873786	1
chr16	66458043	66458043	0.411960915792428	1	0.452217499630452	1
chr13	32480222	32480222	0.411969752799457	1	0.452225265485114	1
chr5	159414197	159414197	0.412473997776288	1	0.452653190855786	1
chr2	144911452	144911452	0.412821318931333	1	0.45295231015431	1
chr5	2038528	2038528	0.41324094287116	1	0.453315698594862	1
chr6	131571435	131571435	0.413801155559174	1	0.453802001769544	1
chr17	78809403	78809403	0.413914162133907	1	0.453894656449301	1
chr7	88265165	88265165	0.414040290325138	1	0.454002039474107	1
chr11	120039306	120039306	0.41434824663069	1	0.454267685261158	1
chr12	109915468	109915468	0.416175096992847	1	0.455833442233824	1
chr10	134610598	134610598	0.416245257472894	1	0.455891820037833	1
chr7	54636856	54636856	0.416377009214053	1	0.456006165553025	1
chr13	79233506	79233506	0.416471538410453	1	0.456086234192469	1
chr3	141762780	141762780	0.417108606280809	1	0.45663707429727	1
chr19	57276642	57276642	0.417541084049042	1	0.457008228592484	1
chr6	32145753	32145753	0.417671764637833	1	0.457122306319585	1
chr1	202430474	202430474	0.417841274499933	1	0.45727307101526	1
chr2	225441832	225441832	0.418000876202636	1	0.457408304001611	1
chr22	22337171	22337171	0.418078534749254	1	0.457476322176924	1
chr3	16554619	16554619	0.418715334831518	1	0.458023413248441	1
chr3	44724736	44724736	0.418787905404392	1	0.458086075661919	1
chr8	129082086	129082086	0.418915372536082	1	0.458193994262908	1
chr5	176170566	176170566	0.418981248406661	1	0.458250229762183	1
chr10	122216260	122216260	0.419089434795742	1	0.458341813289573	1
chr14	98419775	98419775	0.419123979459582	1	0.45837126997967	1
chr2	237079099	237079099	0.419287062407479	1	0.458509448635031	1
chr20	57465773	57465773	0.41982879771716	1	0.458979684524205	1
chr2	73143534	73143534	0.420147733334476	1	0.459251489437366	1
chr15	28352098	28352098	0.420203433257567	1	0.45929995908198	1
chr6	29943414	29943414	0.420811312225919	1	0.459822413649052	1
chr3	142720237	142720237	0.420946009636087	1	0.459939437045162	1
chr5	95768997	95768997	0.421093293086568	1	0.460065297448301	1
chr3	62861055	62861055	0.421261999584393	1	0.460205886196488	1
chr1	228509696	228509696	0.42135759993316	1	0.460288364928758	1
chr7	158656429	158656429	0.421825961305692	1	0.460690047066435	1
chr4	139477187	139477187	0.422072594138226	1	0.460902670811312	1
chr3	38179985	38179985	0.422518729099139	1	0.46128185874928	1
chr3	49894282	49894282	0.422623434243027	1	0.461372371124303	1
chr2	111877065	111877065	0.422704574034838	1	0.461441728240075	1
chr18	10453969	10453969	0.422819990702397	1	0.461541880986403	1
chr21	22369310	22369310	0.423518649833864	1	0.462138245066808	1
chr7	157414580	157414580	0.424318532864026	1	0.46281815903185	1
chr11	36398442	36398442	0.424615242069723	1	0.463073361083321	1
chr1	1562535	1562535	0.424647376640738	1	0.463099872104407	1
chr7	158103582	158103582	0.425227405647544	1	0.463600100259862	1
chr16	982031	982031	0.425239188323582	1	0.463610276207349	1
chr15	45670526	45670526	0.425290335849113	1	0.463652051149668	1
chr3	39388759	39388759	0.425352730474499	1	0.463705073191841	1
chr6	167529765	167529765	0.425982568066377	1	0.46424948638244	1
chr1	119549263	119549263	0.427847712125659	1	0.465851126959405	1
chr7	27205262	27205262	0.428046946465947	1	0.466020369033414	1
chr15	25101627	25101627	0.42823198803737	1	0.466174882762373	1
chr5	118690955	118690955	0.428432561318117	1	0.466347606081575	1
chr11	19735701	19735701	0.428720165728694	1	0.466592364397466	1
chr6	74230764	74230764	0.428735161861834	1	0.466605218225872	1
chr10	102626509	102626509	0.428848168436567	1	0.466699211846088	1
chr12	20848285	20848285	0.429084893109705	1	0.466897910610193	1
chr11	1947791	1947791	0.429292964457022	1	0.467082148817341	1
chr11	85596390	85596390	0.429705893694554	1	0.467436432462772	1
chr21	35014337	35014337	0.429722764344337	1	0.467450357443545	1
chr2	85371196	85371196	0.429905395822934	1	0.467611030298616	1
chr11	43902112	43902112	0.430536036779088	1	0.468161334827234	1
chr13	50422122	50422122	0.430562012223991	1	0.468184632391219	1
chr16	2880105	2880105	0.430896211762538	1	0.46847437910653	1
chr4	185940969	185940969	0.431044834153479	1	0.468602114026312	1
chr4	169240010	169240010	0.431184887325482	1	0.468725028760441	1
chr2	5836111	5836111	0.431475437405069	1	0.468974875050076	1
chr8	127570482	127570482	0.431545330097025	1	0.46903539515882	1
chr13	25872067	25872067	0.431983966991369	1	0.469415654249154	1
chr2	66659348	66659348	0.432177845569821	1	0.469586770839805	1
chr10	31108190	31108190	0.432185075848299	1	0.4695934655421	1
chr17	4043867	4043867	0.432991385792663	1	0.470289446792648	1
chr3	13114803	13114803	0.43319945713998	1	0.470471542695062	1
chr4	129732568	129732568	0.433449303429616	1	0.470692735658877	1
chr19	56098601	56098601	0.433596586880097	1	0.470816989333465	1
chr3	97483471	97483471	0.433890885992969	1	0.47107138802066	1
chr1	15850601	15850601	0.434108329923498	1	0.471260981989644	1
chr16	980633	980633	0.43414903371345	1	0.471296865593943	1
chr8	101225344	101225344	0.434228031200526	1	0.471364883769257	1
chr5	2735160	2735160	0.434355230544124	1	0.471474676886888	1
chr11	74022558	74022558	0.434844747175907	1	0.471891890733889	1
chr6	29648564	29648564	0.434910355258394	1	0.471948394021256	1
chr17	213743	213743	0.435100484803561	1	0.472106388995409	1
chr19	36264029	36264029	0.435402817559187	1	0.472370963630093	1
chr14	99413386	99413386	0.435458517482278	1	0.47241862991043	1
chr17	38347710	38347710	0.43586394865324	1	0.472770503463036	1
chr15	71532066	71532066	0.435979633108891	1	0.472868781692721	1
chr14	104690882	104690882	0.436176457356353	1	0.473040166071463	1
chr1	45965343	45965343	0.436770679132024	1	0.473545482200661	1
chr7	100300649	100300649	0.436818880988545	1	0.473588060507255	1
chr8	789977	789977	0.437230471285618	1	0.473941540788411	1
chr1	5920438	5920438	0.437284832268251	1	0.473988671492565	1
chr5	16785399	16785399	0.438124347935997	1	0.474713841645119	1
[truncated: 2,325 more rows]
